# Supplementary material for: Central role of the p53 pathway in the noncoding-RNA response to oxidative stress
Source: Aging (Albany NY). 2017 Dec 12;9(12):2559–86. doi: 10.18632/aging.101341 (PMC5764393; doi:10.18632/aging.101341)
Supplement: Supplementary file 2 [file aging-09-2559-s002.xlsx]

## Sheet: Fuschi et al Dataset S1
Dataset S1. Genes significantly modulated in HUVEC treated with H2O2 for 16 hrs
Gene name	Gene biotype	log2 average expression	log2 fold change H2O2 16 hrs	log2 fold change H2O2 36hrs	p.value.adj.H2O2 16 hrs	p.value.adj.H2O2 36 hrs	F.p.value.adj
CDKN1A	protein_coding	8.5916	1.87259	1.45022	1.1e-07	5.3e-07	2.7e-07
GDF15	protein_coding	6.2106	2.4838	1.27078	1.1e-07	8.09e-06	2.7e-07
MDM2	protein_coding	8.6827	2.41435	1.75938	1.1e-07	7e-07	2.7e-07
HMOX1	protein_coding	4.4018	2.57241	1.54201	1.3e-07	5.28e-06	3.2e-07
MYH16	unitary_pseudogene	1.1654	4.46995	2.76304	1.4e-07	5.01e-06	3.2e-07
CYFIP2	protein_coding	5.0597	1.73701	1.45725	1.9e-07	5.9e-07	3.2e-07
VWCE	protein_coding	2.2989	2.76727	2.51837	2.8e-07	5.1e-07	3.2e-07
BTG2	protein_coding	5.3885	1.80178	1.50155	1.26e-06	1.92e-06	1.02e-06
FAS	protein_coding	2.2615	2.35954	1.60633	2.32e-06	1.8e-05	2.03e-06
ACAT2	protein_coding	5.8245	-1.63616	-0.52793	2.51e-06	0.00458046	2.26e-06
ASNS	protein_coding	4.7021	2.2735	0.15762	2.67e-06	0.528584	1.23e-06
SESN2	protein_coding	3.6235	1.76568	1.26011	4.02e-06	2.03e-05	2.92e-06
PSAT1	protein_coding	5.4906	1.62117	-0.35272	4.09e-06	0.0582906	5.8e-07
ALDH1L2	protein_coding	3.1362	1.76321	0.46262	4.09e-06	0.0281718	2.89e-06
CPM	protein_coding	2.0766	3.69598	3.26285	4.78e-06	3.87e-06	2.44e-06
MCM6	protein_coding	5.5952	-1.70398	-1.84141	4.93e-06	9.5e-07	1.29e-06
PTGS2	protein_coding	6.0461	1.22708	0.88997	4.96e-06	2.32e-05	4.51e-06
SLC6A9	protein_coding	-0.7575	4.10829	1.58173	4.96e-06	0.00509102	4.92e-06
GADD45A	protein_coding	5.3773	1.39326	0.52424	4.96e-06	0.00433204	4.97e-06
GPC1	protein_coding	3.4017	1.84154	1.25212	8.09e-06	7.2e-05	6.4e-06
CMBL	protein_coding	4.6617	1.24715	1.12689	8.96e-06	5.99e-06	4.16e-06
HIST1H3C	protein_coding	1.2112	-1.92312	-3.22966	1.21e-05	4e-07	8e-07
UHRF1	protein_coding	3.7637	-1.2774	-1.6074	1.27e-05	7.4e-07	1.59e-06
FAM212B	protein_coding	4.1978	1.45526	1.30894	1.27e-05	8.57e-06	5.22e-06
FABP4	protein_coding	1.2266	-2.77764	-1.76067	1.5e-05	0.00013078	1.11e-05
SLFN11	protein_coding	5.5743	-1.09924	-0.69094	1.5e-05	0.00019887	1.18e-05
PLK2	protein_coding	6.9319	1.00694	1.03429	1.77e-05	3.66e-06	4.52e-06
WDR76	protein_coding	4.3806	-1.52296	-1.80308	1.78e-05	1.67e-06	2.79e-06
DUT	protein_coding	4.3078	-1.46356	-1.47742	1.78e-05	4.83e-06	4.97e-06
HIST1H3J	protein_coding	3.1986	-2.1314	-3.09094	1.93e-05	7.3e-07	1.59e-06
IGFBP3	protein_coding	2.4366	-1.40603	-1.26225	2.47e-05	1.64e-05	9.65e-06
HIST1H2AI	protein_coding	1.944	-1.74703	-2.88683	2.55e-05	5.1e-07	1.17e-06
CDC6	protein_coding	5.0398	-1.57633	-1.94806	2.55e-05	1.62e-06	2.9e-06
GAL3ST4	protein_coding	2.2557	1.75514	1.71444	2.55e-05	8.26e-06	7.23e-06
XPC	protein_coding	5.5747	1.16002	0.86832	2.78e-05	9.06e-05	1.8e-05
HIST1H1D	protein_coding	3.6884	-1.78848	-3.16039	3e-05	3.6e-07	7.2e-07
MEOX2	protein_coding	2.9042	-1.40764	-1.28952	3e-05	1.75e-05	1.13e-05
HIST1H2BM	protein_coding	-0.5742	-2.28678	-3.1511	3.19e-05	2.06e-06	4.23e-06
TNFRSF10C	protein_coding	3.62	1.37396	1.35228	3.19e-05	1.05e-05	9.65e-06
ULBP1	protein_coding	0.4641	2.81881	0.97514	3.19e-05	0.0266375	2.53e-05
FAM101B	protein_coding	5.1624	-1.14238	-0.50947	3.19e-05	0.00422169	2.9e-05
HIST1H2BC	protein_coding	4.016	-1.43844	-2.31321	3.36e-05	5.1e-07	1.17e-06
CDCA7	protein_coding	4.2678	-1.25667	-1.31805	3.36e-05	7.42e-06	8.35e-06
ADM2	protein_coding	-0.8324	4.16835	2.14976	3.43e-05	0.00261536	3.32e-05
SPATA18	protein_coding	3.671	1.31851	1.75872	3.72e-05	1e-06	2.44e-06
HIST1H3B	protein_coding	4.0429	-1.36417	-2.98336	3.91e-05	1.6e-07	3.2e-07
HIST1H1A	protein_coding	3.1403	-1.95391	-2.95362	4e-05	1.08e-06	2.79e-06
CDKN2C	protein_coding	1.6344	-1.58089	-2.01938	4e-05	2.8e-06	5.22e-06
PAICSP4	processed_pseudogene	4.4244	-1.12246	-1.19069	4e-05	8.1e-06	9.65e-06
PLXNB2	protein_coding	4.4718	1.21374	1.18477	4e-05	1.49e-05	1.32e-05
FHL2	protein_coding	6.8029	0.99346	0.56414	4e-05	0.00121433	3.92e-05
PHLDA3	protein_coding	2.8041	1.48991	1.34499	4.03e-05	3.16e-05	1.91e-05
FAM129A	protein_coding	2.7352	2.04447	0.60273	4.03e-05	0.0571603	3.23e-05
MKI67	protein_coding	8.4361	-1.30293	-1.99667	4.15e-05	5.1e-07	1.29e-06
PVRL4	protein_coding	-1.3088	3.22474	0.81934	4.16e-05	0.107367	3.02e-05
HIST1H2BF	protein_coding	3.9222	-1.85485	-3.05786	4.41e-05	6.1e-07	1.59e-06
RRM2B	protein_coding	5.1786	1.01144	0.82506	4.62e-05	8.74e-05	3e-05
HMGCS1	protein_coding	5.5562	-0.94076	-0.30802	4.62e-05	0.0309992	4.11e-05
FDFT1	protein_coding	8.1045	-1.00933	-0.42414	4.62e-05	0.00924818	4.57e-05
HIST1H4B	protein_coding	0.2253	-2.12623	-3.14756	4.8e-05	2.19e-06	4.97e-06
ATF3	protein_coding	2.0257	1.86977	1.30234	4.8e-05	0.00039039	4.23e-05
CEACAM1	protein_coding	1.7847	2.26952	1.6448	4.88e-05	0.00029036	4.11e-05
USP1	protein_coding	4.147	-1.09815	-1.74443	5e-05	6.3e-07	1.69e-06
STEAP1	protein_coding	4.2397	-1.08546	-1.27402	5e-05	5.13e-06	8.59e-06
TP53INP1	protein_coding	5.5565	1.09466	1.19963	5e-05	7.73e-06	1.07e-05
CHAC1	protein_coding	1.0618	2.11391	0.45837	5e-05	0.174837	3.46e-05
HIST1H2AG	protein_coding	3.3654	-1.66497	-2.7794	5.01e-05	6.6e-07	1.81e-06
SLFN5	protein_coding	6.6616	0.88006	0.66979	5.22e-05	0.0001827	4.08e-05
FAT1	protein_coding	4.3061	1.03045	0.7772	5.67e-05	0.00023191	4.46e-05
MSMO1	protein_coding	6.983	-0.86712	-0.09112	5.95e-05	0.490523	3.02e-05
MSH6	protein_coding	6.1314	-0.88384	-0.85036	6.06e-05	2.79e-05	2.46e-05
FDXR	protein_coding	3.4794	1.62684	1.15978	6.06e-05	0.00040904	5.37e-05
HIST1H2AJ	protein_coding	1.1064	-1.69489	-3.19621	6.09e-05	7.3e-07	2.21e-06
E2F2	protein_coding	1.1024	-1.77001	-2.14399	6.38e-05	7.7e-06	1.17e-05
LPAR1	protein_coding	3.4668	-1.06621	-0.79856	6.7e-05	0.00025791	5.32e-05
BEX2	protein_coding	1.0274	2.02121	0.92522	6.7e-05	0.0101611	7.4e-05
LMNB1	protein_coding	4.9438	-1.0484	-1.59729	7.03e-05	1e-06	2.79e-06
GINS2	protein_coding	3.3696	-1.76466	-2.05469	7.09e-05	8.68e-06	1.33e-05
UNG	protein_coding	3.8011	-1.22883	-1.134	7.2e-05	5.31e-05	3.46e-05
HIST2H2BF	protein_coding	0.265	-1.83808	-2.99438	7.33e-05	1.79e-06	4.72e-06
KIF20B	protein_coding	5.4387	-1.04712	-2.13373	7.6e-05	1.8e-07	4e-07
PCK2	protein_coding	3.6829	1.27486	0.26072	7.61e-05	0.207147	5.27e-05
RP11-121L10.3	NA	7.3058	-0.99104	-1.10944	7.67e-05	9.99e-06	1.56e-05
TAF7L	protein_coding	1.9252	1.63456	1.05266	7.67e-05	0.00115783	8.13e-05
HIST1H3I	protein_coding	3.2182	-1.5157	-2.27571	7.94e-05	1.78e-06	4.72e-06
ZNF367	protein_coding	1.8096	-1.56132	-2.01423	7.94e-05	5.56e-06	1.07e-05
NEAT1	lincRNA	10.8135	1.11784	1.75021	8.18e-05	7.3e-07	2.26e-06
RP3-326I13.1	lincRNA	-1.1682	5.24977	3.52359	8.18e-05	0.00095504	8.34e-05
UBE2J1	protein_coding	6.853	-0.79325	-0.53287	8.3e-05	0.00075781	8.25e-05
ELOVL6	protein_coding	5.1807	-0.86011	-0.44924	8.63e-05	0.00422237	0.00010054
ASPM	protein_coding	6.8598	-1.025	-2.11581	8.65e-05	1.6e-07	3.2e-07
DEK	protein_coding	6.4077	-0.87859	-1.82953	8.65e-05	1.6e-07	3.2e-07
E2F8	protein_coding	4.3461	-1.15364	-1.84222	8.65e-05	1.01e-06	2.9e-06
ASF1B	protein_coding	2.7319	-1.30539	-1.8917	8.65e-05	2.19e-06	5.79e-06
HOPX	protein_coding	2.6665	-1.25717	-1.09513	8.65e-05	0.00010992	5.27e-05
HIST1H2AL	protein_coding	3.7057	-1.64065	-3.13426	8.76e-05	5.3e-07	1.59e-06
NDRG4	protein_coding	4.6809	0.93044	1.0048	9.27e-05	1.74e-05	2.48e-05
RP11-363E7.4	sense_overlapping	3.1001	1.21483	1.04493	9.27e-05	0.00013349	5.84e-05
ERN1	protein_coding	3.4377	1.11724	0.65262	9.27e-05	0.00272173	0.00010981
CES2	protein_coding	3.1661	1.15645	0.99487	9.51e-05	0.00013947	6.12e-05
CLSPN	protein_coding	5.1323	-1.22434	-2.00039	9.95e-05	9.6e-07	2.79e-06
ANLN	protein_coding	7.6169	-1.22447	-1.89638	9.95e-05	1.02e-06	2.92e-06
HIST1H4H	protein_coding	2.1246	-1.73185	-2.43924	9.95e-05	4.63e-06	1.01e-05
E2F1	protein_coding	1.1509	-1.45789	-2.02269	9.95e-05	5.27e-06	1.11e-05
HES2	protein_coding	2.7748	1.17961	1.37426	9.95e-05	1.02e-05	1.81e-05
ANKRD45	protein_coding	0.5983	3.06525	3.17289	9.95e-05	2.74e-05	3.28e-05
ATP5G1	protein_coding	5.1538	-0.8612	-0.51139	9.95e-05	0.00223779	0.00011832
PHGDH	protein_coding	3.8907	1.32391	-0.73228	0.00010605	0.0064186	4.12e-06
RRM2P2	processed_pseudogene	1.1862	-1.521	-2.31512	0.00010605	3.13e-06	7.67e-06
KIF20A	protein_coding	5.9299	-1.4531	-1.85706	0.00010605	5.64e-06	1.22e-05
ACTA2	protein_coding	1.3796	2.07148	1.88808	0.00010605	9.75e-05	5.84e-05
IDI1	protein_coding	7.5612	-0.93723	-0.36186	0.00010605	0.0261541	0.00012513
HIST1H2BH	protein_coding	1.8093	-1.74074	-2.75208	0.00010686	3.27e-06	8.02e-06
PLTP	protein_coding	3.5365	1.04376	0.90595	0.00010837	0.00015502	7.34e-05
ESCO2	protein_coding	4.1522	-1.30035	-2.11191	0.00011061	1.26e-06	3.79e-06
SULF1	protein_coding	1.7145	-1.05984	-0.5989	0.00011128	0.00313113	0.00014209
HIST1H1B	protein_coding	3.1142	-1.78573	-3.19955	0.00011157	1.19e-06	3.57e-06
DEPDC1B	protein_coding	3.5547	-1.40916	-2.12282	0.00011157	2.19e-06	5.95e-06
HELLS	protein_coding	5.3295	-1.07972	-1.31895	0.00011157	9.15e-06	1.8e-05
STOM	protein_coding	7.7871	0.8971	0.64129	0.00011157	0.00069434	0.00011375
CKAP2	protein_coding	6.2505	-0.81325	-1.55195	0.00011212	4e-07	1.03e-06
MCM5	protein_coding	4.2394	-1.04512	-1.54164	0.00011212	2.22e-06	6.15e-06
NRG1	protein_coding	6.4999	0.79553	0.48761	0.00011358	0.00217714	0.0001452
POLA1	protein_coding	5.0466	-0.9355	-1.34479	0.00011477	2.65e-06	6.94e-06
TMEM97	protein_coding	5.1869	-0.99931	-0.65721	0.00011724	0.00130524	0.00013932
FEN1	protein_coding	5.1402	-1.39805	-1.76099	0.00011867	8.21e-06	1.68e-05
DEPDC1	protein_coding	3.6421	-1.15129	-1.62301	0.00011902	3.71e-06	9.29e-06
HIST1H2BG	protein_coding	0.6041	-2.09321	-2.86807	0.00011902	1.43e-05	2.51e-05
LDHA	protein_coding	9.127	-0.81906	-0.76947	0.00011902	8.44e-05	6.17e-05
DAW1	protein_coding	1.3925	-1.5144	-0.84823	0.00011902	0.00329198	0.00016016
ACER2	protein_coding	2.3341	1.31896	1.1491	0.00012119	0.00018302	8.5e-05
CCNA2	protein_coding	5.5853	-1.02507	-1.82235	0.00012579	6.6e-07	2.03e-06
PSTPIP2	protein_coding	4.0608	1.3855	1.15552	0.00012579	0.00026911	0.00010054
COL12A1	protein_coding	3.5056	-1.15152	-0.384	0.00012579	0.0506124	0.00015412
FOXM1	protein_coding	4.3606	-0.88712	-1.40418	0.00012902	1.7e-06	4.87e-06
DGKA	protein_coding	4.9984	0.84927	0.97007	0.00013007	1.71e-05	3e-05
ATP6V0A1	protein_coding	5.1414	0.78832	0.77324	0.00013007	6.78e-05	5.84e-05
ABI3BP	protein_coding	5.4211	-0.86973	-0.51248	0.00013007	0.00313113	0.00017558
ST8SIA4	protein_coding	4.0384	-1.07106	-0.52026	0.00013063	0.00945226	0.00018412
RRM2P3	processed_pseudogene	2.7651	-1.32434	-2.14311	0.00014102	2.03e-06	5.82e-06
RP11-214C8.5	NA	2.5845	1.18633	0.73632	0.00014281	0.00283541	0.00018557
RRM2	protein_coding	7.695	-1.40027	-2.1446	0.00014341	1.8e-06	5.19e-06
SULF2	protein_coding	5.4107	0.98853	1.30602	0.00014341	5.52e-06	1.31e-05
RP11-152C15.1	processed_pseudogene	4.3586	-1.06045	-1.40203	0.00014341	7.42e-06	1.63e-05
SLC40A1	protein_coding	3.4057	1.42705	1.43587	0.00014341	6.37e-05	6.06e-05
TCEA3	protein_coding	1.1789	1.7833	1.68234	0.00014341	0.00010924	7.93e-05
FTH1	protein_coding	4.5262	1.03779	0.72387	0.00014341	0.00119883	0.00016978
ERCC6L	protein_coding	3.9895	-1.09072	-1.76983	0.00014369	1.71e-06	4.97e-06
CDKN3	protein_coding	3.3738	-1.48909	-1.7676	0.00014369	1.82e-05	3.26e-05
RP11-611O2.1	antisense	1.3905	1.61457	1.77659	0.00014369	2.72e-05	4.04e-05
RP11-424C20.2	processed_pseudogene	2.5076	-1.05918	-1.56688	0.00014555	3.72e-06	9.65e-06
HIST1H4L	protein_coding	-0.7544	-2.107	-3.00719	0.00014555	9.95e-06	2.14e-05
SLC9A1	protein_coding	5.4742	1.0519	0.70387	0.00014863	0.00160413	0.00018557
ZNF561	protein_coding	4.7373	0.89483	0.98418	0.00014939	2.89e-05	4.21e-05
CENPE	protein_coding	6.4639	-0.98379	-2.31609	0.00016114	1.6e-07	3.2e-07
SKA3	protein_coding	4.6639	-1.10982	-2.17714	0.00016121	5.3e-07	1.59e-06
JAG1	protein_coding	5.1271	0.77263	0.92182	0.00016214	1.53e-05	3.02e-05
KIF15	protein_coding	4.9241	-1.19374	-2.3386	0.0001703	5.6e-07	1.66e-06
FAM111B	protein_coding	2.6204	-1.87198	-3.10153	0.0001703	3.36e-06	9.36e-06
SYNE2	protein_coding	6.873	-0.80559	-1.21851	0.00018057	2.39e-06	7.05e-06
TUBA1B	protein_coding	7.8525	-0.82018	-1.00407	0.00020445	1.48e-05	3.11e-05
MCM10	protein_coding	4.1268	-1.10778	-1.90413	0.00020598	1.62e-06	4.87e-06
DHFR	protein_coding	4.5833	-1.39827	-1.56789	0.00021301	3.9e-05	5.62e-05
MTRNR2L12	protein_coding	8.8785	-1.03199	-0.64626	0.00021301	0.00305268	0.00026419
TXNIP	protein_coding	4.6676	0.86809	0.63388	0.00021943	0.00120006	0.00022636
CEP55	protein_coding	5.5722	-0.93912	-1.65214	0.00022173	1.08e-06	3.57e-06
MCM4	protein_coding	5.4206	-1.26287	-1.61292	0.00023216	1.39e-05	3.09e-05
HMGN2P5	processed_pseudogene	3.0118	-1.09691	-1.40789	0.00023216	1.53e-05	3.3e-05
STC2	protein_coding	4.8253	1.1715	0.19001	0.00023216	0.389444	0.00017558
ECI2	protein_coding	5.7235	-0.93169	-0.60918	0.00023216	0.00245573	0.00027413
VEPH1	protein_coding	7.0621	-0.72389	-0.43116	0.00023216	0.00445911	0.00029788
NPR2	protein_coding	3.1595	0.95077	0.73063	0.00023642	0.00093701	0.00022636
DHCR24	protein_coding	6.4754	-0.87089	-0.22266	0.00023642	0.160166	0.00023368
H2AFV	protein_coding	6.7415	-0.78538	-0.78211	0.0002376	0.00010611	0.00010128
ZMAT3	protein_coding	7.0931	0.81412	1.07645	0.00024374	9.26e-06	2.32e-05
PRC1	protein_coding	5.9936	-1.19551	-1.60267	0.00024462	9.5e-06	2.38e-05
SMC4	protein_coding	6.318	-0.76163	-1.83917	0.00024646	1.6e-07	3.2e-07
PLK4	protein_coding	4.1364	-0.89001	-1.91724	0.00024646	5e-07	1.23e-06
TRIB3	protein_coding	4.2221	0.97873	0.08712	0.00024646	0.655704	0.00014833
FAM46A	protein_coding	3.0158	1.16073	0.18505	0.00024646	0.408426	0.00018852
CYP51P2	NA	3.7645	-0.93494	-0.36686	0.00024646	0.0386064	0.0003281
YBX3	protein_coding	8.0207	0.72538	0.41395	0.00024646	0.00629033	0.00033694
JHDM1D	NA	4.5926	0.81655	0.46191	0.00024646	0.00728769	0.00033818
HSPA5	protein_coding	9.5	-0.67745	-0.16365	0.00024763	0.188657	0.00024314
EDA2R	protein_coding	2.401	1.45434	1.49482	0.00025016	9.11e-05	9.92e-05
FIGNL1	protein_coding	5.109	-0.89051	-1.22837	0.00025052	8.4e-06	2.18e-05
DRAXIN	protein_coding	-0.5687	2.38479	2.24708	0.00025052	0.00020217	0.00014603
ATAD2	protein_coding	6.1488	-1.03205	-1.71268	0.00025838	1.89e-06	5.82e-06
GAS2L3	protein_coding	5.3393	-0.84175	-1.30123	0.00026061	3.51e-06	1.01e-05
AMD1	protein_coding	5.4071	-0.78884	-0.87988	0.00026263	5.04e-05	7.34e-05
CCNE2	protein_coding	2.0704	-1.57126	-2.01897	0.00026302	2.3e-05	4.46e-05
BHLHE40	protein_coding	6.4803	0.80278	0.30686	0.00026785	0.0482455	0.00034876
LINC00342	lincRNA	6.3367	-0.73345	-0.24079	0.00027004	0.0811709	0.00033057
LRRC17	protein_coding	2.6653	-1.51035	-0.56602	0.00027004	0.0441895	0.00035718
SLC3A2	protein_coding	5.5419	0.85226	-0.01371	0.00027369	0.942264	0.00011022
KIF11	protein_coding	5.7265	-0.85689	-1.86435	0.00027471	4e-07	1.06e-06
RRM1	protein_coding	6.1814	-0.9617	-1.42582	0.00027471	4.83e-06	1.33e-05
C1orf110	protein_coding	1.6271	-1.16933	-0.89442	0.00027718	0.00105347	0.00027711
PEAR1	protein_coding	6.019	0.69072	0.64344	0.00027908	0.00023184	0.00016677
TRIM22	protein_coding	6.5086	0.67416	0.72379	0.00027969	6.98e-05	9.07e-05
KDELR2	protein_coding	7.9045	-0.67668	-0.19113	0.00028149	0.133043	0.00031752
MSH2	protein_coding	5.254	-0.77173	-1.10074	0.00028245	7.42e-06	1.94e-05
RIOK3	protein_coding	5.7498	0.70557	0.25331	0.00029003	0.0651638	0.00037232
CASC5	protein_coding	5.9034	-0.86637	-1.93884	0.00029608	3.9e-07	9.1e-07
AFF3	protein_coding	1.3051	1.51406	1.2354	0.00029756	0.00077583	0.00026905
MCM3	protein_coding	5.7945	-0.97886	-1.21867	0.00029969	2.23e-05	4.5e-05
SPIN4	protein_coding	3.4256	-0.94182	-1.4619	0.00030127	4.76e-06	1.33e-05
CDC25A	protein_coding	3.6023	-0.97327	-1.27962	0.00030127	1.68e-05	3.86e-05
UBE2T	protein_coding	4.6626	-1.18528	-1.64963	0.00030296	1.07e-05	2.73e-05
LINC00607	lincRNA	6.1364	-0.78762	0.27681	0.00030897	0.0675452	2.68e-05
ASNSP4	unprocessed_pseudogene	-1.3376	2.6431	0.20217	0.00030997	0.739398	0.00018337
ANKRA2	protein_coding	3.0438	1.14924	0.70921	0.00031716	0.00553775	0.00042964
PPM1D	protein_coding	4.0667	0.85468	0.34258	0.00031746	0.0477548	0.00042837
PTTG1	protein_coding	5.7722	-0.88347	-1.29511	0.00032136	6.42e-06	1.81e-05
FBXO5	protein_coding	4.0016	-1.06089	-2.15749	0.0003232	7.7e-07	2.69e-06
BUB1B	protein_coding	5.5438	-1.05116	-1.59936	0.0003232	5.21e-06	1.51e-05
DNMT1	protein_coding	6.2996	-0.65491	-0.91253	0.0003232	9.11e-06	2.48e-05
MRPL17	protein_coding	5.2407	-0.68653	-0.69186	0.0003232	0.00015052	0.00015136
PLK3	protein_coding	2.9724	1.23318	1.07581	0.0003232	0.00050896	0.00024544
PNMA2	protein_coding	4.3086	-0.78273	-0.18905	0.0003232	0.200581	0.00033638
MXD1	protein_coding	4.8827	0.73981	0.52703	0.00032465	0.00216354	0.00038574
PRPS1	protein_coding	4.2257	-0.82006	-0.95042	0.00032755	5.18e-05	8.2e-05
NCAPD3	protein_coding	5.3993	-0.80247	-1.27246	0.00032788	3.72e-06	1.11e-05
H2AFZP3	processed_pseudogene	2.5523	-1.20766	-1.42399	0.00032788	5.15e-05	8.2e-05
PARP1	protein_coding	6.1891	-0.76937	-0.87805	0.00032788	5.28e-05	8.32e-05
PPP1R15A	protein_coding	5.0614	1.01751	0.11275	0.00032788	0.5864	0.00022623
OPN1SW	protein_coding	2.0473	-1.11411	-0.69319	0.00032788	0.00460138	0.00045078
SGOL2	protein_coding	4.0508	-1.02046	-2.06248	0.00033078	8.5e-07	2.79e-06
DNA2	protein_coding	3.6039	-0.94873	-1.59982	0.00033078	2.8e-06	9.1e-06
PIDD	NA	2.0944	1.3844	1.25975	0.00033078	0.00038286	0.00022715
SRSF2	protein_coding	7.6454	-0.81257	-0.49488	0.00033078	0.00553775	0.00047018
MZF1	protein_coding	2.5801	1.1117	1.37159	0.00033137	2.57e-05	5.32e-05
RP11-298C3.2	processed_pseudogene	3.9959	-0.92893	-0.80315	0.00033532	0.00055916	0.0002705
DHFRP1	processed_pseudogene	3.2294	-1.22695	-1.7107	0.00033769	1.39e-05	3.46e-05
NLRP1	protein_coding	5.3521	0.71845	0.70647	0.00035417	0.00020351	0.000183
MT-RNR2	Mt_rRNA	18.2819	-0.78712	-0.58461	0.00036399	0.00163362	0.00040097
TRIM59	protein_coding	4.5501	-0.81832	-1.1094	0.00036692	1.54e-05	3.86e-05
C15orf54	lincRNA	4.6286	-0.93208	-0.45002	0.00036901	0.0201246	0.00055761
CDC7	protein_coding	3.6038	-0.91637	-1.51796	0.00037389	3.72e-06	1.11e-05
NUDCD2	protein_coding	5.5751	-0.82965	-0.77246	0.00037389	0.00034028	0.00023309
VLDLR	protein_coding	1.4932	1.58326	0.71318	0.00037389	0.0355918	0.00055052
KDELR3	protein_coding	4.5457	-0.77072	-0.03927	0.00037503	0.808574	0.00021817
NIPAL3	protein_coding	4.2363	0.79837	0.83761	0.00038489	0.00012973	0.00015412
EZH2	protein_coding	4.6776	-0.75857	-1.12854	0.00039022	7.99e-06	2.3e-05
CENPI	protein_coding	4.4328	-1.0115	-1.31082	0.00039312	2.53e-05	5.54e-05
PCNXL2	protein_coding	3.4626	0.90585	1.03521	0.00039312	6.47e-05	0.00010128
RP1-273G13.2	processed_pseudogene	2.5212	-1.21645	-0.99189	0.00039312	0.0009751	0.00036465
MX1	protein_coding	1.1371	1.49104	1.05467	0.00039312	0.00295553	0.00048909
DBF4	protein_coding	3.2113	-0.93007	-1.48612	0.00039329	5.21e-06	1.56e-05
TFDP1	protein_coding	7.4688	-0.71267	-0.74261	0.00039391	0.00013391	0.00016132
MTHFD1	protein_coding	4.8641	-0.76918	-0.95536	0.00039437	3.4e-05	7.03e-05
SNRPD1	protein_coding	5.471	-0.74797	-0.86376	0.00040565	6.57e-05	0.00010351
ASTN2	protein_coding	0.3177	1.69857	1.70444	0.00040565	0.00021022	0.00020249
LRP10	protein_coding	6.1441	0.70718	0.67716	0.00040565	0.00029269	0.00023005
EFNB1	protein_coding	3.3917	0.94879	0.77297	0.00040565	0.00109081	0.00039298
DDB2	protein_coding	5.627	0.71788	0.57397	0.00040565	0.00116188	0.00040097
MGP	protein_coding	5.6162	-1.07481	-0.33762	0.00040565	0.111491	0.00051832
TMEM237	protein_coding	4.7433	-0.83781	-0.58038	0.00040678	0.00301741	0.00051832
SKP2	protein_coding	5.4537	-0.78581	-1.07249	0.0004086	1.58e-05	4.07e-05
TBC1D2	protein_coding	2.8102	0.86016	0.20515	0.00041391	0.247069	0.00043827
RACGAP1	protein_coding	4.7967	-1.03527	-1.91773	0.00041466	1.8e-06	5.79e-06
CISD1	protein_coding	5.4633	-0.66005	-0.70244	0.00041566	0.00013078	0.00016382
DDIT3	protein_coding	1.6358	1.22786	0.01276	0.00041889	0.965967	0.00021383
MTRNR2L10	protein_coding	4.6147	-1.17608	-0.6063	0.00041889	0.0158846	0.00065551
YWHAH	protein_coding	6.0396	-0.76857	-0.69462	0.00041973	0.00048834	0.00029887
HMGN2	protein_coding	5.0304	-0.93474	-1.25121	0.00042896	2.09e-05	5e-05
MTRNR2L2	processed_pseudogene	7.8469	-0.88714	-0.84596	0.00042896	0.00031965	0.00025161
CYP51P1	NA	2.7892	-0.91855	-0.45689	0.00042896	0.0196258	0.00067323
ZFP36L1	protein_coding	6.8526	0.66778	0.32461	0.00042896	0.0230592	0.00067323
CTNNAL1	protein_coding	5.7458	-0.87425	-0.77054	0.00043445	0.00060943	0.00033871
MCM2	protein_coding	3.9129	-1.17221	-1.82013	0.00044285	8.25e-06	2.46e-05
LPXN	protein_coding	2.6413	1.09277	0.87203	0.00045516	0.00143454	0.00047114
BUB1	protein_coding	5.866	-1.16691	-1.69703	0.0004603	1.11e-05	3.17e-05
SESN1	protein_coding	5.232	0.73122	0.84311	0.00046784	7.2e-05	0.00011744
RP11-67K19.3	antisense	-0.431	2.05595	1.89795	0.00047251	0.00049882	0.000327
TBC1D4	protein_coding	6.5195	-0.66992	-0.63907	0.00047479	0.00035689	0.00028156
LXN	protein_coding	4.8827	-0.79754	-0.40322	0.00047479	0.019628	0.00073924
LDHAP4	processed_pseudogene	4.3706	-0.81893	-0.80832	0.00048957	0.0003048	0.00026566
MT-RNR1	Mt_rRNA	15.9983	-0.73096	-0.51751	0.00048957	0.00302817	0.00061461
ARHGDIB	protein_coding	8.689	-0.67743	-0.25614	0.00048957	0.0677349	0.0007024
CDCA3	protein_coding	3.6995	-1.21227	-1.76147	0.00049021	1.52e-05	4.07e-05
SNRNP25	protein_coding	4.2504	-0.96909	-0.70701	0.00049699	0.00256149	0.00060228
PRKAB2	protein_coding	4.7855	0.72826	0.60426	0.00052241	0.00115608	0.00047871
GJC1	protein_coding	5.3787	-0.76265	-0.38949	0.00052402	0.0197584	0.00081488
GEM	protein_coding	1.4453	1.32637	-0.10194	0.00053365	0.746064	0.00019157
NDRG1	protein_coding	5.1348	0.9289	0.67235	0.00053667	0.00302934	0.00065603
TP53I3	protein_coding	4.2272	0.86961	0.82938	0.00053743	0.00041898	0.000327
CACYBP	protein_coding	5.1379	-0.74844	-1.08983	0.00054543	1.31e-05	3.68e-05
FH	protein_coding	5.9609	-0.71308	-0.88221	0.00056338	5.04e-05	9.94e-05
MYH10	protein_coding	6.4287	-0.60124	-0.3343	0.00056817	0.0137571	0.00087106
DCP1B	protein_coding	4.2532	0.77542	0.42017	0.00056817	0.0174034	0.00087761
MYBL2	protein_coding	4.5304	-0.91055	-1.57897	0.00056844	3.79e-06	1.22e-05
KDELC2	protein_coding	5.8569	-0.7081	-0.87605	0.00057214	5.2e-05	0.00010128
SLC30A1	protein_coding	4.2432	0.82086	0.48362	0.00057214	0.0112862	0.0008696
KIF23	protein_coding	6.4063	-1.0405	-1.79636	0.00057862	3.34e-06	1.07e-05
HIST2H2AA3	protein_coding	1.3761	-1.30806	-2.20119	0.00057862	1.05e-05	3.13e-05
PHF19	protein_coding	4.7071	-0.82016	-1.19469	0.00057862	1.47e-05	4.08e-05
GINS1	protein_coding	4.3535	-1.09178	-1.52972	0.00057862	2.19e-05	5.59e-05
CHEK1	protein_coding	5.0254	-0.79317	-0.94867	0.00057862	7.49e-05	0.00013358
AC012360.6	antisense	4.2236	0.79947	0.86073	0.00057862	0.0001658	0.00021383
OSBPL3	protein_coding	6.2547	0.62421	0.56009	0.00057862	0.00068737	0.00042513
PTGR1	protein_coding	6.9078	0.83384	0.18062	0.00057862	0.297435	0.00060546
C10orf10	protein_coding	4.51	-1.01793	-0.34481	0.00057862	0.0999289	0.0007948
RAD51	protein_coding	3.4062	-1.08782	-1.29335	0.00060407	9.05e-05	0.0001536
PSAT1P3	processed_pseudogene	0.7411	1.43417	-0.01329	0.00060407	0.971606	0.00028675
HIST2H2AA4	protein_coding	1.3291	-1.44899	-2.2858	0.0006163	1.65e-05	4.46e-05
RNF168	protein_coding	5.9477	-0.62938	-0.59002	0.00062355	0.00054076	0.00039808
HMGB2	protein_coding	6.3586	-1.12996	-2.23954	0.00063237	1.44e-06	4.72e-06
C12orf75	protein_coding	4.853	-0.83232	-0.6885	0.00065113	0.00137717	0.0006065
HIST1H3F	protein_coding	-0.9604	-1.88248	-3.30577	0.00065868	1.63e-05	4.46e-05
FTLP3	processed_pseudogene	7.6704	0.62894	0.45551	0.00066307	0.00335131	0.00080228
VEGFA	protein_coding	2.5027	1.13878	0.47595	0.00067068	0.0621211	0.00097956
RFC2	protein_coding	3.6187	-1.04346	-1.19416	0.00067648	0.00013368	0.00020358
HNRNPDP1	processed_pseudogene	3.2143	-0.84039	-0.77574	0.00067648	0.00068816	0.00046558
VPS29	protein_coding	6.316	-0.75731	-0.47154	0.00068339	0.00840157	0.00097715
MNF1	NA	3.6223	-1.04431	-0.45958	0.00068339	0.0427765	0.00103975
H2AFZ	protein_coding	7.7032	-1.11302	-1.40607	0.00069079	5.04e-05	0.00010454
GPX8	protein_coding	6.6514	-0.83507	-0.47404	0.00069192	0.0140439	0.00104402
NUF2	protein_coding	4.3048	-1.06236	-2.00615	0.00072828	2.8e-06	9.6e-06
LAPTM5	protein_coding	6.371	0.62953	0.84844	0.00072946	2.85e-05	7.36e-05
APBB3	protein_coding	0.7152	1.56631	1.49634	0.00072946	0.00057432	0.0004453
C14orf1	protein_coding	6.0437	-0.58423	0.08651	0.00073739	0.492646	0.00019033
CDKN2D	protein_coding	2.1534	-1.05899	-1.13677	0.00073739	0.00025791	0.00029788
PDE4D	protein_coding	5.9224	0.67476	0.81199	0.00073776	8.11e-05	0.00015307
CENPN	protein_coding	4.3427	-0.81598	-1.33932	0.00074659	7.9e-06	2.48e-05
ARHGEF2	protein_coding	5.12	0.66321	0.3451	0.00074758	0.0242201	0.00113317
CMC2	protein_coding	5.1889	-0.66125	-0.88493	0.00075995	3.72e-05	8.91e-05
KLHL4	protein_coding	5.1119	-0.71557	-0.62626	0.00075995	0.00108532	0.00061231
ARNTL2	protein_coding	5.4978	-0.64335	-0.55388	0.00075995	0.00120006	0.0006412
NUCB2	protein_coding	4.7255	-0.74368	-0.49148	0.00075995	0.00654654	0.00103408
SLFN13	protein_coding	1.9196	-0.97691	-0.84909	0.00076103	0.00119305	0.0006412
SQSTM1	protein_coding	4.6977	0.81308	0.27238	0.00076731	0.128647	0.00102147
SLC7A14	protein_coding	0.2885	1.18757	1.35805	0.00080287	0.00013182	0.00021383
SDSL	protein_coding	0.1917	1.40979	1.34161	0.00081112	0.00066738	0.00050886
TTK	protein_coding	3.9021	-0.78217	-1.96708	0.00081194	5.1e-07	1.38e-06
NCAPH	protein_coding	4.5543	-0.89913	-1.70621	0.00081194	2.8e-06	9.6e-06
DONSON	protein_coding	4.3352	-0.76413	-0.86441	0.00081194	0.00017616	0.00025043
HAUS2	protein_coding	3.7158	-0.75205	-0.7108	0.00081194	0.00069083	0.00052446
FTH1P8	processed_pseudogene	6.2361	0.71833	0.64041	0.00081194	0.00098799	0.00061601
TUBA4A	protein_coding	3.6762	-0.84179	-0.71922	0.00081194	0.00140184	0.00070767
CEP250	protein_coding	4.5417	0.6937	0.11863	0.00081194	0.444722	0.00073028
DBI	protein_coding	6.5975	-0.82024	-0.49995	0.00081194	0.0108555	0.00116782
NEGR1	protein_coding	4.7854	-0.77573	-0.42378	0.00081194	0.0190219	0.00122127
STEAP1B	protein_coding	5.0208	-0.7242	-0.87685	0.00081226	9.68e-05	0.00017632
E2F7	protein_coding	5.5778	0.62723	-0.37967	0.00082691	0.0134416	2.71e-05
MANF	protein_coding	6.0473	-1.11551	-0.36026	0.00082691	0.133966	0.00109578
HIST1H2AC	protein_coding	2.3127	-1.19281	-1.52498	0.00083563	8.44e-05	0.00016407
CBS	protein_coding	3.8862	0.76455	-0.04593	0.00083563	0.808224	0.00033163
KDM4B	protein_coding	3.4927	0.86974	0.80922	0.00083563	0.00079971	0.0005807
SAT1	protein_coding	6.8879	1.10351	0.74452	0.00083563	0.0063575	0.00111712
SKA2	protein_coding	4.7711	-0.83951	-0.89716	0.00084492	0.00028801	0.00033943
ITGA2	protein_coding	8.1119	0.60664	0.4626	0.00084835	0.00301221	0.00095622
SCFD2	protein_coding	4.0066	-0.7068	-0.53313	0.00084835	0.00333313	0.00097956
HMGCR	protein_coding	7.1317	-0.6608	-0.1148	0.00084966	0.428454	0.00080751
ANP32E	protein_coding	6.0999	-0.8243	-1.26404	0.00085213	1.33e-05	4.02e-05
CD34	protein_coding	3.3239	-1.02754	-0.52603	0.0008625	0.0258719	0.00133216
POLE3	protein_coding	5.2853	-0.61233	-0.84423	0.00086978	3.37e-05	8.63e-05
FTL	protein_coding	9.2417	0.59386	0.38827	0.00086978	0.00779532	0.00119379
SLC6A6	protein_coding	6.1454	0.57598	0.23328	0.00086978	0.0710205	0.00127979
BCL2A1	protein_coding	0.108	-1.56995	-0.75363	0.00086978	0.0297682	0.00135228
RTKN2	protein_coding	2.3605	-1.00061	-1.81028	0.00087631	5.73e-06	1.92e-05
TPX2	protein_coding	7.1142	-0.94087	-1.53739	0.0008795	7.73e-06	2.48e-05
MPP4	protein_coding	3.9696	-0.74993	0.11181	0.00088162	0.49495	0.00023206
USP20	protein_coding	2.2171	0.95484	0.8592	0.00088162	0.00111462	0.00068997
FTH1P2	processed_pseudogene	6.2731	0.71965	0.65862	0.00088388	0.00090763	0.00063988
MLIP	protein_coding	3.0811	-0.95539	-0.63985	0.00088618	0.00691499	0.00119622
IGF2R	protein_coding	6.6236	0.55152	0.49238	0.00088936	0.00108884	0.00068891
AIM1	protein_coding	4.2872	-0.92391	-0.70803	0.00089071	0.00313684	0.00100997
NUSAP1	protein_coding	5.6729	-0.96389	-1.75031	0.00089191	3.88e-06	1.31e-05
OSTC	protein_coding	5.8545	-0.67713	-0.12782	0.00091772	0.390646	0.00092207
TMPO-AS1	antisense	1.039	-1.28831	-1.76799	0.00092083	6.39e-05	0.00013961
HMGB1P5	transcribed_processed_pseudogene	5.6706	-0.73984	-1.04282	0.00093542	3.03e-05	8.17e-05
MTRNR2L8	protein_coding	7.8326	-1.11152	-0.71985	0.00095005	0.00873159	0.00132651
SMC2	protein_coding	7.0468	-0.79517	-1.63348	0.0009563	1.44e-06	4.72e-06
PBK	protein_coding	3.817	-1.09555	-1.92337	0.00096717	7.42e-06	2.41e-05
SHISA3	protein_coding	1.233	-1.1768	-1.48552	0.00096717	0.00012017	0.00021817
CPEB4	protein_coding	5.1666	0.67975	0.50206	0.00096717	0.00440606	0.00116612
ABCA1	protein_coding	2.9174	1.34855	0.4751	0.00096717	0.128987	0.00132651
PRKDC	protein_coding	9.0537	-0.55457	-0.35799	0.00096717	0.00902941	0.00135609
HSD17B7	protein_coding	3.8343	-0.86993	-0.31239	0.00096717	0.105211	0.0013786
NR1D1	protein_coding	1.9456	1.06569	0.00148	0.00096992	0.996064	0.00050429
EXOSC8	protein_coding	4.3951	-0.72879	-1.08873	0.00097104	2.19e-05	6.22e-05
KIAA1524	protein_coding	5.0747	-0.92268	-1.63377	0.00097205	5.64e-06	1.91e-05
KIF4A	protein_coding	5.4932	-1.01784	-1.50255	0.00097686	2.32e-05	6.67e-05
ALDH18A1	protein_coding	5.4266	-0.61668	-0.30605	0.00097686	0.0337299	0.00153027
TOP2A	protein_coding	7.9023	-0.85965	-1.6644	0.00098154	2.09e-06	7.05e-06
ECT2	protein_coding	6.176	-0.8268	-1.46596	0.00098154	5.01e-06	1.66e-05
GMNN	protein_coding	3.4612	-1.09438	-1.63714	0.00098154	2.65e-05	7.42e-05
HIST2H2AC	protein_coding	1.7177	-1.42743	-2.24923	0.00098154	2.72e-05	7.5e-05
DLGAP5	protein_coding	6.3946	-1.15308	-1.65832	0.00098154	2.74e-05	7.6e-05
HIST2H2BE	protein_coding	1.3438	-1.02972	-1.17932	0.00098154	0.00024679	0.00034253
ANXA4	protein_coding	5.8959	0.61767	0.58058	0.00098154	0.00086313	0.00067311
OXCT1	protein_coding	5.4792	-0.64238	-0.60143	0.00098154	0.00090477	0.00068502
RP11-134G8.8	NA	1.4743	1.19111	0.96285	0.00098154	0.00268123	0.00104944
GTPBP2	protein_coding	4.5334	0.6816	0.18121	0.00098154	0.242737	0.00117496
MKNK2	protein_coding	4.3857	0.67621	0.47663	0.00098154	0.00611829	0.00129878
TSPYL5	protein_coding	3.3858	0.7567	0.31876	0.00098154	0.0717764	0.00148774
RBBP8	protein_coding	3.6224	-0.79197	-1.50566	0.00098173	3.73e-06	1.24e-05
ADAM32	protein_coding	1.8528	1.05906	1.35111	0.00098173	7.12e-05	0.00015617
TMPO	protein_coding	5.1353	-0.90588	-1.3477	0.00098234	2.3e-05	6.67e-05
GRINA	protein_coding	4.4335	0.70842	0.87916	0.00098924	9.36e-05	0.00018838
NUP88	protein_coding	5.4447	-0.64194	-0.77989	0.00098924	0.0001207	0.00022088
KPNB1	protein_coding	7.6419	-0.55624	-0.66781	0.0009907	0.00012254	0.00022266
GTSE1	protein_coding	4.3145	-0.88786	-1.53779	0.00099623	7.99e-06	2.58e-05
SERPIND1	protein_coding	2.1953	-0.94693	-0.17962	0.00100746	0.3905	0.00105726
TNFRSF14	protein_coding	2.1448	1.07148	0.80671	0.00102475	0.00444705	0.00125241
FANCI	protein_coding	5.864	-0.87094	-1.36706	0.00102886	1.47e-05	4.46e-05
BARD1	protein_coding	3.915	-0.90423	-1.5848	0.00103308	7.73e-06	2.51e-05
CALU	protein_coding	9.0636	-0.60119	-0.33302	0.00103308	0.0216928	0.00163615
FABP5P7	processed_pseudogene	3.0578	-0.79138	-0.67911	0.00104496	0.00181382	0.00096916
FAM114A1	protein_coding	5.9995	-0.55677	0.12108	0.00104845	0.330954	0.00021817
DPF2	protein_coding	4.7208	0.65313	0.4185	0.00106124	0.0112291	0.00155997
NUAK1	protein_coding	6.3094	0.62607	0.66108	0.00106381	0.00038647	0.00046135
RP11-297L17.6	processed_pseudogene	6.2106	-0.57371	-0.50779	0.00106381	0.00140786	0.00090265
CBX5	protein_coding	8.7421	-0.68826	-0.47198	0.00106381	0.00714528	0.00144828
TIPIN	protein_coding	2.9899	-0.79817	-1.14916	0.00108542	3.82e-05	0.00010108
NADSYN1	protein_coding	5.0724	0.63502	0.79838	0.00108542	9.25e-05	0.00019157
UACA	protein_coding	9.1086	-0.67032	-0.41275	0.00109547	0.0132079	0.0016443
PLA2G4C	protein_coding	2.4093	0.97883	1.56405	0.00112521	1.08e-05	3.52e-05
MCM7	protein_coding	5.3212	-0.9296	-1.30744	0.00114934	4.35e-05	0.00011022
SGK223	protein_coding	4.0939	0.7498	0.70217	0.00116901	0.00109139	0.00084546
SCD	protein_coding	9.0125	-0.60708	-0.18034	0.00116901	0.192925	0.0015214
INSIG1	protein_coding	6.2162	-0.61284	-0.33147	0.00116901	0.025918	0.00183708
NDC1	protein_coding	5.4868	-0.6538	-1.35306	0.00117374	1.89e-06	6.15e-06
NDC80	protein_coding	4.3913	-0.98839	-2.12508	0.00119103	1.98e-06	6.55e-06
NCAPG	protein_coding	6.0945	-1.05551	-2.06417	0.00119103	3.06e-06	1.03e-05
HIST1H2BI	protein_coding	-0.7642	-1.70468	-3.20894	0.00119103	2.7e-05	7.78e-05
TNFRSF10B	protein_coding	6.8928	0.53386	0.51037	0.00119103	0.00090147	0.00077025
PGM3	protein_coding	5.8173	-0.60658	-0.21621	0.00119175	0.121468	0.00171962
CYCS	protein_coding	8.0218	-0.83477	-0.81868	0.00119708	0.00074916	0.00070193
KLHL21	protein_coding	3.6126	0.76791	0.37484	0.00119855	0.0455965	0.00190594
VRK1	protein_coding	4.6925	-0.86421	-1.41262	0.0012018	1.43e-05	4.46e-05
GOLGA8B	protein_coding	4.7118	0.61141	0.95234	0.00121047	1.56e-05	4.87e-05
PPIF	protein_coding	4.335	-0.6455	-0.72456	0.00121047	0.00030626	0.00042539
HAUS1	protein_coding	3.5088	-0.76624	-0.7547	0.00121047	0.00081047	0.00073971
FKBP5	protein_coding	7.0456	-0.58944	-0.53829	0.00121047	0.00127148	0.00092352
PAICS	protein_coding	7.846	-1.07872	-0.98242	0.00122099	0.00129733	0.00093598
CDCA4	protein_coding	3.2528	-0.83359	-1.2091	0.00122168	4.15e-05	0.00010981
DPYSL3	protein_coding	6.7035	-0.61237	-0.41531	0.00122168	0.00845128	0.00168738
CDIP1	protein_coding	3.3608	0.88544	0.68037	0.00122537	0.00447744	0.00144828
BIRC5	protein_coding	3.9481	-1.29943	-1.45352	0.00122548	0.00034089	0.00046107
CSTF3	protein_coding	6.5113	-0.62252	-0.25901	0.00122555	0.0760578	0.0019086
TTYH3	protein_coding	6.1686	0.67192	0.76398	0.00122598	0.00024679	0.00038063
WHSC1	protein_coding	6.8847	-0.60743	-0.77632	0.0012464	9.55e-05	0.00020539
TMEM131	protein_coding	6.3819	0.58624	0.27835	0.0012464	0.0482455	0.00199891
RP11-307P22.1	processed_pseudogene	1.0487	-1.23309	-1.65993	0.00126213	0.00010611	0.00022009
ABLIM3	protein_coding	5.5261	0.56707	0.4481	0.00126213	0.00362765	0.00139274
DSN1	protein_coding	4.3852	-0.83679	-1.19973	0.00126689	4.59e-05	0.00011765
PVT1	lincRNA	5.1808	0.73757	0.78611	0.00126689	0.00044309	0.00054999
CENPF	protein_coding	8.1837	-0.8825	-2.05345	0.00126856	7.3e-07	2.44e-06
SHCBP1	protein_coding	5.4631	-1.1291	-1.6606	0.00126856	3.52e-05	9.94e-05
H2AFX	protein_coding	3.8888	-1.02071	-1.50579	0.00126856	3.98e-05	0.00010809
NUPR1	protein_coding	-0.3959	2.45115	0.32435	0.00126856	0.60712	0.00109214
A2M	protein_coding	2.5335	-1.10846	-0.36602	0.00128077	0.14956	0.00182866
POLR3K	protein_coding	3.8301	-0.80013	-0.84052	0.00128453	0.00055906	0.00063608
CISD2	protein_coding	4.5546	-0.78987	-0.62726	0.00128453	0.0035363	0.0014137
RP11-1033A18.1	NA	6.4241	-0.58098	-0.91298	0.00129068	1.68e-05	5.32e-05
NOP56	protein_coding	6.2079	-0.65342	-0.69674	0.00129827	0.00045319	0.00056553
ASPH	protein_coding	7.788	-0.51967	-0.29369	0.00129827	0.023	0.00206491
SVIP	protein_coding	4.7663	-0.67397	-0.63779	0.00130336	0.00115061	0.00093329
LRRC59	protein_coding	5.9356	-0.5689	-0.44136	0.00130336	0.00412781	0.00150239
MTRNR2L6	protein_coding	4.0765	-0.78255	-0.53479	0.00130336	0.0086445	0.00182024
CHAF1B	protein_coding	3.5464	-0.86057	-1.44554	0.00130378	1.43e-05	4.46e-05
CDCA2	protein_coding	4.8221	-0.93671	-1.80786	0.00130696	4.64e-06	1.56e-05
CCNF	protein_coding	4.2724	-0.76505	-1.36994	0.00130696	8.1e-06	2.73e-05
APOBEC3C	protein_coding	3.3693	0.75043	1.08634	0.00130696	3.28e-05	9.54e-05
CCNB1	protein_coding	6.429	-1.17292	-1.595	0.00130696	6.63e-05	0.00016132
ZER1	protein_coding	3.9772	0.76073	0.66013	0.00130696	0.00217837	0.00120691
PPIAP22	processed_pseudogene	7.1043	-0.73062	-0.62512	0.00132516	0.00223937	0.00122524
CBX3	protein_coding	6.3693	-0.62082	-0.72294	0.00135636	0.00023681	0.00038735
LDHBP2	processed_pseudogene	4.6701	-0.78304	-0.5881	0.00137237	0.00530335	0.0016821
WDR45	protein_coding	2.5289	0.89086	0.86494	0.00137773	0.00103315	0.00091682
TAP1	protein_coding	2.213	0.98549	0.62959	0.00137773	0.0148636	0.0020868
MTRNR2L1	protein_coding	3.9046	-1.25826	-0.48837	0.00137773	0.0984953	0.00211698
ITGBL1	protein_coding	4.699	-0.65559	-0.66862	0.00138086	0.00071926	0.00075999
CKAP2L	protein_coding	4.2942	-0.94206	-2.0918	0.00138226	1.82e-06	5.83e-06
ZWINT	protein_coding	4.4631	-1.13359	-1.90452	0.00138226	1.57e-05	5.02e-05
SPAG5	protein_coding	4.1222	-1.10565	-1.58049	0.00138226	5.92e-05	0.00014936
ANP32A	protein_coding	6.6381	-0.52641	-0.62861	0.00138226	0.00019874	0.00034472
MYL12A	protein_coding	8.2406	-0.63456	-0.19708	0.00138226	0.186294	0.00192286
DPYSL2	protein_coding	7.9843	-0.55379	0.04325	0.00139202	0.757191	0.00058081
RANBP1	protein_coding	4.8084	-0.82817	-0.81495	0.00141145	0.00095988	0.00090355
NACAD	protein_coding	1.8664	0.9878	1.27586	0.00143011	0.0001006	0.000221
MIS18BP1	protein_coding	5.0726	-0.65065	-1.42982	0.0014355	1.71e-06	5.36e-06
XRCC2	protein_coding	2.9927	-0.87105	-1.4449	0.00143784	1.77e-05	5.62e-05
RP11-75L1.2	processed_pseudogene	4.6743	-0.74601	-1.02451	0.001444	7.22e-05	0.00017626
KIAA0247	NA	4.4176	0.67025	0.69696	0.00144457	0.00062927	0.00072551
TRIM38	protein_coding	5.4731	0.61451	0.66784	0.00145534	0.00044682	0.00060131
RFC4	protein_coding	3.7264	-0.82889	-1.59751	0.0014638	5.52e-06	1.91e-05
GS1-44D20.1	processed_pseudogene	7.6667	-0.53447	-0.40658	0.00147551	0.00512435	0.00177484
ENPP1	protein_coding	2.8985	-0.81797	-0.71014	0.00147837	0.00238191	0.00136303
ORC1	protein_coding	2.5137	-0.92187	-1.72336	0.00148605	8.68e-06	3.01e-05
HIST1H2BD	protein_coding	0.5125	-1.25308	-1.9366	0.00149086	5.8e-05	0.00014968
CENPA	protein_coding	3.1328	-1.14663	-1.93771	0.00149587	1.8e-05	5.75e-05
EIF4A2P4	processed_pseudogene	3.0793	0.72962	0.2432	0.00149587	0.174292	0.00211417
SPATA7	protein_coding	3.1706	0.85889	0.76525	0.00149814	0.00208858	0.00131131
CALM1	protein_coding	8.6547	-0.51348	-0.21788	0.00151938	0.0797332	0.00240903
ARHGAP11A	protein_coding	6.3602	-0.77978	-1.66012	0.00154	1.96e-06	6.44e-06
PTMAP2	processed_pseudogene	5.7764	-0.60998	-0.83992	0.00154	7.16e-05	0.00017632
SEMA3D	protein_coding	2.7232	-0.78231	-1.02217	0.00154	0.00013078	0.00027453
SERBP1P1	processed_pseudogene	5.661	-0.59609	-0.71796	0.00154	0.00021679	0.00038574
SLC7A11-AS1	processed_transcript	3.9214	0.93742	0.25774	0.00154	0.264161	0.00196522
TNFSF9	protein_coding	0.0539	1.64351	0.64683	0.00154	0.12253	0.0023232
FAM21C	protein_coding	6.0312	0.52903	0.31713	0.00154	0.0201246	0.00241602
CHN1	protein_coding	3.6633	-0.70788	-0.4151	0.00154	0.0218732	0.0024287
FANCM	protein_coding	4.5742	-0.66559	-1.16819	0.00154113	1.07e-05	3.62e-05
AURKA	protein_coding	5.371	-0.94475	-1.52385	0.00154113	2.09e-05	6.61e-05
PRPS2	protein_coding	4.3713	-0.73185	-0.9805	0.00154113	0.0001006	0.00022623
ALCAM	protein_coding	7.6747	-0.61301	-0.53962	0.00154113	0.00214481	0.00135458
YBX3P1	NA	4.5224	0.65012	0.29534	0.00155039	0.0677349	0.00251472
RP11-137N23.1	processed_pseudogene	4.6005	-0.76394	-1.04405	0.0015522	8.74e-05	0.00020759
DSTN	protein_coding	7.5919	-0.62336	-0.31095	0.0015522	0.0447196	0.00256363
PDPR	protein_coding	4.8271	0.57481	0.27247	0.00157556	0.0580415	0.00258129
HMGB1	protein_coding	6.9836	-0.82742	-1.14358	0.00157637	6.89e-05	0.00017448
LINC00910	lincRNA	1.3599	1.1787	0.91179	0.00158336	0.00560654	0.0019391
CDK1	protein_coding	4.4185	-0.81431	-1.78497	0.00158468	2.12e-06	7.05e-06
RMI1	protein_coding	3.0967	-1.03437	-1.23305	0.00159256	0.00029159	0.00047039
PTP4A2	protein_coding	7.212	-0.50268	-0.34643	0.00160151	0.00981136	0.00224278
FAM83D	protein_coding	3.9833	-0.88463	-1.59275	0.00162517	1.1e-05	3.7e-05
MMS22L	protein_coding	5.034	-0.72737	-1.27746	0.00162517	1.12e-05	3.78e-05
HMGN2P4	processed_pseudogene	1.3487	-0.98453	-1.31932	0.00162517	0.00014419	0.00029887
ZFHX4	protein_coding	1.9252	0.85007	0.93855	0.00162517	0.00046865	0.0006516
AC005795.1	processed_pseudogene	5.7867	-0.57725	-0.54792	0.00162517	0.00136565	0.00115627
ARL6IP6	protein_coding	4.0203	-0.81756	-0.77693	0.00162517	0.00140819	0.00116612
BLOC1S2	protein_coding	4.6168	0.64584	0.42508	0.00162517	0.0138675	0.00242398
TUBA1C	protein_coding	7.5869	-0.60889	-0.84248	0.00162589	6.97e-05	0.00017626
TSPYL2	protein_coding	3.528	0.64855	0.87721	0.00163162	8.48e-05	0.00020513
CEACAM19	protein_coding	3.042	0.97438	1.2456	0.00164659	0.00013284	0.00028465
RP11-93L9.1	NA	1.4481	-1.3094	-0.61001	0.00164659	0.0561978	0.00272509
HJURP	protein_coding	5.335	-0.88287	-1.74536	0.00166185	4.64e-06	1.56e-05
PTPN13	protein_coding	3.8217	0.68538	0.03683	0.00166374	0.845837	0.00117045
HSPE1	protein_coding	4.3115	-0.66302	-1.18382	0.00166625	1.07e-05	3.61e-05
POLQ	protein_coding	4.8661	-0.7729	-1.6332	0.00166924	2.8e-06	9.65e-06
TIMM17A	protein_coding	6.4235	-0.62521	-0.34753	0.00166924	0.0297534	0.00272637
SPCS3	protein_coding	6.8171	-0.54636	-0.37093	0.00166946	0.0111576	0.00240196
ANGPTL4	protein_coding	0.8664	1.41391	1.24608	0.00170031	0.00256227	0.00155997
ZFYVE26	protein_coding	5.5973	0.55917	0.40881	0.00170154	0.0077408	0.00224278
ISCU	protein_coding	5.4804	0.62054	0.67376	0.00170185	0.0005474	0.00072585
EVI2B	protein_coding	0.948	-1.1191	-1.19946	0.00171894	0.0007649	0.00090355
KDM5B	protein_coding	6.1519	0.50922	0.6235	0.00173033	0.00020961	0.00039422
UBE2N	protein_coding	4.9272	-0.58778	-0.50252	0.00173033	0.00304387	0.00168738
VKORC1L1	protein_coding	5.8763	-0.51645	-0.41471	0.00175845	0.00445333	0.0019584
TLL1	protein_coding	2.8501	0.9022	0.87922	0.00175898	0.00129763	0.00117496
SFXN2	protein_coding	1.6424	-0.90148	-0.50899	0.00179038	0.0282371	0.00288733
CYP2S1	protein_coding	1.4845	1.00166	0.77207	0.00179528	0.0063056	0.00220719
STIL	protein_coding	4.9256	-0.6963	-1.42818	0.00179745	3.72e-06	1.25e-05
HNRNPD	protein_coding	8.5101	-0.57408	-0.6624	0.00181659	0.00035479	0.00057361
ABTB2	protein_coding	-0.564	1.82295	0.70394	0.00181659	0.138803	0.00273338
C18orf54	protein_coding	4.4825	-0.66455	-1.21604	0.00182101	9.5e-06	3.28e-05
HIST1H2BK	protein_coding	3.8629	-0.71592	-1.11529	0.00182101	3.74e-05	0.0001101
POLR2D	protein_coding	4.1907	-0.59807	-0.75969	0.00182101	0.00019271	0.00037693
MCM8	protein_coding	4.8625	-0.69316	-1.59352	0.00182223	1.71e-06	5.36e-06
KIF14	protein_coding	4.2901	-0.84571	-1.74409	0.00182223	4.21e-06	1.43e-05
CDC45	protein_coding	4.2161	-1.05701	-1.80692	0.00182271	1.99e-05	6.43e-05
RP11-570P14.1	processed_pseudogene	4.1409	-0.83356	-0.8551	0.00183362	0.00097933	0.00105291
DBF4P1	processed_pseudogene	1.4894	-1.02589	-1.80489	0.00184556	2.26e-05	7.36e-05
MYO5C	protein_coding	3.1664	-0.73352	-0.20949	0.00184556	0.238575	0.00249651
MOV10L1	protein_coding	3.6105	0.72396	0.90658	0.0018689	0.00019515	0.00038491
SLC4A11	protein_coding	1.6124	1.08602	1.33431	0.0018689	0.00022009	0.00041891
NPM1P27	processed_pseudogene	9.0372	-0.55676	-0.7956	0.00186929	6.29e-05	0.00016767
ASXL3	protein_coding	1.1262	1.28575	1.74532	0.0019114	9.06e-05	0.00022104
PKP4	protein_coding	5.7253	-0.52999	-0.45111	0.0019114	0.00335427	0.00187482
YWHAE	protein_coding	8.7093	-0.59966	-0.40277	0.0019114	0.0129932	0.00275148
MT-ND6	protein_coding	7.9136	-0.80428	-0.29655	0.0019114	0.13617	0.00291139
NPM1P39	processed_pseudogene	5.4665	-0.60348	-0.81408	0.00191865	0.00011322	0.00026566
ARHGAP18	protein_coding	6.8793	-0.55423	-0.49593	0.00192105	0.00239938	0.0016443
H2BFS	protein_coding	-0.0323	-1.24518	-2.05368	0.00192181	5.18e-05	0.00014603
MAP2	protein_coding	6.3458	-0.5244	-0.25605	0.00192181	0.054823	0.00319257
SERPINB2	protein_coding	3.9488	-0.77389	-0.96079	0.00192786	0.00025791	0.00047143
LRR1	protein_coding	2.6644	-0.97783	-1.20415	0.00193382	0.00029609	0.00051604
ANKRD36C	protein_coding	6.3603	-0.62471	-0.53238	0.00193382	0.00335142	0.00189873
POLD3	protein_coding	4.6869	-0.72771	-1.28348	0.00193754	1.41e-05	4.56e-05
ZWILCH	protein_coding	5.345	-0.74714	-1.17959	0.00193845	3.25e-05	0.00010054
CDC20P1	processed_pseudogene	2.1289	-1.20022	-1.59671	0.00193845	0.00019257	0.00038574
SRSF7	protein_coding	7.2823	-0.64585	-0.80223	0.00193845	0.00021579	0.00041967
ALG14	protein_coding	2.2666	-0.82839	-0.68113	0.00193845	0.00440606	0.00210931
CCNYL1	protein_coding	5.9278	-0.51277	-0.16489	0.00193845	0.192925	0.00278934
APOD	protein_coding	1.0699	1.38402	1.72539	0.00195364	0.00020647	0.00040559
REV3L	protein_coding	6.026	0.53991	0.14732	0.00195498	0.274392	0.00258515
ITPKC	protein_coding	2.3327	0.84548	0.87776	0.00195511	0.00092789	0.00106185
NRXN3	protein_coding	3.2477	-0.76734	-0.40985	0.00195511	0.0386432	0.00325537
TCF19	protein_coding	2.0768	-1.10624	-1.84295	0.00195715	3.82e-05	0.00011361
ADCY4	protein_coding	3.3504	1.09716	1.69131	0.0019959	3.14e-05	9.92e-05
PPAT	protein_coding	4.8288	-0.68589	-0.87782	0.0019959	0.0002023	0.00040342
CCDC136	protein_coding	1.2765	1.11746	1.14438	0.0019959	0.00104016	0.00113317
CEBPB	protein_coding	1.0246	1.26936	0.489	0.0019959	0.142888	0.00307927
LYAR	protein_coding	4.4356	-0.65754	-0.89459	0.00199926	0.00012481	0.00028773
NINJ1	protein_coding	3.1886	0.86092	0.72734	0.00199926	0.00398943	0.0020868
SNAP25	protein_coding	0.4038	-1.43516	-0.28407	0.00200372	0.393242	0.0023545
FDPSP1	processed_pseudogene	4.1277	-0.9148	-0.25392	0.00200372	0.255329	0.00272637
SMYD2	protein_coding	5.1219	-0.57763	-0.35244	0.00200945	0.0223251	0.00321034
CLGN	protein_coding	0.9062	-1.35609	-1.4236	0.00202389	0.00109331	0.00117205
AC110769.3	lincRNA	-0.4347	1.45689	1.22162	0.00202389	0.0044324	0.00219627
FLYWCH1	protein_coding	3.019	0.88161	0.73202	0.00203479	0.0045187	0.00221887
RAD51AP1	protein_coding	4.5109	-1.06197	-2.17518	0.00204339	5.56e-06	1.94e-05
CXCL16	protein_coding	1.5381	0.91247	0.99284	0.00204339	0.00067902	0.00092131
PIK3R3	protein_coding	4.8889	-0.57968	-0.11508	0.00204339	0.427858	0.00232725
TTC18	NA	-0.7606	1.76399	2.03087	0.0020513	0.00041738	0.0006734
ATAD5	protein_coding	4.3008	-0.65894	-1.33799	0.00207898	5.21e-06	1.81e-05
TRIP13	protein_coding	5.0317	-0.82157	-1.31698	0.00207898	3.32e-05	0.0001034
SMC1A	protein_coding	7.5076	-0.57475	-0.84165	0.00207898	6.07e-05	0.00016765
DKC1	protein_coding	6.9152	-0.61315	-0.89329	0.00207898	6.39e-05	0.00017427
NUDT15	protein_coding	3.964	-0.99667	-0.98504	0.00207898	0.00143006	0.00138005
SMCO4	protein_coding	1.1296	-1.07638	-0.73844	0.00207898	0.0125445	0.00301802
UBR4	protein_coding	8.1843	0.51239	0.32902	0.00207898	0.017836	0.00321199
ZNF175	protein_coding	5.594	0.55843	0.36018	0.00207898	0.0180806	0.00321696
PHACTR2	protein_coding	7.6467	-0.47812	-0.25575	0.00207898	0.0405227	0.00351737
CPEB2	protein_coding	3.7958	0.77399	0.48736	0.00208999	0.0217109	0.00332559
AC022182.2	processed_pseudogene	4.0812	-0.75416	-0.95429	0.00211591	0.00024967	0.00047894
SERTAD4	protein_coding	2.4965	-1.16253	-1.09485	0.00211711	0.00202348	0.00164335
KIF18A	protein_coding	4.9303	-0.83712	-1.93265	0.00211797	2.06e-06	6.84e-06
HMMR	protein_coding	5.0637	-0.95102	-1.18904	0.00212177	0.0002687	0.00050435
KNTC1	protein_coding	5.4748	-0.69741	-1.26139	0.00214469	1.22e-05	4.11e-05
SLC7A11	protein_coding	8.0305	0.51653	0.051	0.00214668	0.713218	0.0018431
MANEA	protein_coding	4.6145	-0.71276	-0.84799	0.00217472	0.00040224	0.00067311
RGAG4	protein_coding	0.7126	1.15896	0.99426	0.00217472	0.00405417	0.00223847
HIST2H2AB	protein_coding	0.983	-1.11645	-2.19846	0.00218313	1.74e-05	5.8e-05
RP4-756G23.5	antisense	-0.3999	1.62117	0.54088	0.00218313	0.213352	0.0031765
GCNT1	protein_coding	3.6007	-0.74455	-0.68582	0.00218706	0.0024461	0.00183197
BCAT1	protein_coding	8.2407	-0.5453	-0.36285	0.00219482	0.0154439	0.00329319
SNHG3	sense_intronic	7.6731	-0.76153	-0.41686	0.00220164	0.0380374	0.0037019
EBP	protein_coding	5.2426	-0.92172	-0.21248	0.00223835	0.357752	0.00275148
P4HTM	protein_coding	2.3541	0.89786	0.43526	0.00223835	0.0687742	0.00377867
KIF4B	protein_coding	3.6149	-0.94347	-1.35073	0.00224443	0.00010713	0.0002658
CDC20	protein_coding	4.1928	-1.03985	-1.45171	0.00225159	0.00013072	0.00031016
STRA13	protein_coding	3.2919	-0.77008	-0.7184	0.00225159	0.00235795	0.00182866
STMN1	protein_coding	6.7762	-0.90471	-1.06472	0.00225597	0.00041182	0.00069407
ARHGAP21	protein_coding	7.7336	0.51507	0.47829	0.00225597	0.0022457	0.00179247
CYB5B	protein_coding	6.7044	-0.57556	-0.46206	0.00225597	0.00558462	0.0025792
CENPW	protein_coding	4.0101	-1.0627	-1.29654	0.00225832	0.00037422	0.00065551
STK36	protein_coding	2.8741	0.79464	0.83712	0.00227578	0.00099105	0.0011789
RETSAT	protein_coding	3.3979	0.75388	0.57254	0.00228883	0.00854373	0.00296494
SNRPG	protein_coding	4.2319	-0.76288	-0.87302	0.00230336	0.00058457	0.00089163
CACYBPP2	processed_pseudogene	4.6281	-0.74675	-1.11041	0.0023085	7.43e-05	0.00020236
NUCKS1	protein_coding	8.0348	-0.54047	-0.61186	0.00233332	0.00056262	0.00087341
VEGFC	protein_coding	4.7927	-0.52571	-0.60893	0.00235855	0.00052518	0.00083576
MELK	protein_coding	5.8686	-0.87284	-1.61399	0.00236797	1.13e-05	3.92e-05
FAM64A	protein_coding	2.3037	-1.04413	-1.90067	0.00236908	2.26e-05	7.49e-05
C7orf41	NA	3.6975	0.82722	1.05951	0.00236908	0.00021579	0.00045078
DTYMK	protein_coding	5.0703	-0.64179	-0.979	0.0023925	5.92e-05	0.00016774
PIGW	protein_coding	2.9182	-0.71313	-0.35429	0.00240596	0.0581175	0.00404362
TLR4	protein_coding	5.9972	-0.57988	-0.45329	0.00241159	0.00695782	0.00288831
FAM111A	protein_coding	5.3152	-0.66364	-1.13101	0.00241167	2.26e-05	7.5e-05
MINOS1P2	processed_pseudogene	3.7016	-0.83999	-0.46876	0.00242348	0.0366028	0.0040176
ZNF528	protein_coding	3.5048	0.69174	1.02059	0.00243772	6.63e-05	0.00018437
CDK2	protein_coding	3.7566	-0.70863	-0.74285	0.00243772	0.00115061	0.00133682
PGP	protein_coding	3.4069	-0.70174	-0.58204	0.00243772	0.00516312	0.00264634
PTMAP5	transcribed_processed_pseudogene	6.4617	-0.76637	-0.9344	0.0024421	0.00034089	0.00063608
RP11-511H9.4	NA	1.8804	-0.79141	-1.16686	0.00247672	0.00010474	0.00026698
TMEM71	protein_coding	0.5096	-1.25864	-0.77795	0.00249759	0.022514	0.00389963
HIST1H4E	protein_coding	3.6144	-1.12014	-1.53909	0.0025053	0.00017767	0.00039736
RAD1	protein_coding	4.2799	-0.64183	-0.90748	0.00251538	0.0001207	0.00029788
TOM1	protein_coding	3.1519	0.8053	0.62053	0.00251849	0.00849365	0.00318611
RPL36AL	protein_coding	6.9458	-0.57406	-0.51593	0.00252874	0.00307426	0.00220503
PARP6	protein_coding	4.0718	0.59758	0.65254	0.00253452	0.00083666	0.00113317
TMEM173	protein_coding	5.1477	0.71945	0.55973	0.00255367	0.00782763	0.00313764
RBBP7	protein_coding	6.7156	-0.6336	-0.74801	0.00256938	0.0004605	0.00079058
ATP13A1	protein_coding	3.7264	0.65386	0.66574	0.00256938	0.0014057	0.00153027
ZKSCAN1	protein_coding	6.4457	0.52568	0.64478	0.00257782	0.00033768	0.00063988
FLNC	protein_coding	6.9339	0.6122	0.59347	0.00257782	0.00188526	0.00178805
FAM21A	protein_coding	5.4948	0.49655	0.33163	0.00257782	0.0178241	0.00386168
BMP2	protein_coding	3.1777	0.71305	0.55865	0.00258707	0.00791228	0.00318611
DYNLL1	protein_coding	7.4764	-0.56143	-0.36312	0.00260794	0.0201185	0.00398594
KPNA2	protein_coding	7.6547	-0.65484	-1.03019	0.00262406	4.27e-05	0.00013202
COL8A1	protein_coding	4.8503	-0.65157	-0.0535	0.00262406	0.766572	0.00215673
PRDX3	protein_coding	6.1647	-0.67307	-0.61085	0.00262406	0.00304396	0.00224278
RP11-645N11.2	NA	1.4481	-0.91042	-0.21433	0.00262406	0.349984	0.00330734
SAE1	protein_coding	6.3786	-0.59624	-0.72265	0.00265035	0.00039365	0.00071073
RP11-673C5.1	processed_pseudogene	3.9772	-0.76675	-1.00475	0.00265548	0.00025027	0.00051832
SQLE	protein_coding	6.3445	-0.56552	-0.13396	0.00268293	0.361981	0.00333835
2017-09-02	protein_coding	9.1719	-0.46406	-0.14668	0.00268363	0.222587	0.00388389
DTL	protein_coding	5.2025	-0.87768	-2.02333	0.00268733	2.67e-06	9.19e-06
DCLRE1B	protein_coding	3.8187	-0.68307	-1.20726	0.0026994	2.21e-05	7.44e-05
ACTB	protein_coding	11.2873	-0.46094	-0.14655	0.0026994	0.220396	0.00391926
SAPCD2	protein_coding	1.7472	-1.03359	-1.64418	0.00270028	8.12e-05	0.00022009
SCN10A	protein_coding	-0.1427	-1.41712	-1.65339	0.00270028	0.00078229	0.00113047
LACC1	protein_coding	2.1626	0.91645	0.30954	0.00270028	0.210695	0.00398162
MAD2L1	protein_coding	3.4318	-0.79743	-1.684	0.00270209	5.97e-06	2.14e-05
LSMD1	NA	3.4191	-0.75597	-0.35042	0.00270209	0.0787052	0.00452291
TRBC2	TR_C_gene	6.7493	-0.74757	-1.0208	0.00272635	0.00015198	0.0003639
MALAT1	misc_RNA	12.6239	0.52407	0.73564	0.00272824	0.00011612	0.00029788
RP11-304L19.5	NA	2.7939	-0.89979	-0.61207	0.00275026	0.0163998	0.0040298
TK1	protein_coding	4.1897	-0.85502	-1.47755	0.00278368	2.9e-05	9.7e-05
RGS11	protein_coding	-0.3074	1.38619	1.98845	0.00278368	8.74e-05	0.00023414
SNX29	protein_coding	4.7458	0.60896	0.60166	0.00278368	0.00187741	0.00185957
HGS	protein_coding	3.5368	0.7129	0.40951	0.00278368	0.0393372	0.00459793
UBE2H	protein_coding	7.7056	0.45505	0.43228	0.00279066	0.00236053	0.00207932
MXD3	protein_coding	0.8848	-1.39729	-1.63247	0.00280565	0.00078192	0.00114644
VPS11	protein_coding	4.9866	0.55718	0.22784	0.00280565	0.126075	0.00452291
ZNF655	protein_coding	4.055	0.57608	0.18584	0.00281374	0.228166	0.00408227
KIFC1	processed_transcript	2.9893	-0.89308	-1.60687	0.00283478	2.46e-05	8.23e-05
CNN3	protein_coding	7.2849	-0.5047	-0.3292	0.00283679	0.0205958	0.00432269
ALDH1A2	protein_coding	4.1884	-0.65076	-0.85457	0.00284012	0.0002638	0.00055651
PDGFC	protein_coding	3.2498	0.67608	0.59915	0.00286763	0.00408685	0.00270366
MLEC	protein_coding	6.3747	-0.47908	-0.1389	0.00290789	0.268564	0.00403052
TICRR	protein_coding	4.2251	-0.64767	-1.28053	0.00291175	9.75e-06	3.42e-05
UBN2	protein_coding	5.4963	0.59622	0.64289	0.00292227	0.00105347	0.00138405
SNAI1	protein_coding	2.6085	0.91499	0.92682	0.00292227	0.0016702	0.00180928
PCDH18	protein_coding	1.3003	-1.15338	-1.11472	0.00292227	0.00249525	0.00220415
ZNFX1	protein_coding	5.4803	0.53775	0.49128	0.00292227	0.00329198	0.00248829
LDHB	protein_coding	8.9684	-0.62981	-0.51401	0.00292227	0.00631975	0.00323384
HNRNPA2B1	protein_coding	10.0801	-0.60155	-0.60121	0.00294425	0.0017419	0.00184563
ACACA	protein_coding	7.5222	-0.45792	-0.05841	0.00294886	0.644433	0.00278345
PPIA	protein_coding	8.9191	-0.72367	-0.54312	0.00294886	0.0102468	0.00381133
POLE2	protein_coding	2.2515	-0.81502	-1.22122	0.00295773	0.00011299	0.00029657
CENPM	protein_coding	2.218	-1.19697	-1.75511	0.00299118	0.00015828	0.00038584
HSP90AA1	protein_coding	9.8232	-0.59112	-0.88269	0.00299772	7.9e-05	0.00021992
MMAB	protein_coding	4.0628	-0.86576	-0.39569	0.00300217	0.086453	0.00502729
LINC00152	lincRNA	5.7806	-0.62224	-0.14422	0.0030172	0.380602	0.00376448
TRIM66	protein_coding	2.533	0.7484	0.98681	0.00302912	0.00023078	0.00050731
RP11-386M24.4	transcribed_processed_pseudogene	0.2183	-1.2302	-0.95771	0.00302912	0.00828952	0.00366125
EIF4A2	protein_coding	8.5665	0.48908	0.166	0.00302912	0.19985	0.00454586
ATP5J	protein_coding	5.7958	-0.60929	-0.32574	0.00302912	0.0507654	0.00507206
LMNB2	protein_coding	5.581	-0.60423	-0.8452	0.0030294	0.00015198	0.00037506
RP11-243J16.7	antisense	1.4598	0.92888	0.87379	0.00310838	0.00303986	0.00248791
DOK5	protein_coding	2.1191	-0.77564	-0.43979	0.00310985	0.0408906	0.00512103
PSMD12	protein_coding	6.3826	-0.48696	-0.55404	0.00311542	0.00075459	0.00116521
IFNE	protein_coding	2.3337	0.81655	1.35041	0.00312375	3.08e-05	0.00010128
TPM3P8	processed_pseudogene	5.1667	-0.52408	-0.4818	0.00312818	0.00337437	0.00263239
SEPW1	protein_coding	4.9485	-0.61666	0.05836	0.00313287	0.737332	0.00136797
TUBB	protein_coding	9.8114	-0.56146	-0.65112	0.00318015	0.0006484	0.00107543
NBR2	transcribed_unprocessed_pseudogene	2.7225	0.78755	0.65244	0.00318015	0.00683805	0.00353447
MND1	protein_coding	2.659	-0.84088	-1.97741	0.00318262	3.83e-06	1.31e-05
TM4SF18	protein_coding	6.7464	-0.59	-0.55391	0.00318431	0.00296859	0.00249376
SDC1	protein_coding	1.6585	1.31292	0.94991	0.00318891	0.0151737	0.00446461
C7orf10	NA	1.6908	1.1371	1.2518	0.0032098	0.00101082	0.00140757
PPIAP31	processed_pseudogene	6.2606	-0.71581	-0.50328	0.00323392	0.0156212	0.00452487
PLEKHM1	protein_coding	3.2802	0.74006	0.72433	0.00323803	0.00238495	0.00226836
MASTL	protein_coding	4.6569	-0.75093	-1.27797	0.00325886	3.69e-05	0.00011813
KIAA0101	protein_coding	3.7483	-0.84587	-1.4243	0.00325886	4.62e-05	0.0001452
MYBL1	protein_coding	2.8583	-0.79997	-1.33543	0.00325886	5.08e-05	0.00015695
PRR11	protein_coding	6.0317	-0.725	-0.99073	0.00325886	0.00020455	0.00047185
FAM136A	protein_coding	6.0702	-0.65855	-0.65825	0.00325886	0.00202348	0.00210931
DFNA5	protein_coding	4.5343	0.58249	0.52682	0.00325886	0.00399434	0.00291139
SLC2A1	protein_coding	4.1209	0.621	0.07412	0.00325886	0.682187	0.00298937
PPA1	protein_coding	5.9435	-0.64838	-0.53309	0.00325886	0.00683843	0.00364012
AIF1L	protein_coding	3.1613	-0.97723	-0.76416	0.00325886	0.00894391	0.00395989
RP11-334L9.1	processed_pseudogene	2.542	-0.81522	-0.25	0.00325886	0.24387	0.00474487
ZNF81	protein_coding	3.6919	0.67028	0.43276	0.00325886	0.0259523	0.00507206
ADAMTS1	protein_coding	5.1738	-0.56376	-0.34236	0.00325886	0.0317523	0.00521937
ZNF697	protein_coding	4.6183	0.55058	0.3304	0.00325886	0.0351491	0.0052543
METTL3	protein_coding	4.7211	-0.51778	-0.21933	0.00325886	0.116243	0.00534921
SAR1A	protein_coding	6.1237	-0.511	-0.26861	0.00325886	0.0566652	0.00550429
HSPA14	protein_coding	4.4641	-0.53545	-0.70518	0.00326047	0.00029852	0.00063608
ACADM	protein_coding	5.1483	-0.55065	-0.63396	0.00326745	0.00078062	0.00121836
HIST1H2AE	protein_coding	0.8268	-1.17065	-2.10577	0.00326814	6.09e-05	0.00018003
GGH	protein_coding	5.7267	-0.65677	-1.01135	0.00326814	7.9e-05	0.00022253
NCAPG2	protein_coding	4.8922	-0.77301	-1.31307	0.00328692	3.81e-05	0.00012287
MLH1	protein_coding	5.2527	-0.5069	-0.61078	0.0032882	0.00056599	0.00099832
HIST1H1C	protein_coding	3.6826	-0.79451	-2.2057	0.00328867	1.23e-06	3.99e-06
TES	protein_coding	5.4666	0.49954	0.13475	0.00328867	0.321004	0.00442831
RANP1	processed_pseudogene	5.9625	-0.64201	-0.78143	0.00329089	0.00051002	0.00093386
USP36	protein_coding	5.2552	0.525	0.13052	0.00329089	0.362831	0.00426233
BTG3	protein_coding	4.0827	-0.58389	-0.68009	0.00330454	0.00076402	0.00120691
DYRK3	protein_coding	3.1146	0.69997	0.20597	0.00330454	0.287462	0.00464371
PHF17	NA	5.237	-0.49257	-0.58663	0.003307	0.00062012	0.00106676
LRRC8D	protein_coding	5.1245	-0.50731	-0.47322	0.003307	0.00333313	0.00272637
ABHD4	protein_coding	4.5766	0.66459	0.34857	0.003307	0.061891	0.00564474
UCHL5	protein_coding	5.6555	-0.56304	-0.77374	0.0033089	0.00020472	0.00047703
TPM1	protein_coding	8.5559	-0.44196	0.07958	0.0033089	0.511663	0.00106074
STK32B	protein_coding	3.6614	0.68507	0.65975	0.0033089	0.00276753	0.00250241
PPIL1	protein_coding	4.4538	-0.58841	-0.77016	0.00332586	0.00032412	0.00067885
PSMG1	protein_coding	5.8448	-0.59195	-0.85191	0.00332955	0.00013639	0.00035608
HSPA4L	protein_coding	4.4593	0.64952	0.16755	0.00332955	0.350782	0.00441316
DARS2	protein_coding	4.9945	-0.6098	-0.75184	0.00334099	0.00050677	0.00093435
C12orf5	NA	4.1769	0.57478	0.66396	0.00334239	0.00076402	0.00121607
CCNE1	protein_coding	2.1002	-0.98642	-0.8951	0.00334239	0.00422581	0.00307821
SEC23A	protein_coding	6.2296	-0.49343	-0.24869	0.00334239	0.0675628	0.00573803
FAM21B	NA	5.291	0.49061	0.26959	0.00335608	0.0512975	0.00571559
KIAA1841	protein_coding	4.377	-0.56867	-0.0368	0.00337471	0.825895	0.00272509
PLS1	protein_coding	0.5055	-1.04988	-1.79759	0.00338418	7.5e-05	0.00021817
CXorf36	protein_coding	3.8723	-0.82388	0.39818	0.00338418	0.0687181	0.00024943
PI4K2B	protein_coding	4.3324	-0.65393	-0.68828	0.00338418	0.00158295	0.00191684
RP11-153M3.1	processed_pseudogene	4.1435	-0.65165	-0.91886	0.00339113	0.00019496	0.00046204
ANKZF1	protein_coding	3.2593	0.7967	0.79736	0.00339113	0.00222038	0.00227136
CALCOCO1	protein_coding	4.3986	0.62684	0.75289	0.00340281	0.0005823	0.00103997
XRCC5	protein_coding	8.71	-0.49341	-0.55029	0.00340536	0.00097867	0.00143408
PDE3B	protein_coding	1.6844	-0.91552	-0.75317	0.00340797	0.00757099	0.00391335
GMPSP1	processed_pseudogene	2.8888	-0.75016	-0.72248	0.00341791	0.00295735	0.00264634
ALS2CL	protein_coding	1.8976	0.87494	0.85841	0.00341899	0.00255491	0.00247338
FBXL18	protein_coding	2.4134	0.78676	0.68127	0.00341899	0.00573081	0.0035702
TRIO	protein_coding	8.132	0.49792	0.4859	0.00343464	0.00247543	0.00243494
TXNDC16	protein_coding	2.5616	-0.82576	-0.97271	0.00343882	0.00077735	0.00125363
RFC3	protein_coding	4.1302	-0.65136	-1.71238	0.00345551	1.62e-06	4.87e-06
HLA-B	protein_coding	4.8634	0.65644	0.486	0.00346493	0.0135893	0.00476691
TSPAN11	protein_coding	2.042	0.76239	1.15347	0.00347344	8.48e-05	0.00023953
FOXO1	protein_coding	6.1178	0.55939	0.39067	0.00349312	0.01793	0.00513577
RNF167	protein_coding	3.9053	0.60823	0.37554	0.00351387	0.0337722	0.00575537
FKBP11	protein_coding	3.3408	-0.61417	-0.31054	0.00352709	0.068572	0.00603451
YPEL3	protein_coding	2.2232	0.84884	0.96851	0.0035286	0.00090216	0.00138762
TRAF4	protein_coding	1.9913	0.86879	0.77167	0.0035286	0.00503486	0.0034509
APOBEC4	protein_coding	0.663	1.14829	0.98851	0.0035286	0.00630098	0.00377293
MST1	protein_coding	-0.239	1.25633	1.63922	0.00352935	0.00029852	0.00065546
RNF219	protein_coding	3.664	-0.62166	-1.00383	0.00357053	7.05e-05	0.00020936
DOCK10	protein_coding	6.6107	-0.53131	-0.29423	0.00357053	0.0496337	0.00603764
AMPH	protein_coding	1.9604	-0.86676	-0.64872	0.00359149	0.0129801	0.00485113
EMCN	protein_coding	5.9381	-0.52655	-0.1771	0.00360009	0.215991	0.0055374
BRCA2	protein_coding	4.6961	-0.69684	-1.81449	0.00360854	1.71e-06	5.19e-06
HIST1H2AK	protein_coding	0.8048	-0.84201	-1.7842	0.00361524	1.53e-05	5.32e-05
ORC6	protein_coding	4.3011	-0.87588	-1.55975	0.00362008	3.27e-05	0.00010917
AHSA2	protein_coding	4.4109	0.53685	0.7766	0.00363041	0.00013409	0.00035905
SIPA1L2	protein_coding	4.0131	0.56897	0.56148	0.00365413	0.00260078	0.00258715
SSR3	protein_coding	8.2132	-0.47914	-0.17027	0.00366636	0.193744	0.00576036
RUNDC3B	protein_coding	1.0333	-0.95723	-1.0993	0.0036792	0.0011075	0.00160841
SPC25	protein_coding	2.8372	-1.27155	-2.26433	0.00368197	4.89e-05	0.00015412
SUPT16H	protein_coding	6.9258	-0.47678	-0.76315	0.00368197	6.15e-05	0.00018437
VAT1	protein_coding	7.092	0.47623	0.52935	0.00368197	0.00109139	0.00160083
KIAA0556	protein_coding	3.3901	0.66101	0.49678	0.00368197	0.0137478	0.00502729
NFKB2	protein_coding	1.1306	0.95586	0.57178	0.00368197	0.0426432	0.0061486
LHFP	protein_coding	4.2771	-0.53374	-0.18479	0.00368678	0.204818	0.00575673
TOB1	protein_coding	3.4429	0.69491	1.06178	0.00371042	8.66e-05	0.00024544
ICMT	protein_coding	5.9827	-0.48177	-0.59616	0.00371042	0.00052537	0.00099444
GCSHP5	processed_pseudogene	2.3029	-0.69057	-0.76434	0.00371042	0.00132883	0.00182095
CCT6P2	processed_pseudogene	4.1156	-0.62845	-0.67333	0.0037436	0.00158904	0.00203189
EBNA1BP2	protein_coding	6.6754	-0.49371	-0.62774	0.00375076	0.00041643	0.00086796
RP3-412A9.10	NA	1.0457	0.94048	1.18392	0.00375076	0.00044682	0.00090479
MIR4435-1HG	NA	5.9595	-0.55181	-0.19294	0.00379936	0.202529	0.00593375
PPA2	protein_coding	4.3169	-0.55215	-0.15084	0.00380243	0.318146	0.00529791
KDM6B	protein_coding	3.1625	0.78039	0.65381	0.00381039	0.0076841	0.00427656
PTTG3P	processed_pseudogene	2.4099	-0.91396	-1.24352	0.00383161	0.00034119	0.00073929
UBR7	protein_coding	4.2976	-0.70683	-0.99012	0.00383347	0.00023681	0.00056501
KCTD13	protein_coding	2.6198	0.7788	0.87958	0.00385485	0.00107124	0.00160736
CCNB2	protein_coding	5.1611	-0.9034	-1.35525	0.00387441	0.00013349	0.0003612
COPB2	protein_coding	8.1198	-0.50017	-0.25916	0.00388354	0.0664712	0.00667672
ZNF511	protein_coding	2.1734	-0.73248	-0.56057	0.00390075	0.0124909	0.00509955
MSRB3	protein_coding	5.7188	-0.46361	-0.16103	0.00390462	0.207934	0.00604714
LDHAP2	processed_pseudogene	0.8585	-0.88422	-0.8147	0.00391748	0.00467808	0.00358891
HSPD1P1	processed_pseudogene	5.9891	-0.57093	-0.89561	0.00392747	8.26e-05	0.0002384
TPM3	protein_coding	9.6226	-0.46588	-0.41406	0.00392747	0.00507945	0.00372378
ZC3H3	protein_coding	2.4278	0.73913	0.41382	0.00392747	0.0553736	0.00670172
EXOSC2	protein_coding	3.7235	-0.6966	-0.83608	0.00393008	0.00078229	0.00133976
HN1L	protein_coding	5.7779	-0.57499	-0.57852	0.00394281	0.00242533	0.00260725
SFXN1	protein_coding	4.8081	-0.51605	-0.41882	0.00394296	0.00897845	0.00465476
ENKUR	protein_coding	0.6767	1.58791	1.91596	0.00394856	0.0006312	0.00116314
RBL1	protein_coding	5.2218	-0.65942	-1.20555	0.00394953	2.54e-05	8.63e-05
CTC-308K20.3	processed_pseudogene	3.6836	-0.67169	-0.6205	0.00395033	0.00439502	0.0035038
MGRN1	protein_coding	4.6157	0.56812	0.62181	0.00396483	0.00136482	0.0019066
NME1	protein_coding	4.9972	-0.78562	-0.48258	0.00396483	0.0347464	0.00646951
SCML1	protein_coding	3.6127	-0.64873	-0.84241	0.00396759	0.00044682	0.00091919
RP11-305M3.2	processed_pseudogene	3.5726	-0.7087	-0.5481	0.00396759	0.0118819	0.00512171
CLIP3	protein_coding	3.7223	0.80713	1.43758	0.00397192	2.29e-05	7.93e-05
MAPK8IP3	protein_coding	3.0476	0.7575	1.29136	0.00397959	3.38e-05	0.00011291
STAG1	protein_coding	5.6011	-0.56131	-0.80514	0.00399767	0.00018974	0.00047114
SPAG1	protein_coding	3.056	-0.6262	-0.68739	0.00403102	0.0014716	0.00201866
GS1-309P15.4	processed_pseudogene	3.2284	-0.73941	-0.68685	0.00403682	0.00435638	0.0035405
SLC8A1	protein_coding	1.2016	-0.87744	-1.27415	0.00405558	0.00025791	0.00061461
AURKB	protein_coding	3.7912	-1.02715	-1.84946	0.00406022	4.14e-05	0.00013659
SULT1B1	protein_coding	3.4484	-0.83693	-0.84358	0.00406742	0.00268123	0.00278491
ASCC3	protein_coding	8.0878	0.54011	0.29883	0.00408597	0.0543192	0.00694327
AC098614.2	processed_pseudogene	6.941	-0.5149	-0.37231	0.00408674	0.0167187	0.00575325
PM20D2	protein_coding	4.2322	-0.57144	-0.41497	0.00409997	0.0168491	0.00577084
ZNF160	protein_coding	3.9591	0.59456	0.69328	0.00410967	0.00091741	0.00150056
NPM1P46	processed_pseudogene	2.4902	-0.82783	-1.3854	0.00411846	7.25e-05	0.00021852
RP11-54D18.4	processed_pseudogene	3.5197	-0.65234	-1.0597	0.00411846	8.38e-05	0.00024279
CLN8	protein_coding	3.4154	0.60548	0.68287	0.00413869	0.00117606	0.00177484
TFRC	protein_coding	7.5337	-0.50672	-0.805	0.00415709	7.52e-05	0.00022307
KCNMA1	protein_coding	0.0611	1.42258	1.77488	0.00418878	0.00053161	0.00105003
EPS8L2	protein_coding	-0.4699	1.56037	1.60276	0.00418878	0.00231151	0.00261855
NCL	protein_coding	10.6808	-0.46012	-0.71122	0.00420835	9.4e-05	0.00027298
GFOD1	protein_coding	4.4742	-0.52938	-0.07929	0.00421484	0.603167	0.00446461
LRP1	protein_coding	1.0362	1.04799	1.71079	0.00424649	5.28e-05	0.00016771
TRIP6	protein_coding	5.0152	0.65773	0.23816	0.00425776	0.202714	0.00673176
TMEM106C	protein_coding	4.7958	-0.75081	-1.19282	0.00426505	9.75e-05	0.00028124
MAGED1	protein_coding	7.2255	-0.5413	0.13381	0.00426505	0.378888	0.00107755
NDUFB2	protein_coding	5.7046	-0.57113	-0.20761	0.00426505	0.194099	0.00678893
VIP	protein_coding	0.2695	1.58844	2.03739	0.00426609	0.00042927	0.00091682
TYMS	protein_coding	5.7346	-0.69267	-1.03034	0.00426627	0.00015052	0.00040342
SLC26A11	protein_coding	2.0549	0.95672	0.79514	0.00429425	0.00901471	0.00498373
C9orf9	protein_coding	0.5331	1.07639	0.8992	0.00432148	0.00898266	0.00499379
FAM120C	protein_coding	2.5871	-0.67117	-0.03113	0.00432956	0.880039	0.00338671
TRPC4	protein_coding	0.808	-1.04492	-0.4958	0.00433269	0.0894058	0.00735541
TNIP1	protein_coding	4.849	0.54322	0.44229	0.00433779	0.00980488	0.00514165
FUCA1	protein_coding	2.3145	0.77985	1.20982	0.00434145	9.15e-05	0.00026766
GPSM2	protein_coding	3.5735	-0.75139	-1.30053	0.0043695	5.52e-05	0.00017449
PLXNB3	protein_coding	0.5497	1.36263	1.78783	0.0043695	0.00036369	0.00081488
AGTRAP	protein_coding	2.7359	0.68175	0.56466	0.0043695	0.00927334	0.00507263
RP11-39C10.1	processed_pseudogene	2.4154	-0.76867	-0.26717	0.00438286	0.211095	0.00688641
ZNF761	protein_coding	3.7728	0.63091	0.28304	0.00440059	0.122001	0.00736006
SERPINB1	protein_coding	4.1382	0.631	0.25552	0.0044134	0.161279	0.00719825
ERBB2	protein_coding	2.7639	0.65667	0.58276	0.00441394	0.00630032	0.00440032
SORL1	protein_coding	-0.2498	1.90935	2.38882	0.00443	0.00054306	0.00107996
SRSF3	protein_coding	8.2361	-0.62972	-0.87967	0.00443157	0.00024034	0.00060001
TRANK1	protein_coding	3.4919	0.66897	0.87713	0.00443157	0.00040582	0.00089323
KLHL23	protein_coding	2.9309	-0.73327	-0.91142	0.00443157	0.00072052	0.00132651
TNFRSF10A	protein_coding	3.2763	0.66217	0.5569	0.00443157	0.00860266	0.00501368
SLC38A7	protein_coding	4.2579	0.61972	0.50764	0.00444279	0.00984195	0.00524185
SYNE1	protein_coding	6.4526	0.46076	0.25292	0.0044506	0.0592519	0.00752888
NEIL3	protein_coding	3.4293	-0.88658	-1.75096	0.00446173	2.09e-05	7.36e-05
MTHFSD	protein_coding	2.5018	0.71573	0.59616	0.00454075	0.00926462	0.00520823
SRP9	protein_coding	7.3447	-0.67436	-0.80702	0.00457618	0.00083067	0.00146748
CBX1	protein_coding	6.9952	-0.50323	-0.63875	0.00460051	0.00054076	0.00108845
BUD13	protein_coding	4.0092	-0.63199	-0.66357	0.00461182	0.00229969	0.00272776
TSKU	protein_coding	2.9632	0.72242	0.80674	0.00461389	0.00140819	0.00208293
BBC3	protein_coding	-0.2254	1.30253	1.34719	0.00461744	0.00243419	0.00282814
EPHX1	protein_coding	2.106	0.80632	0.65244	0.00461744	0.0112291	0.0056117
RHBDD2	protein_coding	3.7098	0.61519	0.43517	0.00461744	0.0221699	0.00678893
TRIM32	protein_coding	5.1645	0.48013	0.3749	0.00464337	0.0129981	0.00590304
IER3IP1	protein_coding	4.2608	-0.61224	-0.64098	0.00467197	0.00235216	0.00277886
GNPNAT1	protein_coding	4.3704	-0.55194	-0.59483	0.00475818	0.00196315	0.00254581
LMO2	protein_coding	5.4226	-0.52635	-0.03052	0.00475818	0.852907	0.00385465
RHBDF1	protein_coding	3.61	0.73329	1.00649	0.00476491	0.00030083	0.00070914
JDP2	protein_coding	-0.1179	1.45491	0.78883	0.00476491	0.0738257	0.00803127
NABP1	protein_coding	6.2924	0.50495	0.8415	0.00476967	5.92e-05	0.00018437
PER2	protein_coding	2.7082	0.67894	-0.47036	0.0048136	0.031602	0.00020472
SNRPFP1	processed_pseudogene	2.6856	-0.83927	-0.65881	0.00483535	0.0128149	0.00601514
BRIP1	protein_coding	4.2429	-0.80332	-1.76225	0.0048422	9.26e-06	3.28e-05
WDHD1	protein_coding	5.9276	-0.64702	-1.35998	0.00486434	9.94e-06	3.46e-05
RP5-1099D15.1	processed_pseudogene	1.2766	-0.83938	-1.1061	0.00486434	0.00061895	0.00121607
RAB27A	protein_coding	4.2063	-0.56373	-0.47475	0.00487552	0.00888857	0.00536951
CDC25C	protein_coding	2.7635	-0.91188	-1.468	0.00489662	0.00012481	0.00035203
BCL2L1	protein_coding	5.354	0.51073	0.49294	0.00490413	0.00392905	0.00377978
ZNF274	protein_coding	3.378	0.63756	0.47769	0.00490413	0.0175183	0.00670745
NRP2	protein_coding	7.7601	0.49946	0.83114	0.00493456	6.29e-05	0.00019428
PSMC3IP	protein_coding	1.3414	-0.82174	-1.36589	0.00493456	0.00011792	0.00033871
ZFHX2	protein_coding	0.3174	1.1502	1.39964	0.00493456	0.0007649	0.00142765
CENPL	protein_coding	3.2474	-0.75979	-1.29888	0.00493876	7.2e-05	0.00022009
FOXF1	protein_coding	0.8504	0.91631	0.53539	0.00495744	0.0563012	0.00822509
ANXA6	protein_coding	5.5897	-0.50205	0.08883	0.00497813	0.545944	0.00171316
ENY2	protein_coding	6.1729	-0.47099	-0.62481	0.00498896	0.00043585	0.00096072
HSPD1	protein_coding	8.5756	-0.56467	-0.87937	0.00499516	0.00011202	0.000327
SEC61G	protein_coding	5.9598	-0.64814	-0.26576	0.00499516	0.153975	0.00814596
CENPK	protein_coding	3.2638	-0.80996	-1.61022	0.00501182	2.14e-05	7.49e-05
SLC47A1	protein_coding	3.0278	0.69144	0.02204	0.00503443	0.926644	0.00376553
NUP35	protein_coding	2.4963	-0.6719	-1.20261	0.00506638	5.37e-05	0.00017359
SERBP1P6	processed_pseudogene	3.48	-0.72532	-0.67694	0.00506875	0.0051753	0.00440171
RASSF8	protein_coding	6.3978	0.55188	0.15856	0.00506875	0.320438	0.00714677
TBC1D3F	protein_coding	1.2954	0.83267	0.53409	0.00506875	0.0383681	0.00803179
PTGES3	protein_coding	6.5568	-0.55875	-0.78442	0.00516523	0.00028897	0.00069658
GPR108	protein_coding	3.7991	0.6296	0.44724	0.00516573	0.0233215	0.00740402
RP5-1070A16.1	lincRNA	1.5921	-0.92618	-0.35812	0.00517356	0.172731	0.00830359
SLC6A8	protein_coding	4.0248	0.59564	0.74823	0.00517677	0.00067027	0.00132842
SLC6A4	protein_coding	-0.0375	1.25876	1.53283	0.00517677	0.0008296	0.00153027
RP4-717I23.3	processed_transcript	1.5998	0.841	1.67118	0.00518076	1.21e-05	4.12e-05
LBR	protein_coding	5.9007	-0.51926	-0.64458	0.0052175	0.0007649	0.00144982
ZNF383	protein_coding	2.1207	0.78216	0.56255	0.0052175	0.022673	0.00742252
RP11-660L16.2	antisense	1.5163	-0.8812	-0.41783	0.00526584	0.100784	0.00881348
RP11-1148L6.5	antisense	4.2524	-0.53883	-0.37675	0.00531031	0.0243639	0.00762082
NASP	protein_coding	6.8872	-0.56011	-0.87926	0.00531852	0.0001147	0.00033694
CBR3	protein_coding	0.4101	-0.94032	-1.10825	0.00533259	0.00144553	0.00224278
NDUFAF3	protein_coding	4.1063	-0.52844	-0.4424	0.00533259	0.00991536	0.00592093
NRCAM	protein_coding	7.5019	0.46224	0.35848	0.00533534	0.0145033	0.00674117
SNRPD3	protein_coding	5.6746	-0.5714	-0.52	0.00533876	0.00607694	0.00487043
PNPLA2	protein_coding	2.6189	0.69033	0.61419	0.00534174	0.00732362	0.0052535
PMP22	protein_coding	6.7717	0.44819	0.16993	0.00537905	0.192925	0.00848781
RDX	protein_coding	7.8234	-0.48341	-0.66528	0.00539424	0.00034539	0.00083342
CHAC2	protein_coding	2.456	-0.86661	-1.22041	0.00539424	0.00038939	0.0009111
SLBP	protein_coding	5.403	-0.50685	-0.58886	0.00539424	0.00129646	0.00209544
SRGAP1	protein_coding	5.77	0.5056	0.38845	0.00539437	0.0156291	0.00694593
SMC3	protein_coding	6.8425	-0.48924	-1.08358	0.00540301	6.49e-06	2.29e-05
ZNF385A	protein_coding	0.9638	0.90973	0.82203	0.00540667	0.00691499	0.00519507
ZBTB48	protein_coding	1.9878	0.79756	0.66984	0.00541421	0.0103515	0.00605826
LMAN1	protein_coding	7.4746	-0.46037	-0.32649	0.00541421	0.022673	0.00764103
SDF2L1	protein_coding	2.2316	-0.87041	-0.34304	0.00541421	0.171036	0.00873292
FADS3	protein_coding	4.8438	0.62594	0.81779	0.00542379	0.00052766	0.00112468
RP11-310J24.3	sense_intronic	-0.0948	1.45298	1.60578	0.00542379	0.00179992	0.00258713
FKBP7	protein_coding	3.0967	-0.65633	0.01033	0.00542379	0.961756	0.00349778
EIF5AL1	protein_coding	4.1347	-0.53444	-0.46896	0.00542379	0.00786091	0.00550429
NXT1	protein_coding	2.8324	-0.66021	-0.75485	0.00544836	0.00158295	0.00240196
MBD1	protein_coding	4.9958	0.45827	0.28106	0.00545815	0.0451553	0.00879397
C15orf52	protein_coding	3.2376	0.65333	1.04462	0.00546434	9.75e-05	0.00029065
CCT5P2	processed_pseudogene	1.8562	-0.7907	-0.99677	0.00546434	0.00090081	0.00164452
AKAP8L	protein_coding	2.7558	0.70975	0.33188	0.00549005	0.121355	0.0091715
MMRN1	protein_coding	9.3398	-0.61625	-0.27099	0.00552518	0.133609	0.00916639
KHNYN	protein_coding	4.5268	0.49679	0.34485	0.00552567	0.0270652	0.00812499
ZNF844	protein_coding	0.3983	1.03668	0.83534	0.00553239	0.0137449	0.00682226
ZBTB21	protein_coding	4.881	0.50831	-0.04391	0.00553639	0.791322	0.00277688
KIAA1683	protein_coding	-0.3893	1.81595	1.56324	0.00555407	0.00931978	0.00596844
ATP5L	protein_coding	5.7518	-0.63132	-0.46349	0.00556664	0.0198857	0.00757406
SPINT1	protein_coding	1.0036	0.86851	0.81201	0.00559066	0.00592634	0.00499045
RCC2	protein_coding	5.576	-0.47351	-0.3746	0.00559066	0.0138822	0.0068881
PRIM1	protein_coding	2.7882	-0.7852	-1.72726	0.00560278	1.29e-05	4.43e-05
COQ3	protein_coding	2.6697	-0.78763	-1.05744	0.00560278	0.00055916	0.0011788
CREBRF	protein_coding	3.4206	0.90689	0.36874	0.00560529	0.177183	0.00905277
ATAT1	protein_coding	3.0612	0.72445	1.2205	0.00563632	6.39e-05	0.00020236
PAQR6	protein_coding	0.1045	1.19926	1.41468	0.00565402	0.00117232	0.00201285
NCBP1	protein_coding	6.4184	-0.4464	-0.52077	0.00565402	0.00127667	0.00211906
MT-TN	Mt_tRNA	0.4557	-0.87846	0.00194	0.00565402	0.994426	0.00383632
RANBP10	protein_coding	4.3236	0.49953	0.37766	0.00568389	0.0184394	0.00755724
RGS4	protein_coding	5.9962	-0.60962	-0.92936	0.00573525	0.00017617	0.00047871
CNRIP1	protein_coding	5.6059	-0.45515	-0.60311	0.00573918	0.00054076	0.00116521
RP11-443P15.2	transcribed_unprocessed_pseudogene	1.0279	0.9806	1.26489	0.00581765	0.00062896	0.00132025
STX2	protein_coding	5.6221	-0.44816	-0.36367	0.00581765	0.0125165	0.00683388
TMEM63B	protein_coding	3.7267	0.62914	0.83611	0.00582191	0.00050801	0.00111602
THSD1	protein_coding	3.5899	0.56959	0.44942	0.00584185	0.015331	0.00726556
CTD-2267D19.6	NA	0.4932	-1.31591	-1.96325	0.00585248	0.00040582	0.00095532
TMEM198B	unitary_pseudogene	1.9283	0.85849	1.17055	0.00587954	0.00040698	0.00095929
HMGB3	protein_coding	6.0232	-0.74012	-0.91399	0.00587954	0.00092789	0.00173202
RP11-553A10.1	lincRNA	0.7152	1.18832	1.34928	0.00587954	0.0015693	0.00246619
EXOC6	protein_coding	6.6219	-0.54104	-0.51139	0.00587954	0.00520466	0.00483537
2017-03-08	protein_coding	4.2695	0.51389	0.2828	0.00587954	0.0721739	0.0097898
ATPIF1	protein_coding	4.947	-0.57831	-0.26494	0.00593586	0.123044	0.00985837
KNSTRN	protein_coding	4.6549	-0.78934	-1.14492	0.00595062	0.00031761	0.00079058
SKA1	protein_coding	4.7418	-0.72389	-1.95929	0.00595442	2.19e-06	7.05e-06
CCT5	protein_coding	8.1656	-0.55287	-0.67046	0.00596032	0.00101965	0.00184819
KLRG1	protein_coding	-0.0292	-1.04079	-0.0903	0.00596032	0.77414	0.00542485
SNRPF	protein_coding	4.0031	-0.7061	-0.63296	0.00596032	0.00759851	0.00575325
HECTD4	protein_coding	5.944	0.45347	0.61446	0.00598056	0.00044682	0.00103455
RASGRP3	protein_coding	4.6876	-0.62627	0.2169	0.00598056	0.232717	0.00103748
CUTA	protein_coding	5.24	-0.62709	-0.04685	0.00598056	0.816677	0.00520823
TSC1	protein_coding	5.3131	0.45849	0.28392	0.00598056	0.0457892	0.00954181
RP1-239B22.5	antisense	3.4834	-0.64753	-0.30659	0.00598056	0.111491	0.0100002
PITPNM1	protein_coding	1.0772	0.89939	0.83641	0.00598915	0.00634185	0.00534921
RP11-132A1.4	antisense	0.6262	-0.96349	-1.37471	0.00600468	0.00050579	0.00111842
RP11-693N9.2	transcribed_unprocessed_pseudogene	2.6619	-0.88812	-0.16117	0.00605053	0.541985	0.00701573
BLM	protein_coding	4.3757	-0.72821	-1.59021	0.00605484	1.25e-05	4.24e-05
FBXO43	protein_coding	0.727	-1.241	-1.80321	0.00606004	0.0004605	0.00105726
ILF2	protein_coding	7.5872	-0.52403	-0.58855	0.00606089	0.00176754	0.00269782
MRPL18	protein_coding	5.0605	-0.56089	-0.79613	0.00606852	0.00035981	0.00088725
DHCR7	protein_coding	5.3534	-0.57969	0.09102	0.00606852	0.606446	0.00233744
PPIAP29	processed_pseudogene	3.7406	-0.61579	-0.67372	0.00606852	0.00237588	0.00321034
RAN	protein_coding	8.3268	-0.62208	-0.73296	0.00608657	0.00127458	0.00219151
NDUFA6	protein_coding	4.8174	-0.58984	-0.48303	0.00609795	0.0125876	0.00710243
PLK1	protein_coding	4.6936	-0.82877	-1.51356	0.00609993	5.41e-05	0.00017626
C12orf57	protein_coding	3.044	-0.67205	-0.60409	0.00609993	0.00778642	0.00592292
RP11-23P13.6	antisense	3.9717	-0.52611	-0.07572	0.00609993	0.641722	0.00645607
ZNF337	protein_coding	0.557	1.13106	0.86218	0.0061008	0.0199681	0.00819211
PSMD1	protein_coding	8.0485	-0.44274	-0.51083	0.00610637	0.00147005	0.00241607
ZNF677	protein_coding	4.0306	0.56997	0.43625	0.00615158	0.0186411	0.00807124
GIGYF1	protein_coding	2.479	0.76448	0.74193	0.00617303	0.00495591	0.00487449
TUBG1	protein_coding	4.3649	-0.52317	-0.69671	0.00618942	0.00061295	0.00132025
C5orf45	protein_coding	2.2271	0.8728	0.85396	0.00618942	0.00470877	0.00476203
KIAA1432	NA	5.3077	0.47935	0.3029	0.00618942	0.0434286	0.0097898
CBX3P9	processed_pseudogene	3.2639	-0.59931	-0.69613	0.00619771	0.00164919	0.00261855
CACNA2D1	protein_coding	5.0183	-0.46076	-0.36367	0.00619771	0.0154555	0.00765713
JAK3	protein_coding	0.5767	1.18525	1.04015	0.0062257	0.00936325	0.00650129
RP11-473N11.2	processed_pseudogene	4.1632	-0.5044	-0.84881	0.0062293	0.0001	0.00030294
RP11-264C15.2	NA	-0.5898	1.40182	1.80865	0.00626896	0.00066578	0.00140568
TMEM150A	protein_coding	2.0623	0.73218	0.97993	0.00627597	0.00052704	0.00116612
MAU2	protein_coding	4.4041	0.52859	0.44209	0.00628155	0.0118819	0.007106
ALAS1	protein_coding	5.2951	0.50231	0.2694	0.00628155	0.0804766	0.0105553
TACC3	protein_coding	4.8653	-0.67274	-1.13526	0.00628804	9.8e-05	0.00029788
SLC39A8	protein_coding	2.536	-0.78305	-0.73182	0.00628804	0.00648677	0.00559036
ARL3	protein_coding	4.5209	-0.64936	-0.3566	0.00632572	0.0716517	0.0105828
MT-CO3	protein_coding	11.4717	-0.4754	-0.25169	0.00632572	0.0814152	0.0106307
PORCN	protein_coding	2.5174	0.77985	0.59352	0.00633	0.0201185	0.00846554
BCAP29	protein_coding	6.2131	-0.44356	-0.36198	0.0063331	0.0130267	0.00736006
KIAA0195	protein_coding	3.8982	0.57647	0.54637	0.00635099	0.00589979	0.00538376
TTF2	protein_coding	4.9603	-0.53613	-0.75634	0.00640307	0.00040698	0.00097956
DRAM1	protein_coding	5.3651	0.53561	0.39086	0.00640307	0.0235679	0.00892405
ZNF213	protein_coding	1.3402	0.97918	0.72246	0.00640307	0.0236007	0.00892405
HMGN1	protein_coding	6.1842	-0.44198	-0.53508	0.00642115	0.00116148	0.00209756
RBM3	protein_coding	8.3491	-0.51876	-0.32555	0.00647775	0.0442202	0.010204
BZW2	protein_coding	5.5964	-0.42771	-0.42025	0.00648002	0.00468245	0.0048755
G2E3	protein_coding	4.6071	-0.50628	-0.99447	0.00650927	2.82e-05	9.92e-05
RAD21	protein_coding	7.2181	-0.58778	-0.96307	0.00650927	0.00010795	0.00032871
RIBC2	protein_coding	0.1231	-1.22194	-2.26073	0.00650927	0.00011421	0.00034284
RP1-283E3.4	transcribed_processed_pseudogene	3.4809	0.69602	0.82288	0.00650927	0.00138635	0.00238578
EID1	protein_coding	7.2872	-0.51888	-0.4404	0.00650927	0.0107106	0.00701703
NPM1P6	processed_pseudogene	4.9367	-0.49442	-0.82062	0.00653206	0.00011257	0.00033871
MRPL48	protein_coding	3.9141	-0.67713	-0.51892	0.00655	0.0188526	0.00851877
GSDMC	protein_coding	2.7844	-0.62552	-0.27246	0.00655347	0.147709	0.0108927
ENOPH1	protein_coding	5.4039	-0.45999	-0.68999	0.0065627	0.00025075	0.00066933
MOK	protein_coding	1.2099	0.94406	0.42567	0.00657834	0.151184	0.0109021
ETFA	protein_coding	5.4066	-0.51802	-0.21951	0.00661656	0.160123	0.0109015
C3orf67	protein_coding	2.5804	0.70632	0.04065	0.00664181	0.868459	0.00551032
COX16	protein_coding	2.8506	-0.64445	-0.20142	0.0066455	0.29565	0.0097898
GMFG	protein_coding	3.294	-0.76109	-0.09671	0.00670238	0.685454	0.00683148
CNTRL	protein_coding	5.3087	-0.5422	-0.99553	0.00670726	5.06e-05	0.00016767
MBOAT1	protein_coding	2.1286	-0.8963	-1.09598	0.00671014	0.00136565	0.00239155
RPP40	protein_coding	2.2588	-0.67886	-0.67546	0.00671014	0.0048358	0.00506164
RP11-448G15.3	sense_overlapping	4.005	0.53404	0.45113	0.00671014	0.0120268	0.00743829
BMP4	protein_coding	5.2625	-0.55288	-0.153	0.00671014	0.358828	0.00931451
BRI3BP	protein_coding	3.1626	-0.56838	-0.79047	0.00672183	0.00052128	0.00117498
DIAPH3	protein_coding	6.0525	-0.73495	-1.21893	0.00678342	0.00011421	0.00034385
LSM3	protein_coding	4.085	-0.51662	-0.8019	0.00678342	0.00021775	0.00060413
MAPKBP1	protein_coding	3.8693	0.58244	0.61462	0.00678342	0.00321884	0.00404362
PTPRE	protein_coding	6.6908	0.41951	0.48304	0.00685315	0.00171522	0.00277688
ERH	protein_coding	3.6132	-0.77871	-0.74293	0.00685315	0.00614603	0.00572647
VDAC1	protein_coding	8.3258	-0.45253	-0.41868	0.00685315	0.00688151	0.00601614
PLCXD2	protein_coding	0.3135	1.08909	0.86248	0.00685315	0.0181292	0.00869786
CCDC80	protein_coding	4.2055	-0.60781	-0.18231	0.00695565	0.319039	0.00999493
ZSWIM8	protein_coding	4.1041	0.57687	0.50571	0.00695904	0.0100296	0.00713565
FAM20A	protein_coding	1.0402	0.93176	0.87892	0.00699696	0.00680841	0.00603922
RPL9P8	NA	3.9583	-0.6345	-0.3665	0.00703372	0.0636774	0.0114204
FJX1	protein_coding	4.0865	-0.53401	-0.34261	0.00705413	0.0434286	0.0109336
ADAMTS18	protein_coding	4.4692	0.55768	0.67292	0.00706692	0.00131422	0.0023642
PRIM2	protein_coding	4.2697	-0.63134	-1.03457	0.00711839	0.00015251	0.00044617
COX8A	protein_coding	4.2056	-0.57007	-0.34876	0.00711839	0.0525031	0.0112839
RAD18	protein_coding	5.043	-0.51455	-1.12044	0.00712562	1.33e-05	4.49e-05
SPC24	protein_coding	3.5878	-1.21676	-1.56811	0.00712562	0.00104969	0.00201866
INO80C	protein_coding	5.2371	-0.72375	0.04426	0.00712562	0.853641	0.0040176
CD200	protein_coding	0.1862	-1.09684	-0.48161	0.00712928	0.142055	0.0117205
AQP1	protein_coding	-0.9587	-1.92279	-1.22128	0.0071305	0.0414481	0.0109468
HIST1H1E	protein_coding	5.1334	-0.63607	-2.53938	0.00715177	2.7e-07	4.1e-07
CLEC14A	protein_coding	6.6303	-0.42857	0.02403	0.00718275	0.868399	0.00413607
ICT1	protein_coding	4.4405	-0.46504	-0.67492	0.00718613	0.00038647	0.00096072
UAP1	protein_coding	6.6713	-0.53355	-0.66757	0.00718613	0.00103315	0.0020018
PMAIP1	protein_coding	3.9508	0.58234	-0.14195	0.00718613	0.445613	0.0021003
NDUFB6	protein_coding	4.0765	-0.64269	-0.495	0.00718613	0.0197407	0.00921655
RUSC2	protein_coding	5.1275	0.52925	0.41643	0.00725381	0.018143	0.00905553
LBX2-AS1	antisense	0.9935	0.91358	0.40467	0.00725381	0.164507	0.0117773
FKBP3	protein_coding	3.9559	-0.51426	-0.37246	0.00728466	0.0266547	0.0101126
CTD-2027G2.1	processed_pseudogene	0.7834	-0.99689	-1.56434	0.00729977	0.00039868	0.00098737
PSMD14	protein_coding	6.8397	-0.48662	-0.61286	0.00729977	0.00099942	0.00196522
AP5Z1	protein_coding	2.3875	0.83213	0.89521	0.00729977	0.00304387	0.00405363
ZNF441	protein_coding	1.6479	0.77516	0.09999	0.00729977	0.705701	0.0072476
C1GALT1C1	protein_coding	4.0326	-0.60603	-0.58961	0.0073006	0.00583239	0.00578396
HMGN3	protein_coding	4.0912	-0.61046	-0.54273	0.00731244	0.00957646	0.00721492
ATP8B1	protein_coding	6.003	-0.47521	0.02086	0.00734315	0.897612	0.00442831
ZNF418	protein_coding	0.7462	0.98521	1.10232	0.00740949	0.00238191	0.0035405
NEXN	protein_coding	3.8094	-0.63027	-0.86941	0.00741215	0.00060587	0.0013694
NOTCH2NL	protein_coding	5.0596	0.4816	0.37317	0.00751031	0.0201185	0.00956711
SERBP1	protein_coding	8.4397	-0.46351	-0.56322	0.00756133	0.00130975	0.00241327
IMPA2	protein_coding	0.6501	-0.97886	-1.07488	0.00756133	0.00326363	0.00428722
ABCA5	protein_coding	4.1943	0.57706	0.54626	0.00756133	0.00696812	0.00640955
LTBR	protein_coding	4.6359	0.49384	0.44797	0.00756133	0.00879698	0.007106
LSM6	protein_coding	3.3746	-0.62335	-0.94031	0.00757609	0.00032412	0.00086214
RGS12	protein_coding	4.097	0.49597	0.5783	0.00759949	0.00182681	0.00302904
ADD3	protein_coding	5.8128	-0.47695	-0.22705	0.00759949	0.124213	0.0125607
KRT10	protein_coding	2.2485	-0.65975	-0.38265	0.00760456	0.0658569	0.0122927
ACKR3	protein_coding	2.4881	0.57948	0.19119	0.00762062	0.297643	0.0111907
TTLL7	protein_coding	2.8722	-0.59892	-0.65078	0.0076253	0.00318951	0.00425299
WDR27	protein_coding	4.2597	0.49321	0.67256	0.00764511	0.00058905	0.00135155
ARPC2	protein_coding	9.3494	-0.43707	-0.26145	0.00767222	0.0588465	0.012228
FAM124B	protein_coding	4.6976	-0.5361	0.14805	0.00769219	0.364966	0.00188971
VDAC3	protein_coding	6.151	-0.52668	-0.47423	0.00771154	0.00902005	0.0072476
NHP2P1	processed_pseudogene	3.1316	-0.5988	-0.43441	0.00771154	0.0277089	0.0106967
SLC26A4	protein_coding	-0.2634	-1.15784	-0.49437	0.00771154	0.157605	0.0125935
GINS3	protein_coding	3.2101	-0.78764	-1.34142	0.00774304	0.0001421	0.00042513
CHCHD3P3	processed_pseudogene	2.2996	-0.60893	-0.7598	0.00774791	0.00136482	0.00250241
RBCK1	protein_coding	4.4051	0.576	0.4723	0.00775193	0.0157028	0.00905277
HAUS8	protein_coding	3.4255	-0.7516	-1.57825	0.00782969	2.74e-05	9.7e-05
BAZ2A	protein_coding	6.4264	0.39754	0.47429	0.00782969	0.00154461	0.00273338
MPHOSPH9	protein_coding	5.1763	-0.53993	-0.85463	0.00784122	0.00021201	0.00060413
LAMA3	protein_coding	3.7817	-0.61531	-0.8619	0.00786673	0.00060137	0.00137928
MORC4	protein_coding	3.4499	0.55899	0.05731	0.00787047	0.766057	0.00732748
PNO1	protein_coding	4.6205	-0.53932	-0.52643	0.00789234	0.00609779	0.00613849
C4orf27	protein_coding	3.5625	-0.62966	-0.68433	0.00790167	0.00327414	0.00440032
RP11-417L14.1	processed_pseudogene	1.7618	-0.73154	-1.0856	0.00794157	0.00046865	0.0011339
CCDC113	protein_coding	1.2057	0.84984	0.8009	0.00794157	0.00773939	0.006936
KIF26B	protein_coding	0.4094	1.16165	1.31173	0.00795878	0.00239938	0.00367744
ATG9A	protein_coding	5.6432	0.49353	0.2096	0.00800924	0.174837	0.0129296
DLEU2	antisense	2.0401	-0.70314	-1.39753	0.00800958	4.68e-05	0.00015771
RPA3	protein_coding	2.3741	-0.78209	-1.16703	0.00806573	0.00042065	0.00106049
RP11-296E7.1	processed_pseudogene	5.9211	0.41739	0.34294	0.00806573	0.0155465	0.0092304
RHOD	protein_coding	2.0709	0.7747	0.41946	0.00806573	0.0937932	0.0132927
PLXNB1	protein_coding	2.9142	0.76131	1.13593	0.00808605	0.00029859	0.0008048
EVC2	protein_coding	3.2347	0.60224	0.45776	0.00808605	0.0240832	0.0106824
RPS4Y1	protein_coding	0.8477	-0.59733	-0.14968	0.00812987	0.423489	0.0106886
PIK3CD	protein_coding	2.2339	0.66844	0.91268	0.00815983	0.00061895	0.00142964
FOXL1	protein_coding	1.9583	0.79141	0.27294	0.00816622	0.28344	0.0121243
DUSP23	protein_coding	3.7353	-0.59941	-0.47483	0.00817423	0.0191984	0.0100076
CKS1B	protein_coding	3.7067	-0.91939	-1.42271	0.00817977	0.00032815	0.00087869
RAC2	protein_coding	5.0744	0.59256	0.18612	0.00818373	0.31975	0.0117511
MINK1	protein_coding	3.9119	0.55686	0.66613	0.00818841	0.00165527	0.00292384
FTH1P7	processed_pseudogene	4.4333	0.58206	0.61978	0.00818841	0.0036311	0.00477212
KIFC3	protein_coding	3.3148	0.59433	0.28676	0.00818841	0.132264	0.0135307
FOXRED2	protein_coding	3.925	0.53874	-0.06553	0.0082071	0.723263	0.00384969
AC073346.2	NA	4.6864	-0.49114	-0.4035	0.00822272	0.0160575	0.0094919
CDCA8	protein_coding	4.3383	-0.87646	-1.51607	0.00823246	0.00013285	0.00040357
SERPINB8	protein_coding	6.207	-0.39992	-0.37191	0.00823246	0.00803407	0.00718203
FBXO44	protein_coding	1.3389	0.85806	1.2233	0.00826815	0.00044178	0.00109816
CTD-3065B20.1	NA	1.7363	-0.79177	-1.16429	0.00826815	0.00053328	0.00126422
DUOX1	protein_coding	1.286	0.87405	1.16597	0.00826815	0.00074731	0.00164454
GTF2IRD1	protein_coding	3.0245	0.63559	0.43444	0.00826815	0.0394557	0.0122319
DCBLD2	protein_coding	7.6954	0.38957	0.23639	0.00828953	0.0589045	0.0131729
ALDH1A1	protein_coding	7.3378	-0.57457	-0.04244	0.00829965	0.829866	0.0072476
ZNF662	protein_coding	0.0607	1.27094	1.48365	0.00830066	0.00201047	0.00331613
ZNF425	protein_coding	-0.6099	1.36898	1.6643	0.00833662	0.00145629	0.00271369
PRKACB	protein_coding	6.5463	-0.46555	-0.52873	0.00833662	0.00239938	0.00375442
CTB-47B11.3	antisense	-0.3922	1.26481	1.36226	0.00833662	0.00346696	0.00470186
SOD1	protein_coding	6.2316	-0.49984	-0.35579	0.00834937	0.0312401	0.0117131
RALGAPB	protein_coding	6.9175	0.41	0.35115	0.00835648	0.0127652	0.00884115
STK39	protein_coding	4.5542	-0.45506	-0.45159	0.00836232	0.00588988	0.00627037
C4orf46	protein_coding	4.6329	-0.72316	-1.15636	0.00839435	0.00023249	0.00065658
MPDU1	protein_coding	3.9924	-0.51171	-0.38583	0.00839435	0.0248285	0.01111
C1orf112	protein_coding	3.8213	-0.67937	-1.2118	0.00840531	0.00010061	0.000318
TEP1	protein_coding	4.1999	0.50951	0.78833	0.00840671	0.00024167	0.00067656
LDB2	protein_coding	5.2328	-0.50656	0.14762	0.00842689	0.347117	0.00199802
RP11-536O18.2	NA	1.1431	-0.81473	0.22504	0.00843088	0.354963	0.00203663
PSMA2	protein_coding	6.2721	-0.51935	-0.48895	0.00843088	0.00774088	0.00718203
NUDT8	protein_coding	0.7048	-1.17182	-0.25019	0.00843088	0.479031	0.0106824
ZBTB7B	protein_coding	1.5695	0.91083	0.6533	0.00843088	0.0334318	0.0120618
PGK1	protein_coding	7.7716	-0.4421	-0.2474	0.00843088	0.0794166	0.0138614
SNRPGP2	processed_pseudogene	2.0474	-0.82363	-1.07568	0.00843628	0.00117232	0.00233072
IDH2	protein_coding	4.7773	-0.62561	-0.44837	0.00843628	0.0309992	0.0118235
ANKRD20A1	protein_coding	0.893	0.93138	0.42485	0.00843628	0.163466	0.013877
SERBP1P5	processed_pseudogene	5.1306	-0.58163	-0.73662	0.00845796	0.00122181	0.00240196
UQCR10	protein_coding	4.7379	-0.50306	-0.32256	0.00850431	0.0494838	0.0131831
NDUFAF4	protein_coding	3.9028	-0.54444	-0.76828	0.0085059	0.00061021	0.00143003
CRY2	protein_coding	2.3728	0.69357	0.48781	0.00855626	0.0362545	0.0124189
NPM1P24	processed_pseudogene	5.4577	-0.53091	-0.83914	0.00856309	0.00023681	0.00066891
FAM149B1	protein_coding	4.4105	-0.48345	-0.29808	0.0085713	0.0575565	0.0136335
MTHFD1P1	processed_pseudogene	1.8764	-0.61197	-1.0603	0.00858685	0.00015337	0.00046135
SNRPEP2	processed_pseudogene	1.9324	-0.70013	-0.72807	0.00858685	0.00491715	0.00580807
FBXO22	protein_coding	5.1464	0.46934	0.41488	0.00858685	0.0114825	0.00863554
KCTD12	protein_coding	8.225	0.61028	0.59191	0.00862054	0.00654039	0.00677292
MT-CO2	protein_coding	11.6344	-0.42803	-0.25936	0.00862054	0.0605082	0.0137926
LINC00475	lincRNA	-0.4765	2.10323	2.33018	0.00866064	0.00280741	0.00421221
CEP97	protein_coding	4.9858	-0.49565	-0.65013	0.00874156	0.00102507	0.00211704
INADL	protein_coding	3.0578	0.58895	0.5513	0.00876365	0.00864132	0.00771818
COL5A1	protein_coding	6.2912	-0.47411	0.48967	0.00877209	0.00440606	8.34e-05
CSE1L	protein_coding	8.0863	-0.48965	-0.98089	0.00877209	2.85e-05	0.0001003
TOPBP1	protein_coding	6.2955	-0.45051	-0.90716	0.00877209	2.91e-05	0.00010158
MLXIP	protein_coding	5.8398	0.43131	0.55691	0.00877209	0.00104382	0.00215647
PSMA3	protein_coding	7.1832	-0.51312	-0.5029	0.00877209	0.00630612	0.00671349
CA8	protein_coding	1.0595	-0.82845	-1.08956	0.00882546	0.0014057	0.00270167
VPS39	protein_coding	6.0628	0.39477	0.41871	0.00882546	0.00394982	0.005216
HSPD1P6	transcribed_processed_pseudogene	1.4036	-0.77046	-0.82562	0.00882546	0.00447744	0.0056043
SFMBT1	protein_coding	2.4488	-0.74579	-0.69222	0.00882546	0.0093028	0.00804369
CCDC23	protein_coding	1.9613	-0.73996	-0.39814	0.00882546	0.0917349	0.0146457
STARD4	protein_coding	6.5969	-0.42406	-0.22848	0.00882603	0.0927879	0.0146967
PALLD	protein_coding	5.9587	0.42078	0.4701	0.00883901	0.00285922	0.00429025
GRIPAP1	protein_coding	3.8413	0.58926	0.61337	0.00885334	0.00462778	0.00572912
SEH1L	protein_coding	5.5227	-0.54551	-0.60768	0.00889762	0.00306245	0.00448304
CEP104	protein_coding	5.216	0.42481	0.33167	0.00889762	0.0223321	0.0112704
UFC1	protein_coding	5.4316	-0.50348	-0.34536	0.00889762	0.038744	0.0130882
TRIB2	protein_coding	2.9719	-0.55395	-0.01271	0.00895733	0.949679	0.00688802
RP11-397O4.1	lincRNA	-0.0622	1.27253	0.74407	0.00895733	0.0804766	0.0147673
RCN1P2	processed_pseudogene	5.383	0.4059	0.20132	0.00895733	0.123362	0.0150124
CTA-29F11.1	antisense	1.8311	-0.95011	-0.53306	0.00896427	0.0799642	0.0147871
ABHD10	protein_coding	5.277	-0.53969	-0.65029	0.00909089	0.00187804	0.00331613
HNRNPKP4	processed_pseudogene	5.9134	-0.43182	-0.43619	0.00909089	0.00555358	0.00639459
ARAP1	protein_coding	2.5713	0.6839	0.56834	0.00909089	0.0174656	0.0105553
TIMM8BP2	processed_pseudogene	0.9495	-0.88908	-0.70686	0.00909089	0.0216481	0.0112899
SLIT3	protein_coding	-0.6255	-1.02852	-0.10932	0.00912844	0.743797	0.00893218
KIAA0754	NA	5.8486	-0.47303	0.07077	0.00912905	0.652396	0.00388389
AK5	protein_coding	2.9139	-0.64568	-0.93294	0.0091507	0.00059071	0.00141489
RP4-775C13.1	processed_pseudogene	4.894	-0.42093	-0.68601	0.00920103	0.00020961	0.0006114
RNF7	protein_coding	5.3351	-0.45808	-0.10425	0.00920645	0.480826	0.0116547
NUP188	protein_coding	6.3	-0.38543	-0.48146	0.00921095	0.00140392	0.00272637
CKS2	protein_coding	5.3666	-0.83053	-1.36669	0.00925082	0.00020904	0.00060738
MAP3K12	protein_coding	3.5284	0.60321	0.59482	0.00925235	0.00675868	0.007106
HMGB3P6	processed_pseudogene	1.0259	-0.92688	-1.07955	0.00929525	0.00293425	0.00445096
DYNC2H1	protein_coding	3.4138	0.57828	-0.1414	0.00934916	0.468753	0.00287484
SGOL1	protein_coding	3.9379	-0.70897	-1.68547	0.00935962	1.22e-05	4.11e-05
ROBO3	protein_coding	2.5918	0.66471	0.78671	0.00937497	0.00213641	0.00365744
ITGB8	protein_coding	3.7047	0.55482	0.59903	0.00937497	0.00391003	0.00534909
EEF1E1	protein_coding	3.3016	-0.56042	-0.5994	0.00937497	0.00434459	0.00565549
BANF1	protein_coding	5.0928	-0.43049	-0.51281	0.00938385	0.00212567	0.00364897
RGCC	protein_coding	3.224	-0.69776	0.11155	0.00938385	0.623159	0.0038322
TRMT1	protein_coding	3.1818	0.61726	0.4492	0.00938385	0.0333059	0.0131589
ABCD1	protein_coding	1.0982	0.84032	1.0147	0.00941097	0.00181684	0.00329455
RTTN	protein_coding	4.7586	-0.49618	-1.1714	0.00941327	1.07e-05	3.68e-05
SYNCRIP	protein_coding	7.302	-0.40232	-0.58595	0.00946474	0.00047205	0.00118247
C11orf82	NA	3.5502	-0.63581	-1.51162	0.00949113	1.25e-05	4.23e-05
ZNF630	protein_coding	0.5083	1.13454	0.63156	0.00949113	0.0965522	0.0157954
FBRS	protein_coding	3.6546	0.57168	0.65379	0.0095061	0.00272173	0.00430092
SSH3	protein_coding	1.2599	0.8165	0.84451	0.0095061	0.00520772	0.00634427
2017-09-11	protein_coding	8.2469	-0.39633	-0.12324	0.00952158	0.330927	0.013877
RP11-359M6.1	lincRNA	1.5198	0.94289	1.20596	0.00954181	0.00121738	0.00249112
MTMR3	protein_coding	4.6754	0.43441	0.35129	0.00959801	0.0201904	0.0114868
PARP10	protein_coding	0.0712	1.19748	0.87204	0.0096542	0.0353274	0.0136862
LIN9	protein_coding	2.8656	-0.65856	-1.26343	0.00966327	7.47e-05	0.00023953
KCNMB2	protein_coding	-0.5492	1.51965	1.4603	0.00966327	0.00840157	0.0080868
SRC	protein_coding	4.2813	0.48369	0.34749	0.00966327	0.0351631	0.0136862
TUBB4B	protein_coding	6.9541	-0.73927	-0.95652	0.00973459	0.00116549	0.00242147
WDR4	protein_coding	2.5512	-0.60844	-0.63905	0.00982463	0.00515293	0.00639459
TYSND1	protein_coding	2.3227	0.66396	0.42667	0.00982818	0.0573029	0.0153746
ABCG1	protein_coding	2.4587	0.65738	0.91112	0.00982973	0.00070319	0.00166109
NCOR2	protein_coding	6.16	0.60274	0.56745	0.00982973	0.00886144	0.00836239
ALG8	protein_coding	5.086	-0.44415	-0.36948	0.00986041	0.0176803	0.011176
RP11-184M15.1	lincRNA	1.325	-0.89442	-0.63754	0.00986041	0.0346401	0.0138294
MT-TY	Mt_tRNA	0.1837	-1.02524	-0.43925	0.00991527	0.172166	0.0162566
PDHB	protein_coding	6.3434	-0.41803	-0.44335	0.00993217	0.00448778	0.00593341
MRPS6	protein_coding	3.9927	-0.49406	-0.49136	0.00994749	0.00699854	0.00748736
RP11-312J18.5	processed_pseudogene	5.367	-0.4634	-0.51172	0.00995967	0.0036311	0.00523921
MAP3K10	protein_coding	-0.0909	1.26984	1.56303	0.0099642	0.00163362	0.00313764
FAF1	protein_coding	4.7584	-0.45543	-0.6621	0.00996774	0.00057726	0.0014137
PDIA4	protein_coding	7.1465	-0.44715	-0.11342	0.00997808	0.435334	0.0132424
ITGB1BP1	protein_coding	5.1106	-0.4947	-0.24947	0.009997	0.121114	0.0166813
HSD3BP5	transcribed_unprocessed_pseudogene	0.089	1.07958	0.77445	0.0100026	0.0387789	0.014406
ABCA12	protein_coding	-0.5812	1.35466	0.05289	0.010037	0.920684	0.00798315
GSG2	protein_coding	2.4749	-0.67478	-1.59082	0.0100501	1.67e-05	5.8e-05
SIN3B	protein_coding	4.3528	0.48269	0.56554	0.0100501	0.0024538	0.00411549
ACAT1	protein_coding	5.5132	-0.53588	-0.46798	0.0100501	0.0139799	0.0103241
ITGB1P1	processed_pseudogene	7.349	-0.38038	-0.13004	0.0100535	0.289425	0.0153014
FDPSP5	processed_pseudogene	2.0265	-0.92184	-0.3526	0.0100535	0.226945	0.0160327
PFKFB2	protein_coding	2.0499	0.67818	0.57152	0.0100856	0.0177769	0.0113405
CHAF1A	protein_coding	3.6429	-0.66876	-1.27063	0.0101519	8.52e-05	0.00027384
NOP58	protein_coding	6.1696	-0.46788	-0.96519	0.0101548	2.98e-05	0.00010351
DIS3L	protein_coding	4.5669	-0.43001	-0.74131	0.0101659	0.00015681	0.00047703
FAM160B2	protein_coding	2.606	0.77409	0.82821	0.0101659	0.00449447	0.0060005
AC007362.1	NA	6.2009	0.50532	1.00087	0.0101674	3.74e-05	0.00013052
UBE2V2	protein_coding	4.6112	-0.46939	-0.68101	0.0101741	0.00060587	0.00148473
PCNA	protein_coding	5.6359	-0.50743	-1.04602	0.0101816	3.27e-05	0.00011291
SCLT1	protein_coding	4.6239	-0.52431	-0.93076	0.0102583	0.00012881	0.00040097
FARSB	protein_coding	5.7985	-0.42302	-0.70761	0.0103021	0.00019038	0.00056372
RP11-93I21.3	lincRNA	0.409	1.05813	1.60217	0.0103021	0.00035811	0.00097715
HNRNPA3P6	processed_pseudogene	5.1577	-0.50434	-0.51443	0.0103021	0.00612039	0.00714677
ZFP41	protein_coding	1.7885	0.73026	0.6574	0.0103021	0.0127671	0.0101224
PLCD3	protein_coding	2.4128	0.67233	0.58711	0.0103021	0.0149483	0.0108484
TLDC1	protein_coding	4.6151	0.511	0.41707	0.0103021	0.0205291	0.0121626
AP001053.11	NA	0.3019	1.1131	1.16943	0.0103041	0.00515293	0.00657596
ARL1	protein_coding	5.8791	-0.41921	-0.15979	0.0103041	0.239089	0.016324
METTL7A	protein_coding	1.8392	-0.76524	-0.7906	0.0103088	0.00630098	0.00723757
GLRX5	protein_coding	4.7331	-0.61524	-0.39493	0.0103088	0.0554102	0.0160272
MTRNR2L9	processed_pseudogene	2.942	-0.67382	-0.54386	0.0103122	0.0215352	0.0123703
IGKV1OR-2	IG_V_pseudogene	-0.1553	-1.15976	0.13778	0.010349	0.716299	0.00494956
ZFYVE1	protein_coding	3.7156	0.51557	0.71377	0.0103594	0.00077802	0.00183197
MTHFR	protein_coding	2.9141	0.61252	0.7874	0.0103594	0.00133354	0.00273078
MYO1F	protein_coding	-0.9048	1.33007	1.60395	0.0103594	0.00202348	0.00368177
SLC24A1	protein_coding	3.593	0.59916	0.50358	0.0103594	0.0182381	0.0117131
NPAS2	protein_coding	5.4881	0.453	0.602	0.0103707	0.00105347	0.00228651
CCNL2	protein_coding	5.7044	0.44151	0.82727	0.0104255	6.63e-05	0.00021756
FABP5	protein_coding	2.4401	-0.68601	-0.48913	0.0104255	0.0375168	0.0149063
NCAPD2	protein_coding	5.8619	-0.52683	-0.82268	0.0104524	0.00034089	0.00093814
MXI1	protein_coding	2.5771	0.75127	0.84117	0.0104718	0.003465	0.00523264
CHSY3	protein_coding	1.0162	-0.86792	-0.26483	0.0104816	0.34018	0.015381
PRICKLE1	protein_coding	3.9831	-0.48963	-0.19527	0.0104816	0.220046	0.0169246
LINC00263	NA	2.9912	-0.62203	-0.28404	0.0105378	0.161279	0.0175721
AC016734.2	processed_pseudogene	4.0495	-0.49051	-0.5084	0.0105804	0.00593162	0.00714677
PSMD7	protein_coding	6.3188	-0.45257	-0.51323	0.0105851	0.00321219	0.00501336
EXOSC9	protein_coding	4.732	-0.48899	-0.95083	0.0105993	6.44e-05	0.00021138
RHEB	protein_coding	5.505	-0.49118	-0.45253	0.0105993	0.0111273	0.00975112
NOP10	protein_coding	5.8738	-0.53268	-0.34245	0.0105993	0.0561945	0.0164803
GOLGA8A	protein_coding	4.74	0.43455	0.55494	0.0106118	0.00143912	0.00292357
HERC6	protein_coding	2.3107	0.63009	0.21766	0.0106118	0.303909	0.016076
PPATP1	processed_pseudogene	1.1643	-0.79744	-1.05846	0.0106317	0.00151788	0.00305423
C17orf62	protein_coding	3.3817	0.66635	0.6973	0.0106317	0.00544955	0.00688802
TIMM10	protein_coding	3.7209	-0.8027	-0.79874	0.0106317	0.00775486	0.0082344
FBXW4	protein_coding	2.7161	0.60138	0.5757	0.0106317	0.00928926	0.00904686
SLC24A6	NA	3.4831	0.56387	0.45905	0.0106317	0.0219632	0.0128027
TMEM47	protein_coding	5.064	0.47051	0.16396	0.0106317	0.293759	0.0162566
EVC	protein_coding	4.2008	0.51479	0.44563	0.0106403	0.0160142	0.0113733
PDLIM3	protein_coding	3.5604	-0.47239	-0.55796	0.0106747	0.00273625	0.00452791
NSMF	protein_coding	3.1214	0.72994	0.68808	0.0106747	0.0101994	0.0094319
SHFM1	protein_coding	6.4204	-0.6394	-0.37005	0.0107206	0.0820155	0.0176614
CEP164	protein_coding	4.5301	0.54479	0.4178	0.0107233	0.0286377	0.0141185
RP11-597D13.9	antisense	3.1621	0.71153	0.71808	0.0107472	0.00694912	0.00780372
HIVEP2	protein_coding	4.1448	0.46103	0.40974	0.010777	0.0141733	0.0109336
ERLIN1	protein_coding	6.464	-0.42015	-0.6809	0.0108297	0.00025102	0.00072771
PTMA	protein_coding	8.3607	-0.50326	-0.66949	0.0108297	0.00109404	0.00239499
FADS2	protein_coding	6.7747	-0.50921	0.11889	0.0108297	0.482589	0.00349778
ZNF471	protein_coding	1.3684	0.88009	1.03856	0.0108297	0.0025838	0.00441353
AHNAK2	protein_coding	7.7478	0.50202	0.69363	0.0108331	0.00082612	0.00193659
RP11-420A23.1	lincRNA	0.9547	0.96785	1.79886	0.0108609	6.39e-05	0.00020948
MPHOSPH6	protein_coding	5.4573	-0.44391	-0.64205	0.0108609	0.0006484	0.0016045
NIPA2	protein_coding	6.0575	-0.42184	-0.44029	0.0108639	0.0055672	0.00703694
FAM227A	protein_coding	1.0678	1.03816	1.27393	0.0108694	0.00193692	0.00365525
RAD50	protein_coding	5.7939	0.45887	-0.07431	0.0108694	0.642261	0.00465804
MARCKS	protein_coding	7.5527	-0.42769	-0.05786	0.0108694	0.697505	0.0113972
XXyac-YRM2039.2	NA	1.9222	0.73009	0.62132	0.0108694	0.018174	0.0121639
GCC2	protein_coding	5.3933	0.4781	0.03843	0.0108777	0.826809	0.00991867
RP11-792D21.2	NA	1.8405	-0.73879	-0.13509	0.0108777	0.583218	0.0128249
ARVCF	protein_coding	2.6349	0.68256	0.61033	0.010887	0.0140626	0.0109897
GNA14	protein_coding	0.6664	0.86706	0.71764	0.0108892	0.0216078	0.0129949
SMAD7	protein_coding	1.3982	0.78252	0.75622	0.010958	0.00911992	0.0091455
TMC7	protein_coding	2.4851	0.75125	0.95062	0.0109678	0.00158295	0.00318611
PARP3	protein_coding	2.2704	0.65925	0.93872	0.0109703	0.00066998	0.00164438
MTBP	protein_coding	3.3399	-0.55028	-1.21361	0.0110135	2.65e-05	9.26e-05
ARHGAP11B	protein_coding	4.7593	-0.57445	-1.3695	0.0110519	1.33e-05	4.46e-05
FANCD2	protein_coding	4.4352	-0.62515	-1.03392	0.0110519	0.00027021	0.00078152
PCDH10	protein_coding	5.2044	-0.46516	-0.08177	0.0110519	0.605804	0.0127676
MLF1IP	NA	3.2119	-0.65979	-1.81186	0.0110848	5.56e-06	1.83e-05
SEC61B	protein_coding	5.8972	-0.49407	-0.03926	0.0110848	0.825894	0.0101224
SUPT6H	protein_coding	6.612	0.37327	0.26802	0.0110941	0.0375203	0.0157954
POP7	protein_coding	3.2487	-0.73227	-0.80426	0.0111126	0.00462147	0.00642652
ZNF462	protein_coding	5.3777	0.43762	0.60968	0.0111178	0.00081943	0.00193974
SIDT2	protein_coding	3.8635	0.4831	0.70095	0.0111759	0.00061021	0.00153027
GEN1	protein_coding	4.3247	-0.50271	-1.1378	0.011186	2.03e-05	7.19e-05
NUDT21	protein_coding	6.4483	-0.46756	-0.72226	0.0112178	0.00039449	0.00106676
AEN	protein_coding	4.9362	0.57826	0.55192	0.0112178	0.00975704	0.0095575
CETN2	protein_coding	5.6649	-0.45767	-0.04367	0.0112277	0.79048	0.0107445
VWF	protein_coding	9.4314	-0.43786	0.22499	0.0112359	0.121823	0.00116521
FDPS	protein_coding	3.893	-0.61547	-0.02022	0.0112359	0.930472	0.00907334
MZT1	protein_coding	3.7696	-0.66999	-1.08196	0.0113391	0.00034119	0.00095843
SMS	protein_coding	6.0766	-0.47286	-0.50848	0.0113391	0.00488858	0.00672831
PML	protein_coding	5.0007	0.45378	0.54122	0.0113566	0.00252554	0.00442831
GCH1	protein_coding	2.2584	-0.70103	-0.36458	0.0113566	0.118123	0.0189906
ANKRD20A4	protein_coding	1.4284	0.85917	0.48919	0.011464	0.0998874	0.0189761
RPS6KL1	protein_coding	2.1982	0.62181	0.58522	0.0114678	0.0111576	0.0102448
NIP7	protein_coding	5.3845	-0.42847	-0.62183	0.0114801	0.00068267	0.00168741
MYO1B	protein_coding	6.5663	-0.41944	-0.18409	0.0114827	0.185821	0.0189438
NSUN5	protein_coding	2.0049	0.62381	0.23723	0.0115109	0.264931	0.0181947
TIMM21	protein_coding	4.9562	-0.53951	-0.79734	0.0115298	0.00062548	0.00157315
NUP155	protein_coding	6.2264	-0.45857	-0.7265	0.0115499	0.00034089	0.00095843
CTC-241N9.1	lincRNA	-0.9124	1.48454	1.87601	0.0115499	0.00163229	0.00330621
RDH11	protein_coding	5.5768	-0.40966	-0.31046	0.0115499	0.0311233	0.0153902
ASB9	protein_coding	1.7384	-0.76738	-0.36531	0.0115499	0.150997	0.0192624
ZKSCAN7	protein_coding	0.3661	1.19497	0.7891	0.0115897	0.0609584	0.018204
FCHSD1	protein_coding	2.0678	0.65608	0.93102	0.0116332	0.00074916	0.00182218
MEN1	protein_coding	3.9527	0.47857	0.22814	0.011699	0.160636	0.0194527
EFNB2	protein_coding	4.4177	-0.64475	-0.21261	0.0117259	0.318189	0.0178014
POLA2	protein_coding	4.1591	-0.54544	-1.04225	0.0117265	9.25e-05	0.00029788
APOO	protein_coding	2.9905	-0.53601	-0.50122	0.0117335	0.0117947	0.0106882
MRP63	NA	4.0685	-0.46885	-0.42241	0.0117497	0.0142826	0.0115749
FLCN	protein_coding	3.8279	0.49393	0.39814	0.0117519	0.0248772	0.0144881
LRRC2	protein_coding	0.0006	1.00788	0.80523	0.0117837	0.0271124	0.0149647
DMTN	protein_coding	2.59	0.62307	0.91266	0.0117927	0.00060137	0.00152621
DAK	NA	1.4534	0.74296	0.81078	0.0117927	0.00476735	0.00674693
TPI1P1	processed_pseudogene	5.2812	-0.508	-0.51335	0.0117994	0.0074969	0.00858225
ABCB1	protein_coding	2.1255	-0.81842	-0.41966	0.0118152	0.121436	0.0197373
ANXA5	protein_coding	9.0026	-0.36809	-0.34401	0.011819	0.0111388	0.0104575
MAMDC2	protein_coding	0.8011	1.03065	1.45494	0.0118202	0.00076161	0.00185185
OAS2	protein_coding	1.4505	0.86857	0.85745	0.0118202	0.00886144	0.00939204
BX842568.2	processed_pseudogene	1.4693	-0.73711	-0.72204	0.0118202	0.0096301	0.00979574
SERPINE2	protein_coding	3.26	0.70811	0.51066	0.0118202	0.0411047	0.0170475
MAP3K5	protein_coding	2.9458	-0.54804	-0.62657	0.0118402	0.00385354	0.00593341
KIAA1024	protein_coding	1.9186	-0.67605	0.24217	0.0118522	0.26423	0.00226775
ZNF444	protein_coding	2.5024	0.63462	0.75033	0.0118522	0.00287002	0.00491594
NDUFS5	protein_coding	5.8102	-0.65438	-0.1929	0.0118661	0.37715	0.0172856
HMGN5	protein_coding	1.4998	-0.78838	-0.94257	0.0118745	0.00333313	0.0054082
CORO1C	protein_coding	7.5017	-0.37053	-0.35046	0.0118745	0.0105594	0.0102338
RP3-388N13.2	NA	1.2779	-0.8602	-0.17015	0.0118745	0.552131	0.0146861
KIF18B	protein_coding	4.1851	-0.68717	-1.51363	0.0119013	3.24e-05	0.0001107
ANXA2P3	processed_pseudogene	2.9174	-0.64352	-0.42593	0.0119013	0.0548105	0.018303
ZNF33B	protein_coding	3.5962	0.5873	0.39415	0.0119626	0.0554102	0.0184233
TMA7	protein_coding	3.858	-0.72358	-0.33409	0.0119626	0.1663	0.0200013
ZNF419	protein_coding	2.3696	0.62249	0.54772	0.0119872	0.0167011	0.0126053
PSMD10	protein_coding	5.9771	-0.44785	-0.36423	0.0120263	0.0232678	0.014442
KCTD16	protein_coding	-0.4088	1.10874	0.8528	0.0120263	0.0336526	0.0163384
CDC42	protein_coding	6.4062	-0.37634	-0.24712	0.0120263	0.0566652	0.0185857
DCXR	protein_coding	3.6673	-0.58852	-0.51884	0.0120394	0.0162802	0.0125105
FGF5	protein_coding	1.1218	-0.91502	-0.92276	0.0120616	0.0072728	0.00856377
ZNF514	protein_coding	3.3961	0.51729	0.51754	0.0120616	0.00826737	0.00918972
HSBP1	protein_coding	5.7948	-0.46858	-0.31152	0.0120616	0.0545536	0.0185247
SCDP1	processed_pseudogene	3.1037	-0.62407	-0.34951	0.0120616	0.0980543	0.0200203
CCDC84	protein_coding	4.2651	0.45866	0.73931	0.0120839	0.00030083	0.00087341
POP1	protein_coding	4.4057	-0.48013	-0.52386	0.0120839	0.00507945	0.00707623
URB1	protein_coding	5.4702	0.39045	0.16283	0.0120839	0.21675	0.01977
FRY	protein_coding	4.9178	-0.51093	-0.32694	0.0120978	0.0633393	0.0190159
AC005550.3	antisense	0.5631	-1.09639	-1.35213	0.0121315	0.0027692	0.0048612
IL3RA	protein_coding	1.2627	-0.83708	0.32292	0.0121446	0.224693	0.0020428
PSMA2P3	processed_pseudogene	2.045	-0.65957	-0.62183	0.0121912	0.0120719	0.0110942
PAPLN	protein_coding	1.8102	0.66773	0.90479	0.0122036	0.00113989	0.00255469
ANKRD42	protein_coding	2.9809	0.61863	0.59757	0.0122036	0.0103027	0.0103017
CEP112	protein_coding	4.6582	-0.45615	-0.4249	0.0122036	0.012371	0.0112135
METTL22	protein_coding	3.0027	0.50145	0.29567	0.0122036	0.0897801	0.020141
RP11-169K16.7	NA	4.346	-0.59595	-0.25842	0.0122178	0.195292	0.0203121
HADH	protein_coding	4.0355	-0.52415	-0.64553	0.0122204	0.00245573	0.0044834
CUL9	protein_coding	3.6019	0.65773	0.70718	0.0122288	0.00544866	0.00736006
CHCHD1	protein_coding	3.4335	-0.63033	-0.49729	0.0122288	0.0279624	0.0157085
HMGN3P1	processed_pseudogene	0.4837	-0.83545	-0.65484	0.0122288	0.0288568	0.0158639
ATP5LP2	processed_pseudogene	2.066	-0.71814	-0.29286	0.0122288	0.220286	0.0200382
UQCRH	protein_coding	5.8868	-0.54768	-0.25172	0.0122288	0.17192	0.020544
OIP5	protein_coding	0.4997	-0.8594	-1.55879	0.0123188	0.00022157	0.00066608
RP11-309L24.6	unprocessed_pseudogene	3.8211	0.60528	0.52801	0.0123188	0.0178824	0.0132596
YBX1P2	processed_pseudogene	5.8264	-0.50933	-0.35457	0.0123188	0.0463926	0.0182553
EMP2	protein_coding	3.4205	-0.59529	-0.98811	0.0123573	0.00031767	0.00091553
AC012613.2	antisense	1.7168	0.68118	0.32741	0.0124432	0.167263	0.0208804
ATG2A	protein_coding	2.4041	0.62327	0.44475	0.0124479	0.0453342	0.0182839
CENPJ	protein_coding	5.1303	-0.49247	-1.18674	0.0124996	1.35e-05	4.46e-05
UBE2C	protein_coding	4.5678	-0.53367	-1.18551	0.0125057	2.84e-05	9.94e-05
FGF14	protein_coding	1.7158	-0.8611	-0.54787	0.0125121	0.0656962	0.0197407
STK32C	protein_coding	1.3002	-0.8054	-0.10698	0.0125969	0.703135	0.0134552
CHD1L	protein_coding	5.1543	-0.41118	-0.41517	0.0125972	0.00811843	0.00930595
ACSL4	protein_coding	6.9914	-0.39816	-0.41149	0.0126065	0.00684652	0.00850157
NUDCD1	protein_coding	5.1104	-0.47376	-0.62822	0.0126072	0.00148623	0.00319509
DDIT4	protein_coding	0.3181	0.95468	0.48309	0.0126072	0.151497	0.0211499
PXN	protein_coding	6.4792	0.40371	0.45155	0.0126188	0.00425199	0.00649555
TRA2B	protein_coding	6.9342	-0.38584	-0.4523	0.0127229	0.00321642	0.00543352
CYTL1	protein_coding	3.5675	0.65714	1.91	0.0127309	1.83e-06	5.22e-06
NRG4	protein_coding	1.7648	0.79182	0.78041	0.0127309	0.00960889	0.0102269
GRAMD4	protein_coding	1.0763	0.78553	1.07956	0.01274	0.00107785	0.0024745
SUB1	protein_coding	5.5336	-0.42294	-0.3949	0.01274	0.0125466	0.0115749
ATP1B3	protein_coding	7.2087	-0.47974	-0.14126	0.01274	0.385481	0.0185529
ZFP3	protein_coding	2.0081	0.6883	0.45902	0.01274	0.0600142	0.0197407
RANP6	processed_pseudogene	-0.303	-1.01848	-0.85598	0.0127408	0.0214815	0.0146246
ICAM1	protein_coding	1.6981	0.91019	1.18948	0.0127444	0.00151866	0.00325396
MAPRE3	protein_coding	0.1255	0.97905	1.14395	0.0127444	0.00334207	0.00559787
FANCA	protein_coding	3.5385	-0.63199	-1.15803	0.0128092	0.0001616	0.00050238
GTF2A2	protein_coding	5.2954	-0.49523	-0.55155	0.0128092	0.00466226	0.00693903
C19orf54	protein_coding	2.344	0.66232	0.10339	0.0128092	0.674677	0.0142193
PPP1R3F	protein_coding	0.3583	1.04292	0.93954	0.0128185	0.0160611	0.0130134
TMEM200A	protein_coding	4.2497	0.57457	0.52569	0.0128395	0.0143307	0.0123343
RNF213	protein_coding	7.5832	0.39807	0.42291	0.0128421	0.00592133	0.00789626
SEZ6L2	protein_coding	-0.1284	1.0174	1.71128	0.0128458	0.00019139	0.00058224
RP11-343N15.1	NA	1.3682	0.75599	0.83269	0.0128458	0.00500587	0.00720553
RP11-379H18.1	antisense	2.9454	0.57363	0.37316	0.0128597	0.0656347	0.0203206
MCMBP	protein_coding	5.6878	-0.44242	-0.57072	0.0128717	0.00181382	0.00371336
BCORL1	protein_coding	3.4196	0.51558	0.63881	0.0128717	0.00235795	0.00441963
HNRNPC	protein_coding	8.3449	-0.4603	-0.42163	0.0128717	0.0136755	0.0121404
MTCH2	protein_coding	6.122	-0.44495	-0.35455	0.0128717	0.0271385	0.0161715
CTD-2653D5.1	antisense	-0.2956	1.1869	0.88729	0.0128775	0.0394097	0.01821
AC018720.10	NA	1.7151	0.76153	0.97198	0.0128915	0.00187794	0.00380056
PDZD11	protein_coding	5.0474	-0.43024	-0.22773	0.0128958	0.122189	0.0216657
KIF22	protein_coding	4.2211	-0.72203	-1.50136	0.0129161	6.29e-05	0.00020513
FNDC9	protein_coding	-0.6743	1.83547	1.75439	0.0129512	0.0118789	0.0114265
CLCN7	protein_coding	1.5717	0.85753	0.6502	0.0129512	0.0365563	0.0179633
ATP5C1P1	processed_pseudogene	1.2604	-0.77311	-0.39344	0.0129917	0.133043	0.0218436
DUSP8	protein_coding	0.5073	0.97239	0.93783	0.0129931	0.0112345	0.0111907
HSPA8P8	processed_pseudogene	3.2737	-0.53636	-1.00449	0.0130225	0.00013349	0.00042513
ZNF862	protein_coding	2.2143	0.70605	1.10608	0.0130225	0.00040698	0.00113047
MBD5	protein_coding	4.6347	0.49365	0.72577	0.0130225	0.00068737	0.00175627
HNRNPKP2	processed_pseudogene	3.961	-0.45762	-0.4979	0.0130225	0.00571715	0.00780475
GPR180	protein_coding	4.7584	-0.48709	-0.41291	0.0130225	0.021193	0.0148739
RP11-545E17.3	antisense	-0.0174	-0.99909	-0.3172	0.0130225	0.337196	0.0198237
SIK1	protein_coding	2.4432	0.63551	0.43539	0.0130225	0.0552548	0.0199313
EXO1	protein_coding	4.0646	-0.75008	-1.85623	0.0130726	1.6e-05	5.51e-05
CCDC59	protein_coding	5.1868	-0.47019	-0.73577	0.0130848	0.00049275	0.00132025
SRSF10	protein_coding	5.8856	-0.392	-0.58956	0.0130848	0.00062206	0.00161434
LURAP1L	protein_coding	-0.25	1.19873	0.21912	0.0130848	0.628564	0.015381
NF1	protein_coding	6.8168	0.40125	0.4237	0.013137	0.00634853	0.00835463
NEK2	protein_coding	4.2907	-0.81771	-1.6431	0.013182	8.48e-05	0.00027413
TOE1	protein_coding	2.6174	-0.54776	-0.74481	0.013182	0.00147616	0.00323074
GPR137C	protein_coding	-0.1824	-1.10868	-1.09124	0.0131921	0.0105051	0.0109336
TNFRSF1A	protein_coding	5.6484	0.41565	0.25142	0.0131921	0.0826023	0.0215031
DNAJC19P9	processed_pseudogene	4.8719	-0.56338	-0.62085	0.0131978	0.00524772	0.00752888
NPL	protein_coding	-0.0273	1.12	0.839	0.0131978	0.0395149	0.018606
NGRN	protein_coding	2.6082	-0.58328	-0.32464	0.0131978	0.106753	0.0220282
PTMS	protein_coding	5.7868	-0.63107	-0.27197	0.0132191	0.205169	0.021956
RP5-857K21.11	unprocessed_pseudogene	6.7942	-0.63553	-0.4069	0.0132821	0.0667601	0.0210629
YES1	protein_coding	7.5143	-0.47562	-0.61557	0.0133156	0.00176737	0.00369101
FBXW7	protein_coding	4.6818	0.4333	0.2611	0.0133156	0.0865364	0.0218023
RP11-321E8.1	NA	4.0333	-0.47976	-0.36286	0.0133685	0.0359951	0.018303
RALGDS	protein_coding	2.9241	0.59588	0.69469	0.0133792	0.00366838	0.0060585
FAM167A	protein_coding	-0.0977	1.12403	0.22403	0.0133808	0.600346	0.0162248
TUBGCP3	protein_coding	4.6496	-0.43396	-0.64224	0.0133895	0.00077712	0.00195634
DCTPP1	protein_coding	4.2055	-0.54636	-0.64982	0.0133895	0.003465	0.00587044
RP11-17G12.2	antisense	-0.6316	1.26605	1.6766	0.0134021	0.00144024	0.00318611
IPO9	protein_coding	7.0731	-0.35064	-0.33287	0.0134021	0.0118496	0.0116797
SCAMP5	protein_coding	1.0567	0.81613	1.13452	0.0134117	0.00106724	0.00248999
ANK3	protein_coding	3.84	-0.44639	-0.62781	0.0134117	0.00115608	0.00266489
KCNJ2	protein_coding	3.9987	0.52465	0.69368	0.0134117	0.00155729	0.00337083
ALK	protein_coding	0.5143	0.98686	1.01667	0.0134117	0.00801248	0.00962939
PGPEP1	protein_coding	2.8016	0.64384	1.05666	0.0134405	0.00029852	0.00087869
GPRC5B	protein_coding	2.1942	-0.73497	-0.12411	0.013459	0.630957	0.0159169
TBC1D1	protein_coding	6.4465	-0.40907	-0.19406	0.0135341	0.167564	0.0228413
HERC5	protein_coding	-0.3723	1.24734	-0.22777	0.0135718	0.644212	0.0060005
SSR1	protein_coding	7.8388	-0.40712	-0.37838	0.0136167	0.0134416	0.0125105
CRIPAK	protein_coding	2.9856	0.64001	0.83133	0.0136548	0.00180167	0.00377681
GS1-124K5.11	lincRNA	2.3289	0.64707	0.84914	0.0136628	0.00166404	0.00357591
ING2	protein_coding	1.6627	-0.63737	-0.88401	0.0136651	0.0015026	0.00330621
MOB3A	protein_coding	5.1772	0.45525	0.44169	0.0136695	0.0110402	0.0114057
PREX2	protein_coding	7.0766	-0.39497	-0.25611	0.0136807	0.0651036	0.0214403
SPDYE1	protein_coding	1.8748	0.72968	0.80775	0.0136838	0.00519877	0.0075904
IL18BP	protein_coding	3.6106	0.50461	0.64174	0.0136901	0.0021284	0.00421221
CEP78	protein_coding	5.2173	-0.51418	-0.96305	0.0137202	0.00012851	0.00040562
HLA-DPB1	protein_coding	1.5463	-0.7285	-1.20106	0.0137202	0.00048845	0.00132218
ARHGEF10	protein_coding	6.7676	-0.36861	-0.13418	0.0137202	0.288611	0.0217481
GABRE	protein_coding	3.4441	0.53462	1.0274	0.0138165	8.11e-05	0.00026402
LCAT	protein_coding	1.8258	0.75921	1.04891	0.0138309	0.00115783	0.00269782
AVIL	protein_coding	1.1505	0.76071	0.51983	0.0138309	0.0596065	0.0212912
NCR3LG1	protein_coding	5.2102	-0.46697	-0.37026	0.0138576	0.0300936	0.0178211
MYL6	protein_coding	9.6963	-0.68193	-0.12469	0.0138606	0.608451	0.0168105
PRDX4	protein_coding	5.9367	-0.38407	-0.24133	0.0138798	0.0740098	0.022177
USP19	protein_coding	3.053	0.54489	0.13308	0.0139053	0.498755	0.0186266
SNRPE	protein_coding	4.2167	-0.58272	-0.61888	0.0139105	0.00703205	0.0091455
CBX2	protein_coding	2.5592	-0.62343	-0.57593	0.013922	0.0151721	0.0134742
LHX4	protein_coding	3.5673	0.49733	0.38315	0.0139226	0.0356329	0.0188261
NR2F1	protein_coding	2.7915	-0.65043	-0.33645	0.0139445	0.134437	0.0235887
PHLDA2	protein_coding	2.7955	-0.56727	-0.19767	0.0139492	0.308971	0.0218104
RP13-93L13.2	processed_pseudogene	0.7302	-0.71845	-0.67553	0.0139586	0.0145595	0.0132215
USP48	protein_coding	7.3982	-0.35632	-0.29259	0.0139586	0.0252972	0.0168406
B4GALT6	protein_coding	4.0648	-0.46541	-0.23318	0.0140061	0.148733	0.023713
ACO1	protein_coding	6.6071	-0.35607	-0.30077	0.0140159	0.0223286	0.0160663
SPDL1	protein_coding	6.6094	-0.55966	-1.16612	0.0140416	4.89e-05	0.00016407
ZNF623	protein_coding	4.3703	0.42675	0.54048	0.0140806	0.00228351	0.00446854
FGD5-AS1	antisense	5.815	-0.54355	-0.25135	0.0140806	0.180451	0.0237192
CRELD2	protein_coding	3.78	-0.54639	0.05947	0.0141291	0.767385	0.00757406
CFB	protein_coding	0.2803	0.96806	0.93953	0.0141291	0.01216	0.0121996
PTRHD1	protein_coding	2.9467	-0.66865	-0.33219	0.0141409	0.151331	0.0238887
BORA	protein_coding	3.0165	-0.54819	-1.10583	0.0141711	8.76e-05	0.00028465
RP11-512F24.1	processed_pseudogene	2.9102	-0.58076	-0.63983	0.0141711	0.00596698	0.00837812
HHIPL1	protein_coding	0.0123	1.16247	1.23315	0.0141711	0.00704473	0.00921655
TMSB4X	protein_coding	8.3947	-0.57684	-0.07213	0.0141711	0.735514	0.015117
ZNF211	protein_coding	2.094	0.62386	0.90153	0.0142471	0.00088649	0.00219151
SLIRP	protein_coding	3.7981	-0.51011	-0.40384	0.0142471	0.0315753	0.0184771
FTH1P11	processed_pseudogene	3.2057	0.78374	0.80856	0.0142481	0.00831125	0.0101267
ATP5EP2	protein_coding	4.0299	-0.53558	-0.14539	0.0142927	0.43501	0.0203337
C9orf72	protein_coding	3.6172	0.49957	-0.30368	0.0143042	0.096658	0.0012374
RP11-111M22.3	lincRNA	0.8404	-0.83555	-0.40567	0.0143042	0.158298	0.0241798
SNCAIP	protein_coding	2.5811	-0.74728	-0.09731	0.0143457	0.718387	0.0155805
SPDYE2	protein_coding	2.2412	0.64212	0.97844	0.0144178	0.00058905	0.00155997
GOLM1	protein_coding	7.9399	-0.40162	-0.32096	0.0144294	0.0293503	0.018204
AC104297.1	processed_pseudogene	1.7795	-0.70777	-0.4912	0.014509	0.0540131	0.0216486
ATP5G1P5	processed_pseudogene	-0.0839	-1.00927	-0.67035	0.0145145	0.0623469	0.0223798
C1QBP	protein_coding	5.8307	-0.435	-0.39352	0.0145495	0.0167187	0.0145124
RP11-61N20.3	processed_pseudogene	0.6163	-0.80206	-0.61896	0.0145822	0.0357708	0.0194729
TOX	protein_coding	4.4701	-0.41777	-0.71943	0.0146022	0.0002856	0.00085018
MN1	protein_coding	0.7851	0.87066	1.19342	0.0146113	0.00129681	0.00298449
PSRC1	protein_coding	1.9327	-1.22779	-1.70513	0.0146113	0.001889	0.0039762
PDCD5	protein_coding	4.545	-0.4704	-0.41793	0.0146113	0.0188852	0.015381
ZNF438	protein_coding	4.7224	-0.42988	-0.3299	0.0146113	0.0362701	0.0196032
LINC00657	lincRNA	7.4006	0.40368	0.40659	0.0146154	0.00928926	0.0109336
WEE1	protein_coding	4.9858	-0.40938	-0.61251	0.0146324	0.00079953	0.00203663
FOCAD	protein_coding	5.8918	-0.39978	-0.00912	0.0146324	0.95414	0.0118338
RHBDD3	protein_coding	1.3444	0.80298	0.29786	0.0146327	0.305232	0.0230406
CLIP4	protein_coding	5.3035	0.44493	0.36495	0.0146611	0.0274484	0.0180308
ZNF629	protein_coding	2.452	0.61149	0.61716	0.0146836	0.00980278	0.0112378
PRKAR2A	protein_coding	5.8672	-0.37147	-0.21497	0.0147291	0.100848	0.0243727
FAM95B1	processed_transcript	0.1594	1.03177	0.85606	0.0147463	0.0279608	0.0181947
CMSS1	protein_coding	4.6108	-0.47506	-0.84567	0.0147828	0.00022874	0.00069018
MRPL13	protein_coding	5.4597	-0.39797	-0.57929	0.0147828	0.00096877	0.0023642
PPP1R16B	protein_coding	3.761	-0.49242	0.14421	0.0147828	0.39617	0.00411779
NBR1	protein_coding	6.8535	0.38794	0.23094	0.0147828	0.0926015	0.0242446
MAPK9	protein_coding	5.5127	-0.37876	-0.14571	0.0148808	0.269119	0.0239625
ZFPM1	protein_coding	-0.6622	1.10711	1.18433	0.0148977	0.00713821	0.00951873
AC159540.1	lincRNA	2.6712	-0.59435	0.36444	0.0149194	0.0756943	0.00107569
SERINC2	protein_coding	3.3271	0.60781	0.73349	0.0149194	0.00334207	0.00596219
TDPX2	NA	3.3624	-0.59161	-0.40851	0.0149194	0.0563088	0.022431
CCT6A	protein_coding	8.2563	-0.41076	-0.5458	0.0149934	0.00171342	0.00374579
DNPH1	protein_coding	2.9042	-0.6286	-0.31754	0.0149956	0.149003	0.0253152
ATP5E	protein_coding	5.775	-0.48326	-0.08014	0.0150024	0.649695	0.0176899
ATP5C1	protein_coding	6.6498	-0.39986	-0.31739	0.0150069	0.0314226	0.0190666
ACRC	protein_coding	0.8711	0.78858	1.1945	0.0150437	0.00063648	0.00169942
UBE2L3	protein_coding	5.7577	-0.40234	-0.34192	0.0150487	0.0233424	0.0172856
EIF2B3	protein_coding	4.8065	-0.51089	-0.57922	0.0150814	0.00518335	0.00792355
EZH1	protein_coding	3.8848	0.46109	0.53146	0.0151466	0.00456412	0.00732435
COQ2	protein_coding	3.9743	-0.54355	-0.76699	0.0151658	0.00132953	0.00309107
NOLC1	protein_coding	6.8675	-0.39034	-0.55155	0.0151823	0.00115061	0.00272637
MRPL3P1	processed_pseudogene	3.6008	-0.46379	-0.65565	0.0151823	0.0013273	0.0030798
ENSA	protein_coding	6.2578	-0.45889	-0.29517	0.0151845	0.0720498	0.0238893
RGS7BP	protein_coding	0.7514	-0.93936	-0.78591	0.0151907	0.0289935	0.018766
USP4	protein_coding	5.8197	0.3666	0.1273	0.0151907	0.324073	0.0236594
EFCAB13	protein_coding	2.1652	0.6996	0.88936	0.0152156	0.00242533	0.00483823
HNRNPF	protein_coding	6.984	-0.38707	-0.67139	0.0153547	0.00024601	0.00074276
OAS1	protein_coding	1.2002	0.77806	0.60141	0.0153623	0.038134	0.0207466
NSDHL	protein_coding	4.6474	-0.54557	-0.13635	0.0153623	0.481783	0.021067
VIPAS39	protein_coding	4.687	0.40388	0.27284	0.0153623	0.0634084	0.0235893
LGR4	protein_coding	1.4068	-0.76109	-0.40972	0.0153623	0.125923	0.025733
UQCRQ	protein_coding	4.9966	-0.55548	-0.17066	0.0153847	0.382149	0.0229125
LRIG2	protein_coding	4.0475	0.48557	0.59819	0.0153886	0.00305467	0.00568023
MLTK	NA	6.0346	-0.38517	-0.67811	0.0153928	0.00023381	0.00070914
ZDHHC9	protein_coding	6.1334	0.38258	0.44845	0.0153928	0.00407528	0.0069065
CCT5P1	processed_pseudogene	1.6361	-0.66237	-1.0897	0.0154261	0.00057865	0.00155386
CEP57L1	protein_coding	3.2385	-0.49432	-0.6859	0.0154355	0.00153303	0.00348764
HOOK2	protein_coding	0.7488	0.86456	0.91815	0.0154371	0.0076841	0.0100937
SLC25A45	protein_coding	-0.2383	1.08799	1.06422	0.0154508	0.0124988	0.0130845
SEPHS1	protein_coding	4.9928	-0.46277	-0.54795	0.0155228	0.00410312	0.00697024
FBL	protein_coding	7.0346	-0.6024	-0.77957	0.0155238	0.00219729	0.00448428
AADAC	protein_coding	0.0349	1.43731	2.3305	0.0155653	0.0003611	0.00105003
ARPC5L	protein_coding	5.3993	-0.51526	-0.26081	0.0155754	0.152016	0.0262949
XRCC6	protein_coding	6.9657	-0.4296	-0.63272	0.0155822	0.00088956	0.00223847
ZNF841	protein_coding	3.3043	0.49003	0.56772	0.015632	0.00460138	0.00748065
RP11-436M15.4	NA	1.2874	-0.65897	-0.61076	0.015632	0.0173095	0.0154676
ITPR2	protein_coding	7.2301	-0.35848	-0.06468	0.0156498	0.622869	0.0189147
CHCHD7	protein_coding	5.2757	-0.47425	-0.19828	0.0156798	0.234567	0.0258285
BTBD6	protein_coding	4.3742	-0.46664	-0.23518	0.0156798	0.154965	0.0264781
TMEM127	protein_coding	4.8252	0.41765	0.45944	0.0156812	0.00630098	0.00908527
PARD3B	protein_coding	5.2732	0.4147	0.43201	0.0156812	0.00854991	0.0108931
NDUFAF2	protein_coding	3.6944	-0.54935	-0.44187	0.0157932	0.0320101	0.0199679
TAF11	protein_coding	4.4745	-0.49128	-0.26187	0.0158147	0.133609	0.0265777
ARHGAP19	protein_coding	4.5993	-0.64291	-1.02451	0.0158167	0.00060587	0.00163291
MTHFD2	protein_coding	5.1933	0.52859	-0.63413	0.0158327	0.00458503	0.00013712
RPP30	protein_coding	4.5963	-0.42604	-0.58477	0.0158509	0.00163625	0.00369758
FRAS1	protein_coding	2.8157	0.59923	0.989	0.0158538	0.00036764	0.00106285
ZNF600	protein_coding	2.862	0.52523	0.52368	0.0158538	0.0114487	0.0127155
CLEC1A	protein_coding	3.3958	-0.56163	-0.4164	0.0158538	0.0447974	0.022222
SSX2IP	protein_coding	3.5887	-0.50994	-1.02664	0.0158893	0.0001006	0.0003298
CTH	protein_coding	1.0384	0.97504	-0.06129	0.0158893	0.880825	0.0102354
ARSB	protein_coding	4.7295	-0.40397	-0.19938	0.0158893	0.16483	0.0267992
RIN1	protein_coding	1.4393	0.73145	0.68797	0.0159728	0.0157065	0.0150168
CRTAC1	protein_coding	2.2174	-0.62995	-0.63365	0.015973	0.0114442	0.0127676
RP2	protein_coding	5.1924	-0.4545	-0.39113	0.015973	0.0234222	0.0180569
YBX1	protein_coding	9.1421	-0.41447	-0.32116	0.015973	0.0364508	0.021067
C3orf52	protein_coding	2.9475	0.62561	0.41675	0.015973	0.0701272	0.0248924
HNRNPA3	protein_coding	8.1215	-0.49514	-0.51518	0.0159939	0.00854431	0.0109489
TOMM40	protein_coding	2.9922	-0.60496	-0.58332	0.0160139	0.0141434	0.0142643
GIMAP7	protein_coding	4.2896	-0.49532	-0.29357	0.0160139	0.0988769	0.0263109
BEND3	protein_coding	2.7552	-0.55732	-0.38278	0.016072	0.0603211	0.0242747
FLT1	protein_coding	7.986	-0.35598	0.07686	0.0160838	0.553154	0.00616312
DNAJC9	protein_coding	1.87	-0.61257	-0.69042	0.0160838	0.00632587	0.00921381
CALD1	protein_coding	8.5559	-0.34872	-0.07675	0.0160838	0.545202	0.021067
LSM5	protein_coding	3.762	-0.55069	-0.90658	0.016125	0.00050677	0.00138762
GSTCD	protein_coding	3.5465	-0.57176	-0.76711	0.0161256	0.00208611	0.00440032
PRKCDBP	protein_coding	4.5047	-0.59502	-0.18725	0.0161256	0.374308	0.0243483
LSS	protein_coding	4.6432	-0.48543	0.34377	0.0161517	0.0494008	0.00085018
SCARNA9	antisense	0.4083	-0.72629	-1.24278	0.0161517	0.00052518	0.00143371
MMP14	protein_coding	5.6668	0.44334	0.64836	0.0161535	0.00097867	0.00242613
SEC13	protein_coding	6.572	-0.44029	-0.00735	0.016214	0.966929	0.0131217
PGF	protein_coding	4.8071	0.56244	0.81791	0.0162157	0.00102231	0.00250612
SLC6A15	protein_coding	0.624	0.8955	0.03328	0.0162351	0.932486	0.013837
ACOT13	protein_coding	5.0159	-0.45727	-0.05697	0.0162351	0.743789	0.0175958
TRIM3	protein_coding	2.704	0.5554	0.62925	0.0162476	0.0055672	0.00858231
ZNF767	NA	3.3219	0.50856	0.621	0.0162486	0.00346696	0.00636906
PKP2	protein_coding	2.3046	-0.53215	-0.32644	0.0162782	0.0908064	0.0264873
ADAMTS7	protein_coding	4.0187	0.5808	0.97433	0.0163473	0.00034119	0.00100189
MARK4	protein_coding	3.703	0.49901	0.70846	0.0163473	0.00123438	0.00296226
SVIL	protein_coding	5.8934	0.35578	0.49626	0.0163473	0.00138421	0.00325396
CDK20	protein_coding	-0.1236	0.98148	1.03445	0.0163473	0.00865312	0.0111907
TRAF1	protein_coding	-0.0583	1.03801	1.05258	0.0163473	0.0109173	0.0126086
CBFB	protein_coding	6.0942	-0.44124	-0.39676	0.0163473	0.0193074	0.0168406
DAD1	protein_coding	6.9444	-0.36966	-0.09961	0.0163473	0.453883	0.0232698
RNF144A	protein_coding	2.8708	-0.70613	-0.40355	0.0163473	0.109518	0.0271165
ITGAE	protein_coding	3.5671	-0.61099	-0.08128	0.0164015	0.72268	0.0181947
MRTO4	protein_coding	4.3389	-0.59663	-0.71012	0.0164253	0.0044417	0.00745751
ORAI3	protein_coding	1.2969	0.84385	0.81974	0.0164848	0.0137586	0.0143504
ZNF408	protein_coding	0.7639	0.80074	0.32454	0.0165231	0.274735	0.0267992
MRPL47	protein_coding	4.6895	-0.47773	-0.47967	0.0165525	0.0114786	0.0130733
MAVS	protein_coding	4.3332	0.46714	0.51462	0.0165535	0.00668787	0.00968191
ZNF654	protein_coding	3.8088	0.64935	0.08335	0.0165535	0.745856	0.0179633
HNRNPH1P3	processed_pseudogene	1.6134	-0.63719	-0.15856	0.0165535	0.487516	0.0228907
ZNF562	protein_coding	5.0924	0.41591	0.19098	0.0165535	0.202564	0.027804
RHBDL2	protein_coding	0.4293	0.89655	1.15541	0.0166044	0.00242533	0.004998
NRM	protein_coding	3.7203	-0.51355	-0.7594	0.0166103	0.00111669	0.00272637
P4HA2	protein_coding	4.4593	0.44256	0.53943	0.0166103	0.00360479	0.00658807
SCN3B	protein_coding	0.5572	1.07162	1.19908	0.0166103	0.00609403	0.00916726
TBC1D8B	protein_coding	3.5119	-0.57077	-0.058	0.0166103	0.791807	0.0171289
HMGN2P3	processed_pseudogene	1.2724	-0.81427	-1.40372	0.0166225	0.00053328	0.00146524
SAMD4A	protein_coding	6.4732	0.37501	0.5889	0.0166225	0.00060137	0.00163291
GCSAM	protein_coding	0.7738	0.87226	0.84984	0.0166225	0.0138901	0.0145124
PSMA5	protein_coding	6.7682	-0.45951	-0.43495	0.0166225	0.0150617	0.0151726
RP11-543N12.1	antisense	1.1093	0.87836	0.67352	0.0166225	0.0430715	0.0229293
WARS	protein_coding	5.9719	0.37392	0.11016	0.0166225	0.414856	0.0244777
SLC38A9	protein_coding	3.3091	0.51957	0.31458	0.0166225	0.09961	0.0274531
FAM184A	protein_coding	0.561	-0.90126	-0.85011	0.0166947	0.0166666	0.0159844
CEP152	protein_coding	4.6871	-0.46172	-1.39765	0.0167642	3.75e-06	1.12e-05
AC019097.7	processed_pseudogene	4.549	-0.61476	-0.97627	0.0168067	0.00068378	0.00183708
CNNM2	protein_coding	0.8476	0.85225	0.70608	0.0168067	0.0314948	0.0209197
KIAA1614	protein_coding	0.4253	1.04828	0.67258	0.0168067	0.0868825	0.0271286
CTD-2292M16.8	lincRNA	0.1315	0.99721	0.47797	0.0168067	0.196215	0.0283405
B3GNT5	protein_coding	4.7869	-0.39142	-0.48113	0.0168234	0.00364957	0.00670745
ZNF772	protein_coding	2.8998	0.5481	0.5732	0.0168234	0.00928926	0.011788
TNKS	protein_coding	6.3464	0.38431	0.28802	0.0168234	0.0445749	0.0234437
HHIP	protein_coding	10.6139	-0.35357	0.36375	0.0168269	0.00960838	0.00024544
GNAI3	protein_coding	7.3211	-0.38324	-0.46517	0.0168525	0.00367601	0.00674362
RP11-334C17.5	antisense	0.1436	1.31716	1.56056	0.0168632	0.00422426	0.00729881
BCCIP	protein_coding	6.4801	-0.51145	-0.5928	0.0168864	0.00493374	0.00812499
TUB	protein_coding	2.4363	-0.6581	-0.51509	0.0169296	0.0386064	0.0225027
RP11-359M6.3	NA	1.8028	0.63093	0.90511	0.0169934	0.0011928	0.00291139
ATG16L2	protein_coding	3.1877	0.52691	0.69932	0.0169934	0.00212638	0.00451838
AGPAT5	protein_coding	5.6429	-0.40595	-0.69393	0.0170256	0.00036214	0.00106118
CTPS1	protein_coding	5.6784	-0.40671	-0.49672	0.0170451	0.00371841	0.00683148
RING1	protein_coding	3.6731	0.50071	0.42377	0.0170723	0.0280314	0.0203039
SPRED2	protein_coding	3.1383	0.53097	0.29906	0.0170723	0.126472	0.0287366
TPI1	protein_coding	6.7005	-0.5741	-0.511	0.0171354	0.0210964	0.0181188
SNRNP35	protein_coding	3.4517	-0.51789	-0.466	0.0171921	0.0211441	0.0181746
CTD-2302E22.3	NA	1.9042	-0.67419	-1.06904	0.0172141	0.00081047	0.00212217
VAMP1	protein_coding	1.4965	0.63976	0.87267	0.0172487	0.00176067	0.00396456
AC012318.3	NA	2.4567	-0.57121	-0.37887	0.0172852	0.0721713	0.026891
POLH	protein_coding	5.2295	0.38465	0.23496	0.0173079	0.096456	0.028256
MAPRE1	protein_coding	6.8189	-0.43593	-0.51602	0.0173187	0.00446043	0.00763626
RAB2A	protein_coding	6.07	-0.36226	-0.15097	0.0173414	0.245968	0.0287366
OAT	protein_coding	5.083	-0.4504	-0.16221	0.0173664	0.316045	0.0275822
CEP128	protein_coding	5.1422	-0.60166	-1.29078	0.0173892	6.65e-05	0.00021817
RLIMP1	processed_pseudogene	2.5168	0.56944	0.85906	0.0174444	0.00086413	0.00223847
ZNF182	protein_coding	2.154	0.61454	0.45943	0.0175257	0.0491788	0.0247979
CD27-AS1	processed_transcript	1.1555	0.78387	0.64295	0.0175378	0.0336526	0.0219649
PHF8	protein_coding	4.7436	0.43419	0.24385	0.0175378	0.12635	0.0292029
PLEKHG1	protein_coding	4.9568	0.47977	0.75305	0.0175861	0.00064624	0.0017716
CHEK2	protein_coding	3.3186	-0.58111	-0.82281	0.0175861	0.00163446	0.00380221
SUMO3	protein_coding	5.6529	-0.4924	-0.53738	0.0175861	0.00758765	0.0107425
HS1BP3	protein_coding	3.0535	0.54731	0.35599	0.0175861	0.0820188	0.0279567
MKS1	protein_coding	2.0724	0.68482	0.29686	0.0175861	0.24182	0.0290148
ZNF568	protein_coding	2.106	0.59206	0.30705	0.0175861	0.161661	0.0295779
EPB41L3	protein_coding	7.154	-0.34996	-0.02799	0.0176043	0.840439	0.0172856
LTBP3	protein_coding	3.1321	0.55528	0.95776	0.0176168	0.00030495	0.00091857
POLL	protein_coding	2.8093	0.55766	0.46971	0.0176168	0.0296722	0.0211095
DMPK	protein_coding	1.2635	0.85062	0.96911	0.0176526	0.00586795	0.00921318
TRPV4	protein_coding	2.242	0.59931	0.39223	0.0176526	0.0809575	0.0279947
PARP2	protein_coding	5.6951	-0.41438	-0.90815	0.0176537	5.04e-05	0.00016767
WDR31	protein_coding	-0.5131	1.17488	0.86038	0.0176537	0.0544432	0.0256863
LYRM2	protein_coding	4.6708	-0.43352	-0.50761	0.0176727	0.00520772	0.00858225
FBN1	protein_coding	6.3205	-0.36444	0.42053	0.0177374	0.00512435	0.00016391
C12orf76	protein_coding	3.0013	0.58373	0.5277	0.0177374	0.0214369	0.0185943
NUDT1	protein_coding	3.2034	-0.71807	-0.7742	0.0177548	0.00879703	0.0117359
CIT	protein_coding	5.5284	-0.58866	-1.09193	0.0177912	0.00021201	0.00065929
NOP16	protein_coding	4.9199	-0.56658	-0.61612	0.0177912	0.00803407	0.0111818
BBS4	protein_coding	3.2074	0.48607	0.06336	0.017794	0.745037	0.0194387
LINC00961	lincRNA	3.5257	-0.45184	-0.28209	0.0178279	0.0907167	0.0287835
R3HDM2	protein_coding	4.2004	0.41389	0.34253	0.0178354	0.0319865	0.0218591
IGFBP1	protein_coding	0.2192	-0.91316	-0.96099	0.0178444	0.0109093	0.0132672
CDC27	protein_coding	6.5334	-0.37865	-0.56392	0.0178683	0.0010224	0.00257187
MYL12B	protein_coding	8.4738	-0.3855	-0.11344	0.0178683	0.419632	0.0264333
ANXA2P1	processed_pseudogene	3.4582	-0.44372	-0.28167	0.0178839	0.086453	0.0287366
SMAGP	protein_coding	3.9846	-0.45515	-0.66803	0.017888	0.00129646	0.0031594
UMPS	protein_coding	5.0945	-0.49667	-0.72241	0.017888	0.00130626	0.00318611
WDR59	protein_coding	4.0977	0.46938	0.35595	0.017888	0.0464463	0.0248867
TMEM60	protein_coding	3.8395	-0.42631	-0.64185	0.0179274	0.00108884	0.00272509
PLD3	protein_coding	4.6548	0.50915	0.73959	0.0179425	0.00119145	0.00294907
CKAP5	protein_coding	7.9829	-0.42758	-0.74529	0.0179573	0.00030692	0.00092542
NTAN1	protein_coding	5.3639	-0.39398	-0.12817	0.0179714	0.371079	0.0275955
SRP72	protein_coding	6.9722	-0.35633	-0.52618	0.0179869	0.00108123	0.00271258
KATNAL1	protein_coding	5.8487	-0.349	-0.29834	0.0179869	0.0270349	0.020758
CWF19L1	protein_coding	3.5764	-0.64858	-0.38226	0.0179869	0.108069	0.0295992
NUP50	protein_coding	6.536	-0.44771	-0.66416	0.0180319	0.00107124	0.00269782
NUP37	protein_coding	4.3089	-0.52973	-0.71973	0.0180319	0.00220352	0.00474487
BLOC1S3	protein_coding	2.5869	0.558	0.35045	0.0180848	0.0940723	0.0292247
ABCB9	protein_coding	1.3808	0.70942	0.57072	0.0181326	0.0379075	0.023625
HSPD1P5	processed_pseudogene	1.2289	-0.71482	-0.61622	0.0181571	0.0278711	0.0210958
SLC35E2B	protein_coding	4.775	0.41181	0.54089	0.018201	0.00248048	0.00523264
LINC00702	lincRNA	0.1949	-1.20597	-1.50215	0.018201	0.00396091	0.00721492
ZMIZ2	protein_coding	4.6578	0.46066	0.55515	0.0182644	0.00434689	0.00766208
TNFSF10	protein_coding	1.5374	-0.98907	-0.61616	0.0183808	0.0901041	0.0293613
RP4-592A1.2	processed_pseudogene	4.7129	-0.38385	-0.43014	0.0183881	0.00702101	0.0104973
NUP107	protein_coding	5.7566	-0.44817	-1.07517	0.0183916	2.44e-05	8.29e-05
TCEB1	protein_coding	4.9471	-0.41587	-0.31495	0.0183916	0.046273	0.0254074
FOSL2	protein_coding	5.7663	0.40566	0.17046	0.0184116	0.250465	0.0302523
CADPS2	protein_coding	4.9768	-0.40295	-0.25788	0.0184124	0.0850867	0.0292029
LINC00894	antisense	1.2101	0.82736	1.39032	0.0184136	0.00038771	0.00113024
ITGA10	protein_coding	4.3071	-0.52215	0.1299	0.0184136	0.496688	0.00649555
FOXO4	protein_coding	-0.0395	0.89661	0.94417	0.0184358	0.00997303	0.012908
GMPS	protein_coding	5.8219	-0.413	-0.67587	0.018443	0.00056285	0.00155997
RPF1	protein_coding	4.3399	-0.41061	-0.70216	0.0185077	0.00044682	0.00127979
ELMO1	protein_coding	4.5071	0.39428	0.54548	0.0185077	0.00177932	0.00408435
GOLT1B	protein_coding	4.7988	-0.43745	-0.45826	0.0185077	0.0103515	0.0131831
ZNF627	protein_coding	2.851	0.51998	0.51208	0.0185077	0.0145163	0.0158773
CD82	protein_coding	0.4418	0.90418	0.43721	0.0185249	0.202529	0.0310966
C16orf80	NA	4.4842	-0.5674	-0.65117	0.0186183	0.00634185	0.00990137
RMI2	protein_coding	2.6444	-0.75018	-1.28068	0.0186589	0.00055916	0.00155386
TMEM167B	protein_coding	4.1258	0.55478	0.17709	0.0187042	0.395558	0.0282379
TIMM8B	protein_coding	4.7813	-0.59422	-0.44628	0.0187903	0.0485445	0.0262069
TMBIM4	protein_coding	4.7806	-0.39639	-0.25163	0.0187903	0.0885201	0.0298722
SAMD14	protein_coding	-0.1488	1.07282	1.50096	0.0187942	0.00153844	0.00369758
EHD4	protein_coding	7.263	-0.35067	-0.16669	0.0187942	0.19359	0.031553
HSP90B1	protein_coding	10.3075	-0.39093	-0.45057	0.0188068	0.0057115	0.00930595
JUP	protein_coding	5.134	0.4657	0.85476	0.018845	0.00020961	0.00065551
SH3BGRL2	protein_coding	5.0399	-0.43523	-0.48432	0.018845	0.00752544	0.0110441
RAB11FIP1	protein_coding	1.3966	0.5892	-0.04343	0.018845	0.863477	0.0121008
ZNF608	protein_coding	4.7298	-0.45569	-0.03871	0.018845	0.83301	0.0187901
RP11-529H20.3	processed_pseudogene	1.5582	-0.70897	-0.89448	0.0188599	0.00410312	0.00750949
KIAA0020	protein_coding	5.4174	-0.37835	-0.56638	0.0188807	0.00112468	0.00281312
RP11-421N8.1	processed_pseudogene	4.3451	-0.4292	-0.34244	0.0188997	0.0386064	0.0244701
RPL39L	protein_coding	2.7569	-0.8099	-1.20808	0.0190052	0.00139806	0.00341308
MED12	protein_coding	5.0271	0.37701	0.44066	0.0190235	0.00548191	0.0091455
KSR2	protein_coding	6.5147	-0.38782	-0.07411	0.0190335	0.616255	0.0238128
CTDSPL2	protein_coding	4.7874	-0.44085	-0.83242	0.019059	0.00021201	0.00066433
ARRB1	protein_coding	4.7571	0.40835	0.50995	0.0191427	0.00367601	0.00703079
SMCR8	protein_coding	4.5197	0.38459	0.22818	0.0191777	0.1136	0.0314503
FTH1P23	processed_pseudogene	1.8749	0.77173	0.6449	0.019202	0.0334257	0.0234915
SEC24D	protein_coding	7.0661	-0.35851	-0.05966	0.0192778	0.66706	0.0229507
TTC14	protein_coding	4.1626	0.48169	0.33067	0.0192778	0.0712028	0.0293033
TBC1D19	protein_coding	3.0483	0.49783	0.29942	0.0193244	0.111403	0.0315778
COA4	protein_coding	5.4728	-0.49412	-0.39709	0.0193262	0.0374609	0.0245895
LTBP2	protein_coding	8.2716	-0.35936	0.41772	0.0193879	0.00555079	0.00018337
PDLIM7	protein_coding	5.1637	0.41188	0.58128	0.0193879	0.00162224	0.00386168
GSTA4	protein_coding	3.8127	-0.53905	0.07267	0.0193879	0.728218	0.0101224
ZNF180	protein_coding	2.3623	-0.54193	-0.6225	0.0193879	0.00686115	0.0106026
ADCK3	protein_coding	2.4322	0.60117	0.37424	0.0193879	0.101209	0.0313143
MYLIP	protein_coding	3.7037	0.45395	0.3243	0.0194159	0.0623469	0.0287366
MRPL14	protein_coding	4.35	-0.6271	-0.43373	0.0194468	0.0672876	0.0291847
EPHA2	protein_coding	6.0472	0.46423	0.45461	0.0194588	0.0149421	0.0166379
RP11-301G21.1	processed_pseudogene	1.5383	-0.65743	-0.42227	0.0194588	0.087375	0.0306795
HYLS1	protein_coding	3.5987	-0.55692	-0.83798	0.0194749	0.00125146	0.00313739
RP11-142L4.3	processed_pseudogene	5.0316	-0.44007	-0.77132	0.0195249	0.00038647	0.00113047
NEK10	protein_coding	2.1863	0.69224	1.65515	0.0195595	1.84e-05	6.22e-05
CCDC121	protein_coding	0.4041	-0.84105	-0.95684	0.0195685	0.00779532	0.0114444
VILL	protein_coding	1.175	0.72092	0.69464	0.0195738	0.0174656	0.0180725
CASP12	polymorphic_pseudogene	-0.4065	-1.14546	-0.34122	0.0196234	0.412766	0.0291788
C14orf80	protein_coding	0.8448	-0.81979	-1.24891	0.0196376	0.00158295	0.0038141
SRSF4	protein_coding	6.9859	-0.38371	-0.32885	0.0196447	0.0283718	0.0223866
DRP2	protein_coding	1.3273	0.7724	0.57916	0.0196447	0.0542525	0.0279714
ACYP1	protein_coding	3.9025	-0.63992	-0.77841	0.0196594	0.00483185	0.00853244
IRF7	protein_coding	0.3174	0.8189	0.64849	0.0196594	0.0439473	0.0262949
UBE2E3	protein_coding	5.7238	-0.4207	-0.3127	0.0197245	0.0521775	0.0277307
RP11-321A17.3	processed_pseudogene	2.6082	-0.72828	-0.20597	0.019755	0.443732	0.0287853
TXNDC17	protein_coding	4.6366	-0.50482	-0.31682	0.0197592	0.0947431	0.0315575
STS	protein_coding	3.5589	-0.45824	-0.06469	0.0198465	0.718281	0.0224843
NOL5BP	NA	0.0045	-0.96996	-0.71468	0.0198489	0.0525199	0.0279223
POLE4	protein_coding	3.8471	-0.65284	-0.47095	0.0198842	0.05902	0.0288236
C3orf70	protein_coding	-0.2448	-1.06055	-0.48468	0.0198842	0.20804	0.0332524
RP11-314A15.2	processed_pseudogene	2.3288	-0.58089	-0.27443	0.0199063	0.200581	0.0333555
SASH1	protein_coding	7.7696	0.40619	0.27798	0.0199342	0.0701851	0.0300605
HIST1H2BL	protein_coding	-0.1517	-1.00322	-2.25089	0.0199665	0.00015722	0.00050238
AGO4	protein_coding	4.2596	0.4342	0.54615	0.0199665	0.00369322	0.00715925
C1RL-AS1	antisense	0.1725	0.89333	1.07873	0.0200083	0.00477035	0.00850918
MORF4L1P1	processed_pseudogene	6.3347	-0.38474	-0.37987	0.0200083	0.0147379	0.016794
INCENP	protein_coding	3.8795	-0.57061	-1.23056	0.0200543	9.15e-05	0.00029788
RNASEH2A	protein_coding	3.5074	-0.6168	-1.14536	0.0200543	0.00030641	0.00093252
RIMS1	protein_coding	0.4534	-0.93511	-0.67999	0.0200543	0.0560437	0.0287366
UBE2S	protein_coding	2.4945	-0.76936	-0.95989	0.0200857	0.00456522	0.00827585
CTD-2619J13.14	lincRNA	1.0566	0.69071	0.68455	0.0200857	0.0154609	0.0173005
EEF2	protein_coding	9.6933	0.39336	0.29893	0.0200857	0.0478273	0.0274546
NBPF10	protein_coding	4.9868	0.37174	0.40644	0.0201144	0.00865237	0.0123866
CSRP2	protein_coding	1.6409	-0.70107	-1.08438	0.0201314	0.00120565	0.00306372
GS1-257G1.1	processed_pseudogene	2.8741	-0.47549	-0.47325	0.0201578	0.0151737	0.0171618
TLR3	protein_coding	1.545	0.77158	0.15136	0.0201578	0.628161	0.025102
AMY2B	protein_coding	0.1845	0.94422	1.73598	0.0201915	0.00020351	0.00063898
NDST1	protein_coding	5.591	0.42616	0.54427	0.0201915	0.00336292	0.00675822
EGFR	protein_coding	4.477	0.39582	0.03566	0.0201915	0.829271	0.0204196
NDUFA1	protein_coding	5.106	-0.49795	-0.18005	0.0201915	0.32902	0.0319879
FMN1	protein_coding	-0.5798	-1.05975	-0.50708	0.0201915	0.190248	0.0339715
AC058791.1	lincRNA	4.4613	0.56469	0.5154	0.0202959	0.0228008	0.0209197
ADAM17	protein_coding	5.0594	0.3801	0.27164	0.0203051	0.0630364	0.0297586
RNF19B	protein_coding	4.2847	0.42651	0.04653	0.0203095	0.792004	0.0213887
CALM2P3	processed_pseudogene	1.3848	-0.65168	-0.7361	0.0204448	0.00828117	0.0121626
MTND6P4	processed_pseudogene	2.8127	-0.79727	-0.62413	0.0204448	0.0416564	0.0266392
SPTLC2	protein_coding	6.7771	-0.34868	-0.16263	0.0204448	0.209164	0.034237
NRK	protein_coding	1.9863	-0.7485	-0.04716	0.0205042	0.875144	0.0195304
HELZ2	protein_coding	0.9934	0.74741	0.68082	0.0205837	0.0239538	0.0215031
KIAA1279	NA	5.3031	-0.35326	-0.58323	0.0206311	0.00062927	0.00177484
RAD54L	protein_coding	2.3793	-0.66868	-1.1222	0.0206311	0.00070589	0.00195848
KPNA3	protein_coding	6.276	-0.37103	-0.37105	0.0206311	0.0143484	0.0168084
TTN	protein_coding	5.6282	0.38095	0.57115	0.0206732	0.00116188	0.00296883
RP11-231C14.4	protein_coding	3.2827	0.59841	0.82511	0.0206732	0.00210624	0.00477212
ZNF200	protein_coding	3.1432	-0.45771	-0.4569	0.0206732	0.0153252	0.0175152
MTMR12	protein_coding	5.955	-0.35361	-0.3053	0.0206732	0.029094	0.0234614
CFDP1	protein_coding	5.4295	-0.3943	-0.3291	0.0206732	0.0339186	0.0248875
RRP36	protein_coding	5.0989	-0.42744	-0.29132	0.0206732	0.074121	0.0313665
RCC2P6	processed_pseudogene	1.4295	-0.6061	-0.44573	0.0206832	0.0577712	0.0295428
USO1	protein_coding	7.6199	-0.35	-0.13104	0.0206832	0.314447	0.033062
C1orf198	protein_coding	4.3925	-0.43277	-0.18551	0.0206832	0.249479	0.034237
ATP5F1	protein_coding	6.8338	-0.35998	-0.32576	0.0207396	0.0232678	0.0213708
PTPRK	protein_coding	6.9287	0.33443	0.19238	0.0207396	0.126038	0.034282
ATXN7L1	protein_coding	3.5417	0.48204	0.48216	0.020788	0.014967	0.0173528
TMEM126B	protein_coding	5.189	-0.40172	-0.51398	0.0208899	0.00367669	0.00721492
WASH7P	unprocessed_pseudogene	1.8542	0.62885	0.58682	0.0208899	0.021644	0.0207466
MPP6	protein_coding	4.4848	-0.38873	-0.37482	0.0208913	0.0181074	0.0190159
RELB	protein_coding	-0.0646	0.89576	0.52584	0.0209362	0.131416	0.0346684
DDX46	protein_coding	7.1396	-0.32431	-0.5524	0.0209681	0.00047108	0.00135655
MAMDC4	protein_coding	-0.4507	0.99191	0.49136	0.0209681	0.201956	0.0352117
NDUFC1	protein_coding	4.2233	-0.45107	-0.11166	0.0209878	0.516226	0.0289168
RPA2	protein_coding	4.5698	-0.646	-0.83874	0.0209979	0.00355013	0.00707877
RP11-380M21.2	processed_pseudogene	3.3796	-0.45558	-0.25999	0.0210084	0.13076	0.0348164
ANKRD20A2	protein_coding	1.1077	0.78958	0.4843	0.0210374	0.114632	0.034376
AC006129.1	lincRNA	-0.3989	1.18183	0.6887	0.0210374	0.134288	0.0349451
CCT2	protein_coding	7.3377	-0.39829	-0.64263	0.0210587	0.00070589	0.00196522
HSPA8P5	processed_pseudogene	3.286	-0.53894	-0.88325	0.0210587	0.00081047	0.00220415
TMSB15A	protein_coding	-0.4106	-1.17002	-1.75917	0.0210587	0.00177136	0.00421221
TUBE1	protein_coding	3.6284	0.53848	-0.23195	0.0210587	0.268564	0.00424913
SELK	protein_coding	4.4959	-0.59755	-0.52361	0.0210587	0.0282223	0.0234915
PLAUR	protein_coding	6.1388	-0.41325	-0.1637	0.0210587	0.289425	0.0342438
KALRN	protein_coding	4.1125	0.46752	0.84211	0.021064	0.00029534	0.00090479
LPIN1	protein_coding	6.8003	-0.33279	0.0216	0.0211258	0.876046	0.0141185
SRPRB	protein_coding	6.3572	-0.40851	-0.47054	0.0211578	0.00675223	0.0109196
PCMT1	protein_coding	5.643	-0.41423	-0.50441	0.0211818	0.00498517	0.00898096
ACTG1	protein_coding	10.2575	-0.4005	-0.10059	0.0211845	0.511294	0.0293433
DUSP1	protein_coding	4.2909	0.53407	0.62229	0.0211974	0.0064186	0.0106064
PIF1	protein_coding	2.562	-0.72283	-1.11512	0.0212067	0.00131121	0.00331032
C9orf91	protein_coding	2.7694	0.53536	0.15274	0.0212067	0.465653	0.0305031
MRAS	protein_coding	3.2887	0.49058	0.99135	0.0212391	0.00010924	0.00035203
EXD2	protein_coding	4.6711	0.38562	0.13933	0.0212391	0.343082	0.0334695
EHD3	protein_coding	3.3091	-0.73719	0.24116	0.0212872	0.374397	0.00579585
CEP192	protein_coding	6.0543	-0.33981	-0.63686	0.0213636	0.00024021	0.00074395
FSTL3	protein_coding	3.6756	0.48609	0.8452	0.0213636	0.00039771	0.00116612
PDE2A	protein_coding	2.4856	0.64523	0.97849	0.0214064	0.00112183	0.00288831
ZBTB40	protein_coding	5.1671	0.36967	0.33294	0.0214064	0.0253063	0.0226412
NANP	protein_coding	3.592	-0.531	-0.45334	0.0214064	0.0324995	0.0251277
PCBP4	protein_coding	2.5641	0.55173	0.73137	0.0214363	0.00291025	0.00614444
ADAMTS3	protein_coding	1.0303	-0.69542	-0.85366	0.0214363	0.00560284	0.00975112
AJUBA	protein_coding	5.0728	0.50525	0.57288	0.0214363	0.00759014	0.0117455
AC017048.3	NA	2.1431	-0.6246	-0.55548	0.0214363	0.0279741	0.0236959
PLXNA3	protein_coding	3.3557	0.56578	1.2285	0.0214738	5.84e-05	0.00018948
CEP170B	protein_coding	3.2464	0.56805	0.71953	0.0214738	0.00388508	0.00757406
RP11-144L1.8	processed_pseudogene	0.5386	-0.89005	-1.15428	0.0214738	0.00463349	0.00858231
PICK1	protein_coding	1.0319	0.74979	0.77941	0.0214738	0.0127357	0.0161527
EEF1A1P12	processed_pseudogene	2.7252	-0.61589	-0.61127	0.0214876	0.0164906	0.0185943
PALD1	protein_coding	3.6686	-0.5442	0.03037	0.0215276	0.893583	0.0149068
IPO13	protein_coding	3.3336	0.46245	0.41461	0.0215276	0.0267665	0.0233527
CARHSP1	protein_coding	2.8808	-0.49468	-0.39337	0.0215276	0.0442202	0.0282975
SPRY1	protein_coding	2.167	-0.62981	-0.48208	0.0215276	0.0513463	0.0295395
NCKAP5L	protein_coding	2.8783	0.60652	0.88018	0.0215512	0.00153469	0.00381133
NRAS	protein_coding	7.4235	-0.36659	-0.42119	0.0215835	0.00696442	0.0112138
SAAL1	protein_coding	4.8336	-0.47787	-0.88981	0.021607	0.00029852	0.00091553
ENO1	protein_coding	8.2129	-0.47553	-0.61366	0.021607	0.00342733	0.00699344
ARID3A	protein_coding	1.907	0.83983	0.97343	0.021607	0.00683689	0.0111005
PANX2	protein_coding	0.9016	0.9923	0.87689	0.021607	0.0286238	0.0240545
RSU1	protein_coding	6.6722	-0.3347	-0.09183	0.0216113	0.473777	0.0310966
RN7SKP234	misc_RNA	0.9674	0.80134	0.63254	0.0216379	0.0484156	0.0291847
MESTP1	processed_pseudogene	-0.8132	-0.8758	-1.16686	0.0216904	0.00381851	0.00752888
TMSB4XP8	processed_pseudogene	6.5569	-0.47763	-0.05838	0.0216904	0.762485	0.0238777
KDM4A	protein_coding	4.0964	0.43473	0.31677	0.0216904	0.0629316	0.031553
GPD2	protein_coding	4.799	-0.42281	-0.76529	0.0217041	0.00036797	0.00109778
KSR1	protein_coding	3.7728	0.44817	0.25524	0.0217041	0.139529	0.0362736
RP11-416A17.6	NA	-0.1018	0.92923	1.21263	0.021762	0.00321219	0.00670172
TRIM35	protein_coding	3.4832	0.46908	0.44914	0.021762	0.0197487	0.0204952
RNU6-26P	snRNA	0.9584	0.81225	0.43916	0.021762	0.167977	0.0367802
YBX1P1	processed_pseudogene	6.9944	-0.38767	-0.35709	0.0218014	0.0226012	0.0218104
RP11-295P9.3	processed_transcript	4.3248	0.4698	0.55337	0.0218188	0.0063056	0.0106064
COX6C	protein_coding	5.8983	-0.52516	-0.16393	0.0218188	0.41048	0.033033
CD163L1	protein_coding	2.91	0.46327	0.57318	0.0219049	0.00469835	0.00876238
HNRNPA3P1	processed_pseudogene	1.6161	-0.73019	-0.67238	0.0219409	0.0240832	0.0225756
NUS1	protein_coding	4.4981	-0.38852	-0.3878	0.021967	0.0161719	0.0186266
SUPT7L	protein_coding	5.0366	0.36043	0.20328	0.0220244	0.141839	0.0368342
CFH	protein_coding	3.7689	-0.5075	-0.0658	0.0220526	0.749152	0.0247339
RPH3AL	protein_coding	1.7555	0.58213	0.59097	0.0220571	0.0149646	0.0180206
GNG12	protein_coding	8.4091	-0.37087	-0.37315	0.022202	0.014839	0.0179633
TRMU	protein_coding	4.1876	-0.46686	-0.73727	0.0222831	0.00107208	0.00279054
MAP1A	protein_coding	3.6414	0.43583	0.9429	0.02232	6.78e-05	0.00021992
LOC124685	NA	3.0878	-0.68787	-0.16621	0.02232	0.528249	0.0306506
ENTPD1	protein_coding	4.7291	-0.37067	-0.17312	0.02232	0.21819	0.037511
NES	protein_coding	6.9284	-0.32783	-0.07611	0.0223451	0.55145	0.0300949
HNRNPH3	protein_coding	7.9151	-0.45181	-0.37492	0.0223471	0.0365596	0.0271929
FKBP14	protein_coding	5.5066	-0.39322	-0.26453	0.0223471	0.0821209	0.0344235
APOBEC3G	protein_coding	0.7168	0.79289	0.88381	0.0223514	0.00894209	0.0133802
PPP4R1	protein_coding	6.4912	-0.34791	-0.26765	0.0223748	0.0502177	0.0301774
PMF1	protein_coding	3.0569	-0.52147	-0.37566	0.0223748	0.0654008	0.0326977
NOTCH2	protein_coding	6.6367	0.33969	0.16277	0.0223748	0.206799	0.0376916
CEP85	protein_coding	3.5154	-0.44928	-0.74988	0.0223768	0.00074916	0.00207321
HNRNPK	protein_coding	6.8697	-0.32477	-0.37476	0.0223789	0.0071226	0.0115435
SRI	protein_coding	6.591	-0.50587	-0.31434	0.0224074	0.105211	0.0361237
LINC00116	protein_coding	2.3868	-0.55059	-0.48935	0.022443	0.0289348	0.0248124
MYO15B	protein_coding	0.2756	1.03563	0.79891	0.0224624	0.0544406	0.0310966
LDHAP5	processed_pseudogene	0.3427	-0.82145	-0.97311	0.0224656	0.00740885	0.0118307
SORT1	protein_coding	2.6436	-0.61452	-0.02241	0.0224656	0.932541	0.0203206
MEG3	lincRNA	6.9549	0.46463	1.2909	0.0224793	8.26e-06	2.6e-05
RP3-368A4.6	sense_intronic	3.5756	0.65597	0.94433	0.0224793	0.00176067	0.00426157
RP11-384K6.6	lincRNA	2.9357	0.52681	0.4849	0.0224793	0.0247413	0.023256
FEZ2	protein_coding	5.5086	-0.35193	-0.44931	0.0225179	0.00410188	0.00800251
NDUFB3	protein_coding	4.4118	-0.42347	-0.20655	0.0225812	0.199973	0.0380668
TRIM25	protein_coding	6.9033	0.33358	0.30672	0.0225961	0.0235449	0.0227878
CCDC50	protein_coding	7.1508	-0.33301	-0.22643	0.0227812	0.0793698	0.0347364
RP11-328N19.1	lincRNA	0.706	-0.98318	-0.14883	0.0228053	0.702084	0.026891
RP11-267J23.4	processed_pseudogene	0.2435	-0.91055	-1.39509	0.0228192	0.00176705	0.00428799
LAP3	protein_coding	5.0719	-0.40956	-0.39949	0.0229239	0.0186137	0.0205181
TMEM194A	NA	4.8909	-0.43831	-0.91548	0.0229547	0.00012746	0.00040562
SRP9P1	processed_pseudogene	3.6998	-0.52835	-0.61796	0.0230502	0.00743982	0.0119969
NT5C2	protein_coding	5.2128	-0.36249	-0.05594	0.02306	0.703542	0.0271384
TTC12	protein_coding	1.4475	0.64096	0.49876	0.023145	0.0530682	0.0314593
NPM1	protein_coding	9.2912	-0.47219	-0.71339	0.0231487	0.00129681	0.00332648
PPP2R5C	protein_coding	5.4241	-0.33958	-0.344	0.0231487	0.0154616	0.0186887
DYRK1B	protein_coding	1.6376	0.67343	0.92837	0.0231602	0.00244372	0.00555331
MERTK	protein_coding	5.4946	0.35131	0.35643	0.0231602	0.0152312	0.0185857
ALYREF	protein_coding	4.2119	-0.50909	-0.48658	0.0231842	0.021193	0.0218436
TJAP1	protein_coding	3.2097	0.45775	0.22703	0.0231842	0.202943	0.0387976
CAV1	protein_coding	9.0755	-0.36449	-0.38942	0.0232238	0.0113142	0.0157454
PLXNA1	protein_coding	3.4467	0.45037	0.31596	0.0232238	0.0761296	0.0349646
ADCK4	protein_coding	0.1248	0.95295	0.4872	0.0232238	0.1977	0.0388653
SHMT1	protein_coding	3.3264	-0.56353	-0.71008	0.0233375	0.00490196	0.00920882
ACLY	protein_coding	7.8269	-0.3149	0.00564	0.0233375	0.967024	0.0182836
CALM3	protein_coding	6.0832	-0.40419	-0.04748	0.0233375	0.777035	0.0254865
HARS2	protein_coding	4.4413	0.4	0.32006	0.0233375	0.0462195	0.0302526
ZNF839	protein_coding	2.6026	0.52588	0.31081	0.0233375	0.13196	0.038419
GNAS	protein_coding	9.8372	-0.32526	0.03543	0.0233549	0.793778	0.0138831
NMT2	protein_coding	6.8333	-0.33965	0.00556	0.0233795	0.970071	0.0184127
H3F3A	protein_coding	4.9618	-0.37254	-0.2534	0.0234038	0.0820411	0.0357563
[truncated: 749 more rows]
