# Supplementary material for: Central role of the p53 pathway in the noncoding-RNA response to oxidative stress
Source: Aging (Albany NY). 2017 Dec 12;9(12):2559–86. doi: 10.18632/aging.101341 (PMC5764393; doi:10.18632/aging.101341)
Supplement: Supplementary file 3 [file aging-09-2559-s003.xlsx]

## Sheet: Fuschi et al Dataset S2
Dataset S2. Genes significantly modulated in HUVEC treated with H2O2 for 36 hrs
Gene name	Gene biotype	log2 average expression (cpm)	log2 fold change H2O2 16 hrs	log2 fold change H2O2 36hrs	p.value.adj.H2O2 16 hrs	p.value.adj.H2O2 36 hrs	F.p.value.adj
ASPM	protein_coding	6.8598	-1.025	-2.11581	8.65e-05	1.6e-07	3.2e-07
HIST1H3B	protein_coding	4.0429	-1.36417	-2.98336	3.91e-05	1.6e-07	3.2e-07
CENPE	protein_coding	6.4639	-0.98379	-2.31609	0.00016114	1.6e-07	3.2e-07
DEK	protein_coding	6.4077	-0.87859	-1.82953	8.65e-05	1.6e-07	3.2e-07
SMC4	protein_coding	6.318	-0.76163	-1.83917	0.00024646	1.6e-07	3.2e-07
KIF20B	protein_coding	5.4387	-1.04712	-2.13373	7.6e-05	1.8e-07	4e-07
HIST1H1E	protein_coding	5.1334	-0.63607	-2.53938	0.00715177	2.7e-07	4.1e-07
HIST1H1D	protein_coding	3.6884	-1.78848	-3.16039	3e-05	3.6e-07	7.2e-07
CASC5	protein_coding	5.9034	-0.86637	-1.93884	0.00029608	3.9e-07	9.1e-07
HIST1H3C	protein_coding	1.2112	-1.92312	-3.22966	1.21e-05	4e-07	8e-07
CKAP2	protein_coding	6.2505	-0.81325	-1.55195	0.00011212	4e-07	1.03e-06
KIF11	protein_coding	5.7265	-0.85689	-1.86435	0.00027471	4e-07	1.06e-06
PLK4	protein_coding	4.1364	-0.89001	-1.91724	0.00024646	5e-07	1.23e-06
VWCE	protein_coding	2.2989	2.76727	2.51837	2.8e-07	5.1e-07	3.2e-07
HIST1H2AI	protein_coding	1.944	-1.74703	-2.88683	2.55e-05	5.1e-07	1.17e-06
HIST1H2BC	protein_coding	4.016	-1.43844	-2.31321	3.36e-05	5.1e-07	1.17e-06
MKI67	protein_coding	8.4361	-1.30293	-1.99667	4.15e-05	5.1e-07	1.29e-06
TTK	protein_coding	3.9021	-0.78217	-1.96708	0.00081194	5.1e-07	1.38e-06
CDKN1A	protein_coding	8.5916	1.87259	1.45022	1.1e-07	5.3e-07	2.7e-07
HIST1H2AL	protein_coding	3.7057	-1.64065	-3.13426	8.76e-05	5.3e-07	1.59e-06
SKA3	protein_coding	4.6639	-1.10982	-2.17714	0.00016121	5.3e-07	1.59e-06
KIF15	protein_coding	4.9241	-1.19374	-2.3386	0.0001703	5.6e-07	1.66e-06
CYFIP2	protein_coding	5.0597	1.73701	1.45725	1.9e-07	5.9e-07	3.2e-07
HIST1H2BF	protein_coding	3.9222	-1.85485	-3.05786	4.41e-05	6.1e-07	1.59e-06
USP1	protein_coding	4.147	-1.09815	-1.74443	5e-05	6.3e-07	1.69e-06
HIST1H2AG	protein_coding	3.3654	-1.66497	-2.7794	5.01e-05	6.6e-07	1.81e-06
CCNA2	protein_coding	5.5853	-1.02507	-1.82235	0.00012579	6.6e-07	2.03e-06
MDM2	protein_coding	8.6827	2.41435	1.75938	1.1e-07	7e-07	2.7e-07
HIST1H3J	protein_coding	3.1986	-2.1314	-3.09094	1.93e-05	7.3e-07	1.59e-06
HIST1H2AJ	protein_coding	1.1064	-1.69489	-3.19621	6.09e-05	7.3e-07	2.21e-06
NEAT1	lincRNA	10.8135	1.11784	1.75021	8.18e-05	7.3e-07	2.26e-06
CENPF	protein_coding	8.1837	-0.8825	-2.05345	0.00126856	7.3e-07	2.44e-06
UHRF1	protein_coding	3.7637	-1.2774	-1.6074	1.27e-05	7.4e-07	1.59e-06
FBXO5	protein_coding	4.0016	-1.06089	-2.15749	0.0003232	7.7e-07	2.69e-06
SGOL2	protein_coding	4.0508	-1.02046	-2.06248	0.00033078	8.5e-07	2.79e-06
MCM6	protein_coding	5.5952	-1.70398	-1.84141	4.93e-06	9.5e-07	1.29e-06
CLSPN	protein_coding	5.1323	-1.22434	-2.00039	9.95e-05	9.6e-07	2.79e-06
SPATA18	protein_coding	3.671	1.31851	1.75872	3.72e-05	1e-06	2.44e-06
LMNB1	protein_coding	4.9438	-1.0484	-1.59729	7.03e-05	1e-06	2.79e-06
E2F8	protein_coding	4.3461	-1.15364	-1.84222	8.65e-05	1.01e-06	2.9e-06
ANLN	protein_coding	7.6169	-1.22447	-1.89638	9.95e-05	1.02e-06	2.92e-06
HIST1H1A	protein_coding	3.1403	-1.95391	-2.95362	4e-05	1.08e-06	2.79e-06
CEP55	protein_coding	5.5722	-0.93912	-1.65214	0.00022173	1.08e-06	3.57e-06
HIST1H1B	protein_coding	3.1142	-1.78573	-3.19955	0.00011157	1.19e-06	3.57e-06
HIST1H1C	protein_coding	3.6826	-0.79451	-2.2057	0.00328867	1.23e-06	3.99e-06
ESCO2	protein_coding	4.1522	-1.30035	-2.11191	0.00011061	1.26e-06	3.79e-06
HMGB2	protein_coding	6.3586	-1.12996	-2.23954	0.00063237	1.44e-06	4.72e-06
SMC2	protein_coding	7.0468	-0.79517	-1.63348	0.0009563	1.44e-06	4.72e-06
CDC6	protein_coding	5.0398	-1.57633	-1.94806	2.55e-05	1.62e-06	2.9e-06
MCM10	protein_coding	4.1268	-1.10778	-1.90413	0.00020598	1.62e-06	4.87e-06
RFC3	protein_coding	4.1302	-0.65136	-1.71238	0.00345551	1.62e-06	4.87e-06
WDR76	protein_coding	4.3806	-1.52296	-1.80308	1.78e-05	1.67e-06	2.79e-06
FOXM1	protein_coding	4.3606	-0.88712	-1.40418	0.00012902	1.7e-06	4.87e-06
ERCC6L	protein_coding	3.9895	-1.09072	-1.76983	0.00014369	1.71e-06	4.97e-06
BRCA2	protein_coding	4.6961	-0.69684	-1.81449	0.00360854	1.71e-06	5.19e-06
MCM8	protein_coding	4.8625	-0.69316	-1.59352	0.00182223	1.71e-06	5.36e-06
MIS18BP1	protein_coding	5.0726	-0.65065	-1.42982	0.0014355	1.71e-06	5.36e-06
HIST1H3I	protein_coding	3.2182	-1.5157	-2.27571	7.94e-05	1.78e-06	4.72e-06
HIST2H2BF	protein_coding	0.265	-1.83808	-2.99438	7.33e-05	1.79e-06	4.72e-06
RRM2	protein_coding	7.695	-1.40027	-2.1446	0.00014341	1.8e-06	5.19e-06
RACGAP1	protein_coding	4.7967	-1.03527	-1.91773	0.00041466	1.8e-06	5.79e-06
CKAP2L	protein_coding	4.2942	-0.94206	-2.0918	0.00138226	1.82e-06	5.83e-06
CYTL1	protein_coding	3.5675	0.65714	1.91	0.0127309	1.83e-06	5.22e-06
ATAD2	protein_coding	6.1488	-1.03205	-1.71268	0.00025838	1.89e-06	5.82e-06
NDC1	protein_coding	5.4868	-0.6538	-1.35306	0.00117374	1.89e-06	6.15e-06
BTG2	protein_coding	5.3885	1.80178	1.50155	1.26e-06	1.92e-06	1.02e-06
ARHGAP11A	protein_coding	6.3602	-0.77978	-1.66012	0.00154	1.96e-06	6.44e-06
NDC80	protein_coding	4.3913	-0.98839	-2.12508	0.00119103	1.98e-06	6.55e-06
RRM2P3	processed_pseudogene	2.7651	-1.32434	-2.14311	0.00014102	2.03e-06	5.82e-06
HIST1H2BM	protein_coding	-0.5742	-2.28678	-3.1511	3.19e-05	2.06e-06	4.23e-06
KIF18A	protein_coding	4.9303	-0.83712	-1.93265	0.00211797	2.06e-06	6.84e-06
TOP2A	protein_coding	7.9023	-0.85965	-1.6644	0.00098154	2.09e-06	7.05e-06
CDK1	protein_coding	4.4185	-0.81431	-1.78497	0.00158468	2.12e-06	7.05e-06
BRCA1	protein_coding	4.6334	-0.45946	-1.64813	0.0259719	2.15e-06	5.83e-06
HIST1H4B	protein_coding	0.2253	-2.12623	-3.14756	4.8e-05	2.19e-06	4.97e-06
ASF1B	protein_coding	2.7319	-1.30539	-1.8917	8.65e-05	2.19e-06	5.79e-06
DEPDC1B	protein_coding	3.5547	-1.40916	-2.12282	0.00011157	2.19e-06	5.95e-06
SKA1	protein_coding	4.7418	-0.72389	-1.95929	0.00595442	2.19e-06	7.05e-06
MCM5	protein_coding	4.2394	-1.04512	-1.54164	0.00011212	2.22e-06	6.15e-06
SYNE2	protein_coding	6.873	-0.80559	-1.21851	0.00018057	2.39e-06	7.05e-06
POLA1	protein_coding	5.0466	-0.9355	-1.34479	0.00011477	2.65e-06	6.94e-06
DTL	protein_coding	5.2025	-0.87768	-2.02333	0.00268733	2.67e-06	9.19e-06
CDKN2C	protein_coding	1.6344	-1.58089	-2.01938	4e-05	2.8e-06	5.22e-06
DNA2	protein_coding	3.6039	-0.94873	-1.59982	0.00033078	2.8e-06	9.1e-06
NUF2	protein_coding	4.3048	-1.06236	-2.00615	0.00072828	2.8e-06	9.6e-06
NCAPH	protein_coding	4.5543	-0.89913	-1.70621	0.00081194	2.8e-06	9.6e-06
POLQ	protein_coding	4.8661	-0.7729	-1.6332	0.00166924	2.8e-06	9.65e-06
NCAPG	protein_coding	6.0945	-1.05551	-2.06417	0.00119103	3.06e-06	1.03e-05
RRM2P2	processed_pseudogene	1.1862	-1.521	-2.31512	0.00010605	3.13e-06	7.67e-06
HIST1H2BH	protein_coding	1.8093	-1.74074	-2.75208	0.00010686	3.27e-06	8.02e-06
KIF23	protein_coding	6.4063	-1.0405	-1.79636	0.00057862	3.34e-06	1.07e-05
FAM111B	protein_coding	2.6204	-1.87198	-3.10153	0.0001703	3.36e-06	9.36e-06
GAS2L3	protein_coding	5.3393	-0.84175	-1.30123	0.00026061	3.51e-06	1.01e-05
PLK2	protein_coding	6.9319	1.00694	1.03429	1.77e-05	3.66e-06	4.52e-06
DEPDC1	protein_coding	3.6421	-1.15129	-1.62301	0.00011902	3.71e-06	9.29e-06
RP11-424C20.2	processed_pseudogene	2.5076	-1.05918	-1.56688	0.00014555	3.72e-06	9.65e-06
CDC7	protein_coding	3.6038	-0.91637	-1.51796	0.00037389	3.72e-06	1.11e-05
NCAPD3	protein_coding	5.3993	-0.80247	-1.27246	0.00032788	3.72e-06	1.11e-05
STIL	protein_coding	4.9256	-0.6963	-1.42818	0.00179745	3.72e-06	1.25e-05
RBBP8	protein_coding	3.6224	-0.79197	-1.50566	0.00098173	3.73e-06	1.24e-05
CEP152	protein_coding	4.6871	-0.46172	-1.39765	0.0167642	3.75e-06	1.12e-05
MYBL2	protein_coding	4.5304	-0.91055	-1.57897	0.00056844	3.79e-06	1.22e-05
MND1	protein_coding	2.659	-0.84088	-1.97741	0.00318262	3.83e-06	1.31e-05
CPM	protein_coding	2.0766	3.69598	3.26285	4.78e-06	3.87e-06	2.44e-06
NUSAP1	protein_coding	5.6729	-0.96389	-1.75031	0.00089191	3.88e-06	1.31e-05
KIF14	protein_coding	4.2901	-0.84571	-1.74409	0.00182223	4.21e-06	1.43e-05
HIST1H4H	protein_coding	2.1246	-1.73185	-2.43924	9.95e-05	4.63e-06	1.01e-05
CDCA2	protein_coding	4.8221	-0.93671	-1.80786	0.00130696	4.64e-06	1.56e-05
HJURP	protein_coding	5.335	-0.88287	-1.74536	0.00166185	4.64e-06	1.56e-05
SPIN4	protein_coding	3.4256	-0.94182	-1.4619	0.00030127	4.76e-06	1.33e-05
DUT	protein_coding	4.3078	-1.46356	-1.47742	1.78e-05	4.83e-06	4.97e-06
RRM1	protein_coding	6.1814	-0.9617	-1.42582	0.00027471	4.83e-06	1.33e-05
MYH16	unitary_pseudogene	1.1654	4.46995	2.76304	1.4e-07	5.01e-06	3.2e-07
ECT2	protein_coding	6.176	-0.8268	-1.46596	0.00098154	5.01e-06	1.66e-05
STEAP1	protein_coding	4.2397	-1.08546	-1.27402	5e-05	5.13e-06	8.59e-06
BUB1B	protein_coding	5.5438	-1.05116	-1.59936	0.0003232	5.21e-06	1.51e-05
DBF4	protein_coding	3.2113	-0.93007	-1.48612	0.00039329	5.21e-06	1.56e-05
ATAD5	protein_coding	4.3008	-0.65894	-1.33799	0.00207898	5.21e-06	1.81e-05
E2F1	protein_coding	1.1509	-1.45789	-2.02269	9.95e-05	5.27e-06	1.11e-05
HMOX1	protein_coding	4.4018	2.57241	1.54201	1.3e-07	5.28e-06	3.2e-07
SULF2	protein_coding	5.4107	0.98853	1.30602	0.00014341	5.52e-06	1.31e-05
RFC4	protein_coding	3.7264	-0.82889	-1.59751	0.0014638	5.52e-06	1.91e-05
ZNF367	protein_coding	1.8096	-1.56132	-2.01423	7.94e-05	5.56e-06	1.07e-05
MLF1IP	NA	3.2119	-0.65979	-1.81186	0.0110848	5.56e-06	1.83e-05
RAD51AP1	protein_coding	4.5109	-1.06197	-2.17518	0.00204339	5.56e-06	1.94e-05
KIF20A	protein_coding	5.9299	-1.4531	-1.85706	0.00010605	5.64e-06	1.22e-05
KIAA1524	protein_coding	5.0747	-0.92268	-1.63377	0.00097205	5.64e-06	1.91e-05
RTKN2	protein_coding	2.3605	-1.00061	-1.81028	0.00087631	5.73e-06	1.92e-05
MAD2L1	protein_coding	3.4318	-0.79743	-1.684	0.00270209	5.97e-06	2.14e-05
CMBL	protein_coding	4.6617	1.24715	1.12689	8.96e-06	5.99e-06	4.16e-06
PTTG1	protein_coding	5.7722	-0.88347	-1.29511	0.00032136	6.42e-06	1.81e-05
SMC3	protein_coding	6.8425	-0.48924	-1.08358	0.00540301	6.49e-06	2.29e-05
CDCA7	protein_coding	4.2678	-1.25667	-1.31805	3.36e-05	7.42e-06	8.35e-06
RP11-152C15.1	processed_pseudogene	4.3586	-1.06045	-1.40203	0.00014341	7.42e-06	1.63e-05
MSH2	protein_coding	5.254	-0.77173	-1.10074	0.00028245	7.42e-06	1.94e-05
PBK	protein_coding	3.817	-1.09555	-1.92337	0.00096717	7.42e-06	2.41e-05
E2F2	protein_coding	1.1024	-1.77001	-2.14399	6.38e-05	7.7e-06	1.17e-05
TP53INP1	protein_coding	5.5565	1.09466	1.19963	5e-05	7.73e-06	1.07e-05
TPX2	protein_coding	7.1142	-0.94087	-1.53739	0.0008795	7.73e-06	2.48e-05
BARD1	protein_coding	3.915	-0.90423	-1.5848	0.00103308	7.73e-06	2.51e-05
CENPN	protein_coding	4.3427	-0.81598	-1.33932	0.00074659	7.9e-06	2.48e-05
ERV3-1	protein_coding	4.55	0.31964	1.0611	0.0493162	7.99e-06	2.23e-05
EZH2	protein_coding	4.6776	-0.75857	-1.12854	0.00039022	7.99e-06	2.3e-05
GTSE1	protein_coding	4.3145	-0.88786	-1.53779	0.00099623	7.99e-06	2.58e-05
GDF15	protein_coding	6.2106	2.4838	1.27078	1.1e-07	8.09e-06	2.7e-07
PAICSP4	processed_pseudogene	4.4244	-1.12246	-1.19069	4e-05	8.1e-06	9.65e-06
CCNF	protein_coding	4.2724	-0.76505	-1.36994	0.00130696	8.1e-06	2.73e-05
FEN1	protein_coding	5.1402	-1.39805	-1.76099	0.00011867	8.21e-06	1.68e-05
MCM2	protein_coding	3.9129	-1.17221	-1.82013	0.00044285	8.25e-06	2.46e-05
GAL3ST4	protein_coding	2.2557	1.75514	1.71444	2.55e-05	8.26e-06	7.23e-06
MEG3	lincRNA	6.9549	0.46463	1.2909	0.0224793	8.26e-06	2.6e-05
FIGNL1	protein_coding	5.109	-0.89051	-1.22837	0.00025052	8.4e-06	2.18e-05
FAM212B	protein_coding	4.1978	1.45526	1.30894	1.27e-05	8.57e-06	5.22e-06
GINS2	protein_coding	3.3696	-1.76466	-2.05469	7.09e-05	8.68e-06	1.33e-05
ORC1	protein_coding	2.5137	-0.92187	-1.72336	0.00148605	8.68e-06	3.01e-05
DNMT1	protein_coding	6.2996	-0.65491	-0.91253	0.0003232	9.11e-06	2.48e-05
HELLS	protein_coding	5.3295	-1.07972	-1.31895	0.00011157	9.15e-06	1.8e-05
ZMAT3	protein_coding	7.0931	0.81412	1.07645	0.00024374	9.26e-06	2.32e-05
BRIP1	protein_coding	4.2429	-0.80332	-1.76225	0.0048422	9.26e-06	3.28e-05
PRC1	protein_coding	5.9936	-1.19551	-1.60267	0.00024462	9.5e-06	2.38e-05
C18orf54	protein_coding	4.4825	-0.66455	-1.21604	0.00182101	9.5e-06	3.28e-05
TICRR	protein_coding	4.2251	-0.64767	-1.28053	0.00291175	9.75e-06	3.42e-05
WDHD1	protein_coding	5.9276	-0.64702	-1.35998	0.00486434	9.94e-06	3.46e-05
HIST1H4L	protein_coding	-0.7544	-2.107	-3.00719	0.00014555	9.95e-06	2.14e-05
RP11-121L10.3	NA	7.3058	-0.99104	-1.10944	7.67e-05	9.99e-06	1.56e-05
HES2	protein_coding	2.7748	1.17961	1.37426	9.95e-05	1.02e-05	1.81e-05
TNFRSF10C	protein_coding	3.62	1.37396	1.35228	3.19e-05	1.05e-05	9.65e-06
HIST2H2AA3	protein_coding	1.3761	-1.30806	-2.20119	0.00057862	1.05e-05	3.13e-05
UBE2T	protein_coding	4.6626	-1.18528	-1.64963	0.00030296	1.07e-05	2.73e-05
HSPE1	protein_coding	4.3115	-0.66302	-1.18382	0.00166625	1.07e-05	3.61e-05
FANCM	protein_coding	4.5742	-0.66559	-1.16819	0.00154113	1.07e-05	3.62e-05
RTTN	protein_coding	4.7586	-0.49618	-1.1714	0.00941327	1.07e-05	3.68e-05
PLA2G4C	protein_coding	2.4093	0.97883	1.56405	0.00112521	1.08e-05	3.52e-05
FAM83D	protein_coding	3.9833	-0.88463	-1.59275	0.00162517	1.1e-05	3.7e-05
BUB1	protein_coding	5.866	-1.16691	-1.69703	0.0004603	1.11e-05	3.17e-05
MMS22L	protein_coding	5.034	-0.72737	-1.27746	0.00162517	1.12e-05	3.78e-05
MNS1	protein_coding	1.5084	-0.34679	-1.96586	0.175362	1.13e-05	2.54e-05
MELK	protein_coding	5.8686	-0.87284	-1.61399	0.00236797	1.13e-05	3.92e-05
RP4-717I23.3	processed_transcript	1.5998	0.841	1.67118	0.00518076	1.21e-05	4.12e-05
KNTC1	protein_coding	5.4748	-0.69741	-1.26139	0.00214469	1.22e-05	4.11e-05
SGOL1	protein_coding	3.9379	-0.70897	-1.68547	0.00935962	1.22e-05	4.11e-05
ESPL1	protein_coding	4.0515	-0.43413	-1.38168	0.0384801	1.24e-05	3.7e-05
C11orf82	NA	3.5502	-0.63581	-1.51162	0.00949113	1.25e-05	4.23e-05
BLM	protein_coding	4.3757	-0.72821	-1.59021	0.00605484	1.25e-05	4.24e-05
PRIM1	protein_coding	2.7882	-0.7852	-1.72726	0.00560278	1.29e-05	4.43e-05
PTCHD4	protein_coding	3.1324	0.4221	1.32984	0.0525071	1.3e-05	3.71e-05
CACYBP	protein_coding	5.1379	-0.74844	-1.08983	0.00054543	1.31e-05	3.68e-05
ANP32E	protein_coding	6.0999	-0.8243	-1.26404	0.00085213	1.33e-05	4.02e-05
ARHGAP11B	protein_coding	4.7593	-0.57445	-1.3695	0.0110519	1.33e-05	4.46e-05
RAD18	protein_coding	5.043	-0.51455	-1.12044	0.00712562	1.33e-05	4.49e-05
ZNF117	protein_coding	4.0636	0.32953	1.21453	0.0920224	1.35e-05	3.52e-05
CENPJ	protein_coding	5.1303	-0.49247	-1.18674	0.0124996	1.35e-05	4.46e-05
MCM4	protein_coding	5.4206	-1.26287	-1.61292	0.00023216	1.39e-05	3.09e-05
DHFRP1	processed_pseudogene	3.2294	-1.22695	-1.7107	0.00033769	1.39e-05	3.46e-05
POLD3	protein_coding	4.6869	-0.72771	-1.28348	0.00193754	1.41e-05	4.56e-05
HIST1H2BG	protein_coding	0.6041	-2.09321	-2.86807	0.00011902	1.43e-05	2.51e-05
CHAF1B	protein_coding	3.5464	-0.86057	-1.44554	0.00130378	1.43e-05	4.46e-05
VRK1	protein_coding	4.6925	-0.86421	-1.41262	0.0012018	1.43e-05	4.46e-05
PHF19	protein_coding	4.7071	-0.82016	-1.19469	0.00057862	1.47e-05	4.08e-05
FANCI	protein_coding	5.864	-0.87094	-1.36706	0.00102886	1.47e-05	4.46e-05
TUBA1B	protein_coding	7.8525	-0.82018	-1.00407	0.00020445	1.48e-05	3.11e-05
PLXNB2	protein_coding	4.4718	1.21374	1.18477	4e-05	1.49e-05	1.32e-05
CDCA3	protein_coding	3.6995	-1.21227	-1.76147	0.00049021	1.52e-05	4.07e-05
JAG1	protein_coding	5.1271	0.77263	0.92182	0.00016214	1.53e-05	3.02e-05
HMGN2P5	processed_pseudogene	3.0118	-1.09691	-1.40789	0.00023216	1.53e-05	3.3e-05
HIST1H2AK	protein_coding	0.8048	-0.84201	-1.7842	0.00361524	1.53e-05	5.32e-05
TRIM59	protein_coding	4.5501	-0.81832	-1.1094	0.00036692	1.54e-05	3.86e-05
IQGAP3	protein_coding	4.3553	-0.32747	-1.20073	0.0757951	1.54e-05	4.21e-05
GOLGA8B	protein_coding	4.7118	0.61141	0.95234	0.00121047	1.56e-05	4.87e-05
ZWINT	protein_coding	4.4631	-1.13359	-1.90452	0.00138226	1.57e-05	5.02e-05
SKP2	protein_coding	5.4537	-0.78581	-1.07249	0.0004086	1.58e-05	4.07e-05
EXO1	protein_coding	4.0646	-0.75008	-1.85623	0.0130726	1.6e-05	5.51e-05
HIST1H3F	protein_coding	-0.9604	-1.88248	-3.30577	0.00065868	1.63e-05	4.46e-05
IGFBP3	protein_coding	2.4366	-1.40603	-1.26225	2.47e-05	1.64e-05	9.65e-06
HIST2H2AA4	protein_coding	1.3291	-1.44899	-2.2858	0.0006163	1.65e-05	4.46e-05
GSG2	protein_coding	2.4749	-0.67478	-1.59082	0.0100501	1.67e-05	5.8e-05
CDC25A	protein_coding	3.6023	-0.97327	-1.27962	0.00030127	1.68e-05	3.86e-05
RP11-1033A18.1	NA	6.4241	-0.58098	-0.91298	0.00129068	1.68e-05	5.32e-05
DGKA	protein_coding	4.9984	0.84927	0.97007	0.00013007	1.71e-05	3e-05
NDRG4	protein_coding	4.6809	0.93044	1.0048	9.27e-05	1.74e-05	2.48e-05
HIST2H2AB	protein_coding	0.983	-1.11645	-2.19846	0.00218313	1.74e-05	5.8e-05
MEOX2	protein_coding	2.9042	-1.40764	-1.28952	3e-05	1.75e-05	1.13e-05
XRCC2	protein_coding	2.9927	-0.87105	-1.4449	0.00143784	1.77e-05	5.62e-05
FAS	protein_coding	2.2615	2.35954	1.60633	2.32e-06	1.8e-05	2.03e-06
SASS6	protein_coding	3.2627	-0.42758	-1.35452	0.0456693	1.8e-05	5.51e-05
CENPA	protein_coding	3.1328	-1.14663	-1.93771	0.00149587	1.8e-05	5.75e-05
CDKN3	protein_coding	3.3738	-1.48909	-1.7676	0.00014369	1.82e-05	3.26e-05
CENPQ	protein_coding	1.6388	-0.53526	-1.76967	0.0429883	1.82e-05	5.62e-05
NEK10	protein_coding	2.1863	0.69224	1.65515	0.0195595	1.84e-05	6.22e-05
KIF24	protein_coding	3.1099	-0.47129	-1.49431	0.0447621	1.85e-05	5.66e-05
CDC45	protein_coding	4.2161	-1.05701	-1.80692	0.00182271	1.99e-05	6.43e-05
SESN2	protein_coding	3.6235	1.76568	1.26011	4.02e-06	2.03e-05	2.92e-06
GEN1	protein_coding	4.3247	-0.50271	-1.1378	0.011186	2.03e-05	7.19e-05
THSD4	protein_coding	5.3303	0.09713	0.9034	0.536451	2.08e-05	3.33e-05
HMGN2	protein_coding	5.0304	-0.93474	-1.25121	0.00042896	2.09e-05	5e-05
AURKA	protein_coding	5.371	-0.94475	-1.52385	0.00154113	2.09e-05	6.61e-05
NEIL3	protein_coding	3.4293	-0.88658	-1.75096	0.00446173	2.09e-05	7.36e-05
CENPK	protein_coding	3.2638	-0.80996	-1.61022	0.00501182	2.14e-05	7.49e-05
GINS1	protein_coding	4.3535	-1.09178	-1.52972	0.00057862	2.19e-05	5.59e-05
EXOSC8	protein_coding	4.3951	-0.72879	-1.08873	0.00097104	2.19e-05	6.22e-05
DCLRE1B	protein_coding	3.8187	-0.68307	-1.20726	0.0026994	2.21e-05	7.44e-05
MCM3	protein_coding	5.7945	-0.97886	-1.21867	0.00029969	2.23e-05	4.5e-05
DBF4P1	processed_pseudogene	1.4894	-1.02589	-1.80489	0.00184556	2.26e-05	7.36e-05
FAM64A	protein_coding	2.3037	-1.04413	-1.90067	0.00236908	2.26e-05	7.49e-05
FAM111A	protein_coding	5.3152	-0.66364	-1.13101	0.00241167	2.26e-05	7.5e-05
CLIP3	protein_coding	3.7223	0.80713	1.43758	0.00397192	2.29e-05	7.93e-05
CCNE2	protein_coding	2.0704	-1.57126	-2.01897	0.00026302	2.3e-05	4.46e-05
TMPO	protein_coding	5.1353	-0.90588	-1.3477	0.00098234	2.3e-05	6.67e-05
NEIL1	protein_coding	1.4943	0.62266	1.57197	0.0286232	2.3e-05	7.5e-05
PTGS2	protein_coding	6.0461	1.22708	0.88997	4.96e-06	2.32e-05	4.51e-06
KIF4A	protein_coding	5.4932	-1.01784	-1.50255	0.00097686	2.32e-05	6.67e-05
NUP107	protein_coding	5.7566	-0.44817	-1.07517	0.0183916	2.44e-05	8.29e-05
KIFC1	processed_transcript	2.9893	-0.89308	-1.60687	0.00283478	2.46e-05	8.23e-05
CENPI	protein_coding	4.4328	-1.0115	-1.31082	0.00039312	2.53e-05	5.54e-05
RBL1	protein_coding	5.2218	-0.65942	-1.20555	0.00394953	2.54e-05	8.63e-05
MZF1	protein_coding	2.5801	1.1117	1.37159	0.00033137	2.57e-05	5.32e-05
GMNN	protein_coding	3.4612	-1.09438	-1.63714	0.00098154	2.65e-05	7.42e-05
MTBP	protein_coding	3.3399	-0.55028	-1.21361	0.0110135	2.65e-05	9.26e-05
HIST1H2BI	protein_coding	-0.7642	-1.70468	-3.20894	0.00119103	2.7e-05	7.78e-05
RP11-611O2.1	antisense	1.3905	1.61457	1.77659	0.00014369	2.72e-05	4.04e-05
HIST2H2AC	protein_coding	1.7177	-1.42743	-2.24923	0.00098154	2.72e-05	7.5e-05
ANKRD45	protein_coding	0.5983	3.06525	3.17289	9.95e-05	2.74e-05	3.28e-05
DLGAP5	protein_coding	6.3946	-1.15308	-1.65832	0.00098154	2.74e-05	7.6e-05
HAUS8	protein_coding	3.4255	-0.7516	-1.57825	0.00782969	2.74e-05	9.7e-05
MSH6	protein_coding	6.1314	-0.88384	-0.85036	6.06e-05	2.79e-05	2.46e-05
G2E3	protein_coding	4.6071	-0.50628	-0.99447	0.00650927	2.82e-05	9.92e-05
UBE2C	protein_coding	4.5678	-0.53367	-1.18551	0.0125057	2.84e-05	9.94e-05
LAPTM5	protein_coding	6.371	0.62953	0.84844	0.00072946	2.85e-05	7.36e-05
CSE1L	protein_coding	8.0863	-0.48965	-0.98089	0.00877209	2.85e-05	0.0001003
ZNF561	protein_coding	4.7373	0.89483	0.98418	0.00014939	2.89e-05	4.21e-05
PARPBP	protein_coding	2.8655	-0.51836	-1.38515	0.027424	2.89e-05	9.7e-05
TK1	protein_coding	4.1897	-0.85502	-1.47755	0.00278368	2.9e-05	9.7e-05
TOPBP1	protein_coding	6.2955	-0.45051	-0.90716	0.00877209	2.91e-05	0.00010158
NOP58	protein_coding	6.1696	-0.46788	-0.96519	0.0101548	2.98e-05	0.00010351
KIAA1731	NA	5.0791	-0.24843	-0.95243	0.118903	3.03e-05	7.93e-05
HMGB1P5	transcribed_processed_pseudogene	5.6706	-0.73984	-1.04282	0.00093542	3.03e-05	8.17e-05
IFNE	protein_coding	2.3337	0.81655	1.35041	0.00312375	3.08e-05	0.00010128
ADCY4	protein_coding	3.3504	1.09716	1.69131	0.0019959	3.14e-05	9.92e-05
PHLDA3	protein_coding	2.8041	1.48991	1.34499	4.03e-05	3.16e-05	1.91e-05
CCDC34	protein_coding	2.8475	-0.33425	-1.31271	0.115266	3.24e-05	8.5e-05
KIF18B	protein_coding	4.1851	-0.68717	-1.51363	0.0119013	3.24e-05	0.0001107
ZWILCH	protein_coding	5.345	-0.74714	-1.17959	0.00193845	3.25e-05	0.00010054
ORC6	protein_coding	4.3011	-0.87588	-1.55975	0.00362008	3.27e-05	0.00010917
PCNA	protein_coding	5.6359	-0.50743	-1.04602	0.0101816	3.27e-05	0.00011291
APOBEC3C	protein_coding	3.3693	0.75043	1.08634	0.00130696	3.28e-05	9.54e-05
TRIP13	protein_coding	5.0317	-0.82157	-1.31698	0.00207898	3.32e-05	0.0001034
HERC2P2	transcribed_unprocessed_pseudogene	5.3993	0.34701	0.85305	0.0280151	3.32e-05	0.00010995
POLE3	protein_coding	5.2853	-0.61233	-0.84423	0.00086978	3.37e-05	8.63e-05
MAPK8IP3	protein_coding	3.0476	0.7575	1.29136	0.00397959	3.38e-05	0.00011291
MTHFD1	protein_coding	4.8641	-0.76918	-0.95536	0.00039437	3.4e-05	7.03e-05
TEX15	protein_coding	1.3023	-0.65629	-2.13333	0.0440969	3.5e-05	0.0001099
SHCBP1	protein_coding	5.4631	-1.1291	-1.6606	0.00126856	3.52e-05	9.94e-05
MASTL	protein_coding	4.6569	-0.75093	-1.27797	0.00325886	3.69e-05	0.00011813
CMC2	protein_coding	5.1889	-0.66125	-0.88493	0.00075995	3.72e-05	8.91e-05
HIST1H2BK	protein_coding	3.8629	-0.71592	-1.11529	0.00182101	3.74e-05	0.0001101
AC007362.1	NA	6.2009	0.50532	1.00087	0.0101674	3.74e-05	0.00013052
NCAPG2	protein_coding	4.8922	-0.77301	-1.31307	0.00328692	3.81e-05	0.00012287
TIPIN	protein_coding	2.9899	-0.79817	-1.14916	0.00108542	3.82e-05	0.00010108
TCF19	protein_coding	2.0768	-1.10624	-1.84295	0.00195715	3.82e-05	0.00011361
C4orf21	NA	3.765	-0.2641	-1.20178	0.187922	3.89e-05	9.19e-05
DHFR	protein_coding	4.5833	-1.39827	-1.56789	0.00021301	3.9e-05	5.62e-05
H2AFX	protein_coding	3.8888	-1.02071	-1.50579	0.00126856	3.98e-05	0.00010809
AURKB	protein_coding	3.7912	-1.02715	-1.84946	0.00406022	4.14e-05	0.00013659
CDCA4	protein_coding	3.2528	-0.83359	-1.2091	0.00122168	4.15e-05	0.00010981
KPNA2	protein_coding	7.6547	-0.65484	-1.03019	0.00262406	4.27e-05	0.00013202
FST	protein_coding	2.2181	-0.53952	-1.60387	0.0453007	4.28e-05	0.00013442
MCM7	protein_coding	5.3212	-0.9296	-1.30744	0.00114934	4.35e-05	0.00011022
DSN1	protein_coding	4.3852	-0.83679	-1.19973	0.00126689	4.59e-05	0.00011765
KIAA0101	protein_coding	3.7483	-0.84587	-1.4243	0.00325886	4.62e-05	0.0001452
DLEU2	antisense	2.0401	-0.70314	-1.39753	0.00800958	4.68e-05	0.00015771
SPC25	protein_coding	2.8372	-1.27155	-2.26433	0.00368197	4.89e-05	0.00015412
SPDL1	protein_coding	6.6094	-0.55966	-1.16612	0.0140416	4.89e-05	0.00016407
CEP135	protein_coding	4.6418	-0.22283	-1.02721	0.212306	5.03e-05	0.0001101
AMD1	protein_coding	5.4071	-0.78884	-0.87988	0.00026263	5.04e-05	7.34e-05
FH	protein_coding	5.9609	-0.71308	-0.88221	0.00056338	5.04e-05	9.94e-05
H2AFZ	protein_coding	7.7032	-1.11302	-1.40607	0.00069079	5.04e-05	0.00010454
PARP2	protein_coding	5.6951	-0.41438	-0.90815	0.0176537	5.04e-05	0.00016767
CNTRL	protein_coding	5.3087	-0.5422	-0.99553	0.00670726	5.06e-05	0.00016767
MYBL1	protein_coding	2.8583	-0.79997	-1.33543	0.00325886	5.08e-05	0.00015695
H2AFZP3	processed_pseudogene	2.5523	-1.20766	-1.42399	0.00032788	5.15e-05	8.2e-05
PRPS1	protein_coding	4.2257	-0.82006	-0.95042	0.00032755	5.18e-05	8.2e-05
H2BFS	protein_coding	-0.0323	-1.24518	-2.05368	0.00192181	5.18e-05	0.00014603
KDELC2	protein_coding	5.8569	-0.7081	-0.87605	0.00057214	5.2e-05	0.00010128
PARP1	protein_coding	6.1891	-0.76937	-0.87805	0.00032788	5.28e-05	8.32e-05
LRP1	protein_coding	1.0362	1.04799	1.71079	0.00424649	5.28e-05	0.00016771
UNG	protein_coding	3.8011	-1.22883	-1.134	7.2e-05	5.31e-05	3.46e-05
NUP35	protein_coding	2.4963	-0.6719	-1.20261	0.00506638	5.37e-05	0.00017359
PLK1	protein_coding	4.6936	-0.82877	-1.51356	0.00609993	5.41e-05	0.00017626
GPSM2	protein_coding	3.5735	-0.75139	-1.30053	0.0043695	5.52e-05	0.00017449
HIST1H2BD	protein_coding	0.5125	-1.25308	-1.9366	0.00149086	5.8e-05	0.00014968
PLXNA3	protein_coding	3.3557	0.56578	1.2285	0.0214738	5.84e-05	0.00018948
SPAG5	protein_coding	4.1222	-1.10565	-1.58049	0.00138226	5.92e-05	0.00014936
DTYMK	protein_coding	5.0703	-0.64179	-0.979	0.0023925	5.92e-05	0.00016774
NABP1	protein_coding	6.2924	0.50495	0.8415	0.00476967	5.92e-05	0.00018437
SMC1A	protein_coding	7.5076	-0.57475	-0.84165	0.00207898	6.07e-05	0.00016765
HIST1H2AE	protein_coding	0.8268	-1.17065	-2.10577	0.00326814	6.09e-05	0.00018003
SUPT16H	protein_coding	6.9258	-0.47678	-0.76315	0.00368197	6.15e-05	0.00018437
NPM1P27	processed_pseudogene	9.0372	-0.55676	-0.7956	0.00186929	6.29e-05	0.00016767
NRP2	protein_coding	7.7601	0.49946	0.83114	0.00493456	6.29e-05	0.00019428
KIF22	protein_coding	4.2211	-0.72203	-1.50136	0.0129161	6.29e-05	0.00020513
SLC40A1	protein_coding	3.4057	1.42705	1.43587	0.00014341	6.37e-05	6.06e-05
TMPO-AS1	antisense	1.039	-1.28831	-1.76799	0.00092083	6.39e-05	0.00013961
DKC1	protein_coding	6.9152	-0.61315	-0.89329	0.00207898	6.39e-05	0.00017427
ATAT1	protein_coding	3.0612	0.72445	1.2205	0.00563632	6.39e-05	0.00020236
RP11-420A23.1	lincRNA	0.9547	0.96785	1.79886	0.0108609	6.39e-05	0.00020948
EXOSC9	protein_coding	4.732	-0.48899	-0.95083	0.0105993	6.44e-05	0.00021138
PCNXL2	protein_coding	3.4626	0.90585	1.03521	0.00039312	6.47e-05	0.00010128
SNRPD1	protein_coding	5.471	-0.74797	-0.86376	0.00040565	6.57e-05	0.00010351
CCNB1	protein_coding	6.429	-1.17292	-1.595	0.00130696	6.63e-05	0.00016132
ZNF528	protein_coding	3.5048	0.69174	1.02059	0.00243772	6.63e-05	0.00018437
CCNL2	protein_coding	5.7044	0.44151	0.82727	0.0104255	6.63e-05	0.00021756
CEP128	protein_coding	5.1422	-0.60166	-1.29078	0.0173892	6.65e-05	0.00021817
ATP6V0A1	protein_coding	5.1414	0.78832	0.77324	0.00013007	6.78e-05	5.84e-05
ANKRD32	protein_coding	3.147	-0.47376	-1.09329	0.0236011	6.78e-05	0.00021992
MAP1A	protein_coding	3.6414	0.43583	0.9429	0.02232	6.78e-05	0.00021992
MTFR2	protein_coding	3.5011	-0.63932	-1.64811	0.0353342	6.85e-05	0.00021772
IFI27	protein_coding	5.5996	0.35779	1.10521	0.090761	6.87e-05	0.00019074
HMGB1	protein_coding	6.9836	-0.82742	-1.14358	0.00157637	6.89e-05	0.00017448
TUBA1C	protein_coding	7.5869	-0.60889	-0.84248	0.00162589	6.97e-05	0.00017626
TRIM22	protein_coding	6.5086	0.67416	0.72379	0.00027969	6.98e-05	9.07e-05
RNF219	protein_coding	3.664	-0.62166	-1.00383	0.00357053	7.05e-05	0.00020936
ADAM32	protein_coding	1.8528	1.05906	1.35111	0.00098173	7.12e-05	0.00015617
PTMAP2	processed_pseudogene	5.7764	-0.60998	-0.83992	0.00154	7.16e-05	0.00017632
GPC1	protein_coding	3.4017	1.84154	1.25212	8.09e-06	7.2e-05	6.4e-06
SESN1	protein_coding	5.232	0.73122	0.84311	0.00046784	7.2e-05	0.00011744
CENPL	protein_coding	3.2474	-0.75979	-1.29888	0.00493876	7.2e-05	0.00022009
RP11-75L1.2	processed_pseudogene	4.6743	-0.74601	-1.02451	0.001444	7.22e-05	0.00017626
NPM1P46	processed_pseudogene	2.4902	-0.82783	-1.3854	0.00411846	7.25e-05	0.00021852
CACYBPP2	processed_pseudogene	4.6281	-0.74675	-1.11041	0.0023085	7.43e-05	0.00020236
LIN9	protein_coding	2.8656	-0.65856	-1.26343	0.00966327	7.47e-05	0.00023953
CHEK1	protein_coding	5.0254	-0.79317	-0.94867	0.00057862	7.49e-05	0.00013358
PLS1	protein_coding	0.5055	-1.04988	-1.79759	0.00338418	7.5e-05	0.00021817
TFRC	protein_coding	7.5337	-0.50672	-0.805	0.00415709	7.52e-05	0.00022307
HAUS6	protein_coding	4.7045	-0.34622	-0.98812	0.062744	7.64e-05	0.00022449
HSP90AA1	protein_coding	9.8232	-0.59112	-0.88269	0.00299772	7.9e-05	0.00021992
GGH	protein_coding	5.7267	-0.65677	-1.01135	0.00326814	7.9e-05	0.00022253
FER1L4	unitary_pseudogene	0.2052	0.9055	2.17303	0.04422	7.94e-05	0.00024288
PDE4D	protein_coding	5.9224	0.67476	0.81199	0.00073776	8.11e-05	0.00015307
GABRE	protein_coding	3.4441	0.53462	1.0274	0.0138165	8.11e-05	0.00026402
SAPCD2	protein_coding	1.7472	-1.03359	-1.64418	0.00270028	8.12e-05	0.00022009
IL32	protein_coding	3.2326	0.27248	1.04527	0.182695	8.17e-05	0.00019551
HSPD1P1	processed_pseudogene	5.9891	-0.57093	-0.89561	0.00392747	8.26e-05	0.0002384
RP11-54D18.4	processed_pseudogene	3.5197	-0.65234	-1.0597	0.00411846	8.38e-05	0.00024279
LDHA	protein_coding	9.127	-0.81906	-0.76947	0.00011902	8.44e-05	6.17e-05
HIST1H2AC	protein_coding	2.3127	-1.19281	-1.52498	0.00083563	8.44e-05	0.00016407
TSPYL2	protein_coding	3.528	0.64855	0.87721	0.00163162	8.48e-05	0.00020513
TSPAN11	protein_coding	2.042	0.76239	1.15347	0.00347344	8.48e-05	0.00023953
NEK2	protein_coding	4.2907	-0.81771	-1.6431	0.013182	8.48e-05	0.00027413
CHAF1A	protein_coding	3.6429	-0.66876	-1.27063	0.0101519	8.52e-05	0.00027384
TOB1	protein_coding	3.4429	0.69491	1.06178	0.00371042	8.66e-05	0.00024544
RRM2B	protein_coding	5.1786	1.01144	0.82506	4.62e-05	8.74e-05	3e-05
RP11-137N23.1	processed_pseudogene	4.6005	-0.76394	-1.04405	0.0015522	8.74e-05	0.00020759
RGS11	protein_coding	-0.3074	1.38619	1.98845	0.00278368	8.74e-05	0.00023414
MIS18A	protein_coding	3.6632	-0.58903	-1.34168	0.0249967	8.74e-05	0.00028211
BORA	protein_coding	3.0165	-0.54819	-1.10583	0.0141711	8.76e-05	0.00028465
RAD51	protein_coding	3.4062	-1.08782	-1.29335	0.00060407	9.05e-05	0.0001536
XPC	protein_coding	5.5747	1.16002	0.86832	2.78e-05	9.06e-05	1.8e-05
ASXL3	protein_coding	1.1262	1.28575	1.74532	0.0019114	9.06e-05	0.00022104
EDA2R	protein_coding	2.401	1.45434	1.49482	0.00025016	9.11e-05	9.92e-05
FUCA1	protein_coding	2.3145	0.77985	1.20982	0.00434145	9.15e-05	0.00026766
INCENP	protein_coding	3.8795	-0.57061	-1.23056	0.0200543	9.15e-05	0.00029788
NADSYN1	protein_coding	5.0724	0.63502	0.79838	0.00108542	9.25e-05	0.00019157
POLA2	protein_coding	4.1591	-0.54544	-1.04225	0.0117265	9.25e-05	0.00029788
GRINA	protein_coding	4.4335	0.70842	0.87916	0.00098924	9.36e-05	0.00018838
NCL	protein_coding	10.6808	-0.46012	-0.71122	0.00420835	9.4e-05	0.00027298
WHSC1	protein_coding	6.8847	-0.60743	-0.77632	0.0012464	9.55e-05	0.00020539
STEAP1B	protein_coding	5.0208	-0.7242	-0.87685	0.00081226	9.68e-05	0.00017632
ACTA2	protein_coding	1.3796	2.07148	1.88808	0.00010605	9.75e-05	5.84e-05
TMEM106C	protein_coding	4.7958	-0.75081	-1.19282	0.00426505	9.75e-05	0.00028124
C15orf52	protein_coding	3.2376	0.65333	1.04462	0.00546434	9.75e-05	0.00029065
TACC3	protein_coding	4.8653	-0.67274	-1.13526	0.00628804	9.8e-05	0.00029788
TP53INP2	protein_coding	5.571	0.05133	0.75677	0.758129	9.82e-05	0.00012918
C5orf34	protein_coding	1.7641	-0.52816	-1.32382	0.0358564	9.89e-05	0.00031467
BCLAF1	protein_coding	7.9126	-0.05365	-0.72964	0.734992	0.0001	0.00013525
RP11-473N11.2	processed_pseudogene	4.1632	-0.5044	-0.84881	0.0062293	0.0001	0.00030294
NACAD	protein_coding	1.8664	0.9878	1.27586	0.00143011	0.0001006	0.000221
PRPS2	protein_coding	4.3713	-0.73185	-0.9805	0.00154113	0.0001006	0.00022623
SSX2IP	protein_coding	3.5887	-0.50994	-1.02664	0.0158893	0.0001006	0.0003298
C1orf112	protein_coding	3.8213	-0.67937	-1.2118	0.00840531	0.00010061	0.000318
RFWD3	protein_coding	5.6495	-0.34866	-0.79815	0.0327802	0.00010379	0.0003328
RP11-511H9.4	NA	1.8804	-0.79141	-1.16686	0.00247672	0.00010474	0.00026698
H2AFV	protein_coding	6.7415	-0.78538	-0.78211	0.0002376	0.00010611	0.00010128
RP11-307P22.1	processed_pseudogene	1.0487	-1.23309	-1.65993	0.00126213	0.00010611	0.00022009
KIF4B	protein_coding	3.6149	-0.94347	-1.35073	0.00224443	0.00010713	0.0002658
RFC5	protein_coding	3.6813	-0.49853	-1.12547	0.0280617	0.00010713	0.00034284
RAD21	protein_coding	7.2181	-0.58778	-0.96307	0.00650927	0.00010795	0.00032871
TCEA3	protein_coding	1.1789	1.7833	1.68234	0.00014341	0.00010924	7.93e-05
MRAS	protein_coding	3.2887	0.49058	0.99135	0.0212391	0.00010924	0.00035203
HOPX	protein_coding	2.6665	-1.25717	-1.09513	8.65e-05	0.00010992	5.27e-05
SUV39H1	protein_coding	3.1909	-0.66066	-1.48319	0.024998	0.00011042	0.00035545
HSPD1	protein_coding	8.5756	-0.56467	-0.87937	0.00499516	0.00011202	0.000327
NPM1P6	processed_pseudogene	4.9367	-0.49442	-0.82062	0.00653206	0.00011257	0.00033871
ARL13B	protein_coding	3.924	-0.38308	-0.90461	0.0355795	0.00011281	0.00035608
POLE2	protein_coding	2.2515	-0.81502	-1.22122	0.00295773	0.00011299	0.00029657
NPM1P39	processed_pseudogene	5.4665	-0.60348	-0.81408	0.00191865	0.00011322	0.00026566
RIBC2	protein_coding	0.1231	-1.22194	-2.26073	0.00650927	0.00011421	0.00034284
DIAPH3	protein_coding	6.0525	-0.73495	-1.21893	0.00678342	0.00011421	0.00034385
NASP	protein_coding	6.8872	-0.56011	-0.87926	0.00531852	0.0001147	0.00033694
TFAM	protein_coding	5.1821	-0.42833	-0.92674	0.0260789	0.0001154	0.00037287
MALAT1	misc_RNA	12.6239	0.52407	0.73564	0.00272824	0.00011612	0.00029788
PSMC3IP	protein_coding	1.3414	-0.82174	-1.36589	0.00493456	0.00011792	0.00033871
SHISA3	protein_coding	1.233	-1.1768	-1.48552	0.00096717	0.00012017	0.00021817
NUP88	protein_coding	5.4447	-0.64194	-0.77989	0.00098924	0.0001207	0.00022088
RAD1	protein_coding	4.2799	-0.64183	-0.90748	0.00251538	0.0001207	0.00029788
ACTL6A	protein_coding	5.5514	-0.34141	-0.8004	0.03887	0.00012137	0.00038404
KPNB1	protein_coding	7.6419	-0.55624	-0.66781	0.0009907	0.00012254	0.00022266
LYAR	protein_coding	4.4356	-0.65754	-0.89459	0.00199926	0.00012481	0.00028773
CDC25C	protein_coding	2.7635	-0.91188	-1.468	0.00489662	0.00012481	0.00035203
SYNPO	protein_coding	6.9357	0.21974	0.69215	0.119459	0.00012746	0.00034253
LRRCC1	protein_coding	1.6515	-0.59336	-1.39835	0.0308908	0.00012746	0.00040415
TMEM194A	NA	4.8909	-0.43831	-0.91548	0.0229547	0.00012746	0.00040562
DDX21	protein_coding	7.1621	-0.15244	-0.69467	0.278421	0.00012762	0.00027413
ATHL1	protein_coding	2.1741	0.38164	1.22123	0.133299	0.00012851	0.00033871
CEP78	protein_coding	5.2173	-0.51418	-0.96305	0.0137202	0.00012851	0.00040562
SCLT1	protein_coding	4.6239	-0.52431	-0.93076	0.0102583	0.00012881	0.00040097
NIPAL3	protein_coding	4.2363	0.79837	0.83761	0.00038489	0.00012973	0.00015412
CDC20	protein_coding	4.1928	-1.03985	-1.45171	0.00225159	0.00013072	0.00031016
FABP4	protein_coding	1.2266	-2.77764	-1.76067	1.5e-05	0.00013078	1.11e-05
CISD1	protein_coding	5.4633	-0.66005	-0.70244	0.00041566	0.00013078	0.00016382
SEMA3D	protein_coding	2.7232	-0.78231	-1.02217	0.00154	0.00013078	0.00027453
SLC7A14	protein_coding	0.2885	1.18757	1.35805	0.00080287	0.00013182	0.00021383
CEACAM19	protein_coding	3.042	0.97438	1.2456	0.00164659	0.00013284	0.00028465
CDCA8	protein_coding	4.3383	-0.87646	-1.51607	0.00823246	0.00013285	0.00040357
RP11-363E7.4	sense_overlapping	3.1001	1.21483	1.04493	9.27e-05	0.00013349	5.84e-05
CCNB2	protein_coding	5.1611	-0.9034	-1.35525	0.00387441	0.00013349	0.0003612
NISCH	protein_coding	4.8158	0.3143	0.84731	0.0753813	0.00013349	0.00039473
TROAP	protein_coding	3.2185	-0.51292	-1.28911	0.0459972	0.00013349	0.00041891
HSPA8P8	processed_pseudogene	3.2737	-0.53636	-1.00449	0.0130225	0.00013349	0.00042513
RFC2	protein_coding	3.6187	-1.04346	-1.19416	0.00067648	0.00013368	0.00020358
DSCC1	protein_coding	0.933	-0.75427	-1.8398	0.0309806	0.00013368	0.00042964
TFDP1	protein_coding	7.4688	-0.71267	-0.74261	0.00039391	0.00013391	0.00016132
AHSA2	protein_coding	4.4109	0.53685	0.7766	0.00363041	0.00013409	0.00035905
PSMG1	protein_coding	5.8448	-0.59195	-0.85191	0.00332955	0.00013639	0.00035608
CES2	protein_coding	3.1661	1.15645	0.99487	9.51e-05	0.00013947	6.12e-05
GINS3	protein_coding	3.2101	-0.78764	-1.34142	0.00774304	0.0001421	0.00042513
HMGN2P4	processed_pseudogene	1.3487	-0.98453	-1.31932	0.00162517	0.00014419	0.00029887
TNFRSF10D	protein_coding	6.7097	-0.00752	0.70674	0.965135	0.00014435	0.00013961
BRIX1	protein_coding	4.2483	-0.34739	-0.99153	0.0807091	0.0001475	0.0004279
MRPL17	protein_coding	5.2407	-0.68653	-0.69186	0.0003232	0.00015052	0.00015136
TYMS	protein_coding	5.7346	-0.69267	-1.03034	0.00426627	0.00015052	0.00040342
SLC2A11	protein_coding	1.7118	0.64167	1.28942	0.0258681	0.00015167	0.00048057
TRBC2	TR_C_gene	6.7493	-0.74757	-1.0208	0.00272635	0.00015198	0.0003639
LMNB2	protein_coding	5.581	-0.60423	-0.8452	0.0030294	0.00015198	0.00037506
PRIM2	protein_coding	4.2697	-0.63134	-1.03457	0.00711839	0.00015251	0.00044617
MTHFD1P1	processed_pseudogene	1.8764	-0.61197	-1.0603	0.00858685	0.00015337	0.00046135
WDR62	protein_coding	1.661	-0.50121	-1.43465	0.0675673	0.00015474	0.00046204
PLTP	protein_coding	3.5365	1.04376	0.90595	0.00010837	0.00015502	7.34e-05
DIS3L	protein_coding	4.5669	-0.43001	-0.74131	0.0101659	0.00015681	0.00047703
NEDD1	protein_coding	4.3549	-0.36095	-0.85564	0.0437601	0.00015722	0.00048979
HIST1H2BL	protein_coding	-0.1517	-1.00322	-2.25089	0.0199665	0.00015722	0.00050238
CENPM	protein_coding	2.218	-1.19697	-1.75511	0.00299118	0.00015828	0.00038584
CECR1	protein_coding	3.5651	0.2762	0.90628	0.149377	0.00015828	0.0004094
THBS3	protein_coding	2.5122	0.41277	1.04868	0.0680241	0.0001616	0.00048057
FANCA	protein_coding	3.5385	-0.63199	-1.15803	0.0128092	0.0001616	0.00050238
AC012360.6	antisense	4.2236	0.79947	0.86073	0.00057862	0.0001658	0.00021383
EME1	protein_coding	2.0925	-0.57606	-1.3062	0.0313036	0.00017026	0.00053892
DONSON	protein_coding	4.3352	-0.76413	-0.86441	0.00081194	0.00017616	0.00025043
RGS4	protein_coding	5.9962	-0.60962	-0.92936	0.00573525	0.00017617	0.00047871
MIR22HG	lincRNA	3.6679	0.2597	0.91602	0.183806	0.00017633	0.00042837
C2orf66	protein_coding	-0.9998	1.0873	2.3158	0.0393293	0.00017633	0.00055301
FANCB	protein_coding	1.9748	-0.67563	-1.57544	0.0339841	0.00017736	0.00055982
HIST1H4E	protein_coding	3.6144	-1.12014	-1.53909	0.0025053	0.00017767	0.00039736
SLFN5	protein_coding	6.6616	0.88006	0.66979	5.22e-05	0.0001827	4.08e-05
ACER2	protein_coding	2.3341	1.31896	1.1491	0.00012119	0.00018302	8.5e-05
CCDC88A	protein_coding	6.9473	-0.21354	-0.61971	0.104372	0.00018302	0.00050486
DYSF	protein_coding	6.1487	-0.02825	0.71515	0.870156	0.00018356	0.00015464
STAG1	protein_coding	5.6011	-0.56131	-0.80514	0.00399767	0.00018974	0.00047114
FARSB	protein_coding	5.7985	-0.42302	-0.70761	0.0103021	0.00019038	0.00056372
SEZ6L2	protein_coding	-0.1284	1.0174	1.71128	0.0128458	0.00019139	0.00058224
HSPH1	protein_coding	7.3285	-0.1004	-0.63183	0.465552	0.00019243	0.00033694
CDC20P1	processed_pseudogene	2.1289	-1.20022	-1.59671	0.00193845	0.00019257	0.00038574
POLR2D	protein_coding	4.1907	-0.59807	-0.75969	0.00182101	0.00019271	0.00037693
RP11-153M3.1	processed_pseudogene	4.1435	-0.65165	-0.91886	0.00339113	0.00019496	0.00046204
MOV10L1	protein_coding	3.6105	0.72396	0.90658	0.0018689	0.00019515	0.00038491
TTLL3	protein_coding	2.682	0.3009	1.12521	0.219475	0.0001967	0.00045864
ANP32A	protein_coding	6.6381	-0.52641	-0.62861	0.00138226	0.00019874	0.00034472
SLFN11	protein_coding	5.5743	-1.09924	-0.69094	1.5e-05	0.00019887	1.18e-05
RCC1	protein_coding	4.2952	0.17177	-0.89618	0.346208	0.00019887	7.78e-05
PSIP1	protein_coding	5.5369	-0.35181	-0.81532	0.0468124	0.00020167	0.00062247
DRAXIN	protein_coding	-0.5687	2.38479	2.24708	0.00025052	0.00020217	0.00014603
PPAT	protein_coding	4.8288	-0.68589	-0.87782	0.0019959	0.0002023	0.00040342
NLRP1	protein_coding	5.3521	0.71845	0.70647	0.00035417	0.00020351	0.000183
AMY2B	protein_coding	0.1845	0.94422	1.73598	0.0201915	0.00020351	0.00063898
PRR11	protein_coding	6.0317	-0.725	-0.99073	0.00325886	0.00020455	0.00047185
UCHL5	protein_coding	5.6555	-0.56304	-0.77374	0.0033089	0.00020472	0.00047703
APOD	protein_coding	1.0699	1.38402	1.72539	0.00195364	0.00020647	0.00040559
TAF5	protein_coding	2.5428	-0.50009	-1.05304	0.0280984	0.00020768	0.00065546
CKS2	protein_coding	5.3666	-0.83053	-1.36669	0.00925082	0.00020904	0.00060738
KDM5B	protein_coding	6.1519	0.50922	0.6235	0.00173033	0.00020961	0.00039422
RP4-775C13.1	processed_pseudogene	4.894	-0.42093	-0.68601	0.00920103	0.00020961	0.0006114
JUP	protein_coding	5.134	0.4657	0.85476	0.018845	0.00020961	0.00065551
ZNF185	protein_coding	6.4862	0.31251	0.65712	0.0348737	0.00020961	0.00065746
ASTN2	protein_coding	0.3177	1.69857	1.70444	0.00040565	0.00021022	0.00020249
MPHOSPH9	protein_coding	5.1763	-0.53993	-0.85463	0.00784122	0.00021201	0.00060413
CIT	protein_coding	5.5284	-0.58866	-1.09193	0.0177912	0.00021201	0.00065929
CTDSPL2	protein_coding	4.7874	-0.44085	-0.83242	0.019059	0.00021201	0.00066433
KIF2C	protein_coding	3.869	-0.7111	-1.57069	0.0337149	0.00021201	0.00066736
SRSF7	protein_coding	7.2823	-0.64585	-0.80223	0.00193845	0.00021579	0.00041967
C7orf41	NA	3.6975	0.82722	1.05951	0.00236908	0.00021579	0.00045078
NIF3L1	protein_coding	3.5221	-0.35252	-0.94217	0.0750072	0.00021579	0.0006412
SERBP1P1	processed_pseudogene	5.661	-0.59609	-0.71796	0.00154	0.00021679	0.00038574
LSM3	protein_coding	4.085	-0.51662	-0.8019	0.00678342	0.00021775	0.00060413
GABBR1	protein_coding	3.8992	0.39627	0.84914	0.0395703	0.00021775	0.00067966
SLC4A11	protein_coding	1.6124	1.08602	1.33431	0.0018689	0.00022009	0.00041891
OIP5	protein_coding	0.4997	-0.8594	-1.55879	0.0123188	0.00022157	0.00066608
CMSS1	protein_coding	4.6108	-0.47506	-0.84567	0.0147828	0.00022874	0.00069018
RFC1	protein_coding	6.2972	-0.30736	-0.69128	0.0461501	0.00022874	0.0007021
TRIM66	protein_coding	2.533	0.7484	0.98681	0.00302912	0.00023078	0.00050731
CCDC150	protein_coding	3.3302	-0.42783	-1.21702	0.0920224	0.00023126	0.00066433
PEAR1	protein_coding	6.019	0.69072	0.64344	0.00027908	0.00023184	0.00016677
FAT1	protein_coding	4.3061	1.03045	0.7772	5.67e-05	0.00023191	4.46e-05
C4orf46	protein_coding	4.6329	-0.72316	-1.15636	0.00839435	0.00023249	0.00065658
CCND2	protein_coding	2.9092	0.4948	1.06621	0.0430841	0.00023299	0.00072252
PXDN	protein_coding	8.101	0.22466	0.70507	0.145405	0.00023381	0.00062318
MLTK	NA	6.0346	-0.38517	-0.67811	0.0153928	0.00023381	0.00070914
MMP2	protein_coding	8.5552	-0.0503	0.6639	0.754979	0.00023681	0.00017116
CBX3	protein_coding	6.3693	-0.62082	-0.72294	0.00135636	0.00023681	0.00038735
UBR7	protein_coding	4.2976	-0.70683	-0.99012	0.00383347	0.00023681	0.00056501
NPM1P24	processed_pseudogene	5.4577	-0.53091	-0.83914	0.00856309	0.00023681	0.00066891
CEP192	protein_coding	6.0543	-0.33981	-0.63686	0.0213636	0.00024021	0.00074395
SRSF3	protein_coding	8.2361	-0.62972	-0.87967	0.00443157	0.00024034	0.00060001
TEP1	protein_coding	4.1999	0.50951	0.78833	0.00840671	0.00024167	0.00067656
C17orf53	protein_coding	2.1142	-0.14273	-1.05098	0.519585	0.00024426	0.0004094
HNRNPF	protein_coding	6.984	-0.38707	-0.67139	0.0153547	0.00024601	0.00074276
HIST2H2BE	protein_coding	1.3438	-1.02972	-1.17932	0.00098154	0.00024679	0.00034253
TTYH3	protein_coding	6.1686	0.67192	0.76398	0.00122598	0.00024679	0.00038063
AC022182.2	processed_pseudogene	4.0812	-0.75416	-0.95429	0.00211591	0.00024967	0.00047894
RP11-673C5.1	processed_pseudogene	3.9772	-0.76675	-1.00475	0.00265548	0.00025027	0.00051832
ENOPH1	protein_coding	5.4039	-0.45999	-0.68999	0.0065627	0.00025075	0.00066933
ERLIN1	protein_coding	6.464	-0.42015	-0.6809	0.0108297	0.00025102	0.00072771
LPAR1	protein_coding	3.4668	-1.06621	-0.79856	6.7e-05	0.00025791	5.32e-05
CDKN2D	protein_coding	2.1534	-1.05899	-1.13677	0.00073739	0.00025791	0.00029788
SERPINB2	protein_coding	3.9488	-0.77389	-0.96079	0.00192786	0.00025791	0.00047143
SLC8A1	protein_coding	1.2016	-0.87744	-1.27415	0.00405558	0.00025791	0.00061461
CDH5	protein_coding	9.0714	0.30736	0.604	0.0291792	0.00025852	0.00081488
ALDH1A2	protein_coding	4.1884	-0.65076	-0.85457	0.00284012	0.0002638	0.00055651
HMMR	protein_coding	5.0637	-0.95102	-1.18904	0.00212177	0.0002687	0.00050435
CTD-2562J17.7	antisense	3.1431	0.42325	1.092	0.0882583	0.00026903	0.00078152
PSTPIP2	protein_coding	4.0608	1.3855	1.15552	0.00012579	0.00026911	0.00010054
FANCD2	protein_coding	4.4352	-0.62515	-1.03392	0.0110519	0.00027021	0.00078152
GPR173	protein_coding	2.5098	0.54819	1.08537	0.0321853	0.00027021	0.00085308
MED30	protein_coding	2.001	-0.52458	-1.21573	0.0447135	0.00027628	0.00086272
TOX	protein_coding	4.4701	-0.41777	-0.71943	0.0146022	0.0002856	0.00085018
SKA2	protein_coding	4.7711	-0.83951	-0.89716	0.00084492	0.00028801	0.00033943
PTGES3	protein_coding	6.5568	-0.55875	-0.78442	0.00516523	0.00028897	0.00069658
CEACAM1	protein_coding	1.7847	2.26952	1.6448	4.88e-05	0.00029036	4.11e-05
RMI1	protein_coding	3.0967	-1.03437	-1.23305	0.00159256	0.00029159	0.00047039
LRP10	protein_coding	6.1441	0.70718	0.67716	0.00040565	0.00029269	0.00023005
HERC2P9	transcribed_unprocessed_pseudogene	5.1383	0.34013	0.65865	0.0291698	0.00029422	0.00091158
POC5	protein_coding	2.8314	-0.43461	-0.92127	0.0359098	0.00029422	0.00091303
CCP110	protein_coding	4.9493	-0.21078	-0.83381	0.244063	0.00029477	0.00067656
KALRN	protein_coding	4.1125	0.46752	0.84211	0.021064	0.00029534	0.00090479
LRR1	protein_coding	2.6644	-0.97783	-1.20415	0.00193382	0.00029609	0.00051604
HSPA14	protein_coding	4.4641	-0.53545	-0.70518	0.00326047	0.00029852	0.00063608
MST1	protein_coding	-0.239	1.25633	1.63922	0.00352935	0.00029852	0.00065546
PGPEP1	protein_coding	2.8016	0.64384	1.05666	0.0134405	0.00029852	0.00087869
SAAL1	protein_coding	4.8336	-0.47787	-0.88981	0.021607	0.00029852	0.00091553
PLXNB1	protein_coding	2.9142	0.76131	1.13593	0.00808605	0.00029859	0.0008048
RHBDF1	protein_coding	3.61	0.73329	1.00649	0.00476491	0.00030083	0.00070914
CCDC84	protein_coding	4.2651	0.45866	0.73931	0.0120839	0.00030083	0.00087341
LDHAP4	processed_pseudogene	4.3706	-0.81893	-0.80832	0.00048957	0.0003048	0.00026566
LTBP3	protein_coding	3.1321	0.55528	0.95776	0.0176168	0.00030495	0.00091857
PPIF	protein_coding	4.335	-0.6455	-0.72456	0.00121047	0.00030626	0.00042539
CCDC77	protein_coding	3.5686	-0.38037	-1.03074	0.0895477	0.00030626	0.00089678
RNASEH2A	protein_coding	3.5074	-0.6168	-1.14536	0.0200543	0.00030641	0.00093252
CKAP5	protein_coding	7.9829	-0.42758	-0.74529	0.0179573	0.00030692	0.00092542
SH3YL1	protein_coding	3.7565	0.21157	0.77238	0.228466	0.00030728	0.00072786
CCDC18	protein_coding	3.3968	-0.47571	-0.9766	0.0327113	0.00031205	0.00096072
SMCHD1	protein_coding	6.2142	-0.28529	-0.68918	0.0689315	0.00031332	0.00093598
SUV39H2	protein_coding	3.6352	-0.54006	-1.103	0.0316362	0.00031445	0.00096916
KNSTRN	protein_coding	4.6549	-0.78934	-1.14492	0.00595062	0.00031761	0.00079058
EMP2	protein_coding	3.4205	-0.59529	-0.98811	0.0123573	0.00031767	0.00091553
SNRPN	protein_coding	1.2416	0.55256	1.24908	0.0609435	0.00031809	0.00096071
MTRNR2L2	processed_pseudogene	7.8469	-0.88714	-0.84596	0.00042896	0.00031965	0.00025161
POLE	protein_coding	4.3819	-0.38788	-0.79396	0.0343539	0.00031965	0.00098322
CDK4	protein_coding	5.1586	-0.39979	-0.75319	0.0248106	0.00032051	0.00097956
MRPL3	protein_coding	5.453	-0.33093	-0.68583	0.037898	0.00032051	0.00098499
ITGB3	protein_coding	6.46	0.21372	0.64615	0.14604	0.00032179	0.00087207
CCDC41	NA	4.0482	-0.26526	-0.74857	0.108296	0.00032406	0.00092007
PPIL1	protein_coding	4.4538	-0.58841	-0.77016	0.00332586	0.00032412	0.00067885
LSM6	protein_coding	3.3746	-0.62335	-0.94031	0.00757609	0.00032412	0.00086214
RECQL4	protein_coding	1.7722	-0.53734	-1.11867	0.0314454	0.00032412	0.0009993
CKS1B	protein_coding	3.7067	-0.91939	-1.42271	0.00817977	0.00032815	0.00087869
ZKSCAN1	protein_coding	6.4457	0.52568	0.64478	0.00257782	0.00033768	0.00063988
NUDCD2	protein_coding	5.5751	-0.82965	-0.77246	0.00037389	0.00034028	0.00023309
BIRC5	protein_coding	3.9481	-1.29943	-1.45352	0.00122548	0.00034089	0.00046107
PTMAP5	transcribed_processed_pseudogene	6.4617	-0.76637	-0.9344	0.0024421	0.00034089	0.00063608
NCAPD2	protein_coding	5.8619	-0.52683	-0.82268	0.0104524	0.00034089	0.00093814
NUP155	protein_coding	6.2264	-0.45857	-0.7265	0.0115499	0.00034089	0.00095843
FAM161A	protein_coding	2.2688	-0.4224	-1.15498	0.0908979	0.00034089	0.00098322
PTTG3P	processed_pseudogene	2.4099	-0.91396	-1.24352	0.00383161	0.00034119	0.00073929
MZT1	protein_coding	3.7696	-0.66999	-1.08196	0.0113391	0.00034119	0.00095843
ADAMTS7	protein_coding	4.0187	0.5808	0.97433	0.0163473	0.00034119	0.00100189
TMEM132A	protein_coding	2.6853	0.44555	0.95081	0.0492561	0.00034119	0.00104944
CEBPZ	protein_coding	5.2185	-0.10767	-0.715	0.515441	0.00034539	0.00060413
RDX	protein_coding	7.8234	-0.48341	-0.66528	0.00539424	0.00034539	0.00083342
CDCA5	protein_coding	4.2848	-0.66554	-1.59775	0.0596023	0.00034756	0.00105291
HIST1H3E	protein_coding	0.8246	-0.62655	-1.26275	0.0262513	0.00035112	0.00106627
HNRNPD	protein_coding	8.5101	-0.57408	-0.6624	0.00181659	0.00035479	0.00057361
EIF1AXP1	processed_pseudogene	4.2205	-0.40678	-0.91592	0.0518967	0.00035515	0.00107561
TBC1D4	protein_coding	6.5195	-0.66992	-0.63907	0.00047479	0.00035689	0.00028156
RP11-93I21.3	lincRNA	0.409	1.05813	1.60217	0.0103021	0.00035811	0.00097715
MRPL18	protein_coding	5.0605	-0.56089	-0.79613	0.00606852	0.00035981	0.00088725
AADAC	protein_coding	0.0349	1.43731	2.3305	0.0155653	0.0003611	0.00105003
AGPAT5	protein_coding	5.6429	-0.40595	-0.69393	0.0170256	0.00036214	0.00106118
PLXNB3	protein_coding	0.5497	1.36263	1.78783	0.0043695	0.00036369	0.00081488
FRAS1	protein_coding	2.8157	0.59923	0.989	0.0158538	0.00036764	0.00106285
CWC22	protein_coding	4.6895	-0.27375	-0.70765	0.0883408	0.00036797	0.00106676
GPD2	protein_coding	4.799	-0.42281	-0.76529	0.0217041	0.00036797	0.00109778
YEATS4	protein_coding	3.2564	-0.42947	-0.94286	0.0468236	0.00036797	0.00111833
CENPW	protein_coding	4.0101	-1.0627	-1.29654	0.00225832	0.00037422	0.00065551
PIDD	NA	2.0944	1.3844	1.25975	0.00033078	0.00038286	0.00022715
NUAK1	protein_coding	6.3094	0.62607	0.66108	0.00106381	0.00038647	0.00046135
ICT1	protein_coding	4.4405	-0.46504	-0.67492	0.00718613	0.00038647	0.00096072
RP11-142L4.3	processed_pseudogene	5.0316	-0.44007	-0.77132	0.0195249	0.00038647	0.00113047
AC006026.9	processed_pseudogene	2.8397	-0.45917	-0.85408	0.0237316	0.00038647	0.00114444
EPB41L1	protein_coding	2.5325	0.45538	0.99278	0.0563082	0.00038647	0.00115621
LINC00894	antisense	1.2101	0.82736	1.39032	0.0184136	0.00038771	0.00113024
PA2G4P4	processed_pseudogene	5.7445	-0.26381	-0.61031	0.0649076	0.00038841	0.00115249
CHAC2	protein_coding	2.456	-0.86661	-1.22041	0.00539424	0.00038939	0.0009111
ATF3	protein_coding	2.0257	1.86977	1.30234	4.8e-05	0.00039039	4.23e-05
SAE1	protein_coding	6.3786	-0.59624	-0.72265	0.00265035	0.00039365	0.00071073
NUDT21	protein_coding	6.4483	-0.46756	-0.72226	0.0112178	0.00039449	0.00106676
CCDC15	protein_coding	2.6716	-0.49653	-1.07719	0.0448506	0.00039449	0.00118247
FSTL3	protein_coding	3.6756	0.48609	0.8452	0.0213636	0.00039771	0.00116612
CTD-2027G2.1	processed_pseudogene	0.7834	-0.99689	-1.56434	0.00729977	0.00039868	0.00098737
PCYOX1L	protein_coding	3.3496	0.25335	0.90616	0.236431	0.00039927	0.00095843
MANEA	protein_coding	4.6145	-0.71276	-0.84799	0.00217472	0.00040224	0.00067311
TRANK1	protein_coding	3.4919	0.66897	0.87713	0.00443157	0.00040582	0.00089323
CTD-2267D19.6	NA	0.4932	-1.31591	-1.96325	0.00585248	0.00040582	0.00095532
NETO2	protein_coding	4.4078	-0.38187	-0.75444	0.0339841	0.00040582	0.00121546
TMEM198B	unitary_pseudogene	1.9283	0.85849	1.17055	0.00587954	0.00040698	0.00095929
TTF2	protein_coding	4.9603	-0.53613	-0.75634	0.00640307	0.00040698	0.00097956
ZNF862	protein_coding	2.2143	0.70605	1.10608	0.0130225	0.00040698	0.00113047
HSPA8P7	processed_pseudogene	2.4808	-0.3843	-0.89756	0.0601999	0.00040698	0.00120691
FAM98B	protein_coding	4.3042	-0.3632	-0.76558	0.0440102	0.00040698	0.00122225
FDXR	protein_coding	3.4794	1.62684	1.15978	6.06e-05	0.00040904	5.37e-05
HAT1	protein_coding	5.0807	-0.45837	-1.32318	0.125017	0.00041134	0.00113317
STMN1	protein_coding	6.7762	-0.90471	-1.06472	0.00225597	0.00041182	0.00069407
CEP290	protein_coding	5.4629	0.05556	-0.65492	0.737257	0.00041294	0.00028211
ARL6IP1	protein_coding	6.0264	-0.42847	-0.79099	0.0272173	0.00041537	0.00123542
EBNA1BP2	protein_coding	6.6754	-0.49371	-0.62774	0.00375076	0.00041643	0.00086796
TTC18	NA	-0.7606	1.76399	2.03087	0.0020513	0.00041738	0.0006734
TP53I3	protein_coding	4.2272	0.86961	0.82938	0.00053743	0.00041898	0.000327
RPA3	protein_coding	2.3741	-0.78209	-1.16703	0.00806573	0.00042065	0.00106049
BUB3	protein_coding	6.4952	-0.40479	-0.77235	0.0327328	0.0004246	0.00127814
MRPL39	protein_coding	4.3496	-0.19256	-0.67936	0.213517	0.00042906	0.00106049
VIP	protein_coding	0.2695	1.58844	2.03739	0.00426609	0.00042927	0.00091682
ENY2	protein_coding	6.1729	-0.47099	-0.62481	0.00498896	0.00043585	0.00096072
MEG9	lincRNA	-0.0529	0.66072	1.62167	0.0979416	0.000437	0.00123542
CHML	protein_coding	4.7644	0.03848	-0.73405	0.839147	0.00043945	0.00034385
FBXO44	protein_coding	1.3389	0.85806	1.2233	0.00826815	0.00044178	0.00109816
PVT1	lincRNA	5.1808	0.73757	0.78611	0.00126689	0.00044309	0.00054999
TRIM38	protein_coding	5.4731	0.61451	0.66784	0.00145534	0.00044682	0.00060131
RP3-412A9.10	NA	1.0457	0.94048	1.18392	0.00375076	0.00044682	0.00090479
SCML1	protein_coding	3.6127	-0.64873	-0.84241	0.00396759	0.00044682	0.00091919
HECTD4	protein_coding	5.944	0.45347	0.61446	0.00598056	0.00044682	0.00103455
PTPRS	protein_coding	2.6051	0.40124	1.12969	0.140384	0.00044682	0.00119894
RPF1	protein_coding	4.3399	-0.41061	-0.70216	0.0185077	0.00044682	0.00127979
NOP56	protein_coding	6.2079	-0.65342	-0.69674	0.00129827	0.00045319	0.00056553
YPEL2	protein_coding	4.8574	0.15105	0.7409	0.400951	0.00045459	0.00091553
RBBP7	protein_coding	6.7156	-0.6336	-0.74801	0.00256938	0.0004605	0.00079058
FBXO43	protein_coding	0.727	-1.241	-1.80321	0.00606004	0.0004605	0.00105726
ZFHX4	protein_coding	1.9252	0.85007	0.93855	0.00162517	0.00046865	0.0006516
RP11-417L14.1	processed_pseudogene	1.7618	-0.73154	-1.0856	0.00794157	0.00046865	0.0011339
MRE11A	protein_coding	4.2973	-0.38826	-0.85003	0.0538071	0.00046865	0.00139274
SPTBN5	protein_coding	1.7132	0.31049	1.08967	0.240978	0.00047108	0.0011186
DDX46	protein_coding	7.1396	-0.32431	-0.5524	0.0209681	0.00047108	0.00135655
HSPA13	protein_coding	5.3605	-0.16915	-0.63479	0.252667	0.00047205	0.00110811
SYNCRIP	protein_coding	7.302	-0.40232	-0.58595	0.00946474	0.00047205	0.00118247
DCK	protein_coding	3.3474	-0.43096	-0.96902	0.0584515	0.00047775	0.0014153
RIOK1	protein_coding	6.0634	-0.33163	-0.67847	0.0456328	0.00047801	0.00142871
CASP8AP2	protein_coding	4.8016	-0.40714	-0.84201	0.0446265	0.00047922	0.00143023
YWHAH	protein_coding	6.0396	-0.76857	-0.69462	0.00041973	0.00048834	0.00029887
HLA-DPB1	protein_coding	1.5463	-0.7285	-1.20106	0.0137202	0.00048845	0.00132218
CCDC59	protein_coding	5.1868	-0.47019	-0.73577	0.0130848	0.00049275	0.00132025
RP11-67K19.3	antisense	-0.431	2.05595	1.89795	0.00047251	0.00049882	0.000327
SHANK3	processed_transcript	5.0133	0.49195	0.91427	0.0332568	0.0005004	0.0014721
RP11-132A1.4	antisense	0.6262	-0.96349	-1.37471	0.00600468	0.00050579	0.00111842
DARS2	protein_coding	4.9945	-0.6098	-0.75184	0.00334099	0.00050677	0.00093435
LSM5	protein_coding	3.762	-0.55069	-0.90658	0.016125	0.00050677	0.00138762
ALMS1	protein_coding	5.7977	-0.26794	-0.62275	0.0739894	0.00050708	0.0014721
DHX9	protein_coding	7.3619	-0.25472	-0.57026	0.0673276	0.00050708	0.00148473
TMEM63B	protein_coding	3.7267	0.62914	0.83611	0.00582191	0.00050801	0.00111602
PLK3	protein_coding	2.9724	1.23318	1.07581	0.0003232	0.00050896	0.00024544
RANP1	processed_pseudogene	5.9625	-0.64201	-0.78143	0.00329089	0.00051002	0.00093386
TM7SF2	protein_coding	1.4374	-0.01006	1.3241	0.980379	0.00051537	0.00049018
KTN1	protein_coding	7.6355	-0.25146	-0.58253	0.0765534	0.00051568	0.00149653
ZNF610	protein_coding	-0.4935	1.44322	2.74987	0.0432808	0.00051719	0.00153027
BRI3BP	protein_coding	3.1626	-0.56838	-0.79047	0.00672183	0.00052128	0.00117498
NAA50	protein_coding	6.1995	-0.22875	-0.63552	0.132372	0.00052128	0.0014137
FTX	lincRNA	5.0951	0.41877	0.74411	0.0276017	0.00052128	0.00151863
VEGFC	protein_coding	4.7927	-0.52571	-0.60893	0.00235855	0.00052518	0.00083576
SCARNA9	antisense	0.4083	-0.72629	-1.24278	0.0161517	0.00052518	0.00143371
ICMT	protein_coding	5.9827	-0.48177	-0.59616	0.00371042	0.00052537	0.00099444
TMEM150A	protein_coding	2.0623	0.73218	0.97993	0.00627597	0.00052704	0.00116612
FADS3	protein_coding	4.8438	0.62594	0.81779	0.00542379	0.00052766	0.00112468
KCNMA1	protein_coding	0.0611	1.42258	1.77488	0.00418878	0.00053161	0.00105003
CTD-3065B20.1	NA	1.7363	-0.79177	-1.16429	0.00826815	0.00053328	0.00126422
HMGN2P3	processed_pseudogene	1.2724	-0.81427	-1.40372	0.0166225	0.00053328	0.00146524
DDX10P2	processed_pseudogene	1.5489	-0.3787	-0.98279	0.0906009	0.0005371	0.00153266
TPR	protein_coding	8.2854	-0.07505	-0.58448	0.616586	0.00053756	0.0008696
RNF168	protein_coding	5.9477	-0.62938	-0.59002	0.00062355	0.00054076	0.00039808
CBX1	protein_coding	6.9952	-0.50323	-0.63875	0.00460051	0.00054076	0.00108845
CNRIP1	protein_coding	5.6059	-0.45515	-0.60311	0.00573918	0.00054076	0.00116521
RPF2	protein_coding	4.0326	-0.24676	-0.72279	0.145952	0.00054076	0.00144828
PLXNA2	protein_coding	8.7364	0.32793	0.65093	0.0449145	0.00054076	0.0016046
DCLRE1A	protein_coding	3.3608	-0.36804	-0.82914	0.0630405	0.00054261	0.0016045
SORL1	protein_coding	-0.2498	1.90935	2.38882	0.00443	0.00054306	0.00107996
ISCU	protein_coding	5.4804	0.62054	0.67376	0.00170185	0.0005474	0.00072585
APLN	protein_coding	7.646	-0.26172	0.5914	0.0739894	0.00055094	7.34e-05
GSN-AS1	antisense	1.3943	0.45109	1.11763	0.104977	0.00055094	0.00155386
TANC2	protein_coding	5.4616	0.39204	0.69741	0.0287285	0.00055276	0.00161264
POLR3K	protein_coding	3.8301	-0.80013	-0.84052	0.00128453	0.00055906	0.00063608
RP11-298C3.2	processed_pseudogene	3.9959	-0.92893	-0.80315	0.00033532	0.00055916	0.0002705
COQ3	protein_coding	2.6697	-0.78763	-1.05744	0.00560278	0.00055916	0.0011788
RMI2	protein_coding	2.6444	-0.75018	-1.28068	0.0186589	0.00055916	0.00155386
NOSTRIN	protein_coding	1.1273	-0.61917	-1.37551	0.053081	0.00055916	0.00165492
NUCKS1	protein_coding	8.0348	-0.54047	-0.61186	0.00233332	0.00056262	0.00087341
CDK5RAP2	protein_coding	5.9579	-0.26244	-0.7191	0.130273	0.00056285	0.00154274
GMPS	protein_coding	5.8219	-0.413	-0.67587	0.018443	0.00056285	0.00155997
MLH1	protein_coding	5.2527	-0.5069	-0.61078	0.0032882	0.00056599	0.00099832
COL4A5	protein_coding	4.406	0.18617	0.65791	0.248616	0.00056824	0.00135228
APBB3	protein_coding	0.7152	1.56631	1.49634	0.00072946	0.00057432	0.0004453
FAF1	protein_coding	4.7584	-0.45543	-0.6621	0.00996774	0.00057726	0.0014137
CCT5P1	processed_pseudogene	1.6361	-0.66237	-1.0897	0.0154261	0.00057865	0.00155386
CLSTN3	protein_coding	2.669	0.50551	1.02545	0.0527298	0.00057865	0.00171626
MARVELD1	protein_coding	5.1774	0.26506	0.65619	0.101989	0.00058185	0.00164454
CALCOCO1	protein_coding	4.3986	0.62684	0.75289	0.00340281	0.0005823	0.00103997
SNRPG	protein_coding	4.2319	-0.76288	-0.87302	0.00230336	0.00058457	0.00089163
PLEKHG2	protein_coding	4.4959	0.28135	0.73031	0.118895	0.00058457	0.00162981
LENG8	protein_coding	4.9033	0.49921	0.88832	0.0299689	0.00058457	0.00170969
WDR27	protein_coding	4.2597	0.49321	0.67256	0.00764511	0.00058905	0.00135155
SPDYE2	protein_coding	2.2412	0.64212	0.97844	0.0144178	0.00058905	0.00155997
AK5	protein_coding	2.9139	-0.64568	-0.93294	0.0091507	0.00059071	0.00141489
NUP54	protein_coding	4.4997	-0.41328	-0.76176	0.0311386	0.00059465	0.00173809
CENPO	protein_coding	3.9599	-0.48335	-0.88124	0.0290379	0.00059942	0.00173809
C1orf63	NA	3.9012	0.41752	0.77731	0.036784	0.0006007	0.00177484
LAMC2	protein_coding	2.9137	0.24199	0.93212	0.299731	0.00060137	0.00135458
LAMA3	protein_coding	3.7817	-0.61531	-0.8619	0.00786673	0.00060137	0.00137928
DMTN	protein_coding	2.59	0.62307	0.91266	0.0117927	0.00060137	0.00152621
SAMD4A	protein_coding	6.4732	0.37501	0.5889	0.0166225	0.00060137	0.00163291
NOL11	protein_coding	5.0958	-0.38915	-0.67568	0.0248716	0.00060149	0.00172752
MRPL35	protein_coding	5.8412	-0.29677	-0.57384	0.0411787	0.0006037	0.00179509
NEXN	protein_coding	3.8094	-0.63027	-0.86941	0.00741215	0.00060587	0.0013694
UBE2V2	protein_coding	4.6112	-0.46939	-0.68101	0.0101741	0.00060587	0.00148473
ARHGAP19	protein_coding	4.5993	-0.64291	-1.02451	0.0158167	0.00060587	0.00163291
STXBP5-AS1	antisense	1.4298	0.29931	1.04374	0.253792	0.00060677	0.00143984
CTNNAL1	protein_coding	5.7458	-0.87425	-0.77054	0.00043445	0.00060943	0.00033871
NDUFAF4	protein_coding	3.9028	-0.54444	-0.76828	0.0085059	0.00061021	0.00143003
SIDT2	protein_coding	3.8635	0.4831	0.70095	0.0111759	0.00061021	0.00153027
TUBG1	protein_coding	4.3649	-0.52317	-0.69671	0.00618942	0.00061295	0.00132025
TBC1D31	protein_coding	3.7265	-0.31705	-0.87351	0.127456	0.00061793	0.00171316
ASNSD1	protein_coding	5.1044	-0.35274	-0.63311	0.0295584	0.00061855	0.0018083
ANO2	protein_coding	4.6071	-0.05082	0.68684	0.793178	0.00061895	0.00046204
RP5-1099D15.1	processed_pseudogene	1.2766	-0.83938	-1.1061	0.00486434	0.00061895	0.00121607
PIK3CD	protein_coding	2.2339	0.66844	0.91268	0.00815983	0.00061895	0.00142964
PHF17	NA	5.237	-0.49257	-0.58663	0.003307	0.00062012	0.00106676
SRSF10	protein_coding	5.8856	-0.392	-0.58956	0.0130848	0.00062206	0.00161434
SPATA5	protein_coding	4.7237	-0.22275	-0.68336	0.175329	0.00062252	0.00163522
ANTXR1	protein_coding	4.2165	0.41863	0.93147	0.0751889	0.0006227	0.00183708
TIMM21	protein_coding	4.9562	-0.53951	-0.79734	0.0115298	0.00062548	0.00157315
RP11-443P15.2	transcribed_unprocessed_pseudogene	1.0279	0.9806	1.26489	0.00581765	0.00062896	0.00132025
MFAP2	protein_coding	2.4729	0.47115	0.81281	0.0275404	0.00062905	0.00183068
PTPRM	protein_coding	5.0796	0.31609	0.6766	0.0651865	0.00062905	0.0018688
KIAA0247	NA	4.4176	0.67025	0.69696	0.00144457	0.00062927	0.00072551
PIK3CG	protein_coding	3.8464	-0.23861	-0.81957	0.220542	0.00062927	0.00157105
KIAA1279	NA	5.3031	-0.35326	-0.58323	0.0206311	0.00062927	0.00177484
SAP30	protein_coding	2.0767	-0.44057	-1.22898	0.12116	0.00062927	0.00177484
ENKUR	protein_coding	0.6767	1.58791	1.91596	0.00394856	0.0006312	0.00116314
ACRC	protein_coding	0.8711	0.78858	1.1945	0.0150437	0.00063648	0.00169942
PLEKHG1	protein_coding	4.9568	0.47977	0.75305	0.0175861	0.00064624	0.0017716
TUBB	protein_coding	9.8114	-0.56146	-0.65112	0.00318015	0.0006484	0.00107543
DLG4	protein_coding	2.4478	0.18428	0.80745	0.370345	0.0006484	0.00136737
MPHOSPH6	protein_coding	5.4573	-0.44391	-0.64205	0.0108609	0.0006484	0.0016045
KIAA0319L	protein_coding	5.0022	0.3254	0.60454	0.0380133	0.00064972	0.00193271
LIN54	protein_coding	4.7147	-0.03258	-0.71815	0.868036	0.0006499	0.00080496
PAK1IP1	protein_coding	4.8225	-0.27605	-0.69974	0.106017	0.0006499	0.00186223
ABCE1	protein_coding	6.3837	-0.32837	-0.66645	0.0525658	0.0006499	0.00195184
RP11-264C15.2	NA	-0.5898	1.40182	1.80865	0.00626896	0.00066578	0.00140568
SDSL	protein_coding	0.1917	1.40979	1.34161	0.00081112	0.00066738	0.00050886
PARP3	protein_coding	2.2704	0.65925	0.93872	0.0109703	0.00066998	0.00164438
SLC6A8	protein_coding	4.0248	0.59564	0.74823	0.00517677	0.00067027	0.00132842
TEX30	protein_coding	3.1413	-0.50342	-1.00306	0.0440969	0.00067027	0.00199802
POC1A	protein_coding	3.0055	-0.66776	-1.37244	0.0461579	0.00067027	0.00199891
CXCL16	protein_coding	1.5381	0.91247	0.99284	0.00204339	0.00067902	0.00092131
ADAMTS4	protein_coding	4.1913	0.12066	0.96381	0.647239	0.00068213	0.00107569
NIP7	protein_coding	5.3845	-0.42847	-0.62183	0.0114801	0.00068267	0.00168741
AC019097.7	processed_pseudogene	4.549	-0.61476	-0.97627	0.0168067	0.00068378	0.00183708
OSBPL3	protein_coding	6.2547	0.62421	0.56009	0.00057862	0.00068737	0.00042513
MBD5	protein_coding	4.6347	0.49365	0.72577	0.0130225	0.00068737	0.00175627
HNRNPDP1	processed_pseudogene	3.2143	-0.84039	-0.77574	0.00067648	0.00068816	0.00046558
HAUS2	protein_coding	3.7158	-0.75205	-0.7108	0.00081194	0.00069083	0.00052446
RP11-336N8.4	processed_pseudogene	0.4651	-0.82454	-1.53596	0.0276298	0.00069083	0.00199442
CNTLN	protein_coding	4.8266	-0.30322	-0.6627	0.0670563	0.00069083	0.00205116
STOM	protein_coding	7.7871	0.8971	0.64129	0.00011157	0.00069434	0.00011375
ESF1	protein_coding	4.3584	0.04638	-0.81023	0.833048	0.00069434	0.00055982
PA2G4	protein_coding	5.9918	-0.28754	-0.59249	0.0569859	0.00069434	0.00207208
KIAA0586	protein_coding	5.3836	-0.24984	-0.63193	0.110606	0.00069783	0.00199442
ABCG1	protein_coding	2.4587	0.65738	0.91112	0.00982973	0.00070319	0.00166109
EPHA4	protein_coding	4.9317	0.21385	0.66571	0.203512	0.00070319	0.00180489
RAD54L	protein_coding	2.3793	-0.66868	-1.1222	0.0206311	0.00070589	0.00195848
CCT2	protein_coding	7.3377	-0.39829	-0.64263	0.0210587	0.00070589	0.00196522
TPP1	protein_coding	7.1677	0.36907	0.63692	0.0293226	0.00071099	0.00205533
ITGBL1	protein_coding	4.699	-0.65559	-0.66862	0.00138086	0.00071926	0.00075999
KLHL23	protein_coding	2.9309	-0.73327	-0.91142	0.00443157	0.00072052	0.00132651
CEP72	protein_coding	1.5079	-0.56262	-1.37888	0.0805551	0.00072247	0.00211417
GGCT	protein_coding	4.1679	-0.38633	-0.66703	0.0265621	0.00073117	0.00207576
DUOX1	protein_coding	1.286	0.87405	1.16597	0.00826815	0.00074731	0.00164454
CYCS	protein_coding	8.0218	-0.83477	-0.81868	0.00119708	0.00074916	0.00070193
GSN	protein_coding	5.5576	0.16198	0.63906	0.321111	0.00074916	0.00166515
FCHSD1	protein_coding	2.0678	0.65608	0.93102	0.0116332	0.00074916	0.00182218
CEP85	protein_coding	3.5154	-0.44928	-0.74988	0.0223768	0.00074916	0.00207321
MKI67IP	NA	5.2169	-0.26222	-0.64404	0.103663	0.00074916	0.00212755
RPA1	protein_coding	5.4616	-0.44512	-0.76389	0.0273931	0.0007493	0.00212217
ZSCAN18	protein_coding	1.2265	0.69195	1.16636	0.0281502	0.0007493	0.00212792
PSMD12	protein_coding	6.3826	-0.48696	-0.55404	0.00311542	0.00075459	0.00116521
UBE2J1	protein_coding	6.853	-0.79325	-0.53287	8.3e-05	0.00075781	8.25e-05
SKIV2L2	protein_coding	5.9298	-0.28976	-0.5975	0.0591435	0.00075948	0.00224189
MAMDC2	protein_coding	0.8011	1.03065	1.45494	0.0118202	0.00076161	0.00185185
BTG3	protein_coding	4.0827	-0.58389	-0.68009	0.00330454	0.00076402	0.00120691
C12orf5	NA	4.1769	0.57478	0.66396	0.00334239	0.00076402	0.00121607
EVI2B	protein_coding	0.948	-1.1191	-1.19946	0.00171894	0.0007649	0.00090355
ZFHX2	protein_coding	0.3174	1.1502	1.39964	0.00493456	0.0007649	0.00142765
LBR	protein_coding	5.9007	-0.51926	-0.64458	0.0052175	0.0007649	0.00144982
MICAL1	protein_coding	3.5444	0.47228	0.83165	0.0339835	0.0007649	0.00222057
XRCC4	protein_coding	2.073	-0.35645	-1.10904	0.174369	0.00076816	0.00203663
OAS3	protein_coding	3.4389	-0.19947	-0.78145	0.296173	0.00076906	0.00177484
BCAS3	protein_coding	3.2271	0.47295	0.79701	0.0278082	0.00077315	0.00220191
BX322557.10	processed_transcript	1.4264	0.49641	1.06576	0.0752864	0.00077473	0.00226836
AFF3	protein_coding	1.3051	1.51406	1.2354	0.00029756	0.00077583	0.00026905
XPO1	protein_coding	6.5313	-0.3089	-0.54805	0.0341951	0.00077583	0.00224485
TUBGCP3	protein_coding	4.6496	-0.43396	-0.64224	0.0133895	0.00077712	0.00195634
TXNDC16	protein_coding	2.5616	-0.82576	-0.97271	0.00343882	0.00077735	0.00125363
ZFYVE1	protein_coding	3.7156	0.51557	0.71377	0.0103594	0.00077802	0.00183197
ACADM	protein_coding	5.1483	-0.55065	-0.63396	0.00326745	0.00078062	0.00121836
MXD3	protein_coding	0.8848	-1.39729	-1.63247	0.00280565	0.00078192	0.00114644
SCN10A	protein_coding	-0.1427	-1.41712	-1.65339	0.00270028	0.00078229	0.00113047
EXOSC2	protein_coding	3.7235	-0.6966	-0.83608	0.00393008	0.00078229	0.00133976
WEE1	protein_coding	4.9858	-0.40938	-0.61251	0.0146324	0.00079953	0.00203663
KDM4B	protein_coding	3.4927	0.86974	0.80922	0.00083563	0.00079971	0.0005807
HAUS1	protein_coding	3.5088	-0.76624	-0.7547	0.00121047	0.00081047	0.00073971
CTD-2302E22.3	NA	1.9042	-0.67419	-1.06904	0.0172141	0.00081047	0.00212217
HSPA8P5	processed_pseudogene	3.286	-0.53894	-0.88325	0.0210587	0.00081047	0.00220415
DNAH1	protein_coding	2.2133	0.67123	1.15835	0.0328746	0.00081047	0.00233072
RAD54B	protein_coding	1.0103	-0.56661	-1.2541	0.0636739	0.00081047	0.00239155
KCTD9	protein_coding	5.2435	-0.18531	-0.68011	0.277023	0.00081144	0.00191951
ZNF462	protein_coding	5.3777	0.43762	0.60968	0.0111178	0.00081943	0.00193974
AHNAK2	protein_coding	7.7478	0.50202	0.69363	0.0108331	0.00082612	0.00193659
SLC6A4	protein_coding	-0.0375	1.25876	1.53283	0.00517677	0.0008296	0.00153027
SRP9	protein_coding	7.3447	-0.67436	-0.80702	0.00457618	0.00083067	0.00146748
SEC31B	protein_coding	2.0778	0.39073	1.11394	0.179519	0.0008347	0.00220191
PARP6	protein_coding	4.0718	0.59758	0.65254	0.00253452	0.00083666	0.00113317
ACSF2	protein_coding	1.2466	-0.04732	1.15628	0.895438	0.0008372	0.00073924
SLC12A4	protein_coding	3.6788	0.33708	0.77884	0.0974131	0.00084393	0.00241607
ABCA9	protein_coding	0.0172	-0.32492	1.25709	0.3566	0.00085573	0.00031133
TNFRSF21	protein_coding	6.0156	0.20071	0.59558	0.192329	0.00085573	0.00221805
ANXA4	protein_coding	5.8959	0.61767	0.58058	0.00098154	0.00086313	0.00067311
RLIMP1	processed_pseudogene	2.5168	0.56944	0.85906	0.0174444	0.00086413	0.00223847
NYNRIN	protein_coding	4.4328	0.27382	0.69144	0.127911	0.00086555	0.00240196
FAM214B	protein_coding	3.787	0.25217	0.74406	0.192371	0.00086669	0.00224278
DHX9P1	processed_pseudogene	2.7797	-0.35113	-0.74269	0.0629626	0.00086725	0.00253312
SYNGR1	protein_coding	0.9481	0.51306	1.19494	0.106305	0.00088362	0.00249376
MED21	protein_coding	5.0939	-0.3535	-0.67901	0.0474099	0.00088362	0.00255986
AC011526.1	NA	4.092	0.08079	0.70455	0.686938	0.00088564	0.00135007
HERC2P3	transcribed_unprocessed_pseudogene	2.4635	0.53281	0.87788	0.0273902	0.00088564	0.00244781
ZNF211	protein_coding	2.094	0.62386	0.90153	0.0142471	0.00088649	0.00219151
SPG7	protein_coding	5.3386	0.29526	0.72144	0.116714	0.00088838	0.00248999
XRCC6	protein_coding	6.9657	-0.4296	-0.63272	0.0155822	0.00088956	0.00223847
CCT5P2	processed_pseudogene	1.8562	-0.7907	-0.99677	0.00546434	0.00090081	0.00164452
TNFRSF10B	protein_coding	6.8928	0.53386	0.51037	0.00119103	0.00090147	0.00077025
YPEL3	protein_coding	2.2232	0.84884	0.96851	0.0035286	0.00090216	0.00138762
OXCT1	protein_coding	5.4792	-0.64238	-0.60143	0.00098154	0.00090477	0.00068502
DDX11	protein_coding	2.7517	-0.38102	-0.80828	0.0639552	0.00090721	0.00264323
SRSF1	protein_coding	7.2481	-0.27467	-0.54464	0.0576156	0.00090721	0.00264323
AP002954.3	antisense	0.9869	0.62904	1.26757	0.0654768	0.00090754	0.00264323
FTH1P2	processed_pseudogene	6.2731	0.71965	0.65862	0.00088388	0.00090763	0.00063988
CDC25B	protein_coding	5.0203	-0.27537	-0.88474	0.218175	0.00091111	0.00228985
TSR1	protein_coding	5.1489	-0.12014	-0.56471	0.411498	0.00091722	0.00186639
ZNF160	protein_coding	3.9591	0.59456	0.69328	0.00410967	0.00091741	0.00150056
SNX5	protein_coding	6.0757	-0.1785	-0.54945	0.207523	0.00091741	0.00233789
MPHOSPH10	protein_coding	6.4582	-0.18987	-0.5787	0.204909	0.00092152	0.00235725
ITPKC	protein_coding	2.3327	0.84548	0.87776	0.00195511	0.00092789	0.00106185
HMGB3	protein_coding	6.0232	-0.74012	-0.91399	0.00587954	0.00092789	0.00173202
RPF2P1	processed_pseudogene	2.7528	-0.24879	-0.81823	0.221898	0.00092789	0.00233072
TMX1	protein_coding	5.1735	-0.32838	-0.7175	0.0771855	0.00092789	0.00270145
TMEM217	protein_coding	1.1328	0.56985	1.10626	0.057068	0.00092789	0.00271203
NPR2	protein_coding	3.1595	0.95077	0.73063	0.00023642	0.00093701	0.00022636
PHIP	protein_coding	6.3925	0.00485	-0.57462	0.97871	0.00093965	0.00094442
LRRC40	protein_coding	4.3204	-0.15273	-0.64865	0.35568	0.00094025	0.00204001
CCT8P1	processed_pseudogene	5.5146	-0.39428	-0.63422	0.0237316	0.00094542	0.00254581
PLEKHG5	protein_coding	3.5132	0.50364	0.84453	0.0306769	0.00094542	0.00264323
RP3-326I13.1	lincRNA	-1.1682	5.24977	3.52359	8.18e-05	0.00095504	8.34e-05
RANBP1	protein_coding	4.8084	-0.82817	-0.81495	0.00141145	0.00095988	0.00090355
H3F3B	protein_coding	6.9129	-0.38484	-0.68211	0.038093	0.00095988	0.00272637
IFFO1	protein_coding	3.3153	0.33751	0.76583	0.0971293	0.00095988	0.0027306
MRPL13	protein_coding	5.4597	-0.39797	-0.57929	0.0147828	0.00096877	0.0023642
HSPA8	protein_coding	10.2066	-0.34571	-0.67921	0.0581954	0.0009704	0.00279518
RP1-273G13.2	processed_pseudogene	2.5212	-1.21645	-0.99189	0.00039312	0.0009751	0.00036465
BZW1	protein_coding	5.9643	-0.3057	-0.56372	0.0443258	0.00097644	0.00278828
XRCC5	protein_coding	8.71	-0.49341	-0.55029	0.00340536	0.00097867	0.00143408
MMP14	protein_coding	5.6668	0.44334	0.64836	0.0161535	0.00097867	0.00242613
RP11-570P14.1	processed_pseudogene	4.1409	-0.83356	-0.8551	0.00183362	0.00097933	0.00105291
PA2G4P1	processed_pseudogene	3.025	-0.37781	-0.70483	0.0424443	0.00097933	0.00279054
FTH1P8	processed_pseudogene	6.2361	0.71833	0.64041	0.00081194	0.00098799	0.00061601
SYPL1	protein_coding	5.928	-0.21146	-0.58394	0.163369	0.00098799	0.00264323
STK36	protein_coding	2.8741	0.79464	0.83712	0.00227578	0.00099105	0.0011789
PSMD14	protein_coding	6.8397	-0.48662	-0.61286	0.00729977	0.00099942	0.00196522
RP11-473M20.7	NA	0.0382	0.96567	1.55843	0.0287285	0.00100069	0.00273078
C7orf10	NA	1.6908	1.1371	1.2518	0.0032098	0.00101082	0.00140757
EIF5B	protein_coding	7.9672	-0.20758	-0.54957	0.151665	0.00101175	0.00272637
CCT5	protein_coding	8.1656	-0.55287	-0.67046	0.00596032	0.00101965	0.00184819
PGF	protein_coding	4.8071	0.56244	0.81791	0.0162157	0.00102231	0.00250612
CDC27	protein_coding	6.5334	-0.37865	-0.56392	0.0178683	0.0010224	0.00257187
MIR24-2	miRNA	3.3259	0.16872	0.8381	0.46483	0.00102507	0.00198993
CEP97	protein_coding	4.9858	-0.49565	-0.65013	0.00874156	0.00102507	0.00211704
PLA2R1	protein_coding	4.7139	0.28346	0.58999	0.0736519	0.00102531	0.00295712
SHC2	protein_coding	-0.1845	0.77692	1.6316	0.0847984	0.00102912	0.00295172
WDR45	protein_coding	2.5289	0.89086	0.86494	0.00137773	0.00103315	0.00091682
UAP1	protein_coding	6.6713	-0.53355	-0.66757	0.00718613	0.00103315	0.0020018
USP16	protein_coding	5.6659	-0.1568	-0.57827	0.299123	0.00103315	0.00238865
NLGN2	protein_coding	3.6944	0.20398	0.72699	0.294966	0.00103492	0.00240196
PODXL	protein_coding	9.2955	0.22385	0.53547	0.115768	0.00103567	0.00290491
CCDC136	protein_coding	1.2765	1.11746	1.14438	0.0019959	0.00104016	0.00113317
MLXIP	protein_coding	5.8398	0.43131	0.55691	0.00877209	0.00104382	0.00215647
ZBTB4	protein_coding	5.6493	0.34926	0.58467	0.0320243	0.00104382	0.00288733
SPC24	protein_coding	3.5878	-1.21676	-1.56811	0.00712562	0.00104969	0.00201866
C1orf110	protein_coding	1.6271	-1.16933	-0.89442	0.00027718	0.00105347	0.00027711
NRBP2	protein_coding	3.4545	-0.08993	0.76763	0.691374	0.00105347	0.00068614
UBN2	protein_coding	5.4963	0.59622	0.64289	0.00292227	0.00105347	0.00138405
NPAS2	protein_coding	5.4881	0.453	0.602	0.0103707	0.00105347	0.00228651
TMEM25	protein_coding	2.6216	0.48447	1.01756	0.0794749	0.00105347	0.00304109
COPS3	protein_coding	5.3692	-0.42245	-0.68381	0.0260604	0.00105657	0.00282814
HGSNAT	protein_coding	6.0676	0.0722	0.55265	0.6478	0.00106716	0.00171316
SCAMP5	protein_coding	1.0567	0.81613	1.13452	0.0134117	0.00106724	0.00248999
KCTD13	protein_coding	2.6198	0.7788	0.87958	0.00385485	0.00107124	0.00160736
NUP50	protein_coding	6.536	-0.44771	-0.66416	0.0180319	0.00107124	0.00269782
NUPL1	protein_coding	5.7507	-0.24517	-0.56664	0.101629	0.00107124	0.00305367
TRMU	protein_coding	4.1876	-0.46686	-0.73727	0.0222831	0.00107208	0.00279054
EXOSC10	protein_coding	6.1416	-0.2479	-0.5329	0.0817022	0.00107208	0.00309344
GRAMD4	protein_coding	1.0763	0.78553	1.07956	0.01274	0.00107785	0.0024745
SRP72	protein_coding	6.9722	-0.35633	-0.52618	0.0179869	0.00108123	0.00271258
KLHL4	protein_coding	5.1119	-0.71557	-0.62626	0.00075995	0.00108532	0.00061231
IGF2R	protein_coding	6.6236	0.55152	0.49238	0.00088936	0.00108884	0.00068891
TMEM60	protein_coding	3.8395	-0.42631	-0.64185	0.0179274	0.00108884	0.00272509
MAST4	protein_coding	7.0663	0.34224	0.55482	0.0286399	0.00108884	0.00296016
EFNB1	protein_coding	3.3917	0.94879	0.77297	0.00040565	0.00109081	0.00039298
SGK223	protein_coding	4.0939	0.7498	0.70217	0.00116901	0.00109139	0.00084546
VAT1	protein_coding	7.092	0.47623	0.52935	0.00368197	0.00109139	0.00160083
CTC-444N24.11	lincRNA	4.4527	0.29851	0.74198	0.134226	0.00109139	0.00302928
CLGN	protein_coding	0.9062	-1.35609	-1.4236	0.00202389	0.00109331	0.00117205
PTMA	protein_coding	8.3607	-0.50326	-0.66949	0.0108297	0.00109404	0.00239499
RUNDC3B	protein_coding	1.0333	-0.95723	-1.0993	0.0036792	0.0011075	0.00160841
PSMG3-AS1	lincRNA	0.7931	0.31753	1.28584	0.377824	0.0011101	0.00237765
USP20	protein_coding	2.2171	0.95484	0.8592	0.00088162	0.00111462	0.00068997
NRM	protein_coding	3.7203	-0.51355	-0.7594	0.0166103	0.00111669	0.00272637
PDE2A	protein_coding	2.4856	0.64523	0.97849	0.0214064	0.00112183	0.00288831
SNHG14	processed_transcript	6.1272	0.28755	0.58259	0.0699895	0.00112411	0.00325396
KIAA0020	protein_coding	5.4174	-0.37835	-0.56638	0.0188807	0.00112468	0.00281312
VBP1	protein_coding	4.7311	-0.38246	-0.61482	0.0258691	0.00113015	0.00301477
RPGR	protein_coding	5.219	-0.24611	-0.60182	0.121818	0.00113162	0.00318611
RN7SL648P	misc_RNA	3.4678	0.1878	0.81876	0.406123	0.0011355	0.0023642
LANCL2	protein_coding	4.5683	-0.38457	-0.62928	0.027969	0.0011355	0.00306719
PAPLN	protein_coding	1.8102	0.66773	0.90479	0.0122036	0.00113989	0.00255469
ARL10	protein_coding	4.4272	0.21629	0.58767	0.171535	0.00114012	0.00305244
ATG4C	protein_coding	2.4696	-0.51732	-0.90185	0.0343539	0.00114647	0.00318611
SVIP	protein_coding	4.7663	-0.67397	-0.63779	0.00130336	0.00115061	0.00093329
CDK2	protein_coding	3.7566	-0.70863	-0.74285	0.00243772	0.00115061	0.00133682
NOLC1	protein_coding	6.8675	-0.39034	-0.55155	0.0151823	0.00115061	0.00272637
LARP7	protein_coding	4.1902	-0.2351	-0.65319	0.167714	0.00115061	0.00309154
GPR153	protein_coding	-0.3205	0.66753	1.36977	0.0805551	0.00115381	0.00332559
PRKAB2	protein_coding	4.7855	0.72826	0.60426	0.00052241	0.00115608	0.00047871
ANK3	protein_coding	3.84	-0.44639	-0.62781	0.0134117	0.00115608	0.00266489
TIMP2	protein_coding	7.5215	-0.10747	0.49435	0.427956	0.0011563	0.00048057
TAF7L	protein_coding	1.9252	1.63456	1.05266	7.67e-05	0.00115783	8.13e-05
LCAT	protein_coding	1.8258	0.75921	1.04891	0.0138309	0.00115783	0.00269782
HMGN1	protein_coding	6.1842	-0.44198	-0.53508	0.00642115	0.00116148	0.00209756
DDB2	protein_coding	5.627	0.71788	0.57397	0.00040565	0.00116188	0.00040097
TTN	protein_coding	5.6282	0.38095	0.57115	0.0206732	0.00116188	0.00296883
LCLAT1	protein_coding	5.2141	-0.25142	-0.57717	0.101976	0.00116188	0.00332507
TUBB4B	protein_coding	6.9541	-0.73927	-0.95652	0.00973459	0.00116549	0.00242147
RP3-425P12.4	processed_pseudogene	2.3389	-0.49956	-0.87285	0.0346468	0.0011687	0.00325529
PAQR6	protein_coding	0.1045	1.19926	1.41468	0.00565402	0.00117232	0.00201285
SNRPGP2	processed_pseudogene	2.0474	-0.82363	-1.07568	0.00843628	0.00117232	0.00233072
TRAIP	protein_coding	1.4385	-0.07098	-1.3358	0.845982	0.00117399	0.00151863
CLN8	protein_coding	3.4154	0.60548	0.68287	0.00413869	0.00117606	0.00177484
SSB	protein_coding	5.505	-0.33295	-0.53915	0.028435	0.00117606	0.00319257
DDX1	protein_coding	7.5358	-0.29669	-0.5003	0.0353669	0.00117606	0.00329319
CTD-2089O24.1	NA	3.3607	-0.14486	-0.77131	0.480006	0.00118465	0.00230801
H1F0	protein_coding	4.5182	0.20841	-0.83592	0.335343	0.00118513	0.00040562
PLD3	protein_coding	4.6548	0.50915	0.73959	0.0179425	0.00119145	0.00294907
STK17B	protein_coding	3.657	-0.40924	-0.79299	0.054783	0.00119145	0.0034509
RP11-359M6.3	NA	1.8028	0.63093	0.90511	0.0169934	0.0011928	0.00291139
SLFN13	protein_coding	1.9196	-0.97691	-0.84909	0.00076103	0.00119305	0.0006412
SACS	protein_coding	8.6287	-0.30435	-0.50618	0.0340269	0.00119642	0.00331707
FTH1	protein_coding	4.5262	1.03779	0.72387	0.00014341	0.00119883	0.00016978
TXNIP	protein_coding	4.6676	0.86809	0.63388	0.00021943	0.00120006	0.00022636
ARNTL2	protein_coding	5.4978	-0.64335	-0.55388	0.00075995	0.00120006	0.0006412
ALPK3	protein_coding	5.3624	0.30255	0.58739	0.0628384	0.00120006	0.00350463
CSRP2	protein_coding	1.6409	-0.70107	-1.08438	0.0201314	0.00120565	0.00306372
FHL2	protein_coding	6.8029	0.99346	0.56414	4e-05	0.00121433	3.92e-05
RP11-359M6.1	lincRNA	1.5198	0.94289	1.20596	0.00954181	0.00121738	0.00249112
SERBP1P5	processed_pseudogene	5.1306	-0.58163	-0.73662	0.00845796	0.00122181	0.00240196
SMIM10	protein_coding	0.0041	-0.39144	-1.27861	0.209709	0.00123159	0.00319508
CTCF	protein_coding	5.6556	-0.20893	-0.5268	0.139451	0.00123159	0.00342931
CCDC14	protein_coding	6.1002	-0.33497	-0.55885	0.0339835	0.00123254	0.00341308
MARK4	protein_coding	3.703	0.49901	0.70846	0.0163473	0.00123438	0.00296226
C16orf59	protein_coding	0.1543	-0.78565	-1.42798	0.0337862	0.00123727	0.00342367
GDPD5	protein_coding	3.1069	0.26412	0.83861	0.251547	0.00123756	0.00307668
HMGN1P38	processed_pseudogene	2.4651	-0.31537	-0.83816	0.147038	0.00123756	0.00342931
MACF1	protein_coding	10.2915	0.08073	0.4731	0.547754	0.00123827	0.00225421
DDX39A	protein_coding	5.7083	-0.48057	-0.8848	0.0494678	0.00123841	0.00358142
HYLS1	protein_coding	3.5987	-0.55692	-0.83798	0.0194749	0.00125146	0.00313739
FKBP5	protein_coding	7.0456	-0.58944	-0.53829	0.00121047	0.00127148	0.00092352
RAN	protein_coding	8.3268	-0.62208	-0.73296	0.00608657	0.00127458	0.00219151
AL773572.7	NA	2.7683	0.49516	0.91361	0.0546504	0.00127458	0.0036833
TIMELESS	protein_coding	4.7097	-0.46913	-0.96337	0.0703592	0.00127458	0.0037019
NCBP1	protein_coding	6.4184	-0.4464	-0.52077	0.00565402	0.00127667	0.00211906
PPIG	protein_coding	6.1171	-0.19662	-0.62805	0.246001	0.00129399	0.00321696
SLBP	protein_coding	5.403	-0.50685	-0.58886	0.00539424	0.00129646	0.00209544
SMAGP	protein_coding	3.9846	-0.45515	-0.66803	0.017888	0.00129646	0.0031594
NFATC4	protein_coding	3.5686	0.49701	0.77077	0.026174	0.00129646	0.00341308
RP1-69D17.4	lincRNA	2.0693	-0.19661	0.93671	0.471333	0.00129656	0.00060001
MN1	protein_coding	0.7851	0.87066	1.19342	0.0146113	0.00129681	0.00298449
NPM1	protein_coding	9.2912	-0.47219	-0.71339	0.0231487	0.00129681	0.00332648
PAICS	protein_coding	7.846	-1.07872	-0.98242	0.00122099	0.00129733	0.00093598
OGT	protein_coding	6.9999	0.21236	0.4901	0.114818	0.00129733	0.00369808
TLL1	protein_coding	2.8501	0.9022	0.87922	0.00175898	0.00129763	0.00117496
TMEM97	protein_coding	5.1869	-0.99931	-0.65721	0.00011724	0.00130524	0.00013932
UMPS	protein_coding	5.0945	-0.49667	-0.72241	0.017888	0.00130626	0.00318611
SERBP1	protein_coding	8.4397	-0.46351	-0.56322	0.00756133	0.00130975	0.00241327
PIF1	protein_coding	2.562	-0.72283	-1.11512	0.0212067	0.00131121	0.00331032
ADAMTS18	protein_coding	4.4692	0.55768	0.67292	0.00706692	0.00131422	0.0023642
PRKY	transcribed_unprocessed_pseudogene	1.8365	0.43979	0.7362	0.036942	0.00132046	0.0036833
MAK16	protein_coding	5.006	-0.15258	-0.61651	0.359469	0.00132254	0.00293277
ASF1A	protein_coding	5.8078	-0.33015	-0.60263	0.0501611	0.00132254	0.00378623
APOBEC3B	protein_coding	1.8312	-0.58003	-1.31793	0.0846713	0.00132254	0.00383632
MRPL3P1	processed_pseudogene	3.6008	-0.46379	-0.65565	0.0151823	0.0013273	0.0030798
GCSHP5	processed_pseudogene	2.3029	-0.69057	-0.76434	0.00371042	0.00132883	0.00182095
COQ2	protein_coding	3.9743	-0.54355	-0.76699	0.0151658	0.00132953	0.00309107
ZNF506	protein_coding	2.8403	0.5975	0.90323	0.0238714	0.00132953	0.00344761
ZW10	protein_coding	4.3645	-0.40795	-0.64979	0.0273902	0.00132953	0.0035405
RIF1	protein_coding	6.3662	-0.24134	-0.59697	0.138712	0.00132953	0.00373264
MTHFR	protein_coding	2.9141	0.61252	0.7874	0.0103594	0.00133354	0.00273078
TNFRSF25	protein_coding	1.7185	0.67794	1.28238	0.0631161	0.00133354	0.00386168
ADAM19	protein_coding	3.0917	-0.30019	0.72421	0.143986	0.00133729	0.00024145
PRMT3	protein_coding	4.3033	-0.25477	-0.69328	0.168621	0.00135118	0.00368616
HK2	protein_coding	4.298	-0.29086	-0.66351	0.103986	0.0013545	0.00388085
MGRN1	protein_coding	4.6157	0.56812	0.62181	0.00396483	0.00136482	0.0019066
CHCHD3P3	processed_pseudogene	2.2996	-0.60893	-0.7598	0.00774791	0.00136482	0.00250241
TSGA10	protein_coding	1.2851	0.66125	1.09126	0.0364996	0.00136482	0.0037851
LMBR1L	protein_coding	3.2777	0.38792	0.73085	0.0604859	0.00136482	0.00393565
AC005795.1	processed_pseudogene	5.7867	-0.57725	-0.54792	0.00162517	0.00136565	0.00115627
MBOAT1	protein_coding	2.1286	-0.8963	-1.09598	0.00671014	0.00136565	0.00239155
SDC3	protein_coding	3.9469	0.32606	0.66717	0.0805551	0.00136565	0.00395761
C12orf75	protein_coding	4.853	-0.83232	-0.6885	0.00065113	0.00137717	0.0006065
SVIL	protein_coding	5.8934	0.35578	0.49626	0.0163473	0.00138421	0.00325396
RP1-283E3.4	transcribed_processed_pseudogene	3.4809	0.69602	0.82288	0.00650927	0.00138635	0.00238578
SUZ12	protein_coding	5.0671	-0.2177	-0.64578	0.212005	0.00138778	0.00363967
RPL39L	protein_coding	2.7569	-0.8099	-1.20808	0.0190052	0.00139806	0.00341308
TUBA4A	protein_coding	3.6762	-0.84179	-0.71922	0.00081194	0.00140184	0.00070767
NUP188	protein_coding	6.3	-0.38543	-0.48146	0.00921095	0.00140392	0.00272637
RRP15	protein_coding	5.9105	-0.34287	-0.568	0.0353274	0.00140392	0.00384969
CPT1C	protein_coding	3.1541	0.34027	0.7732	0.115519	0.00140392	0.00398953
ATP13A1	protein_coding	3.7264	0.65386	0.66574	0.00256938	0.0014057	0.00153027
CA8	protein_coding	1.0595	-0.82845	-1.08956	0.00882546	0.0014057	0.00270167
STAT2	protein_coding	4.5499	0.30071	0.57701	0.0650523	0.0014057	0.00405716
RP11-297L17.6	processed_pseudogene	6.2106	-0.57371	-0.50779	0.00106381	0.00140786	0.00090265
AMT	protein_coding	1.5551	0.46968	0.95578	0.0824096	0.00140786	0.00407443
ARL6IP6	protein_coding	4.0203	-0.81756	-0.77693	0.00162517	0.00140819	0.00116612
TSKU	protein_coding	2.9632	0.72242	0.80674	0.00461389	0.00140819	0.00208293
EIF2S2P4	processed_pseudogene	5.9761	-0.20529	-0.52512	0.154368	0.00140819	0.00388555
COL27A1	protein_coding	4.3656	0.40888	0.76708	0.0607132	0.00140878	0.00407256
EIF5	protein_coding	7.238	-0.22549	-0.54267	0.13373	0.00141826	0.00398953
TP53TG1	lincRNA	1.9141	-0.0076	1.00449	0.98299	0.00142509	0.00146805
NUDT15	protein_coding	3.964	-0.99667	-0.98504	0.00207898	0.00143006	0.00138005
EIF1AX	protein_coding	5.8976	-0.37456	-0.65147	0.0435778	0.00143379	0.00403052
LPXN	protein_coding	2.6413	1.09277	0.87203	0.00045516	0.00143454	0.00047114
GOLGA8A	protein_coding	4.74	0.43455	0.55494	0.0106118	0.00143912	0.00292357
RP11-17G12.2	antisense	-0.6316	1.26605	1.6766	0.0134021	0.00144024	0.00318611
GPATCH4	protein_coding	5.782	-0.19885	-0.55414	0.191934	0.00144029	0.00384969
RP11-114F10.3	antisense	1.47	0.80245	1.25136	0.0297641	0.00144029	0.00384969
CBR3	protein_coding	0.4101	-0.94032	-1.10825	0.00533259	0.00144553	0.00224278
MBD4	protein_coding	5.3661	-0.29294	-0.53473	0.0523784	0.00144553	0.00413607
PIGZ	protein_coding	1.8194	0.45977	1.1346	0.152469	0.00144778	0.0040176
CTC-484P3.1	NA	1.5314	0.57971	0.91912	0.0315816	0.00144789	0.00390005
HSPA8P9	processed_pseudogene	2.4006	-0.36741	-0.76744	0.0771046	0.0014484	0.00421221
ATP6AP1	protein_coding	5.8859	0.26414	0.56612	0.0967336	0.00145539	0.00421221
ZNF425	protein_coding	-0.6099	1.36898	1.6643	0.00833662	0.00145629	0.00271369
AC004797.1	NA	4.5825	-0.44773	-0.70614	0.0279061	0.00145972	0.00384969
ZNF596	protein_coding	0.7566	0.62064	1.12435	0.0558897	0.00145976	0.00421221
USP13	protein_coding	5.7207	-0.31507	-0.53731	0.0408181	0.0014645	0.00408571
PSMD1	protein_coding	8.0485	-0.44274	-0.51083	0.00610637	0.00147005	0.00241607
ING3	protein_coding	3.4865	-0.49781	-0.77885	0.0263027	0.00147005	0.00383996
ANP32BP1	transcribed_processed_pseudogene	4.4309	-0.41265	-0.64666	0.0272862	0.00147005	0.00385465
SPAG1	protein_coding	3.056	-0.6262	-0.68739	0.00403102	0.0014716	0.00201866
ODC1	protein_coding	8.2524	-0.34607	-0.6179	0.0511428	0.00147171	0.00421221
TOE1	protein_coding	2.6174	-0.54776	-0.74481	0.013182	0.00147616	0.00323074
NUDCD1	protein_coding	5.1104	-0.47376	-0.62822	0.0126072	0.00148623	0.00319509
HBS1L	protein_coding	6.24	-0.31229	-0.53149	0.041847	0.00148623	0.00416767
CDC5L	protein_coding	6.4152	-0.23877	-0.56777	0.130643	0.00148623	0.00421221
TMEM38B	protein_coding	3.2671	-0.21138	-0.7295	0.28301	0.00149937	0.0036833
ING2	protein_coding	1.6627	-0.63737	-0.88401	0.0136651	0.0015026	0.00330621
TCOF1	protein_coding	4.6648	-0.19015	-0.62183	0.262268	0.00150286	0.00376553
AAAS	protein_coding	5.1697	-0.2677	-0.69111	0.15821	0.00151598	0.00419623
PPATP1	processed_pseudogene	1.1643	-0.79744	-1.05846	0.0106317	0.00151788	0.00305423
ICAM1	protein_coding	1.6981	0.91019	1.18948	0.0127444	0.00151866	0.00325396
ADAM12	protein_coding	1.023	0.46203	1.15785	0.162173	0.00152506	0.0042094
UBA2	protein_coding	5.5669	-0.38592	-0.60947	0.0300492	0.00153223	0.0040553
CEP57L1	protein_coding	3.2385	-0.49432	-0.6859	0.0154355	0.00153303	0.00348764
NCKAP5L	protein_coding	2.8783	0.60652	0.88018	0.0215512	0.00153469	0.00381133
SAMD14	protein_coding	-0.1488	1.07282	1.50096	0.0187942	0.00153844	0.00369758
BAZ2A	protein_coding	6.4264	0.39754	0.47429	0.00782969	0.00154461	0.00273338
KCNJ2	protein_coding	3.9987	0.52465	0.69368	0.0134117	0.00155729	0.00337083
IDS	protein_coding	6.1968	0.21467	0.50549	0.131643	0.00155729	0.00440032
RP11-553A10.1	lincRNA	0.7152	1.18832	1.34928	0.00587954	0.0015693	0.00246619
NPM1P9	processed_pseudogene	-0.4046	-0.69081	-1.64507	0.0987453	0.00157633	0.00451267
PI4K2B	protein_coding	4.3324	-0.65393	-0.68828	0.00338418	0.00158295	0.00191684
NXT1	protein_coding	2.8324	-0.66021	-0.75485	0.00544836	0.00158295	0.00240196
ZSCAN30	protein_coding	3.8037	0.11129	0.67457	0.581097	0.00158295	0.00282325
TMC7	protein_coding	2.4851	0.75125	0.95062	0.0109678	0.00158295	0.00318611
C14orf80	protein_coding	0.8448	-0.81979	-1.24891	0.0196376	0.00158295	0.0038141
NBN	protein_coding	5.5483	-0.22796	-0.58263	0.158346	0.00158295	0.00437049
ATL2	protein_coding	4.7798	-0.39252	-0.68074	0.043993	0.00158295	0.00441963
C2CD5	protein_coding	4.97	-0.30699	-0.53447	0.0453402	0.00158295	0.00442831
CCT6P2	processed_pseudogene	4.1156	-0.62845	-0.67333	0.0037436	0.00158904	0.00203189
CYB5D2	protein_coding	2.8182	0.24557	0.79714	0.281048	0.0015989	0.00390584
PKMYT1	protein_coding	0.4033	-0.42002	-1.28852	0.199457	0.00160225	0.00425683
WBP4	protein_coding	3.8631	-0.27474	-0.66865	0.13373	0.00160274	0.00450333
SLC9A1	protein_coding	5.4742	1.0519	0.70387	0.00014863	0.00160413	0.00018557
STIP1	protein_coding	6.4584	-0.2495	-0.48894	0.0741238	0.00160881	0.00465261
MEGF8	protein_coding	4.9906	-0.07371	0.58464	0.683393	0.00161532	0.00106627
HAUS6P1	processed_pseudogene	2.8923	-0.3538	-0.9195	0.154268	0.00161532	0.00446984
NPEPL1	protein_coding	1.6487	0.34668	1.02813	0.240745	0.00161596	0.00412076
PDLIM7	protein_coding	5.1637	0.41188	0.58128	0.0193879	0.00162224	0.00386168
CTC-241N9.1	lincRNA	-0.9124	1.48454	1.87601	0.0115499	0.00163229	0.00330621
MT-RNR2	Mt_rRNA	18.2819	-0.78712	-0.58461	0.00036399	0.00163362	0.00040097
MAP3K10	protein_coding	-0.0909	1.26984	1.56303	0.0099642	0.00163362	0.00313764
H1FX	protein_coding	2.3321	-0.33487	-0.99266	0.207523	0.00163362	0.00430791
CHEK2	protein_coding	3.3186	-0.58111	-0.82281	0.0175861	0.00163446	0.00380221
RPP30	protein_coding	4.5963	-0.42604	-0.58477	0.0158509	0.00163625	0.00369758
CBX3P9	processed_pseudogene	3.2639	-0.59931	-0.69613	0.00619771	0.00164919	0.00261855
MINK1	protein_coding	3.9119	0.55686	0.66613	0.00818841	0.00165527	0.00292384
CDC123	protein_coding	6.6672	-0.23931	-0.47514	0.0787262	0.00166233	0.00479331
GS1-124K5.11	lincRNA	2.3289	0.64707	0.84914	0.0136628	0.00166404	0.00357591
IGF1R	protein_coding	5.9291	0.29831	0.53006	0.0537393	0.00166655	0.00473075
SNAI1	protein_coding	2.6085	0.91499	0.92682	0.00292227	0.0016702	0.00180928
MAPK11	protein_coding	2.0596	0.38238	0.84512	0.115357	0.00167928	0.00478345
UBE2CP3	processed_pseudogene	1.1619	0.39551	0.94306	0.14648	0.00168942	0.00470729
CCT6A	protein_coding	8.2563	-0.41076	-0.5458	0.0149934	0.00171342	0.00374579
PTPRE	protein_coding	6.6908	0.41951	0.48304	0.00685315	0.00171522	0.00277688
CNTNAP1	protein_coding	2.9495	0.31432	0.68907	0.112982	0.00171522	0.00487575
GMEB1	protein_coding	4.3821	-0.2575	-0.55762	0.0995238	0.00172763	0.00494956
ZNF423	protein_coding	0.845	0.67205	1.00998	0.0275404	0.00173284	0.00441316
PNRC2	protein_coding	5.1003	-0.33529	-0.56946	0.0433413	0.00173284	0.00476203
HNRNPA2B1	protein_coding	10.0801	-0.60155	-0.60121	0.00294425	0.0017419	0.00184563
CTD-2510F5.2	NA	-0.628	-0.64588	-1.54201	0.109488	0.00175752	0.004998
VAMP1	protein_coding	1.4965	0.63976	0.87267	0.0172487	0.00176067	0.00396456
RP3-368A4.6	sense_intronic	3.5756	0.65597	0.94433	0.0224793	0.00176067	0.00426157
SEMA3A	protein_coding	1.1489	-0.6801	-1.09153	0.0261389	0.00176499	0.00441963
PPP1CC	protein_coding	7.7319	-0.35475	-0.56158	0.0346468	0.00176499	0.00467361
RP11-267J23.4	processed_pseudogene	0.2435	-0.91055	-1.39509	0.0228192	0.00176705	0.00428799
YES1	protein_coding	7.5143	-0.47562	-0.61557	0.0133156	0.00176737	0.00369101
CEP57L1P1	processed_pseudogene	0.6551	-0.57321	-1.09556	0.0558897	0.00176737	0.00499379
ILF2	protein_coding	7.5872	-0.52403	-0.58855	0.00606089	0.00176754	0.00269782
TMSB15A	protein_coding	-0.4106	-1.17002	-1.75917	0.0210587	0.00177136	0.00421221
WDR12	protein_coding	5.1035	-0.32486	-0.59881	0.0596005	0.00177157	0.00502703
ERI1	protein_coding	5.2956	-0.33273	-0.6292	0.0655484	0.00177871	0.00506911
ELMO1	protein_coding	4.5071	0.39428	0.54548	0.0185077	0.00177932	0.00408435
GXYLT1	protein_coding	5.1684	-0.30726	-0.56455	0.0590219	0.00178346	0.0050571
RRS1	protein_coding	2.322	-0.24825	-0.79314	0.250552	0.00178737	0.00449811
ARMC9	protein_coding	3.8579	0.37845	0.64099	0.0462011	0.00178737	0.00495172
CTC-479C5.16	NA	1.3836	0.51481	1.00803	0.0813873	0.00179509	0.00513697
PA2G4P2	processed_pseudogene	2.3291	-0.37092	-0.75814	0.0795824	0.00179691	0.00514126
RP11-310J24.3	sense_intronic	-0.0948	1.45298	1.60578	0.00542379	0.00179992	0.00258713
CRIPAK	protein_coding	2.9856	0.64001	0.83133	0.0136548	0.00180167	0.00377681
SLC25A40	protein_coding	3.5327	-0.53412	-0.80654	0.025788	0.00181296	0.00449811
FABP5P7	processed_pseudogene	3.0578	-0.79138	-0.67911	0.00104496	0.00181382	0.00096916
MCMBP	protein_coding	5.6878	-0.44242	-0.57072	0.0128717	0.00181382	0.00371336
VTA1	protein_coding	5.251	-0.31521	-0.58703	0.0630405	0.00181635	0.00515004
ABCD1	protein_coding	1.0982	0.84032	1.0147	0.00941097	0.00181684	0.00329455
AC005154.6	processed_transcript	4.106	0.29647	0.61411	0.0961413	0.00182373	0.00520823
RGS12	protein_coding	4.097	0.49597	0.5783	0.00759949	0.00182681	0.00302904
CLHC1	protein_coding	2.2064	0.38499	0.87806	0.131088	0.00183577	0.00515027
C1RL	protein_coding	2.6829	0.59185	0.8921	0.0290851	0.00184008	0.00469385
SH3PXD2A	protein_coding	4.0855	0.35942	0.58354	0.0396586	0.00185708	0.00500515
KDR	protein_coding	7.662	0.18882	0.48304	0.174785	0.00186402	0.00506104
C12orf63	NA	3.8431	0.03243	0.85158	0.909965	0.00187088	0.00226775
SNX29	protein_coding	4.7458	0.60896	0.60166	0.00278368	0.00187741	0.00185957
AC018720.10	NA	1.7151	0.76153	0.97198	0.0128915	0.00187794	0.00380056
ABHD10	protein_coding	5.277	-0.53969	-0.65029	0.00909089	0.00187804	0.00331613
ATP7B	protein_coding	2.3516	0.22456	0.81719	0.349525	0.00187804	0.00428799
UPF2	protein_coding	5.7744	-0.19942	-0.48293	0.148167	0.00187804	0.00519931
LYPD6	protein_coding	2.137	-0.58837	-1.1216	0.0591435	0.00187804	0.00527195
FLNC	protein_coding	6.9339	0.6122	0.59347	0.00257782	0.00188526	0.00178805
PSRC1	protein_coding	1.9327	-1.22779	-1.70513	0.0146113	0.001889	0.0039762
AGRN	protein_coding	2.9653	0.25815	0.90407	0.332921	0.0019034	0.00441963
ZNF493	protein_coding	1.9911	0.62954	0.9683	0.0327113	0.00190579	0.00494956
UPF3B	protein_coding	4.0359	-0.36796	-0.70685	0.0689315	0.00190805	0.0054082
GRN	protein_coding	6.1397	0.4078	0.67615	0.0445754	0.00192609	0.00521937
LEO1	protein_coding	6.5195	-0.24341	-0.52299	0.108385	0.00192812	0.00544306
FAM227A	protein_coding	1.0678	1.03816	1.27393	0.0108694	0.00193692	0.00365525
USP35	protein_coding	1.5849	0.64032	0.95461	0.0288191	0.00193692	0.00487449
RAB23	protein_coding	4.5049	-0.27939	-0.62014	0.112982	0.00195497	0.00550429
GNPNAT1	protein_coding	4.3704	-0.55194	-0.59483	0.00475818	0.00196315	0.00254581
RP11-395L14.17	processed_pseudogene	2.7264	-0.59977	-0.89636	0.0246683	0.00197214	0.00476203
RP11-894P9.1	antisense	2.246	0.43653	0.95509	0.120375	0.00197214	0.00551834
C1orf100	protein_coding	0.5842	0.3026	1.2297	0.415953	0.00197959	0.00421221
TMEM35	protein_coding	2.091	0.22996	0.83099	0.351109	0.00200273	0.00452291
ZNF662	protein_coding	0.0607	1.27094	1.48365	0.00830066	0.00201047	0.00331613
SLCO4A1	protein_coding	0.6693	-0.36794	-1.10322	0.209224	0.00201182	0.00523921
AL133216.1	NA	0.5283	0.68986	1.11514	0.0424236	0.00201243	0.00536687
NR2C2AP	protein_coding	1.6377	-0.5536	-1.13195	0.0763851	0.00201243	0.00565238
SERTAD4	protein_coding	2.4965	-1.16253	-1.09485	0.00211711	0.00202348	0.00164335
DKK1	protein_coding	6.4369	0.00697	-0.53005	0.969533	0.00202348	0.00205587
FAM136A	protein_coding	6.0702	-0.65855	-0.65825	0.00325886	0.00202348	0.00210931
WDR11-AS1	antisense	0.9114	0.06365	1.02093	0.857357	0.00202348	0.00264323
MYO1F	protein_coding	-0.9048	1.33007	1.60395	0.0103594	0.00202348	0.00368177
TTC26	protein_coding	2.9282	-0.20307	-0.73222	0.323349	0.00202348	0.00474487
RP11-446E9.1	processed_pseudogene	3.9862	-0.38814	-0.67	0.0484147	0.00202348	0.00550407
RP11-350G24.2	unprocessed_pseudogene	2.4229	-0.14661	-0.72904	0.482923	0.00202753	0.00404362
C12orf55	NA	4.126	0.10811	0.73252	0.639893	0.00203332	0.00344613
NME3	protein_coding	1.8313	0.26541	0.9144	0.331204	0.0020587	0.00477453
NSUN5P1	transcribed_unprocessed_pseudogene	2.5222	0.29201	0.74106	0.179933	0.0020587	0.00551248
ZNF320	protein_coding	3.2131	0.27842	0.76568	0.216321	0.00206163	0.00534921
POFUT2	protein_coding	3.2022	0.20894	0.63257	0.26111	0.00207505	0.00515044
GSTCD	protein_coding	3.5465	-0.57176	-0.76711	0.0161256	0.00208611	0.00440032
SPATA7	protein_coding	3.1706	0.85889	0.76525	0.00149814	0.00208858	0.00131131
LINC00705	lincRNA	3.2781	0.24655	0.73471	0.25417	0.00209268	0.00522638
MYL5	protein_coding	0.3143	0.7613	1.24416	0.0459475	0.00209268	0.0056043
METAP1	protein_coding	5.7028	-0.31099	-0.48745	0.0354367	0.0021059	0.0054082
RP11-231C14.4	protein_coding	3.2827	0.59841	0.82511	0.0206732	0.00210624	0.00477212
SLC43A3	protein_coding	4.2884	-0.42295	-0.69048	0.0399434	0.00210624	0.00551834
MIR31HG	sense_overlapping	0.6222	0.31787	1.02135	0.300672	0.00212386	0.00507206
BANF1	protein_coding	5.0928	-0.43049	-0.51281	0.00938385	0.00212567	0.00364897
ATG16L2	protein_coding	3.1877	0.52691	0.69932	0.0169934	0.00212638	0.00451838
CTB-113P19.1	antisense	3.1563	0.22946	0.75047	0.302626	0.00212764	0.00507375
IL18BP	protein_coding	3.6106	0.50461	0.64174	0.0136901	0.0021284	0.00421221
ROBO3	protein_coding	2.5918	0.66471	0.78671	0.00937497	0.00213641	0.00365744
RASD1	protein_coding	3.1359	0.33802	0.88598	0.197039	0.00213641	0.00562947
GLIPR2	protein_coding	3.7774	-0.03102	0.55773	0.869259	0.00213883	0.00186136
GNL2	protein_coding	6.0091	-0.21595	-0.52334	0.156826	0.00213883	0.00580807
TTC27	protein_coding	4.9918	-0.24209	-0.51461	0.105412	0.00213913	0.00596844
ALCAM	protein_coding	7.6747	-0.61301	-0.53962	0.00154113	0.00214481	0.00135458
MXD1	protein_coding	4.8827	0.73981	0.52703	0.00032465	0.00216354	0.00038574
NRG1	protein_coding	6.4999	0.79553	0.48761	0.00011358	0.00217714	0.0001452
ZER1	protein_coding	3.9772	0.76073	0.66013	0.00130696	0.00217837	0.00120691
OTUD6B	protein_coding	4.1536	0.02029	-0.6374	0.921967	0.00218877	0.00206487
FBL	protein_coding	7.0346	-0.6024	-0.77957	0.0155238	0.00219729	0.00448428
NUP37	protein_coding	4.3089	-0.52973	-0.71973	0.0180319	0.00220352	0.00474487
F11R	protein_coding	5.9823	0.2081	0.73498	0.340455	0.00221014	0.00507206
GNL3	protein_coding	6.9281	-0.29667	-0.52255	0.0595188	0.00221559	0.00603043
FOXN2	protein_coding	5.304	-0.30855	-0.58556	0.0739894	0.002216	0.00611398
ANKZF1	protein_coding	3.2593	0.7967	0.79736	0.00339113	0.00222038	0.00227136
XRCC6P2	processed_pseudogene	4.809	-0.43815	-0.62657	0.0238382	0.00223258	0.00517497
TXNDC12	protein_coding	5.4246	-0.27936	-0.47395	0.0503427	0.00223258	0.00596219
ADCY6	protein_coding	3.0599	0.24455	0.6637	0.214649	0.00223412	0.00577084
ATP5G1	protein_coding	5.1538	-0.8612	-0.51139	9.95e-05	0.00223779	0.00011832
PPIAP22	processed_pseudogene	7.1043	-0.73062	-0.62512	0.00132516	0.00223937	0.00122524
ARHGAP21	protein_coding	7.7336	0.51507	0.47829	0.00225597	0.0022457	0.00179247
AUNIP	protein_coding	1.5686	-0.66756	-1.11671	0.0399809	0.0022457	0.00580807
RP1-159M24.1	processed_pseudogene	2.8006	-0.42953	-0.62898	0.0254011	0.00224797	0.00528815
KRR1	protein_coding	4.5961	-0.14087	-0.62257	0.440608	0.00225064	0.00469385
LIN52	protein_coding	3.076	-0.4326	-0.72478	0.0449742	0.00225064	0.00593416
ZNF790	protein_coding	2.0649	0.3597	0.82088	0.14228	0.00225064	0.00613849
RP11-439E19.8	NA	0.5482	0.59649	1.18055	0.0954435	0.00225064	0.0062746
CTD-2228K2.7	processed_transcript	0.3301	0.54617	1.24521	0.146932	0.00227258	0.00617097
SRPX2	protein_coding	5.6555	-0.06657	0.54127	0.704863	0.00227301	0.00152395
TYW3	protein_coding	5.2183	-0.18962	-0.59493	0.272817	0.00227312	0.00559036
RAB8B	protein_coding	5.8863	-0.29204	-0.48364	0.0468903	0.00227312	0.00601514
ZNF623	protein_coding	4.3703	0.42675	0.54048	0.0140806	0.00228351	0.00446854
DDX12P	unprocessed_pseudogene	1.8569	-0.16575	-0.90752	0.525323	0.00229384	0.00440032
BUD13	protein_coding	4.0092	-0.63199	-0.66357	0.00461182	0.00229969	0.00272776
STXBP5L	protein_coding	0.2829	-0.10038	-1.29249	0.795722	0.00229969	0.00325537
RP11-497D6.2	NA	1.9066	-0.50853	-0.87765	0.047759	0.00229969	0.00606323
PPARA	protein_coding	2.3519	0.33139	0.93677	0.238521	0.0023008	0.00583197
PBXIP1	protein_coding	3.3826	0.37482	0.75441	0.0980134	0.0023008	0.00640955
RP6-159A1.2	processed_pseudogene	0.0497	-0.65404	-1.18284	0.0509461	0.00230405	0.00613849
EPS8L2	protein_coding	-0.4699	1.56037	1.60276	0.00418878	0.00231151	0.00261855
RP11-290H9.4	NA	0.4369	0.42369	1.09246	0.200922	0.00233541	0.00607768
IARS	protein_coding	7.8075	-0.1262	-0.4993	0.401623	0.00233802	0.00507206
ERRFI1	protein_coding	5.4937	-0.33813	-0.51976	0.034846	0.00234764	0.00587623
DKFZP761J1410	NA	1.9113	0.54021	0.85051	0.0406775	0.00234764	0.00603043
IER3IP1	protein_coding	4.2608	-0.61224	-0.64098	0.00467197	0.00235216	0.00277886
ITGB3BP	protein_coding	2.9467	-0.30049	-0.75511	0.165846	0.00235216	0.00634094
STRA13	protein_coding	3.2919	-0.77008	-0.7184	0.00225159	0.00235795	0.00182866
SGIP1	protein_coding	4.2403	-0.04302	0.6255	0.840698	0.00235795	0.00196522
BCORL1	protein_coding	3.4196	0.51558	0.63881	0.0128717	0.00235795	0.00441963
C9orf40	protein_coding	1.7717	-0.77253	-1.13392	0.0238227	0.00235795	0.0054082
ORC3	protein_coding	4.2695	-0.29677	-0.61126	0.0975235	0.00235795	0.00657494
HSPA9	protein_coding	7.7963	0.07261	-0.54083	0.676377	0.00236051	0.00151863
IGF2	protein_coding	1.2786	0.11067	1.08502	0.762443	0.00236051	0.0035038
LINC00205	lincRNA	3.2985	0.70261	0.99384	0.0253993	0.00236051	0.00551248
PPT1	protein_coding	6.1953	-0.25576	-0.48867	0.0808734	0.00236051	0.00657511
UBE2H	protein_coding	7.7056	0.45505	0.43228	0.00279066	0.00236053	0.00207932
CERCAM	protein_coding	3.853	0.19374	0.64735	0.320809	0.00236881	0.00559036
PPIAP29	processed_pseudogene	3.7406	-0.61579	-0.67372	0.00606852	0.00237588	0.00321034
ENPP1	protein_coding	2.8985	-0.81797	-0.71014	0.00147837	0.00238191	0.00136303
ZNF418	protein_coding	0.7462	0.98521	1.10232	0.00740949	0.00238191	0.0035405
TDP1	protein_coding	4.7165	-0.47254	-0.69041	0.0274132	0.00238191	0.00566128
IFT27	protein_coding	3.6385	0.20662	0.60663	0.255617	0.00238191	0.00596219
FAM210B	protein_coding	5.8733	0.17525	0.49829	0.239156	0.00238191	0.00604504
ELP4	protein_coding	3.7782	-0.21524	-0.62551	0.234184	0.00238191	0.00605826
PLEKHM1	protein_coding	3.2802	0.74006	0.72433	0.00323803	0.00238495	0.00226836
CROCCP3	transcribed_unprocessed_pseudogene	1.4454	0.51594	0.999	0.0901456	0.00238495	0.00669615
ARHGAP18	protein_coding	6.8793	-0.55423	-0.49593	0.00192105	0.00239938	0.0016443
KIF26B	protein_coding	0.4094	1.16165	1.31173	0.00795878	0.00239938	0.00367744
PRKACB	protein_coding	6.5463	-0.46555	-0.52873	0.00833662	0.00239938	0.00375442
MB21D1	protein_coding	2.1772	-0.55548	-0.81562	0.0262142	0.00239938	0.00564547
CIRH1A	protein_coding	5.5122	-0.1438	-0.48018	0.311524	0.00239938	0.00572647
SPOCD1	protein_coding	4.9403	0.28477	0.52728	0.0750393	0.00240636	0.00670745
CENPH	protein_coding	3	-0.75254	-1.13504	0.0299156	0.00241663	0.00585532
RP11-26H16.1	processed_pseudogene	1.4352	-0.06643	0.96723	0.84668	0.00241817	0.00204672
LMLN	protein_coding	3.6532	0.27996	0.58494	0.111901	0.00241994	0.00676106
PLP2	protein_coding	6.3118	-0.32138	-0.53393	0.0503845	0.00242142	0.00646951
HN1L	protein_coding	5.7779	-0.57499	-0.57852	0.00394281	0.00242533	0.00260725
EFCAB13	protein_coding	2.1652	0.6996	0.88936	0.0152156	0.00242533	0.00483823
RHBDL2	protein_coding	0.4293	0.89655	1.15541	0.0166044	0.00242533	0.004998
BBC3	protein_coding	-0.2254	1.30253	1.34719	0.00461744	0.00243419	0.00282814
MANBA	protein_coding	3.808	0.23227	0.6476	0.233112	0.00243419	0.00624079
COL4A1	protein_coding	7.8806	-0.17358	0.44364	0.192371	0.00244332	0.00051832
PIGA	protein_coding	2.796	-0.19269	-0.7786	0.393608	0.00244332	0.0054082
NFKBIZ	protein_coding	4.9609	0.3331	0.55315	0.0511428	0.00244332	0.00654939
DYRK1B	protein_coding	1.6376	0.67343	0.92837	0.0231602	0.00244372	0.00555331
GCNT1	protein_coding	3.6007	-0.74455	-0.68582	0.00218706	0.0024461	0.00183197
SNRPB2	protein_coding	4.8678	-0.32529	-0.52244	0.0424236	0.0024461	0.00636906
SIN3B	protein_coding	4.3528	0.48269	0.56554	0.0100501	0.0024538	0.00411549
TNK2	protein_coding	2.4915	0.4543	0.95836	0.118686	0.0024538	0.00683875
ECI2	protein_coding	5.7235	-0.93169	-0.60918	0.00023216	0.00245573	0.00027413
HADH	protein_coding	4.0355	-0.52415	-0.64553	0.0122204	0.00245573	0.0044834
HSPA8P1	processed_pseudogene	3.6703	-0.50247	-0.74868	0.0297442	0.00245573	0.00593416
CTD-3074O7.12	NA	2.2816	0.32674	0.84652	0.202362	0.00245896	0.00651729
RP11-142L4.2	processed_pseudogene	2.5364	-0.42272	-0.72998	0.0528414	0.00246377	0.00666354
TRIO	protein_coding	8.132	0.49792	0.4859	0.00343464	0.00247543	0.00243494
CCDC152	protein_coding	0.573	-0.5334	-1.11296	0.0884361	0.00247986	0.00693833
SLC35E2B	protein_coding	4.775	0.41181	0.54089	0.018201	0.00248048	0.00523264
GABPB1	protein_coding	4.9144	-0.3635	-0.58795	0.0439349	0.00248759	0.00650129
MSRB2	protein_coding	2.2701	0.06599	0.7552	0.800648	0.00248794	0.00358147
SLC16A2	protein_coding	1.5958	0.38934	0.9194	0.163916	0.00249181	0.00679745
PCDH18	protein_coding	1.3003	-1.15338	-1.11472	0.00292227	0.00249525	0.00220415
RNF26	protein_coding	3.3601	-0.22138	-0.66624	0.251924	0.00249966	0.00634433
LAMA2	protein_coding	3.0838	-0.22162	0.83126	0.394186	0.00250391	0.00097956
DCHS1	protein_coding	4.8401	0.03111	0.52204	0.863058	0.00250505	0.00330621
PALM	protein_coding	1.1465	0.4541	0.89965	0.0989137	0.00250861	0.00701573
PML	protein_coding	5.0007	0.45378	0.54122	0.0113566	0.00252554	0.00442831
PLSCR1	protein_coding	4.167	-0.22894	-0.69044	0.256065	0.00253104	0.00639459
BPHL	protein_coding	2.0708	0.31772	0.7575	0.167066	0.00253337	0.00688802
CLIP2	protein_coding	3.4787	0.34945	0.64142	0.0752749	0.00253337	0.00701573
TGFB1	protein_coding	4.8278	0.43954	0.66769	0.0365739	0.00254431	0.00640955
ALS2CL	protein_coding	1.8976	0.87494	0.85841	0.00341899	0.00255491	0.00247338
SNRNP25	protein_coding	4.2504	-0.96909	-0.70701	0.00049699	0.00256149	0.00060228
ANGPTL4	protein_coding	0.8664	1.41391	1.24608	0.00170031	0.00256227	0.00155997
GMFB	protein_coding	4.6063	-0.15396	-0.53064	0.326727	0.00256227	0.00603764
GS1-251I9.4	NA	3.3666	-0.28159	-0.63079	0.128823	0.00256859	0.00710243
RHNO1	protein_coding	3.9027	-0.49852	-0.70048	0.0237316	0.00257221	0.00580807
ZNF471	protein_coding	1.3684	0.88009	1.03856	0.0108297	0.0025838	0.00441353
MAN2C1	protein_coding	3.3275	0.28219	0.72909	0.203582	0.00258418	0.00683388
HTATSF1	protein_coding	6.5197	-0.26144	-0.46779	0.0687401	0.00259005	0.00710243
KIAA0895L	protein_coding	3.8941	0.31955	0.63669	0.0999857	0.00259005	0.00718617
ME2	protein_coding	5.777	-0.19514	-0.49017	0.182821	0.00259948	0.00697024
SIPA1L2	protein_coding	4.0131	0.56897	0.56148	0.00365413	0.00260078	0.00258715
ARHGEF37	protein_coding	1.9744	0.23697	0.84072	0.363045	0.00260352	0.00594573
IMMT	protein_coding	6.2553	-0.27764	-0.47053	0.0562	0.00260422	0.0070152
RP1-67M12.2	NA	1.3744	0.44411	1.14853	0.209276	0.00260928	0.00687745
SHC1	protein_coding	6.5463	0.44459	0.61387	0.0245731	0.00261035	0.00593416
ADM2	protein_coding	-0.8324	4.16835	2.14976	3.43e-05	0.00261536	3.32e-05
DOK3	protein_coding	0.575	0.53043	1.11973	0.127039	0.00261798	0.00721492
TSEN15	protein_coding	4.1928	-0.11085	-0.64951	0.579846	0.00262392	0.00485697
FAM72D	protein_coding	1.4658	-0.37897	-1.15177	0.240745	0.00263555	0.00676934
MGAT5B	protein_coding	-0.3829	1.02232	1.56986	0.0409052	0.00264579	0.0067732
MGME1	protein_coding	3.9271	-0.37718	-0.71245	0.0771855	0.00264579	0.0072476
HSP90AA4P	transcribed_processed_pseudogene	0.4367	-0.75706	-1.1406	0.0262189	0.00264894	0.00607768
RP11-134G8.8	NA	1.4743	1.19111	0.96285	0.00098154	0.00268123	0.00104944
SULT1B1	protein_coding	3.4484	-0.83693	-0.84358	0.00406742	0.00268123	0.00278491
DOCK6	protein_coding	5.304	0.42724	0.59148	0.0251312	0.00268508	0.00606323
PAPOLA	protein_coding	7.8721	-0.33988	-0.4907	0.0305124	0.00269251	0.00642652
CLDN14	protein_coding	1.7416	0.31056	0.83067	0.224187	0.00269727	0.00699222
PMEPA1	protein_coding	4.8607	0.35691	0.5786	0.0493898	0.00270358	0.00707877
RHPN1	protein_coding	-0.4637	0.86312	1.28638	0.036602	0.0027057	0.00674883
POLR3G	protein_coding	3.996	-0.45423	-0.66001	0.0287285	0.00271007	0.00636906
WBP11	protein_coding	6.0424	-0.11686	-0.50596	0.454111	0.0027121	0.00567893
TRO	protein_coding	1.2386	0.38272	0.92085	0.178348	0.002715	0.00723757
ERN1	protein_coding	3.4377	1.11724	0.65262	9.27e-05	0.00272173	0.00010981
FBRS	protein_coding	3.6546	0.57168	0.65379	0.0095061	0.00272173	0.00430092
FIGN	protein_coding	4.5995	-0.24551	-0.61006	0.175999	0.00273314	0.00728438
PDLIM3	protein_coding	3.5604	-0.47239	-0.55796	0.0106747	0.00273625	0.00452791
NUP205	protein_coding	6.6922	-0.3165	-0.55628	0.0665671	0.00274867	0.00740402
RSL1D1	protein_coding	7.4401	-0.19116	-0.46129	0.173734	0.00274898	0.00734153
PRPF19	protein_coding	4.6738	-0.20432	-0.52878	0.19636	0.00276242	0.0072476
STK32B	protein_coding	3.6614	0.68507	0.65975	0.0033089	0.00276753	0.00250241
CCDC138	protein_coding	2.0464	-0.55415	-0.94222	0.0507198	0.0027684	0.00721396
SLC43A2	protein_coding	2.705	0.3232	0.79908	0.189142	0.00276905	0.00731162
AC005550.3	antisense	0.5631	-1.09639	-1.35213	0.0121315	0.0027692	0.0048612
RP11-439E19.10	antisense	2.1488	0.25224	0.76494	0.286871	0.00278186	0.00683388
EXOC3L1	protein_coding	0.0325	0.63606	1.42849	0.152687	0.00279763	0.00756847
LINC00475	lincRNA	-0.4765	2.10323	2.33018	0.00866064	0.00280741	0.00421221
FKBP1A	protein_coding	9.3851	-0.19086	0.41451	0.133931	0.00281217	0.00044617
RP11-701H24.2	NA	3.2714	0.28357	0.77966	0.238501	0.00281482	0.00717091
SBDSP1	transcribed_unprocessed_pseudogene	3.8131	-0.35079	-0.56866	0.0462371	0.00281482	0.00721308
RP11-214C8.5	NA	2.5845	1.18633	0.73632	0.00014281	0.00283541	0.00018557
PIGG	protein_coding	4.4554	0.22081	0.52593	0.17136	0.00283566	0.00757406
CNBP	protein_coding	7.2694	-0.21775	-0.49119	0.147914	0.00283566	0.00766445
TMEM187	protein_coding	0.2447	0.62665	1.18643	0.0927807	0.00283566	0.00775723
2017-09-07	protein_coding	6.021	-0.27672	-0.55359	0.102214	0.00285757	0.00780372
PALLD	protein_coding	5.9587	0.42078	0.4701	0.00883901	0.00285922	0.00429025
CTD-3018O17.3	NA	1.3998	0.51295	0.8469	0.055488	0.00286934	0.00752032
ZNF444	protein_coding	2.5024	0.63462	0.75033	0.0118522	0.00287002	0.00491594
DHRS12	protein_coding	1.1162	0.39893	0.94915	0.177277	0.00287239	0.00762082
NCSTN	protein_coding	5.7433	0.16372	0.4723	0.259116	0.00287782	0.00718426
FANCG	protein_coding	3.2219	-0.42472	-0.88514	0.106606	0.00288491	0.00788579
ZSWIM6	protein_coding	6.8371	0.37364	0.52833	0.0293293	0.00289302	0.00674215
GEMIN6	protein_coding	3.7566	-0.44955	-0.7017	0.0399809	0.00289302	0.00718203
NAPB	protein_coding	3.5875	0.43846	0.60461	0.0258333	0.00289477	0.00649555
ABCA10	protein_coding	0.6851	0.73615	1.1354	0.0432808	0.00290421	0.00727717
C19orf48	protein_coding	3.525	-0.228	-0.91644	0.402748	0.00290645	0.00640167
PCBP4	protein_coding	2.5641	0.55173	0.73137	0.0214363	0.00291025	0.00614444
C11orf95	protein_coding	3.735	-0.05081	0.57439	0.80197	0.0029215	0.00231242
TPT1-AS1	antisense	4.6804	0.38634	0.57122	0.0354367	0.0029215	0.00707877
EME2	protein_coding	0.3972	0.13451	1.15705	0.744752	0.00292287	0.00450321
HMGB3P6	processed_pseudogene	1.0259	-0.92688	-1.07955	0.00929525	0.00293425	0.00445096
CDT1	protein_coding	2.1535	-0.21646	-1.10032	0.506603	0.00295329	0.00587044
MX1	protein_coding	1.1371	1.49104	1.05467	0.00039312	0.00295553	0.00048909
GMPSP1	processed_pseudogene	2.8888	-0.75016	-0.72248	0.00341791	0.00295735	0.00264634
TM4SF18	protein_coding	6.7464	-0.59	-0.55391	0.00318431	0.00296859	0.00249376
RP11-434C1.1	NA	0.5886	0.27	1.3012	0.53387	0.00297041	0.00575325
TLE1	protein_coding	4.2245	0.20971	0.53114	0.201526	0.00297865	0.00776075
SENP1	protein_coding	5.1165	-0.2034	-0.53042	0.206379	0.00298373	0.00775279
DDR1	protein_coding	1.0037	0.58663	1.03396	0.0736519	0.00299004	0.00803127
ITGA2	protein_coding	8.1119	0.60664	0.4626	0.00084835	0.00301221	0.00095622
TMEM237	protein_coding	4.7433	-0.83781	-0.58038	0.00040678	0.00301741	0.00051832
ECHDC1	protein_coding	5.0476	-0.27594	-0.5096	0.0791514	0.00301741	0.00813553
MT-RNR1	Mt_rRNA	15.9983	-0.73096	-0.51751	0.00048957	0.00302817	0.00061461
NDRG1	protein_coding	5.1348	0.9289	0.67235	0.00053667	0.00302934	0.00065603
AL590431.1	miRNA	0.1913	0.72751	1.20335	0.0588176	0.00302934	0.00791207
RP11-243J16.7	antisense	1.4598	0.92888	0.87379	0.00310838	0.00303986	0.00248791
UBE2N	protein_coding	4.9272	-0.58778	-0.50252	0.00173033	0.00304387	0.00168738
AP5Z1	protein_coding	2.3875	0.83213	0.89521	0.00729977	0.00304387	0.00405363
PRDX3	protein_coding	6.1647	-0.67307	-0.61085	0.00262406	0.00304396	0.00224278
LAMB4	protein_coding	-0.1319	0.80711	1.32234	0.0575748	0.00304902	0.00794133
MTRNR2L12	protein_coding	8.8785	-1.03199	-0.64626	0.00021301	0.00305268	0.00026419
WDR36	protein_coding	6.4576	-0.17101	-0.4622	0.229652	0.00305375	0.00779127
LRIG2	protein_coding	4.0475	0.48557	0.59819	0.0153886	0.00305467	0.00568023
SEH1L	protein_coding	5.5227	-0.54551	-0.60768	0.00889762	0.00306245	0.00448304
RP11-303E16.2	sense_intronic	2.601	-0.48047	-1.00337	0.108839	0.00306437	0.00835463
RPL36AL	protein_coding	6.9458	-0.57406	-0.51593	0.00252874	0.00307426	0.00220503
RP11-379B18.5	processed_transcript	-0.3775	1.07586	1.60555	0.0399832	0.00308021	0.00752888
ZSCAN31	protein_coding	3.0518	0.52495	0.7098	0.0245711	0.00308032	0.00673176
OSBPL7	protein_coding	2.084	0.62322	0.8602	0.0275404	0.00310804	0.00696788
BMP1	protein_coding	3.164	0.44634	0.72846	0.0550937	0.00311057	0.00803179
SULF1	protein_coding	1.7145	-1.05984	-0.5989	0.00011128	0.00313113	0.00014209
ABI3BP	protein_coding	5.4211	-0.86973	-0.51248	0.00013007	0.00313113	0.00017558
RPS20P31	processed_pseudogene	0.5411	0.74213	1.21089	0.0570925	0.00313445	0.00812997
AIM1	protein_coding	4.2872	-0.92391	-0.70803	0.00089071	0.00313684	0.00100997
TRIM8	protein_coding	4.7435	0.31857	0.49411	0.0450222	0.00313684	0.00780372
ACCS	protein_coding	1.7157	0.4198	0.93402	0.152923	0.00313684	0.00842376
CCND1	protein_coding	10.0121	0.08994	0.47268	0.560665	0.0031701	0.00596219
WDR26	protein_coding	7.0169	0.1439	0.51077	0.370959	0.00317457	0.00714823
HSPA2	protein_coding	2.0086	-0.51005	-0.72116	0.0270524	0.00317561	0.00701703
DDX18	protein_coding	7.0782	-0.13236	-0.48162	0.381577	0.00318051	0.007106
ETAA1	protein_coding	3.7652	-0.27139	-0.61281	0.145095	0.00318051	0.00856377
NPM1P12	processed_pseudogene	-0.0566	-0.59589	-1.37838	0.127243	0.00318504	0.00862428
TTLL7	protein_coding	2.8722	-0.59892	-0.65078	0.0076253	0.00318951	0.00425299
AC007283.5	3prime_overlapping_ncrna	4.0362	-0.00276	0.63936	0.99174	0.00319953	0.00342931
LAMA4	protein_coding	9.3811	0.0613	0.42083	0.66607	0.00319953	0.0054082
CEP68	protein_coding	4.6385	0.34544	0.54154	0.0477105	0.00320932	0.00803992
MTF2	protein_coding	5.0157	-0.28055	-0.55512	0.101921	0.00321148	0.00870322
PSMD7	protein_coding	6.3188	-0.45257	-0.51323	0.0105851	0.00321219	0.00501336
RP11-416A17.6	NA	-0.1018	0.92923	1.21263	0.021762	0.00321219	0.00670172
ANP32B	protein_coding	7.1264	-0.46504	-0.64191	0.0280617	0.00321219	0.00714823
MRFAP1	protein_coding	8.2633	-0.26215	-0.47889	0.0830826	0.00321429	0.00864301
TRA2B	protein_coding	6.9342	-0.38584	-0.4523	0.0127229	0.00321642	0.00543352
MAPKBP1	protein_coding	3.8693	0.58244	0.61462	0.00678342	0.00321884	0.00404362
GOLGA4	protein_coding	7.441	0.02467	-0.50291	0.89067	0.00322638	0.00295172
PTGES3P1	processed_pseudogene	4.2599	-0.42377	-0.64659	0.0399283	0.00325279	0.00783176
IMPA2	protein_coding	0.6501	-0.97886	-1.07488	0.00756133	0.00326363	0.00428722
CTSK	protein_coding	2.2202	0.3174	0.76461	0.187922	0.00326678	0.00858225
C4orf27	protein_coding	3.5625	-0.62966	-0.68433	0.00790167	0.00327414	0.00440032
EPAS1	protein_coding	8.2967	0.33385	0.48722	0.0363736	0.00327414	0.00772694
TRMT6	protein_coding	3.55	-0.20119	-0.64877	0.306968	0.00327549	0.00780372
UTP20	protein_coding	6.4679	-0.05351	-0.4892	0.751278	0.00328837	0.00506164
NUDT11	protein_coding	1.9476	-0.49638	-0.84201	0.0567907	0.00329176	0.00848055
DAW1	protein_coding	1.3925	-1.5144	-0.84823	0.00011902	0.00329198	0.00016016
ZNFX1	protein_coding	5.4803	0.53775	0.49128	0.00292227	0.00329198	0.00248829
LA16c-313D11.12	processed_transcript	-0.3608	0.47984	1.25154	0.23223	0.00329198	0.00837241
SIAE	protein_coding	3.1257	0.08618	0.66077	0.707215	0.00330154	0.00534921
SEMA4G	protein_coding	0.5484	0.72439	1.23479	0.0698598	0.00330154	0.00873062
NUP160	protein_coding	5.735	-0.31844	-0.50781	0.0505339	0.00330799	0.00835463
CDCA7L	protein_coding	5.4363	-0.21377	-0.52251	0.18553	0.00330815	0.00871925
PIGK	protein_coding	3.8947	-0.34912	-0.63966	0.0784771	0.00332193	0.00887551
PIP5K1C	protein_coding	4.3318	0.38131	0.58701	0.0454197	0.00332562	0.00823057
NSMCE4A	protein_coding	4.3552	-0.31061	-0.51314	0.0555364	0.00333141	0.00854831
SCFD2	protein_coding	4.0066	-0.7068	-0.53313	0.00084835	0.00333313	0.00097956
ANKRD12	protein_coding	5.2673	0.12302	-0.56891	0.494695	0.00333313	0.00155997
MYO1D	protein_coding	6.2358	-0.07742	0.43235	0.590525	0.00333313	0.00186639
LRRC8D	protein_coding	5.1245	-0.50731	-0.47322	0.003307	0.00333313	0.00272637
HMGN5	protein_coding	1.4998	-0.78838	-0.94257	0.0118745	0.00333313	0.0054082
RP11-497H17.1	lincRNA	-0.1643	0.39211	1.27127	0.342335	0.00333313	0.00770017
WDR66	protein_coding	2.056	0.12519	0.84967	0.670867	0.00333916	0.00565238
MAPRE3	protein_coding	0.1255	0.97905	1.14395	0.0127444	0.00334207	0.00559787
SERINC2	protein_coding	3.3271	0.60781	0.73349	0.0149194	0.00334207	0.00596219
FTLP3	processed_pseudogene	7.6704	0.62894	0.45551	0.00066307	0.00335131	0.00080228
ZC3H15	protein_coding	6.1143	-0.10963	-0.77768	0.675323	0.00335131	0.00565062
TCP11L2	protein_coding	3.3922	0.56782	0.76442	0.0258188	0.00335131	0.00720553
ANKRD36C	protein_coding	6.3603	-0.62471	-0.53238	0.00193382	0.00335142	0.00189873
AHCTF1P1	NA	5.3437	-0.2148	-0.48443	0.153353	0.00335142	0.00904611
PKP4	protein_coding	5.7253	-0.52999	-0.45111	0.0019114	0.00335427	0.00187482
UTP14A	protein_coding	4.761	0.02487	-0.52816	0.893584	0.00335974	0.00312049
ITGAV	protein_coding	7.0961	0.05824	0.42639	0.690197	0.00335974	0.00558828
PPP2CA	protein_coding	6.7115	-0.33889	-0.4694	0.0294475	0.00335974	0.00751582
CEP57	protein_coding	4.9452	-0.16787	-0.51413	0.291129	0.00335974	0.00819325
NDST1	protein_coding	5.591	0.42616	0.54427	0.0201915	0.00336292	0.00675822
TPM3P8	processed_pseudogene	5.1667	-0.52408	-0.4818	0.00312818	0.00337437	0.00263239
PRPF38A	protein_coding	4.5242	-0.12674	-0.55181	0.467087	0.00341009	0.00710243
CCNH	protein_coding	4.4882	-0.17618	-0.53945	0.290008	0.00341009	0.00832641
UCK2	protein_coding	5.4227	-0.20312	-0.44722	0.145761	0.00341009	0.00920882
IDUA	protein_coding	0.4332	0.51743	1.09685	0.14263	0.00341009	0.00921381
PCDH12	protein_coding	3.1762	0.15547	0.63836	0.453742	0.00341683	0.00718426
NINL	protein_coding	3.3615	0.40483	0.66793	0.0605808	0.00342206	0.00889171
CRYGS	protein_coding	1.6045	0.34846	0.80995	0.176957	0.00342206	0.00911843
ULK1	protein_coding	2.8133	0.55862	0.74277	0.0246343	0.0034245	0.00722271
TMEM201	protein_coding	2.9788	-0.39782	-0.64922	0.0525658	0.00342597	0.0087035
ENO1	protein_coding	8.2129	-0.47553	-0.61366	0.021607	0.00342733	0.00699344
LRRC58	protein_coding	5.4603	-0.25006	-0.50672	0.114779	0.00342866	0.00931414
MEF2D	protein_coding	5.416	0.1578	0.47668	0.297027	0.00343861	0.00835463
FURIN	protein_coding	5.4181	0.2569	0.54826	0.139137	0.00343879	0.00930816
DBF4B	protein_coding	2.9586	-0.11011	-0.64969	0.597035	0.00344599	0.00634427
DPYD	protein_coding	4.489	-0.3199	-0.53755	0.0606386	0.00344599	0.00897481
RP11-737O24.3	transcribed_processed_pseudogene	2.6494	-0.27941	-0.6756	0.174725	0.00345524	0.00921318
LRSAM1	protein_coding	2.6195	0.56707	0.82021	0.036463	0.00346262	0.00814397
MXI1	protein_coding	2.5771	0.75127	0.84117	0.0104718	0.003465	0.00523264
DCTPP1	protein_coding	4.2055	-0.54636	-0.64982	0.0133895	0.003465	0.00587044
CTB-47B11.3	antisense	-0.3922	1.26481	1.36226	0.00833662	0.00346696	0.00470186
ZNF767	NA	3.3219	0.50856	0.621	0.0162486	0.00346696	0.00636906
ZNF792	protein_coding	4.1525	0.30517	0.53482	0.0752358	0.00346696	0.0092304
ITFG3	protein_coding	3.764	0.40775	0.62578	0.0462258	0.00347381	0.00862428
TIE1	protein_coding	6.2626	0.17334	0.50381	0.278785	0.00349405	0.00862665
ADHFE1	protein_coding	-0.4382	0.27419	1.35638	0.552626	0.00349434	0.00674883
SSRP1	protein_coding	6.4065	-0.3948	-0.58142	0.0392206	0.00350104	0.00835568
TCTA	protein_coding	3.2795	0.21665	0.59449	0.251717	0.00350692	0.00886234
DIMT1	protein_coding	5.1488	-0.3439	-0.48328	0.0308908	0.00350997	0.0078733
HNRNPU	protein_coding	9.0579	-0.23939	-0.4258	0.0800903	0.00350997	0.00939204
ZNF100	protein_coding	2.8518	-0.44318	-0.80711	0.078146	0.00351683	0.00939204
CISD2	protein_coding	4.5546	-0.78987	-0.62726	0.00128453	0.0035363	0.0014137
RPA2	protein_coding	4.5698	-0.646	-0.83874	0.0209979	0.00355013	0.00707877
FAM13A	protein_coding	4.0193	-0.21105	-0.56571	0.227278	0.0035727	0.00918704
CRY1	protein_coding	4.2913	-0.17606	-0.55673	0.309311	0.00359728	0.00862665
RP5-1009N12.1	processed_pseudogene	2.1748	-0.40208	-0.79808	0.100527	0.00359728	0.00971134
DNAJC18	protein_coding	3.9365	0.32998	0.60351	0.0890428	0.00359981	0.00966305
P4HA2	protein_coding	4.4593	0.44256	0.53943	0.0166103	0.00360479	0.00658807
CSTF2	protein_coding	3.9059	-0.19329	-0.56631	0.269638	0.00361572	0.00897896
DNAJA1	protein_coding	8.4223	-0.35294	-0.50179	0.0348478	0.00361998	0.00832641
TRMT10C	protein_coding	4.2344	-0.12942	-0.54829	0.456507	0.00362747	0.0075904
IPO5	protein_coding	8.3548	-0.32175	-0.49617	0.0487064	0.00362747	0.00900498
HLA-DPA1	protein_coding	-1.0028	-0.51473	-1.11913	0.135162	0.00362747	0.0097898
ABLIM3	protein_coding	5.5261	0.56707	0.4481	0.00126213	0.00362765	0.00139274
FTH1P7	processed_pseudogene	4.4333	0.58206	0.61978	0.00818841	0.0036311	0.00477212
RP11-312J18.5	processed_pseudogene	5.367	-0.4634	-0.51172	0.00995967	0.0036311	0.00523921
PCSK1	protein_coding	3.0192	0.18971	0.57078	0.300607	0.0036311	0.00881091
TMEM107	protein_coding	2.4907	-0.57198	-1.02857	0.072719	0.0036311	0.00959309
HNRNPA1P7	processed_pseudogene	3.1555	-0.36699	-0.78926	0.13097	0.00364258	0.0098566
B3GNT5	protein_coding	4.7869	-0.39142	-0.48113	0.0168234	0.00364957	0.00670745
CCSAP	protein_coding	2.8803	-0.24177	-0.73667	0.286212	0.00364957	0.00897711
NPDC1	protein_coding	4.0951	0.37941	0.74379	0.112554	0.00364957	0.0098816
IMPG2	protein_coding	0.5453	0.84297	1.18054	0.0333829	0.00365978	0.00830359
TMEM126A	protein_coding	4.3558	-0.0931	-0.53469	0.595484	0.00366018	0.00677845
INCA1	protein_coding	0.6662	0.62758	0.97152	0.050674	0.00366018	0.00916355
RALGDS	protein_coding	2.9241	0.59588	0.69469	0.0133792	0.00366838	0.0060585
EPS8	protein_coding	4.9663	-0.12228	-0.46805	0.411208	0.00366975	0.00804872
GNAI3	protein_coding	7.3211	-0.38324	-0.46517	0.0168525	0.00367601	0.00674362
ARRB1	protein_coding	4.7571	0.40835	0.50995	0.0191427	0.00367601	0.00703079
NPIPB5	protein_coding	6.2447	0.41753	0.58652	0.0338589	0.00367601	0.00836239
CXCR6	protein_coding	1.1831	0.71821	0.96034	0.0268488	0.00367603	0.00780742
RP11-631N16.2	lincRNA	0.614	0.11494	0.99833	0.751784	0.00367669	0.00574184
TMEM126B	protein_coding	5.189	-0.40172	-0.51398	0.0208899	0.00367669	0.00721492
PHF21A	protein_coding	5.1899	0.34944	0.54636	0.0518096	0.00367726	0.0092304
API5	protein_coding	6.2636	-0.24786	-0.50111	0.12062	0.00367743	0.00998303
SLC25A5	protein_coding	7.5118	-0.52146	-0.68651	0.0251358	0.00368559	0.0076906
AQR	protein_coding	6.4152	-0.11707	-0.43719	0.406898	0.00368559	0.00815211
RNF207	protein_coding	0.4189	0.44948	0.93985	0.140371	0.00368768	0.00998303
AP000695.1	NA	2.4385	0.08683	0.71531	0.73523	0.00369322	0.00590304
AGO4	protein_coding	4.2596	0.4342	0.54615	0.0199665	0.00369322	0.00715925
NAA15	protein_coding	6.369	-0.16845	-0.59394	0.37712	0.00369322	0.00840926
TNFAIP1	protein_coding	5.7532	0.29509	0.42581	0.0375474	0.00369322	0.00866479
COA6	protein_coding	3.9912	-0.23728	-0.53508	0.155355	0.00369418	0.00997554
EED	protein_coding	3.7621	-0.28582	-0.67572	0.172563	0.00369879	0.00990822
RP11-274B21.1	unprocessed_pseudogene	4.2731	0.31568	0.5904	0.0976489	0.00370769	0.0100281
RP11-196I18.3	processed_pseudogene	-0.228	-0.61543	-1.28702	0.109432	0.00371374	0.0100757
CTPS1	protein_coding	5.6784	-0.40671	-0.49672	0.0170451	0.00371841	0.00683148
PACS2	protein_coding	4.0474	0.3179	0.58939	0.0953879	0.00371841	0.0100467
CTD-2368P22.1	processed_transcript	1.718	0.44663	0.86001	0.109042	0.00371841	0.0100937
TUBGCP5	protein_coding	4.1865	-0.37941	-0.52883	0.0304869	0.00373519	0.00827585
SNRNP40	protein_coding	4.8349	-0.46919	-0.62556	0.0253076	0.00374229	0.00780372
AKAP9	protein_coding	6.8859	0.15346	-0.48617	0.324197	0.00375149	0.00120691
2017-03-02	protein_coding	2.8805	0.14937	0.67003	0.506843	0.00377174	0.0075904
LAMC1	protein_coding	9.1038	0.02213	0.4005	0.879988	0.00377208	0.00502703
RN7SL696P	NA	0.1899	0.88883	1.27309	0.0375748	0.00378765	0.00885056
EDN1	protein_coding	8.445	0.27976	0.44389	0.055792	0.0037901	0.00963435
TOR1AIP1	protein_coding	4.9833	-0.28049	-0.48424	0.0716611	0.00379433	0.00998194
PRSS12	protein_coding	2.6794	-0.00834	-0.63851	0.971447	0.00381832	0.00442831
MESTP1	processed_pseudogene	-0.8132	-0.8758	-1.16686	0.0216904	0.00381851	0.00752888
RSL24D1	protein_coding	4.9871	-0.07011	-0.59907	0.735615	0.00382061	0.00607038
RP1-142L7.5	antisense	3.5563	0.35642	0.8003	0.167971	0.00383819	0.0102448
LRRC27	protein_coding	2.0338	0.54056	0.74283	0.031181	0.0038482	0.00850528
MAP3K5	protein_coding	2.9458	-0.54804	-0.62657	0.0118402	0.00385354	0.00593341
CTSA	protein_coding	6.2937	0.36321	0.46863	0.0237316	0.00385354	0.00779709
CEP170B	protein_coding	3.2464	0.56805	0.71953	0.0214738	0.00388508	0.00757406
MFAP1	protein_coding	6.0644	-0.28997	-0.48091	0.0652402	0.00390079	0.0100484
ITGB8	protein_coding	3.7047	0.55482	0.59903	0.00937497	0.00391003	0.00534909
RAB38	protein_coding	2.5804	-0.277	-0.68363	0.191252	0.00391633	0.0102978
NUP43	protein_coding	4.7894	-0.37851	-0.56352	0.041861	0.00391695	0.0092771
BCL2L1	protein_coding	5.354	0.51073	0.49294	0.00490413	0.00392905	0.00377978
GINS4	protein_coding	1.9764	-0.32931	-0.82422	0.192391	0.00394395	0.010351
VPS39	protein_coding	6.0628	0.39477	0.41871	0.00882546	0.00394982	0.005216
LINC00702	lincRNA	0.1949	-1.20597	-1.50215	0.018201	0.00396091	0.00721492
HSPA9P1	processed_pseudogene	4.2067	0.03066	-0.54849	0.875205	0.00396098	0.00361972
NDE1	protein_coding	3.7231	-0.36325	-0.60399	0.0622163	0.00396265	0.0101066
RP6-145B8.3	NA	2.7328	-0.39167	-0.62278	0.0521781	0.00398405	0.0098566
NINJ1	protein_coding	3.1886	0.86092	0.72734	0.00199926	0.00398943	0.0020868
DFNA5	protein_coding	4.5343	0.58249	0.52682	0.00325886	0.00399434	0.00291139
LCA5L	protein_coding	1.0753	0.60995	0.89666	0.0431229	0.00399946	0.00949504
RP11-244F12.3	antisense	2.8635	0.43971	0.64387	0.0418504	0.00400079	0.0094319
JAG2	protein_coding	4.7571	0.27504	0.70484	0.229724	0.00400079	0.0102448
SHMT2	protein_coding	5.9474	0.29316	-0.60026	0.126709	0.0040048	0.00060131
XPO4	protein_coding	6.2814	-0.32886	-0.48347	0.042216	0.0040056	0.00946608
DYNC1LI1	protein_coding	5.9302	-0.2319	-0.43603	0.100106	0.00401687	0.010771
TRAPPC6A	protein_coding	0.562	0.1905	1.21199	0.665315	0.00404389	0.00696788
RGAG4	protein_coding	0.7126	1.15896	0.99426	0.00217472	0.00405417	0.00223847
ANPEP	protein_coding	7.9779	0.02269	0.5208	0.906382	0.00407459	0.00519931
ABCD4	protein_coding	4.3107	0.35896	0.53023	0.0438142	0.00407459	0.00966305
ZDHHC9	protein_coding	6.1334	0.38258	0.44845	0.0153928	0.00407528	0.0069065
CHRAC1	protein_coding	5.2656	-0.31667	-0.49513	0.0525451	0.00407528	0.0100336
HDAC9	protein_coding	4.1988	-0.12222	0.6288	0.573668	0.00408406	0.00223847
PDGFC	protein_coding	3.2498	0.67608	0.59915	0.00286763	0.00408685	0.00270366
DNHD1	protein_coding	3.6088	0.36351	0.6821	0.103816	0.00408685	0.0109336
PCSK7	protein_coding	4.906	0.25886	0.54538	0.145095	0.00409948	0.0109531
THOC7	protein_coding	3.6926	-0.2971	-0.557	0.0954384	0.00410067	0.0109326
MTMR2	protein_coding	6.556	-0.23444	-0.43722	0.0998619	0.0041016	0.0109403
FEZ2	protein_coding	5.5086	-0.35193	-0.44931	0.0225179	0.00410188	0.00800251
TARS	protein_coding	6.8109	-0.16422	-0.53549	0.345927	0.00410258	0.00959309
ATP2B1	protein_coding	4.7422	-0.26703	-0.62599	0.178501	0.00410258	0.0108941
MXD4	protein_coding	3.5541	0.37854	0.8304	0.164281	0.00410258	0.0109336
RP11-295P9.8	antisense	1.0129	0.11787	0.86236	0.707755	0.00410312	0.00678893
SEPHS1	protein_coding	4.9928	-0.46277	-0.54795	0.0155228	0.00410312	0.00697024
RP11-529H20.3	processed_pseudogene	1.5582	-0.70897	-0.89448	0.0188599	0.00410312	0.00750949
AP000654.4	lincRNA	1.1152	0.50288	1.0926	0.162556	0.00410312	0.0109406
GLO1	protein_coding	5.6373	-0.34319	-0.50421	0.0420806	0.0041037	0.00966305
LRRC59	protein_coding	5.9356	-0.5689	-0.44136	0.00130336	0.00412781	0.00150239
SF3A3	protein_coding	5.757	-0.23229	-0.4747	0.130016	0.00413859	0.0111228
TOP3A	protein_coding	4.3097	-0.36699	-0.5187	0.0348484	0.00419498	0.00931555
PROX2	protein_coding	0.5463	0.19938	1.16096	0.632994	0.00420089	0.00742923
ZNF876P	transcribed_unprocessed_pseudogene	0.4744	-0.08881	-1.23895	0.828227	0.00420438	0.00596507
CCT8	protein_coding	7.3435	-0.40682	-0.5897	0.0417585	0.00420438	0.00979387
EML4	protein_coding	5.1024	-0.26667	-0.48502	0.0904958	0.00420438	0.01111
FAM101B	protein_coding	5.1624	-1.14238	-0.50947	3.19e-05	0.00422169	2.9e-05
NUBP1	protein_coding	2.1645	-0.34173	-0.70268	0.122671	0.00422209	0.0112756
ELOVL6	protein_coding	5.1807	-0.86011	-0.44924	8.63e-05	0.00422237	0.00010054
TNKS1BP1	protein_coding	3.7869	0.2768	0.59533	0.155338	0.0042239	0.0112378
RP11-334C17.5	antisense	0.1436	1.31716	1.56056	0.0168632	0.00422426	0.00729881
CCNE1	protein_coding	2.1002	-0.98642	-0.8951	0.00334239	0.00422581	0.00307821
RNASEH2B	protein_coding	2.4026	-0.26857	-0.66851	0.201278	0.00422581	0.0110378
PDS5B	protein_coding	6.0648	-0.10998	-0.60612	0.594606	0.00422944	0.00780372
FHP1	processed_pseudogene	0.3804	-0.66139	-1.09967	0.0569419	0.00423126	0.0105828
PXN	protein_coding	6.4792	0.40371	0.45155	0.0126188	0.00425199	0.00649555
CTD-2587M2.1	lincRNA	1.1763	0.26002	0.82867	0.346985	0.00425283	0.00991867
DICER1-AS1	antisense	-0.4967	0.37245	1.31544	0.408466	0.00428451	0.00946608
GADD45A	protein_coding	5.3773	1.39326	0.52424	4.96e-06	0.00433204	4.97e-06
CTA-407F11.6	NA	1.9509	-0.51496	-0.71066	0.0304893	0.00433662	0.00918978
NARS	protein_coding	7.6142	-0.00632	-0.42899	0.969893	0.00434076	0.00507206
C17orf103	NA	2.1808	0.23014	0.73776	0.348485	0.00434076	0.0100661
ZNF814	protein_coding	3.1001	0.22154	0.66757	0.316875	0.00434216	0.0103635
EEF1E1	protein_coding	3.3016	-0.56042	-0.5994	0.00937497	0.00434459	0.00565549
ZMIZ2	protein_coding	4.6578	0.46066	0.55515	0.0182644	0.00434689	0.00766208
UTP11L	protein_coding	5.1161	-0.25519	-0.4465	0.0809417	0.00435308	0.0113009
NFYB	protein_coding	3.366	-0.3718	-0.59144	0.0557691	0.00435493	0.010761
GS1-309P15.4	processed_pseudogene	3.2284	-0.73941	-0.68685	0.00403682	0.00435638	0.0035405
TIPRL	protein_coding	4.6563	-0.1011	-0.47413	0.522337	0.00435674	0.00865033
AIMP2	protein_coding	2.8755	-0.34718	-0.61247	0.0791514	0.00436255	0.0113009
WFS1	protein_coding	4.0739	0.39978	0.65348	0.0672988	0.00436571	0.01111
OR7E13P	unprocessed_pseudogene	0.3642	0.7328	1.12775	0.055001	0.00436692	0.010761
PLD1	protein_coding	6.3421	0.03895	0.43979	0.812121	0.00438026	0.00639459
CTC-308K20.3	processed_pseudogene	3.6836	-0.67169	-0.6205	0.00395033	0.00439502	0.0035038
COL5A1	protein_coding	6.2912	-0.47411	0.48967	0.00877209	0.00440606	8.34e-05
CPEB4	protein_coding	5.1666	0.67975	0.50206	0.00096717	0.00440606	0.00116612
ALG14	protein_coding	2.2666	-0.82839	-0.68113	0.00193845	0.00440606	0.00210931
KBTBD11	protein_coding	1.3468	0.50638	0.76325	0.051126	0.00440606	0.0106824
PHLDB1	protein_coding	5.6565	0.22544	0.55159	0.214085	0.00440606	0.0113569
CNTNAP3	protein_coding	4.948	0.26963	0.51769	0.114514	0.00440686	0.0117131
DACT1	protein_coding	-0.2533	0.60251	1.7707	0.316259	0.00441773	0.0106064
AC110769.3	lincRNA	-0.4347	1.45689	1.22162	0.00202389	0.0044324	0.00219627
TMA16	protein_coding	4.3688	-0.34128	-0.53684	0.055122	0.00443376	0.0109125
MRTO4	protein_coding	4.3389	-0.59663	-0.71012	0.0164253	0.0044417	0.00745751
TNFRSF14	protein_coding	2.1448	1.07148	0.80671	0.00102475	0.00444705	0.00125241
VKORC1L1	protein_coding	5.8763	-0.51645	-0.41471	0.00175845	0.00445333	0.0019584
USP37	protein_coding	3.902	-0.34363	-0.61109	0.0833568	0.00445333	0.0115953
VEPH1	protein_coding	7.0621	-0.72389	-0.43116	0.00023216	0.00445911	0.00029788
MAPRE1	protein_coding	6.8189	-0.43593	-0.51602	0.0173187	0.00446043	0.00763626
MFSD2A	protein_coding	1.2909	-0.29616	-0.85587	0.258493	0.0044606	0.0111907
MRPS28	protein_coding	3.1981	-0.59138	-0.79936	0.0293293	0.00446999	0.00929408
CDIP1	protein_coding	3.3608	0.88544	0.68037	0.00122537	0.00447744	0.00144828
HSPD1P6	transcribed_processed_pseudogene	1.4036	-0.77046	-0.82562	0.00882546	0.00447744	0.0056043
TSPAN9	protein_coding	2.6514	0.17747	0.60721	0.383299	0.00447938	0.0101267
CAND1	protein_coding	7.1168	-0.29523	-0.43485	0.0461587	0.00447938	0.0106064
PHBP11	processed_pseudogene	0.5726	-0.62885	-0.92269	0.0358376	0.00448598	0.00991867
PDHB	protein_coding	6.3434	-0.41803	-0.44335	0.00993217	0.00448778	0.00593341
FKBP8	protein_coding	2.17	0.17324	0.67062	0.447309	0.00448778	0.00962239
FAM160B2	protein_coding	2.606	0.77409	0.82821	0.0101659	0.00449447	0.0060005
ITPRIPL1	protein_coding	0.1553	-0.95528	-1.28129	0.0247697	0.00450274	0.00885718
GPR107	protein_coding	5.4712	0.25919	0.43959	0.0777189	0.00450274	0.0116411
snoU13	snoRNA	4.5651	0.27768	0.53248	0.115401	0.00450274	0.0119918
ISOC1	protein_coding	3.9849	-0.39845	-0.56665	0.0372588	0.00450276	0.0100661
MMP11	protein_coding	0.5076	0.28692	1.17024	0.481655	0.0045117	0.00938292
MBP	protein_coding	3.0551	0.39875	0.62401	0.0584814	0.0045117	0.0111946
FLYWCH1	protein_coding	3.019	0.88161	0.73202	0.00203479	0.0045187	0.00221887
PPP1R3B	protein_coding	5.8795	0.1912	0.52643	0.272626	0.0045187	0.0112378
LETM2	protein_coding	3.0962	-0.29955	-0.58442	0.112246	0.0045354	0.0120719
HMGN2P6	processed_pseudogene	-0.1819	-0.8149	-1.44166	0.071216	0.00453981	0.0116043
POLR3B	protein_coding	4.8241	-0.29813	-0.45	0.0491123	0.00455009	0.0109021
HID1	protein_coding	3.5119	0.08731	0.72512	0.746636	0.00455893	0.00720553
EZH1	protein_coding	3.8848	0.46109	0.53146	0.0151466	0.00456412	0.00732435
HKR1	protein_coding	4.0492	0.32343	0.52597	0.067522	0.00456412	0.0115675
RP11-142O6.1	sense_intronic	-0.1997	0.54381	1.27905	0.209224	0.00456454	0.0118307
UBE2S	protein_coding	2.4945	-0.76936	-0.95989	0.0200857	0.00456522	0.00827585
NOVA2	protein_coding	5.5159	0.17514	0.50453	0.296406	0.00456956	0.0111907
ACAT2	protein_coding	5.8245	-1.63616	-0.52793	2.51e-06	0.00458046	2.26e-06
MTHFD2	protein_coding	5.1933	0.52859	-0.63413	0.0158327	0.00458503	0.00013712
OPN1SW	protein_coding	2.0473	-1.11411	-0.69319	0.00032788	0.00460138	0.00045078
ZNF841	protein_coding	3.3043	0.49003	0.56772	0.015632	0.00460138	0.00748065
DECR2	protein_coding	2.3163	0.20788	0.66521	0.352283	0.00460906	0.0107841
CFLAR-AS1	antisense	1.683	0.46505	0.83098	0.0958948	0.00461355	0.0121626
POP7	protein_coding	3.2487	-0.73227	-0.80426	0.0111126	0.00462147	0.00642652
SDCBP2-AS1	antisense	3.1985	0.4828	0.78618	0.0689927	0.00462674	0.0117251
GRIPAP1	protein_coding	3.8413	0.58926	0.61337	0.00885334	0.00462778	0.00572912
RP11-144L1.8	processed_pseudogene	0.5386	-0.89005	-1.15428	0.0214738	0.00463349	0.00858231
ZZZ3	protein_coding	6.0616	-0.20817	-0.44519	0.155437	0.00463349	0.0123175
ANKRD6	protein_coding	1.2547	0.38156	0.86916	0.190007	0.00463673	0.0121789
NTPCR	protein_coding	4.1269	0.40226	0.5519	0.0351281	0.00464497	0.0101267
HIRIP3	protein_coding	2.7203	-0.31001	-0.86787	0.259486	0.00465011	0.011683
PYROXD2	protein_coding	1.4418	0.33948	0.85173	0.235245	0.00466185	0.0118991
GTF2A2	protein_coding	5.2954	-0.49523	-0.55155	0.0128092	0.00466226	0.00693903
GPR155	protein_coding	2.0015	0.15105	0.93585	0.658862	0.00466349	0.00814397
RP1-281H8.3	processed_pseudogene	1.6088	-0.56056	-0.77978	0.0327113	0.00466349	0.00996258
LDHAP2	processed_pseudogene	0.8585	-0.88422	-0.8147	0.00391748	0.00467808	0.00358891
SNRNP48	protein_coding	4.0282	-0.15604	-0.58604	0.416682	0.00468069	0.010341
SH3BP2	protein_coding	4.637	0.15005	0.54841	0.419167	0.00468122	0.0103222
BZW2	protein_coding	5.5964	-0.42771	-0.42025	0.00648002	0.00468245	0.0048755
PRPF40A	protein_coding	6.7276	-0.09425	-0.40088	0.49296	0.00469681	0.009727
NPIPB11	protein_coding	3.0354	0.4483	0.64814	0.0442806	0.00469681	0.0109326
AHSA1	protein_coding	5.9115	-0.35023	-0.52498	0.0503845	0.00469681	0.0112315
CD163L1	protein_coding	2.91	0.46327	0.57318	0.0219049	0.00469835	0.00876238
C5orf45	protein_coding	2.2271	0.8728	0.85396	0.00618942	0.00470877	0.00476203
DAK	NA	1.4534	0.74296	0.81078	0.0117927	0.00476735	0.00674693
C1RL-AS1	antisense	0.1725	0.89333	1.07873	0.0200083	0.00477035	0.00850918
PAPPA	protein_coding	1.0958	0.63598	1.04836	0.0739894	0.00477035	0.0121789
CDH13	protein_coding	6.7585	0.03847	0.45244	0.822013	0.00477946	0.00694327
WDR52	NA	3.0191	0.29538	0.6597	0.179933	0.00479184	0.0126235
DDAH1	protein_coding	6.8755	-0.31199	-0.4439	0.0422738	0.00479514	0.0109336
RP11-64D22.5	lincRNA	-0.8439	1.14549	1.44871	0.0265954	0.00479785	0.0095036
CTSF	protein_coding	1.5577	0.24297	0.80084	0.374327	0.00479785	0.0110053
GNAT2	protein_coding	1.1335	0.26176	0.873	0.382373	0.00479908	0.0109378
RAD51-AS1	processed_transcript	0.2715	0.71054	1.04477	0.0491123	0.00480056	0.0113391
TTC21A	protein_coding	1.8238	0.69429	0.95517	0.0368924	0.00480388	0.0106064
CEP63	protein_coding	4.998	-0.35472	-0.48536	0.0343777	0.00480868	0.0103383
ACYP1	protein_coding	3.9025	-0.63992	-0.77841	0.0196594	0.00483185	0.00853244
PCDHB13	protein_coding	-0.9813	1.28131	1.67301	0.0308908	0.00483185	0.0100336
RP11-923I11.6	lincRNA	-0.3647	0.62739	1.37968	0.182303	0.00483185	0.0127499
RPP40	protein_coding	2.2588	-0.67886	-0.67546	0.00671014	0.0048358	0.00506164
TMEM171	protein_coding	2.7191	-0.3875	-0.64196	0.0678684	0.0048433	0.0121949
SMS	protein_coding	6.0766	-0.47286	-0.50848	0.0113391	0.00488858	0.00672831
NCAPH2	protein_coding	1.7271	-0.58765	-0.81545	0.0336742	0.00488963	0.0103648
ZNF280B	protein_coding	3.792	-0.27296	-0.52901	0.115519	0.00489037	0.0129828
GDI2P2	processed_pseudogene	4.2106	-0.36417	-0.47951	0.0288481	0.00489261	0.00990137
KLHL17	protein_coding	0.8905	-0.00453	0.87013	0.990873	0.00490196	0.00543614
SHMT1	protein_coding	3.3264	-0.56353	-0.71008	0.0233375	0.00490196	0.00920882
CLCF1	protein_coding	1.4405	0.5673	0.90637	0.0674247	0.00491159	0.0122985
SNRPEP2	processed_pseudogene	1.9324	-0.70013	-0.72807	0.00858685	0.00491715	0.00580807
ZNF695	protein_coding	0.1109	-0.17357	-1.51873	0.728547	0.00491879	0.00795233
HPDL	protein_coding	-0.0609	-0.37303	-1.01553	0.234157	0.00491913	0.0125935
MATR3	protein_coding	7.7716	-0.16366	-0.42142	0.24535	0.00493315	0.0125175
BCCIP	protein_coding	6.4801	-0.51145	-0.5928	0.0168864	0.00493374	0.00812499
C12orf29	protein_coding	3.6711	-0.20432	-0.61427	0.307461	0.00493374	0.0119619
KLHL8	protein_coding	5.0273	-0.2383	-0.51122	0.157195	0.00493374	0.0131257
MCAM	protein_coding	8.1528	0.09915	0.45359	0.532089	0.00495103	0.00986443
GIGYF1	protein_coding	2.479	0.76448	0.74193	0.00617303	0.00495591	0.00487449
SMC6	protein_coding	5.9692	-0.05588	-0.62646	0.811365	0.00496252	0.00726556
ABCC10	protein_coding	3.1624	0.44867	0.62527	0.0395039	0.00497335	0.0110544
SNX18P9	processed_pseudogene	-0.3434	0.81311	1.10599	0.0363109	0.00497483	0.0108427
PCMT1	protein_coding	5.643	-0.41423	-0.50441	0.0211818	0.00498517	0.00898096
RNF215	protein_coding	1.9204	0.58881	0.83311	0.0425046	0.00498517	0.0112756
RP11-343N15.1	NA	1.3682	0.75599	0.83269	0.0128458	0.00500587	0.00720553
AC132872.2	NA	1.1461	0.13107	0.79762	0.657057	0.00500587	0.00880515
AC010240.2	processed_pseudogene	1.1547	0.50416	0.96834	0.126117	0.00502578	0.0133607
TRAF4	protein_coding	1.9913	0.86879	0.77167	0.0035286	0.00503486	0.0034509
ANP32C	processed_pseudogene	1.6229	-0.71016	-0.90997	0.0244461	0.00503932	0.00954181
ZNF667	protein_coding	0.8169	0.54738	0.95146	0.0920817	0.00503932	0.0131461
LINC00669	NA	1.0118	-0.53896	-1.03868	0.105756	0.00505089	0.0133268
CYBA	protein_coding	0.9529	0.63114	1.10301	0.0953519	0.00507814	0.0132596
TPM3	protein_coding	9.6226	-0.46588	-0.41406	0.00392747	0.00507945	0.00372378
POP1	protein_coding	4.4057	-0.48013	-0.52386	0.0120839	0.00507945	0.00707623
PMS1	protein_coding	3.7552	-0.35671	-0.60731	0.0779009	0.00508345	0.0129828
SLC6A9	protein_coding	-0.7575	4.10829	1.58173	4.96e-06	0.00509102	4.92e-06
MTIF2	protein_coding	5.3254	0.0676	-0.50809	0.712319	0.0051096	0.00360891
FBN1	protein_coding	6.3205	-0.36444	0.42053	0.0177374	0.00512435	0.00016391
GS1-44D20.1	processed_pseudogene	7.6667	-0.53447	-0.40658	0.00147551	0.00512435	0.00177484
MASP2	protein_coding	2.435	0.59069	0.73628	0.0245711	0.00512435	0.00967536
FLG	protein_coding	-1.1139	1.2373	1.78849	0.0475749	0.00512435	0.011818
ROBO4	protein_coding	7.0279	0.31035	0.49389	0.0675462	0.00512435	0.0127995
WDR34	protein_coding	3.5563	-0.30618	-0.85669	0.269611	0.00512435	0.0128115
AHRR	protein_coding	2.7004	0.31595	0.66941	0.163297	0.00512435	0.0136335
CTD-2510F5.4	antisense	0.0783	-0.51465	-1.15937	0.159808	0.00512435	0.0136354
PPM1G	protein_coding	6.8842	-0.35403	-0.49757	0.0422075	0.00513946	0.0115099
SLC23A3	protein_coding	0.0296	0.78454	1.16195	0.0531204	0.00514281	0.0121996
WDR4	protein_coding	2.5512	-0.60844	-0.63905	0.00982463	0.00515293	0.00639459
AP001053.11	NA	0.3019	1.1131	1.16943	0.0103041	0.00515293	0.00657596
PGP	protein_coding	3.4069	-0.70174	-0.58204	0.00243772	0.00516312	0.00264634
ENTPD4	protein_coding	5.2351	0.308	0.44904	0.0486655	0.00516312	0.0119918
TAF15	protein_coding	6.2707	-0.37985	-0.47216	0.0246285	0.0051633	0.00975112
SERBP1P6	processed_pseudogene	3.48	-0.72532	-0.67694	0.00506875	0.0051753	0.00440171
EIF2B3	protein_coding	4.8065	-0.51089	-0.57922	0.0150814	0.00518335	0.00792355
SLC25A17	protein_coding	4.5443	-0.19231	-0.49779	0.242159	0.00518869	0.0132424
SPDYE1	protein_coding	1.8748	0.72968	0.80775	0.0136838	0.00519877	0.0075904
ARSD	protein_coding	2.6576	0.44939	0.80467	0.101604	0.00519877	0.0136862
EXOC6	protein_coding	6.6219	-0.54104	-0.51139	0.00587954	0.00520466	0.00483537
SSH3	protein_coding	1.2599	0.8165	0.84451	0.0095061	0.00520772	0.00634427
LYRM2	protein_coding	4.6708	-0.43352	-0.50761	0.0176727	0.00520772	0.00858225
CCDC111	NA	2.0295	-0.31661	-0.70835	0.16797	0.00520772	0.0138294
CCDC62	protein_coding	-0.312	0.95067	1.259	0.0338837	0.00521112	0.0109336
STAG2	protein_coding	5.9967	-0.08949	-0.46729	0.586505	0.00522419	0.00989618
TUBBP1	transcribed_processed_pseudogene	5.8655	-0.27618	-0.59726	0.167643	0.00523242	0.013877
PDCD4	protein_coding	4.8148	0.15251	0.4786	0.350115	0.00524024	0.0122927
RP11-756P10.3	processed_pseudogene	3.7712	-0.37091	-0.5602	0.0524132	0.00524177	0.0123703
RHOB	protein_coding	7.5621	-0.02064	0.43885	0.903018	0.00524716	0.00511914
ABCC5	protein_coding	4.3759	0.3859	0.47732	0.0241143	0.00524716	0.0097898
RP11-1006G14.4	sense_overlapping	1.2306	0.60004	0.88006	0.0508574	0.00524716	0.0122927
DNAJC19P9	processed_pseudogene	4.8719	-0.56338	-0.62085	0.0131978	0.00524772	0.00752888
NSG1	NA	-0.0901	0.67533	1.10315	0.0775631	0.0052562	0.0134195
RP11-478C1.8	processed_pseudogene	-0.8247	1.21481	1.73988	0.0486655	0.00525807	0.0121949
PDGFB	protein_coding	5.5591	0.15377	0.55059	0.418721	0.00527209	0.0116797
LDHBP2	processed_pseudogene	4.6701	-0.78304	-0.5881	0.00137237	0.00530335	0.0016821
ZSWIM4	protein_coding	2.183	0.42309	0.79656	0.120521	0.00531804	0.0141254
ADCY10P1	transcribed_unprocessed_pseudogene	1.6577	0.19797	0.77283	0.469737	0.00532388	0.0112704
ABCC1	protein_coding	6.2301	0.39105	0.47846	0.0237316	0.00534453	0.00983475
ELK3	protein_coding	7.0239	-0.13321	-0.39288	0.318577	0.00534724	0.012908
ETV4	protein_coding	2.9925	-0.35607	-0.65724	0.102439	0.00534883	0.0140601
ANKDD1B	protein_coding	-0.1795	0.71483	1.07924	0.0582789	0.00538086	0.0129673
SNRPEP4	processed_pseudogene	3.5752	-0.45319	-0.58215	0.027404	0.00538854	0.0104114
AC083899.3	unprocessed_pseudogene	4.752	-0.24061	-0.44891	0.111059	0.00544252	0.0143459
CUL9	protein_coding	3.6019	0.65773	0.70718	0.0122288	0.00544866	0.00736006
LAMB1	protein_coding	9.2725	0.24296	0.37711	0.0640285	0.00544866	0.0133293
ZNF517	protein_coding	0.7104	0.41018	0.92002	0.19503	0.00544866	0.0142876
C17orf62	protein_coding	3.3817	0.66635	0.6973	0.0106317	0.00544955	0.00688802
PCNT	protein_coding	5.5004	-0.04725	-0.45717	0.783231	0.005465	0.0083274
GPATCH11	protein_coding	3.9585	-0.16895	-0.60303	0.404138	0.00546638	0.012228
MED12	protein_coding	5.0271	0.37701	0.44066	0.0190235	0.00548191	0.0091455
AC007362.3	antisense	1.2051	0.77482	1.03812	0.0360385	0.00548191	0.0115636
MARS2	protein_coding	2.9433	-0.26498	-0.63078	0.202206	0.00548191	0.0143417
EPRS	protein_coding	7.7333	0.0178	-0.4115	0.911242	0.00549836	0.0054082
ZNF724P	protein_coding	2.246	-0.30425	-0.87326	0.283934	0.00551965	0.0136862
KLHL22	protein_coding	2.2965	0.52845	0.70937	0.0360844	0.00553271	0.0116203
ANKRA2	protein_coding	3.0438	1.14924	0.70921	0.00031716	0.00553775	0.00042964
SRSF2	protein_coding	7.6454	-0.81257	-0.49488	0.00033078	0.00553775	0.00047018
LTBP2	protein_coding	8.2716	-0.35936	0.41772	0.0193879	0.00555079	0.00018337
HNRNPKP4	processed_pseudogene	5.9134	-0.43182	-0.43619	0.00909089	0.00555358	0.00639459
NIPA2	protein_coding	6.0575	-0.42184	-0.44029	0.0108639	0.0055672	0.00703694
TRIM3	protein_coding	2.704	0.5554	0.62925	0.0162476	0.0055672	0.00858231
CYB5B	protein_coding	6.7044	-0.57556	-0.46206	0.00225597	0.00558462	0.0025792
HNRNPA1P59	processed_pseudogene	0.0986	0.72446	1.14079	0.0696231	0.00558462	0.013837
GABARAPL1	protein_coding	4.8797	0.28084	0.52498	0.118995	0.00558462	0.0147551
FAM211B	NA	0.0783	0.85896	1.054	0.0243445	0.00560217	0.0102062
ADAMTS3	protein_coding	1.0303	-0.69542	-0.85366	0.0214363	0.00560284	0.00975112
PHYKPL	protein_coding	4.3402	0.35889	0.50382	0.0440102	0.00560537	0.0124216
LINC00910	lincRNA	1.3599	1.1787	0.91179	0.00158336	0.00560654	0.0019391
METTL4	protein_coding	3.827	-0.28654	-0.59173	0.147207	0.00560654	0.0149068
DHX15	protein_coding	7.3441	-0.34037	-0.43917	0.0312315	0.0056199	0.0112259
RP11-244H3.1	processed_transcript	0.0337	0.45884	1.11968	0.240004	0.00566521	0.0144601
POMP	protein_coding	6.7036	-0.30031	-0.44482	0.0547625	0.00567147	0.0133058
RP11-677M14.2	antisense	-0.2154	0.61203	1.29547	0.176964	0.0056719	0.0149647
LCORL	protein_coding	3.1971	-0.31302	-0.6695	0.159315	0.00567579	0.015028
TWISTNB	protein_coding	4.5801	-0.1257	-0.46999	0.433643	0.0056891	0.0123824
HSP90B1	protein_coding	10.3075	-0.39093	-0.45057	0.0188068	0.0057115	0.00930595
HNRNPKP2	processed_pseudogene	3.961	-0.45762	-0.4979	0.0130225	0.00571715	0.00780475
PPIH	protein_coding	3.8285	-0.44208	-0.6856	0.0598741	0.00571895	0.0137055
ABAT	protein_coding	-0.0604	0.48555	1.29935	0.289443	0.00572021	0.0141185
PSPC1	protein_coding	5.5617	-0.34393	-0.4963	0.0485911	0.00572526	0.0129949
FHOD1	protein_coding	4.3155	0.11778	0.5284	0.53541	0.00572629	0.0113643
FBXL18	protein_coding	2.4134	0.78676	0.68127	0.00341899	0.00573081	0.0035702
BTBD19	protein_coding	3.8404	0.43794	0.6732	0.063371	0.00573081	0.013877
LYRM7	protein_coding	3.9733	-0.22765	-0.62412	0.274615	0.00573918	0.0143501
SH3GL1P1	transcribed_processed_pseudogene	-0.4682	0.97226	1.54339	0.0744517	0.00576371	0.0143963
ARMC1	protein_coding	5.0262	-0.24847	-0.4904	0.134966	0.00577376	0.0153014
CERS6	protein_coding	4.0095	-0.1408	-0.51305	0.418769	0.00579188	0.0127995
ANP32AP1	transcribed_processed_pseudogene	1.6742	-0.75636	-0.94499	0.0251313	0.00579942	0.0106064
RGL1	protein_coding	5.3195	0.09744	0.44367	0.541458	0.00580389	0.0114387
RPE	protein_coding	4.903	-0.25879	-0.45292	0.0950903	0.00582253	0.0150241
C1GALT1C1	protein_coding	4.0326	-0.60603	-0.58961	0.0073006	0.00583239	0.00578396
DCAF5	protein_coding	5.63	0.26242	0.40745	0.0661836	0.00583239	0.014244
ANAPC1	protein_coding	6.3393	-0.18911	-0.40544	0.173303	0.00583239	0.015381
DNMT3B	protein_coding	2.2817	-0.27913	-0.61898	0.174247	0.00583239	0.015381
AC108488.3	NA	1.1535	-0.48437	-0.85253	0.0860788	0.00585566	0.0149437
DMPK	protein_coding	1.2635	0.85062	0.96911	0.0176526	0.00586795	0.00921318
RSRC1	protein_coding	3.0923	-0.11118	-0.57519	0.580406	0.00586795	0.0111788
FUBP1	protein_coding	7.2561	-0.21301	-0.39822	0.12163	0.00586795	0.015435
STK39	protein_coding	4.5542	-0.45506	-0.45159	0.00836232	0.00588988	0.00627037
KIAA0195	protein_coding	3.8982	0.57647	0.54637	0.00635099	0.00589979	0.00538376
LPP	protein_coding	8.0066	0.13396	0.42406	0.364518	0.00591328	0.0137296
HIST1H2BN	protein_coding	-0.2652	-0.85514	-1.17628	0.0347276	0.00591406	0.0120339
RNF213	protein_coding	7.5832	0.39807	0.42291	0.0128421	0.00592133	0.00789626
PGAP3	protein_coding	0.7143	0.75866	0.9357	0.026174	0.00592386	0.0109326
SPINT1	protein_coding	1.0036	0.86851	0.81201	0.00559066	0.00592634	0.00499045
GPR162	protein_coding	1.345	0.13043	0.71268	0.62329	0.00592969	0.01085
AC016734.2	processed_pseudogene	4.0495	-0.49051	-0.5084	0.0105804	0.00593162	0.00714677
ALDH1B1	protein_coding	4.2847	-0.38937	-0.52648	0.036942	0.00593634	0.012325
C3orf14	protein_coding	3.2217	-0.46432	-0.60301	0.0307756	0.00593656	0.0115953
RAD51C	protein_coding	5.1211	-0.33768	-0.5324	0.0676219	0.00593656	0.0145124
DENND3	protein_coding	5.2215	0.25247	0.50494	0.148294	0.00594366	0.0157633
CWC27	protein_coding	5.1496	-0.10232	-0.47157	0.539953	0.00595337	0.0117645
RP11-512F24.1	processed_pseudogene	2.9102	-0.58076	-0.63983	0.0141711	0.00596698	0.00837812
SPPL2B	protein_coding	2.0265	0.59765	0.75013	0.0285892	0.00596698	0.0113009
TSC22D4	protein_coding	1.8838	0.40739	0.72366	0.106606	0.00601141	0.0156726
C8orf44	protein_coding	1.3785	0.16359	0.82493	0.595783	0.00604776	0.0113009
RP11-460C6.1	NA	0.5052	-0.16648	-0.86002	0.562106	0.00605113	0.0116991
BMS1	protein_coding	6.851	-0.15496	-0.38923	0.248799	0.00605328	0.015381
FANCL	protein_coding	3.1241	-0.4607	-0.6201	0.0360132	0.00606311	0.0123866
SNRPD3	protein_coding	5.6746	-0.5714	-0.52	0.00533876	0.00607694	0.00487043
NUP85	protein_coding	5.2304	-0.5281	-0.63845	0.0235081	0.00607978	0.0106627
SCN3B	protein_coding	0.5572	1.07162	1.19908	0.0166103	0.00609403	0.00916726
PNO1	protein_coding	4.6205	-0.53932	-0.52643	0.00789234	0.00609779	0.00613849
MKNK2	protein_coding	4.3857	0.67621	0.47663	0.00098154	0.00611829	0.00129878
HNRNPA3P6	processed_pseudogene	5.1577	-0.50434	-0.51443	0.0103021	0.00612039	0.00714677
TPD52	protein_coding	2.0119	-0.45045	-0.67157	0.0522221	0.00613227	0.0139941
LTV1	protein_coding	5.2855	0.00435	-0.59031	0.985616	0.00613332	0.00679745
ERH	protein_coding	3.6132	-0.77871	-0.74293	0.00685315	0.00614603	0.00572647
RP5-894A10.2	antisense	0.9925	0.11203	0.85007	0.737257	0.00614905	0.00991867
RP11-575G13.2	processed_pseudogene	1.023	-0.43485	-0.90958	0.148767	0.00615862	0.016227
PP13439	NA	2.2899	0.09672	0.72718	0.732164	0.00617739	0.0100081
LIMD2	protein_coding	2.1203	0.44442	0.72078	0.0801145	0.00622138	0.0155281
CTD-2574D22.4	sense_intronic	1.6889	0.67815	0.84587	0.0286636	0.00623108	0.0116203
NUP62	protein_coding	4.9203	-0.28221	-0.46741	0.0818852	0.00624881	0.0156698
CTD-2373H9.5	antisense	0.0047	0.47211	1.40074	0.35179	0.00626387	0.0146861
AHDC1	protein_coding	1.9028	0.41228	0.84793	0.165846	0.00626725	0.0164405
FAM72B	protein_coding	0.7817	-0.46319	-1.1677	0.211522	0.00627	0.0162248
PRPF4	protein_coding	4.9009	-0.22994	-0.46624	0.150521	0.00628208	0.016506
YBX3	protein_coding	8.0207	0.72538	0.41395	0.00024646	0.00629033	0.00033694
ERBB2	protein_coding	2.7639	0.65667	0.58276	0.00441394	0.00630032	0.00440032
DESI2	protein_coding	5.8869	-0.3028	-0.44559	0.0554896	0.00630095	0.0145293
APOBEC4	protein_coding	0.663	1.14829	0.98851	0.0035286	0.00630098	0.00377293
METTL7A	protein_coding	1.8392	-0.76524	-0.7906	0.0103088	0.00630098	0.00723757
TMEM127	protein_coding	4.8252	0.41765	0.45944	0.0156812	0.00630098	0.00908527
WNT2B	protein_coding	2.3844	0.2022	0.71845	0.432301	0.00630098	0.0137926
LDHAP7	processed_pseudogene	0.1433	-0.62738	-0.94544	0.0508405	0.00630098	0.014221
SLC16A1	protein_coding	6.2357	-0.15854	-0.39312	0.244475	0.00630098	0.0160327
CYP2S1	protein_coding	1.4845	1.00166	0.77207	0.00179528	0.0063056	0.00220719
RP11-295P9.3	processed_transcript	4.3248	0.4698	0.55337	0.0218188	0.0063056	0.0106064
SRBD1	protein_coding	4.2057	-0.11558	-0.47914	0.492573	0.0063056	0.0130882
PSMA3	protein_coding	7.1832	-0.51312	-0.5029	0.00877209	0.00630612	0.00671349
LDHB	protein_coding	8.9684	-0.62981	-0.51401	0.00292227	0.00631975	0.00323384
ZNF22	protein_coding	4.5402	-0.5283	-0.68619	0.0325652	0.00631975	0.0123154
DNAJC9	protein_coding	1.87	-0.61257	-0.69042	0.0160838	0.00632587	0.00921381
PITPNM1	protein_coding	1.0772	0.89939	0.83641	0.00598915	0.00634185	0.00534921
[truncated: 1,807 more rows]
