# Supplementary material for: Central role of the p53 pathway in the noncoding-RNA response to oxidative stress
Source: Aging (Albany NY). 2017 Dec 12;9(12):2559–86. doi: 10.18632/aging.101341 (PMC5764393; doi:10.18632/aging.101341)
Supplement: Supplementary file 4 [file aging-09-2559-s004.xlsx]

## Sheet: Fuschi et al. Dataset S3
Dataset S3. Commonly modulated protein-coding genes in HUVEC treated with H2O2 for 16 or 36 hrs
Gene name	Gene biotype	log2 fold change H2O2 16 hrs	log2 fold change H2O2 36hrs	p.value.adj.H2O2 16 hrs	p.value.adj.H2O2 36 hrs	F.p.value.adj
CDKN1A	protein_coding	1.87259	1.45022	1.1e-07	5.3e-07	2.7e-07
GDF15	protein_coding	2.4838	1.27078	1.1e-07	8.09e-06	2.7e-07
MDM2	protein_coding	2.41435	1.75938	1.1e-07	7e-07	2.7e-07
ASPM	protein_coding	-1.025	-2.11581	8.65e-05	1.6e-07	3.2e-07
CYFIP2	protein_coding	1.73701	1.45725	1.9e-07	5.9e-07	3.2e-07
HIST1H3B	protein_coding	-1.36417	-2.98336	3.91e-05	1.6e-07	3.2e-07
HMOX1	protein_coding	2.57241	1.54201	1.3e-07	5.28e-06	3.2e-07
VWCE	protein_coding	2.76727	2.51837	2.8e-07	5.1e-07	3.2e-07
CENPE	protein_coding	-0.98379	-2.31609	0.00016114	1.6e-07	3.2e-07
DEK	protein_coding	-0.87859	-1.82953	8.65e-05	1.6e-07	3.2e-07
SMC4	protein_coding	-0.76163	-1.83917	0.00024646	1.6e-07	3.2e-07
KIF20B	protein_coding	-1.04712	-2.13373	7.6e-05	1.8e-07	4e-07
HIST1H1E	protein_coding	-0.63607	-2.53938	0.00715177	2.7e-07	4.1e-07
HIST1H1D	protein_coding	-1.78848	-3.16039	3e-05	3.6e-07	7.2e-07
HIST1H3C	protein_coding	-1.92312	-3.22966	1.21e-05	4e-07	8e-07
CASC5	protein_coding	-0.86637	-1.93884	0.00029608	3.9e-07	9.1e-07
BTG2	protein_coding	1.80178	1.50155	1.26e-06	1.92e-06	1.02e-06
CKAP2	protein_coding	-0.81325	-1.55195	0.00011212	4e-07	1.03e-06
KIF11	protein_coding	-0.85689	-1.86435	0.00027471	4e-07	1.06e-06
HIST1H2AI	protein_coding	-1.74703	-2.88683	2.55e-05	5.1e-07	1.17e-06
HIST1H2BC	protein_coding	-1.43844	-2.31321	3.36e-05	5.1e-07	1.17e-06
PLK4	protein_coding	-0.89001	-1.91724	0.00024646	5e-07	1.23e-06
MCM6	protein_coding	-1.70398	-1.84141	4.93e-06	9.5e-07	1.29e-06
MKI67	protein_coding	-1.30293	-1.99667	4.15e-05	5.1e-07	1.29e-06
TTK	protein_coding	-0.78217	-1.96708	0.00081194	5.1e-07	1.38e-06
HIST1H2AL	protein_coding	-1.64065	-3.13426	8.76e-05	5.3e-07	1.59e-06
HIST1H2BF	protein_coding	-1.85485	-3.05786	4.41e-05	6.1e-07	1.59e-06
HIST1H3J	protein_coding	-2.1314	-3.09094	1.93e-05	7.3e-07	1.59e-06
SKA3	protein_coding	-1.10982	-2.17714	0.00016121	5.3e-07	1.59e-06
UHRF1	protein_coding	-1.2774	-1.6074	1.27e-05	7.4e-07	1.59e-06
KIF15	protein_coding	-1.19374	-2.3386	0.0001703	5.6e-07	1.66e-06
USP1	protein_coding	-1.09815	-1.74443	5e-05	6.3e-07	1.69e-06
HIST1H2AG	protein_coding	-1.66497	-2.7794	5.01e-05	6.6e-07	1.81e-06
CCNA2	protein_coding	-1.02507	-1.82235	0.00012579	6.6e-07	2.03e-06
FAS	protein_coding	2.35954	1.60633	2.32e-06	1.8e-05	2.03e-06
HIST1H2AJ	protein_coding	-1.69489	-3.19621	6.09e-05	7.3e-07	2.21e-06
ACAT2	protein_coding	-1.63616	-0.52793	2.51e-06	0.00458046	2.26e-06
CPM	protein_coding	3.69598	3.26285	4.78e-06	3.87e-06	2.44e-06
SPATA18	protein_coding	1.31851	1.75872	3.72e-05	1e-06	2.44e-06
CENPF	protein_coding	-0.8825	-2.05345	0.00126856	7.3e-07	2.44e-06
FBXO5	protein_coding	-1.06089	-2.15749	0.0003232	7.7e-07	2.69e-06
CLSPN	protein_coding	-1.22434	-2.00039	9.95e-05	9.6e-07	2.79e-06
HIST1H1A	protein_coding	-1.95391	-2.95362	4e-05	1.08e-06	2.79e-06
LMNB1	protein_coding	-1.0484	-1.59729	7.03e-05	1e-06	2.79e-06
SGOL2	protein_coding	-1.02046	-2.06248	0.00033078	8.5e-07	2.79e-06
WDR76	protein_coding	-1.52296	-1.80308	1.78e-05	1.67e-06	2.79e-06
ALDH1L2	protein_coding	1.76321	0.46262	4.09e-06	0.0281718	2.89e-06
CDC6	protein_coding	-1.57633	-1.94806	2.55e-05	1.62e-06	2.9e-06
E2F8	protein_coding	-1.15364	-1.84222	8.65e-05	1.01e-06	2.9e-06
ANLN	protein_coding	-1.22447	-1.89638	9.95e-05	1.02e-06	2.92e-06
SESN2	protein_coding	1.76568	1.26011	4.02e-06	2.03e-05	2.92e-06
HIST1H1B	protein_coding	-1.78573	-3.19955	0.00011157	1.19e-06	3.57e-06
CEP55	protein_coding	-0.93912	-1.65214	0.00022173	1.08e-06	3.57e-06
ESCO2	protein_coding	-1.30035	-2.11191	0.00011061	1.26e-06	3.79e-06
HIST1H1C	protein_coding	-0.79451	-2.2057	0.00328867	1.23e-06	3.99e-06
PHGDH	protein_coding	1.32391	-0.73228	0.00010605	0.0064186	4.12e-06
CMBL	protein_coding	1.24715	1.12689	8.96e-06	5.99e-06	4.16e-06
HIST1H2BM	protein_coding	-2.28678	-3.1511	3.19e-05	2.06e-06	4.23e-06
PTGS2	protein_coding	1.22708	0.88997	4.96e-06	2.32e-05	4.51e-06
PLK2	protein_coding	1.00694	1.03429	1.77e-05	3.66e-06	4.52e-06
HIST1H3I	protein_coding	-1.5157	-2.27571	7.94e-05	1.78e-06	4.72e-06
HIST2H2BF	protein_coding	-1.83808	-2.99438	7.33e-05	1.79e-06	4.72e-06
HMGB2	protein_coding	-1.12996	-2.23954	0.00063237	1.44e-06	4.72e-06
SMC2	protein_coding	-0.79517	-1.63348	0.0009563	1.44e-06	4.72e-06
MCM10	protein_coding	-1.10778	-1.90413	0.00020598	1.62e-06	4.87e-06
FOXM1	protein_coding	-0.88712	-1.40418	0.00012902	1.7e-06	4.87e-06
RFC3	protein_coding	-0.65136	-1.71238	0.00345551	1.62e-06	4.87e-06
SLC6A9	protein_coding	4.10829	1.58173	4.96e-06	0.00509102	4.92e-06
DUT	protein_coding	-1.46356	-1.47742	1.78e-05	4.83e-06	4.97e-06
ERCC6L	protein_coding	-1.09072	-1.76983	0.00014369	1.71e-06	4.97e-06
HIST1H4B	protein_coding	-2.12623	-3.14756	4.8e-05	2.19e-06	4.97e-06
GADD45A	protein_coding	1.39326	0.52424	4.96e-06	0.00433204	4.97e-06
BRCA2	protein_coding	-0.69684	-1.81449	0.00360854	1.71e-06	5.19e-06
RRM2	protein_coding	-1.40027	-2.1446	0.00014341	1.8e-06	5.19e-06
CDKN2C	protein_coding	-1.58089	-2.01938	4e-05	2.8e-06	5.22e-06
FAM212B	protein_coding	1.45526	1.30894	1.27e-05	8.57e-06	5.22e-06
CYTL1	protein_coding	0.65714	1.91	0.0127309	1.83e-06	5.22e-06
MCM8	protein_coding	-0.69316	-1.59352	0.00182223	1.71e-06	5.36e-06
MIS18BP1	protein_coding	-0.65065	-1.42982	0.0014355	1.71e-06	5.36e-06
ASF1B	protein_coding	-1.30539	-1.8917	8.65e-05	2.19e-06	5.79e-06
RACGAP1	protein_coding	-1.03527	-1.91773	0.00041466	1.8e-06	5.79e-06
ATAD2	protein_coding	-1.03205	-1.71268	0.00025838	1.89e-06	5.82e-06
BRCA1	protein_coding	-0.45946	-1.64813	0.0259719	2.15e-06	5.83e-06
CKAP2L	protein_coding	-0.94206	-2.0918	0.00138226	1.82e-06	5.83e-06
DEPDC1B	protein_coding	-1.40916	-2.12282	0.00011157	2.19e-06	5.95e-06
MCM5	protein_coding	-1.04512	-1.54164	0.00011212	2.22e-06	6.15e-06
NDC1	protein_coding	-0.6538	-1.35306	0.00117374	1.89e-06	6.15e-06
GPC1	protein_coding	1.84154	1.25212	8.09e-06	7.2e-05	6.4e-06
ARHGAP11A	protein_coding	-0.77978	-1.66012	0.00154	1.96e-06	6.44e-06
NDC80	protein_coding	-0.98839	-2.12508	0.00119103	1.98e-06	6.55e-06
KIF18A	protein_coding	-0.83712	-1.93265	0.00211797	2.06e-06	6.84e-06
POLA1	protein_coding	-0.9355	-1.34479	0.00011477	2.65e-06	6.94e-06
CDK1	protein_coding	-0.81431	-1.78497	0.00158468	2.12e-06	7.05e-06
SKA1	protein_coding	-0.72389	-1.95929	0.00595442	2.19e-06	7.05e-06
SYNE2	protein_coding	-0.80559	-1.21851	0.00018057	2.39e-06	7.05e-06
TOP2A	protein_coding	-0.85965	-1.6644	0.00098154	2.09e-06	7.05e-06
GAL3ST4	protein_coding	1.75514	1.71444	2.55e-05	8.26e-06	7.23e-06
HIST1H2BH	protein_coding	-1.74074	-2.75208	0.00010686	3.27e-06	8.02e-06
CDCA7	protein_coding	-1.25667	-1.31805	3.36e-05	7.42e-06	8.35e-06
STEAP1	protein_coding	-1.08546	-1.27402	5e-05	5.13e-06	8.59e-06
DNA2	protein_coding	-0.94873	-1.59982	0.00033078	2.8e-06	9.1e-06
DTL	protein_coding	-0.87768	-2.02333	0.00268733	2.67e-06	9.19e-06
DEPDC1	protein_coding	-1.15129	-1.62301	0.00011902	3.71e-06	9.29e-06
FAM111B	protein_coding	-1.87198	-3.10153	0.0001703	3.36e-06	9.36e-06
NUF2	protein_coding	-1.06236	-2.00615	0.00072828	2.8e-06	9.6e-06
NCAPH	protein_coding	-0.89913	-1.70621	0.00081194	2.8e-06	9.6e-06
IGFBP3	protein_coding	-1.40603	-1.26225	2.47e-05	1.64e-05	9.65e-06
TNFRSF10C	protein_coding	1.37396	1.35228	3.19e-05	1.05e-05	9.65e-06
POLQ	protein_coding	-0.7729	-1.6332	0.00166924	2.8e-06	9.65e-06
HIST1H4H	protein_coding	-1.73185	-2.43924	9.95e-05	4.63e-06	1.01e-05
GAS2L3	protein_coding	-0.84175	-1.30123	0.00026061	3.51e-06	1.01e-05
NCAPG	protein_coding	-1.05551	-2.06417	0.00119103	3.06e-06	1.03e-05
KIF23	protein_coding	-1.0405	-1.79636	0.00057862	3.34e-06	1.07e-05
TP53INP1	protein_coding	1.09466	1.19963	5e-05	7.73e-06	1.07e-05
ZNF367	protein_coding	-1.56132	-2.01423	7.94e-05	5.56e-06	1.07e-05
CDC7	protein_coding	-0.91637	-1.51796	0.00037389	3.72e-06	1.11e-05
E2F1	protein_coding	-1.45789	-2.02269	9.95e-05	5.27e-06	1.11e-05
FABP4	protein_coding	-2.77764	-1.76067	1.5e-05	0.00013078	1.11e-05
NCAPD3	protein_coding	-0.80247	-1.27246	0.00032788	3.72e-06	1.11e-05
CEP152	protein_coding	-0.46172	-1.39765	0.0167642	3.75e-06	1.12e-05
MEOX2	protein_coding	-1.40764	-1.28952	3e-05	1.75e-05	1.13e-05
E2F2	protein_coding	-1.77001	-2.14399	6.38e-05	7.7e-06	1.17e-05
SLFN11	protein_coding	-1.09924	-0.69094	1.5e-05	0.00019887	1.18e-05
KIF20A	protein_coding	-1.4531	-1.85706	0.00010605	5.64e-06	1.22e-05
MYBL2	protein_coding	-0.91055	-1.57897	0.00056844	3.79e-06	1.22e-05
RBBP8	protein_coding	-0.79197	-1.50566	0.00098173	3.73e-06	1.24e-05
STIL	protein_coding	-0.6963	-1.42818	0.00179745	3.72e-06	1.25e-05
MND1	protein_coding	-0.84088	-1.97741	0.00318262	3.83e-06	1.31e-05
NUSAP1	protein_coding	-0.96389	-1.75031	0.00089191	3.88e-06	1.31e-05
SULF2	protein_coding	0.98853	1.30602	0.00014341	5.52e-06	1.31e-05
PLXNB2	protein_coding	1.21374	1.18477	4e-05	1.49e-05	1.32e-05
RRM1	protein_coding	-0.9617	-1.42582	0.00027471	4.83e-06	1.33e-05
SPIN4	protein_coding	-0.94182	-1.4619	0.00030127	4.76e-06	1.33e-05
GINS2	protein_coding	-1.76466	-2.05469	7.09e-05	8.68e-06	1.33e-05
KIF14	protein_coding	-0.84571	-1.74409	0.00182223	4.21e-06	1.43e-05
BUB1B	protein_coding	-1.05116	-1.59936	0.0003232	5.21e-06	1.51e-05
CDCA2	protein_coding	-0.93671	-1.80786	0.00130696	4.64e-06	1.56e-05
DBF4	protein_coding	-0.93007	-1.48612	0.00039329	5.21e-06	1.56e-05
HJURP	protein_coding	-0.88287	-1.74536	0.00166185	4.64e-06	1.56e-05
ECT2	protein_coding	-0.8268	-1.46596	0.00098154	5.01e-06	1.66e-05
FEN1	protein_coding	-1.39805	-1.76099	0.00011867	8.21e-06	1.68e-05
HELLS	protein_coding	-1.07972	-1.31895	0.00011157	9.15e-06	1.8e-05
XPC	protein_coding	1.16002	0.86832	2.78e-05	9.06e-05	1.8e-05
ATAD5	protein_coding	-0.65894	-1.33799	0.00207898	5.21e-06	1.81e-05
HES2	protein_coding	1.17961	1.37426	9.95e-05	1.02e-05	1.81e-05
PTTG1	protein_coding	-0.88347	-1.29511	0.00032136	6.42e-06	1.81e-05
PHLDA3	protein_coding	1.48991	1.34499	4.03e-05	3.16e-05	1.91e-05
KIAA1524	protein_coding	-0.92268	-1.63377	0.00097205	5.64e-06	1.91e-05
RFC4	protein_coding	-0.82889	-1.59751	0.0014638	5.52e-06	1.91e-05
RTKN2	protein_coding	-1.00061	-1.81028	0.00087631	5.73e-06	1.92e-05
RAD51AP1	protein_coding	-1.06197	-2.17518	0.00204339	5.56e-06	1.94e-05
MSH2	protein_coding	-0.77173	-1.10074	0.00028245	7.42e-06	1.94e-05
HIST1H4L	protein_coding	-2.107	-3.00719	0.00014555	9.95e-06	2.14e-05
MAD2L1	protein_coding	-0.79743	-1.684	0.00270209	5.97e-06	2.14e-05
FIGNL1	protein_coding	-0.89051	-1.22837	0.00025052	8.4e-06	2.18e-05
ERV3-1	protein_coding	0.31964	1.0611	0.0493162	7.99e-06	2.23e-05
SMC3	protein_coding	-0.48924	-1.08358	0.00540301	6.49e-06	2.29e-05
EZH2	protein_coding	-0.75857	-1.12854	0.00039022	7.99e-06	2.3e-05
ZMAT3	protein_coding	0.81412	1.07645	0.00024374	9.26e-06	2.32e-05
PRC1	protein_coding	-1.19551	-1.60267	0.00024462	9.5e-06	2.38e-05
PBK	protein_coding	-1.09555	-1.92337	0.00096717	7.42e-06	2.41e-05
MCM2	protein_coding	-1.17221	-1.82013	0.00044285	8.25e-06	2.46e-05
MSH6	protein_coding	-0.88384	-0.85036	6.06e-05	2.79e-05	2.46e-05
CENPN	protein_coding	-0.81598	-1.33932	0.00074659	7.9e-06	2.48e-05
DNMT1	protein_coding	-0.65491	-0.91253	0.0003232	9.11e-06	2.48e-05
NDRG4	protein_coding	0.93044	1.0048	9.27e-05	1.74e-05	2.48e-05
TPX2	protein_coding	-0.94087	-1.53739	0.0008795	7.73e-06	2.48e-05
BARD1	protein_coding	-0.90423	-1.5848	0.00103308	7.73e-06	2.51e-05
HIST1H2BG	protein_coding	-2.09321	-2.86807	0.00011902	1.43e-05	2.51e-05
ULBP1	protein_coding	2.81881	0.97514	3.19e-05	0.0266375	2.53e-05
GTSE1	protein_coding	-0.88786	-1.53779	0.00099623	7.99e-06	2.58e-05
E2F7	protein_coding	0.62723	-0.37967	0.00082691	0.0134416	2.71e-05
CCNF	protein_coding	-0.76505	-1.36994	0.00130696	8.1e-06	2.73e-05
UBE2T	protein_coding	-1.18528	-1.64963	0.00030296	1.07e-05	2.73e-05
FAM101B	protein_coding	-1.14238	-0.50947	3.19e-05	0.00422169	2.9e-05
RRM2B	protein_coding	1.01144	0.82506	4.62e-05	8.74e-05	3e-05
DGKA	protein_coding	0.84927	0.97007	0.00013007	1.71e-05	3e-05
ORC1	protein_coding	-0.92187	-1.72336	0.00148605	8.68e-06	3.01e-05
JAG1	protein_coding	0.77263	0.92182	0.00016214	1.53e-05	3.02e-05
MCM4	protein_coding	-1.26287	-1.61292	0.00023216	1.39e-05	3.09e-05
TUBA1B	protein_coding	-0.82018	-1.00407	0.00020445	1.48e-05	3.11e-05
HIST2H2AA3	protein_coding	-1.30806	-2.20119	0.00057862	1.05e-05	3.13e-05
BUB1	protein_coding	-1.16691	-1.69703	0.0004603	1.11e-05	3.17e-05
CDKN3	protein_coding	-1.48909	-1.7676	0.00014369	1.82e-05	3.26e-05
BRIP1	protein_coding	-0.80332	-1.76225	0.0048422	9.26e-06	3.28e-05
C18orf54	protein_coding	-0.66455	-1.21604	0.00182101	9.5e-06	3.28e-05
ANKRD45	protein_coding	3.06525	3.17289	9.95e-05	2.74e-05	3.28e-05
ADM2	protein_coding	4.16835	2.14976	3.43e-05	0.00261536	3.32e-05
TICRR	protein_coding	-0.64767	-1.28053	0.00291175	9.75e-06	3.42e-05
UNG	protein_coding	-1.22883	-1.134	7.2e-05	5.31e-05	3.46e-05
WDHD1	protein_coding	-0.64702	-1.35998	0.00486434	9.94e-06	3.46e-05
PLA2G4C	protein_coding	0.97883	1.56405	0.00112521	1.08e-05	3.52e-05
HSPE1	protein_coding	-0.66302	-1.18382	0.00166625	1.07e-05	3.61e-05
FANCM	protein_coding	-0.66559	-1.16819	0.00154113	1.07e-05	3.62e-05
CACYBP	protein_coding	-0.74844	-1.08983	0.00054543	1.31e-05	3.68e-05
RTTN	protein_coding	-0.49618	-1.1714	0.00941327	1.07e-05	3.68e-05
ESPL1	protein_coding	-0.43413	-1.38168	0.0384801	1.24e-05	3.7e-05
FAM83D	protein_coding	-0.88463	-1.59275	0.00162517	1.1e-05	3.7e-05
MMS22L	protein_coding	-0.72737	-1.27746	0.00162517	1.12e-05	3.78e-05
CDC25A	protein_coding	-0.97327	-1.27962	0.00030127	1.68e-05	3.86e-05
TRIM59	protein_coding	-0.81832	-1.1094	0.00036692	1.54e-05	3.86e-05
FHL2	protein_coding	0.99346	0.56414	4e-05	0.00121433	3.92e-05
MELK	protein_coding	-0.87284	-1.61399	0.00236797	1.13e-05	3.92e-05
ANP32E	protein_coding	-0.8243	-1.26404	0.00085213	1.33e-05	4.02e-05
CDCA3	protein_coding	-1.21227	-1.76147	0.00049021	1.52e-05	4.07e-05
SKP2	protein_coding	-0.78581	-1.07249	0.0004086	1.58e-05	4.07e-05
PHF19	protein_coding	-0.82016	-1.19469	0.00057862	1.47e-05	4.08e-05
SLFN5	protein_coding	0.88006	0.66979	5.22e-05	0.0001827	4.08e-05
CEACAM1	protein_coding	2.26952	1.6448	4.88e-05	0.00029036	4.11e-05
HMGCS1	protein_coding	-0.94076	-0.30802	4.62e-05	0.0309992	4.11e-05
KNTC1	protein_coding	-0.69741	-1.26139	0.00214469	1.22e-05	4.11e-05
SGOL1	protein_coding	-0.70897	-1.68547	0.00935962	1.22e-05	4.11e-05
ZNF561	protein_coding	0.89483	0.98418	0.00014939	2.89e-05	4.21e-05
ATF3	protein_coding	1.86977	1.30234	4.8e-05	0.00039039	4.23e-05
BLM	protein_coding	-0.72821	-1.59021	0.00605484	1.25e-05	4.24e-05
PRIM1	protein_coding	-0.7852	-1.72726	0.00560278	1.29e-05	4.43e-05
ARHGAP11B	protein_coding	-0.57445	-1.3695	0.0110519	1.33e-05	4.46e-05
CENPJ	protein_coding	-0.49247	-1.18674	0.0124996	1.35e-05	4.46e-05
CHAF1B	protein_coding	-0.86057	-1.44554	0.00130378	1.43e-05	4.46e-05
FANCI	protein_coding	-0.87094	-1.36706	0.00102886	1.47e-05	4.46e-05
FAT1	protein_coding	1.03045	0.7772	5.67e-05	0.00023191	4.46e-05
CCNE2	protein_coding	-1.57126	-2.01897	0.00026302	2.3e-05	4.46e-05
HIST1H3F	protein_coding	-1.88248	-3.30577	0.00065868	1.63e-05	4.46e-05
HIST2H2AA4	protein_coding	-1.44899	-2.2858	0.0006163	1.65e-05	4.46e-05
VRK1	protein_coding	-0.86421	-1.41262	0.0012018	1.43e-05	4.46e-05
RAD18	protein_coding	-0.51455	-1.12044	0.00712562	1.33e-05	4.49e-05
MCM3	protein_coding	-0.97886	-1.21867	0.00029969	2.23e-05	4.5e-05
POLD3	protein_coding	-0.72771	-1.28348	0.00193754	1.41e-05	4.56e-05
FDFT1	protein_coding	-1.00933	-0.42414	4.62e-05	0.00924818	4.57e-05
GOLGA8B	protein_coding	0.61141	0.95234	0.00121047	1.56e-05	4.87e-05
HMGN2	protein_coding	-0.93474	-1.25121	0.00042896	2.09e-05	5e-05
ZWINT	protein_coding	-1.13359	-1.90452	0.00138226	1.57e-05	5.02e-05
HOPX	protein_coding	-1.25717	-1.09513	8.65e-05	0.00010992	5.27e-05
HIST1H2AK	protein_coding	-0.84201	-1.7842	0.00361524	1.53e-05	5.32e-05
LPAR1	protein_coding	-1.06621	-0.79856	6.7e-05	0.00025791	5.32e-05
MZF1	protein_coding	1.1117	1.37159	0.00033137	2.57e-05	5.32e-05
FDXR	protein_coding	1.62684	1.15978	6.06e-05	0.00040904	5.37e-05
EXO1	protein_coding	-0.75008	-1.85623	0.0130726	1.6e-05	5.51e-05
SASS6	protein_coding	-0.42758	-1.35452	0.0456693	1.8e-05	5.51e-05
CENPI	protein_coding	-1.0115	-1.31082	0.00039312	2.53e-05	5.54e-05
GINS1	protein_coding	-1.09178	-1.52972	0.00057862	2.19e-05	5.59e-05
CENPQ	protein_coding	-0.53526	-1.76967	0.0429883	1.82e-05	5.62e-05
DHFR	protein_coding	-1.39827	-1.56789	0.00021301	3.9e-05	5.62e-05
XRCC2	protein_coding	-0.87105	-1.4449	0.00143784	1.77e-05	5.62e-05
KIF24	protein_coding	-0.47129	-1.49431	0.0447621	1.85e-05	5.66e-05
CENPA	protein_coding	-1.14663	-1.93771	0.00149587	1.8e-05	5.75e-05
GSG2	protein_coding	-0.67478	-1.59082	0.0100501	1.67e-05	5.8e-05
HIST2H2AB	protein_coding	-1.11645	-2.19846	0.00218313	1.74e-05	5.8e-05
ATP6V0A1	protein_coding	0.78832	0.77324	0.00013007	6.78e-05	5.84e-05
ACTA2	protein_coding	2.07148	1.88808	0.00010605	9.75e-05	5.84e-05
SLC40A1	protein_coding	1.42705	1.43587	0.00014341	6.37e-05	6.06e-05
CES2	protein_coding	1.15645	0.99487	9.51e-05	0.00013947	6.12e-05
LDHA	protein_coding	-0.81906	-0.76947	0.00011902	8.44e-05	6.17e-05
EXOSC8	protein_coding	-0.72879	-1.08873	0.00097104	2.19e-05	6.22e-05
NEK10	protein_coding	0.69224	1.65515	0.0195595	1.84e-05	6.22e-05
CDC45	protein_coding	-1.05701	-1.80692	0.00182271	1.99e-05	6.43e-05
AURKA	protein_coding	-0.94475	-1.52385	0.00154113	2.09e-05	6.61e-05
KIF4A	protein_coding	-1.01784	-1.50255	0.00097686	2.32e-05	6.67e-05
TMPO	protein_coding	-0.90588	-1.3477	0.00098234	2.3e-05	6.67e-05
MTHFD1	protein_coding	-0.76918	-0.95536	0.00039437	3.4e-05	7.03e-05
GEN1	protein_coding	-0.50271	-1.1378	0.011186	2.03e-05	7.19e-05
AMD1	protein_coding	-0.78884	-0.87988	0.00026263	5.04e-05	7.34e-05
PLTP	protein_coding	1.04376	0.90595	0.00010837	0.00015502	7.34e-05
LAPTM5	protein_coding	0.62953	0.84844	0.00072946	2.85e-05	7.36e-05
NEIL3	protein_coding	-0.88658	-1.75096	0.00446173	2.09e-05	7.36e-05
BEX2	protein_coding	2.02121	0.92522	6.7e-05	0.0101611	7.4e-05
GMNN	protein_coding	-1.09438	-1.63714	0.00098154	2.65e-05	7.42e-05
DCLRE1B	protein_coding	-0.68307	-1.20726	0.0026994	2.21e-05	7.44e-05
CENPK	protein_coding	-0.80996	-1.61022	0.00501182	2.14e-05	7.49e-05
FAM64A	protein_coding	-1.04413	-1.90067	0.00236908	2.26e-05	7.49e-05
FAM111A	protein_coding	-0.66364	-1.13101	0.00241167	2.26e-05	7.5e-05
HIST2H2AC	protein_coding	-1.42743	-2.24923	0.00098154	2.72e-05	7.5e-05
NEIL1	protein_coding	0.62266	1.57197	0.0286232	2.3e-05	7.5e-05
DLGAP5	protein_coding	-1.15308	-1.65832	0.00098154	2.74e-05	7.6e-05
HIST1H2BI	protein_coding	-1.70468	-3.20894	0.00119103	2.7e-05	7.78e-05
CLIP3	protein_coding	0.80713	1.43758	0.00397192	2.29e-05	7.93e-05
TCEA3	protein_coding	1.7833	1.68234	0.00014341	0.00010924	7.93e-05
TAF7L	protein_coding	1.63456	1.05266	7.67e-05	0.00115783	8.13e-05
PRPS1	protein_coding	-0.82006	-0.95042	0.00032755	5.18e-05	8.2e-05
UBE2J1	protein_coding	-0.79325	-0.53287	8.3e-05	0.00075781	8.25e-05
NUP107	protein_coding	-0.44817	-1.07517	0.0183916	2.44e-05	8.29e-05
PARP1	protein_coding	-0.76937	-0.87805	0.00032788	5.28e-05	8.32e-05
COL5A1	protein_coding	-0.47411	0.48967	0.00877209	0.00440606	8.34e-05
ACER2	protein_coding	1.31896	1.1491	0.00012119	0.00018302	8.5e-05
POLE3	protein_coding	-0.61233	-0.84423	0.00086978	3.37e-05	8.63e-05
RBL1	protein_coding	-0.65942	-1.20555	0.00394953	2.54e-05	8.63e-05
CMC2	protein_coding	-0.66125	-0.88493	0.00075995	3.72e-05	8.91e-05
TRIM22	protein_coding	0.67416	0.72379	0.00027969	6.98e-05	9.07e-05
MTBP	protein_coding	-0.55028	-1.21361	0.0110135	2.65e-05	9.26e-05
APOBEC3C	protein_coding	0.75043	1.08634	0.00130696	3.28e-05	9.54e-05
HAUS8	protein_coding	-0.7516	-1.57825	0.00782969	2.74e-05	9.7e-05
PARPBP	protein_coding	-0.51836	-1.38515	0.027424	2.89e-05	9.7e-05
TK1	protein_coding	-0.85502	-1.47755	0.00278368	2.9e-05	9.7e-05
ADCY4	protein_coding	1.09716	1.69131	0.0019959	3.14e-05	9.92e-05
G2E3	protein_coding	-0.50628	-0.99447	0.00650927	2.82e-05	9.92e-05
EDA2R	protein_coding	1.45434	1.49482	0.00025016	9.11e-05	9.92e-05
FH	protein_coding	-0.71308	-0.88221	0.00056338	5.04e-05	9.94e-05
SHCBP1	protein_coding	-1.1291	-1.6606	0.00126856	3.52e-05	9.94e-05
UBE2C	protein_coding	-0.53367	-1.18551	0.0125057	2.84e-05	9.94e-05
CSE1L	protein_coding	-0.48965	-0.98089	0.00877209	2.85e-05	0.0001003
ELOVL6	protein_coding	-0.86011	-0.44924	8.63e-05	0.00422237	0.00010054
PSTPIP2	protein_coding	1.3855	1.15552	0.00012579	0.00026911	0.00010054
ZWILCH	protein_coding	-0.74714	-1.17959	0.00193845	3.25e-05	0.00010054
TIPIN	protein_coding	-0.79817	-1.14916	0.00108542	3.82e-05	0.00010108
H2AFV	protein_coding	-0.78538	-0.78211	0.0002376	0.00010611	0.00010128
IFNE	protein_coding	0.81655	1.35041	0.00312375	3.08e-05	0.00010128
KDELC2	protein_coding	-0.7081	-0.87605	0.00057214	5.2e-05	0.00010128
PCNXL2	protein_coding	0.90585	1.03521	0.00039312	6.47e-05	0.00010128
TOPBP1	protein_coding	-0.45051	-0.90716	0.00877209	2.91e-05	0.00010158
TRIP13	protein_coding	-0.82157	-1.31698	0.00207898	3.32e-05	0.0001034
NOP58	protein_coding	-0.46788	-0.96519	0.0101548	2.98e-05	0.00010351
SNRPD1	protein_coding	-0.74797	-0.86376	0.00040565	6.57e-05	0.00010351
H2AFZ	protein_coding	-1.11302	-1.40607	0.00069079	5.04e-05	0.00010454
H2AFX	protein_coding	-1.02071	-1.50579	0.00126856	3.98e-05	0.00010809
ORC6	protein_coding	-0.87588	-1.55975	0.00362008	3.27e-05	0.00010917
CDCA4	protein_coding	-0.83359	-1.2091	0.00122168	4.15e-05	0.00010981
ERN1	protein_coding	1.11724	0.65262	9.27e-05	0.00272173	0.00010981
TEX15	protein_coding	-0.65629	-2.13333	0.0440969	3.5e-05	0.0001099
HIST1H2BK	protein_coding	-0.71592	-1.11529	0.00182101	3.74e-05	0.0001101
MCM7	protein_coding	-0.9296	-1.30744	0.00114934	4.35e-05	0.00011022
KIF18B	protein_coding	-0.68717	-1.51363	0.0119013	3.24e-05	0.0001107
MAPK8IP3	protein_coding	0.7575	1.29136	0.00397959	3.38e-05	0.00011291
PCNA	protein_coding	-0.50743	-1.04602	0.0101816	3.27e-05	0.00011291
TCF19	protein_coding	-1.10624	-1.84295	0.00195715	3.82e-05	0.00011361
STOM	protein_coding	0.8971	0.64129	0.00011157	0.00069434	0.00011375
SESN1	protein_coding	0.73122	0.84311	0.00046784	7.2e-05	0.00011744
DSN1	protein_coding	-0.83679	-1.19973	0.00126689	4.59e-05	0.00011765
MASTL	protein_coding	-0.75093	-1.27797	0.00325886	3.69e-05	0.00011813
ATP5G1	protein_coding	-0.8612	-0.51139	9.95e-05	0.00223779	0.00011832
NCAPG2	protein_coding	-0.77301	-1.31307	0.00328692	3.81e-05	0.00012287
IDI1	protein_coding	-0.93723	-0.36186	0.00010605	0.0261541	0.00012513
KPNA2	protein_coding	-0.65484	-1.03019	0.00262406	4.27e-05	0.00013202
CHEK1	protein_coding	-0.79317	-0.94867	0.00057862	7.49e-05	0.00013358
FST	protein_coding	-0.53952	-1.60387	0.0453007	4.28e-05	0.00013442
AURKB	protein_coding	-1.02715	-1.84946	0.00406022	4.14e-05	0.00013659
MTHFD2	protein_coding	0.52859	-0.63413	0.0158327	0.00458503	0.00013712
TMEM97	protein_coding	-0.99931	-0.65721	0.00011724	0.00130524	0.00013932
SULF1	protein_coding	-1.05984	-0.5989	0.00011128	0.00313113	0.00014209
KIAA0101	protein_coding	-0.84587	-1.4243	0.00325886	4.62e-05	0.0001452
NRG1	protein_coding	0.79553	0.48761	0.00011358	0.00217714	0.0001452
DRAXIN	protein_coding	2.38479	2.24708	0.00025052	0.00020217	0.00014603
H2BFS	protein_coding	-1.24518	-2.05368	0.00192181	5.18e-05	0.00014603
SPAG5	protein_coding	-1.10565	-1.58049	0.00138226	5.92e-05	0.00014936
HIST1H2BD	protein_coding	-1.25308	-1.9366	0.00149086	5.8e-05	0.00014968
MRPL17	protein_coding	-0.68653	-0.69186	0.0003232	0.00015052	0.00015136
PDE4D	protein_coding	0.67476	0.81199	0.00073776	8.11e-05	0.00015307
RAD51	protein_coding	-1.08782	-1.29335	0.00060407	9.05e-05	0.0001536
SPC25	protein_coding	-1.27155	-2.26433	0.00368197	4.89e-05	0.00015412
NIPAL3	protein_coding	0.79837	0.83761	0.00038489	0.00012973	0.00015412
ADAM32	protein_coding	1.05906	1.35111	0.00098173	7.12e-05	0.00015617
MYBL1	protein_coding	-0.79997	-1.33543	0.00325886	5.08e-05	0.00015695
DAW1	protein_coding	-1.5144	-0.84823	0.00011902	0.00329198	0.00016016
CCNB1	protein_coding	-1.17292	-1.595	0.00130696	6.63e-05	0.00016132
TFDP1	protein_coding	-0.71267	-0.74261	0.00039391	0.00013391	0.00016132
CISD1	protein_coding	-0.66005	-0.70244	0.00041566	0.00013078	0.00016382
FBN1	protein_coding	-0.36444	0.42053	0.0177374	0.00512435	0.00016391
HIST1H2AC	protein_coding	-1.19281	-1.52498	0.00083563	8.44e-05	0.00016407
SPDL1	protein_coding	-0.55966	-1.16612	0.0140416	4.89e-05	0.00016407
PEAR1	protein_coding	0.69072	0.64344	0.00027908	0.00023184	0.00016677
SMC1A	protein_coding	-0.57475	-0.84165	0.00207898	6.07e-05	0.00016765
CNTRL	protein_coding	-0.5422	-0.99553	0.00670726	5.06e-05	0.00016767
PARP2	protein_coding	-0.41438	-0.90815	0.0176537	5.04e-05	0.00016767
LRP1	protein_coding	1.04799	1.71079	0.00424649	5.28e-05	0.00016771
DTYMK	protein_coding	-0.64179	-0.979	0.0023925	5.92e-05	0.00016774
FTH1	protein_coding	1.03779	0.72387	0.00014341	0.00119883	0.00016978
NUP35	protein_coding	-0.6719	-1.20261	0.00506638	5.37e-05	0.00017359
DKC1	protein_coding	-0.61315	-0.89329	0.00207898	6.39e-05	0.00017427
HMGB1	protein_coding	-0.82742	-1.14358	0.00157637	6.89e-05	0.00017448
GPSM2	protein_coding	-0.75139	-1.30053	0.0043695	5.52e-05	0.00017449
ABI3BP	protein_coding	-0.86973	-0.51248	0.00013007	0.00313113	0.00017558
PLK1	protein_coding	-0.82877	-1.51356	0.00609993	5.41e-05	0.00017626
TUBA1C	protein_coding	-0.60889	-0.84248	0.00162589	6.97e-05	0.00017626
STEAP1B	protein_coding	-0.7242	-0.87685	0.00081226	9.68e-05	0.00017632
HIST1H2AE	protein_coding	-1.17065	-2.10577	0.00326814	6.09e-05	0.00018003
NLRP1	protein_coding	0.71845	0.70647	0.00035417	0.00020351	0.000183
LTBP2	protein_coding	-0.35936	0.41772	0.0193879	0.00555079	0.00018337
ST8SIA4	protein_coding	-1.07106	-0.52026	0.00013063	0.00945226	0.00018412
NABP1	protein_coding	0.50495	0.8415	0.00476967	5.92e-05	0.00018437
SUPT16H	protein_coding	-0.47678	-0.76315	0.00368197	6.15e-05	0.00018437
ZNF528	protein_coding	0.69174	1.02059	0.00243772	6.63e-05	0.00018437
SLC9A1	protein_coding	1.0519	0.70387	0.00014863	0.00160413	0.00018557
GRINA	protein_coding	0.70842	0.87916	0.00098924	9.36e-05	0.00018838
PLXNA3	protein_coding	0.56578	1.2285	0.0214738	5.84e-05	0.00018948
NADSYN1	protein_coding	0.63502	0.79838	0.00108542	9.25e-05	0.00019157
NRP2	protein_coding	0.49946	0.83114	0.00493456	6.29e-05	0.00019428
ATAT1	protein_coding	0.72445	1.2205	0.00563632	6.39e-05	0.00020236
ASTN2	protein_coding	1.69857	1.70444	0.00040565	0.00021022	0.00020249
RFC2	protein_coding	-1.04346	-1.19416	0.00067648	0.00013368	0.00020358
PER2	protein_coding	0.67894	-0.47036	0.0048136	0.031602	0.00020472
KIF22	protein_coding	-0.72203	-1.50136	0.0129161	6.29e-05	0.00020513
TSPYL2	protein_coding	0.64855	0.87721	0.00163162	8.48e-05	0.00020513
WHSC1	protein_coding	-0.60743	-0.77632	0.0012464	9.55e-05	0.00020539
RNF219	protein_coding	-0.62166	-1.00383	0.00357053	7.05e-05	0.00020936
EXOSC9	protein_coding	-0.48899	-0.95083	0.0105993	6.44e-05	0.00021138
SLC7A14	protein_coding	1.18757	1.35805	0.00080287	0.00013182	0.00021383
CCNL2	protein_coding	0.44151	0.82727	0.0104255	6.63e-05	0.00021756
MTFR2	protein_coding	-0.63932	-1.64811	0.0353342	6.85e-05	0.00021772
CEP128	protein_coding	-0.60166	-1.29078	0.0173892	6.65e-05	0.00021817
PLS1	protein_coding	-1.04988	-1.79759	0.00338418	7.5e-05	0.00021817
SHISA3	protein_coding	-1.1768	-1.48552	0.00096717	0.00012017	0.00021817
ANKRD32	protein_coding	-0.47376	-1.09329	0.0236011	6.78e-05	0.00021992
HSP90AA1	protein_coding	-0.59112	-0.88269	0.00299772	7.9e-05	0.00021992
MAP1A	protein_coding	0.43583	0.9429	0.02232	6.78e-05	0.00021992
CENPL	protein_coding	-0.75979	-1.29888	0.00493876	7.2e-05	0.00022009
SAPCD2	protein_coding	-1.03359	-1.64418	0.00270028	8.12e-05	0.00022009
NUP88	protein_coding	-0.64194	-0.77989	0.00098924	0.0001207	0.00022088
NACAD	protein_coding	0.9878	1.27586	0.00143011	0.0001006	0.000221
ASXL3	protein_coding	1.28575	1.74532	0.0019114	9.06e-05	0.00022104
GGH	protein_coding	-0.65677	-1.01135	0.00326814	7.9e-05	0.00022253
KPNB1	protein_coding	-0.55624	-0.66781	0.0009907	0.00012254	0.00022266
TFRC	protein_coding	-0.50672	-0.805	0.00415709	7.52e-05	0.00022307
PRPS2	protein_coding	-0.73185	-0.9805	0.00154113	0.0001006	0.00022623
NPR2	protein_coding	0.95077	0.73063	0.00023642	0.00093701	0.00022636
TXNIP	protein_coding	0.86809	0.63388	0.00021943	0.00120006	0.00022636
LRP10	protein_coding	0.70718	0.67716	0.00040565	0.00029269	0.00023005
NUDCD2	protein_coding	-0.82965	-0.77246	0.00037389	0.00034028	0.00023309
RGS11	protein_coding	1.38619	1.98845	0.00278368	8.74e-05	0.00023414
LIN9	protein_coding	-0.65856	-1.26343	0.00966327	7.47e-05	0.00023953
TSPAN11	protein_coding	0.76239	1.15347	0.00347344	8.48e-05	0.00023953
HHIP	protein_coding	-0.35357	0.36375	0.0168269	0.00960838	0.00024544
PLK3	protein_coding	1.23318	1.07581	0.0003232	0.00050896	0.00024544
TOB1	protein_coding	0.69491	1.06178	0.00371042	8.66e-05	0.00024544
DONSON	protein_coding	-0.76413	-0.86441	0.00081194	0.00017616	0.00025043
GABRE	protein_coding	0.53462	1.0274	0.0138165	8.11e-05	0.00026402
MTRNR2L12	protein_coding	-1.03199	-0.64626	0.00021301	0.00305268	0.00026419
KIF4B	protein_coding	-0.94347	-1.35073	0.00224443	0.00010713	0.0002658
FUCA1	protein_coding	0.77985	1.20982	0.00434145	9.15e-05	0.00026766
AFF3	protein_coding	1.51406	1.2354	0.00029756	0.00077583	0.00026905
NCL	protein_coding	-0.46012	-0.71122	0.00420835	9.4e-05	0.00027298
CHAF1A	protein_coding	-0.66876	-1.27063	0.0101519	8.52e-05	0.00027384
ECI2	protein_coding	-0.93169	-0.60918	0.00023216	0.00245573	0.00027413
NEK2	protein_coding	-0.81771	-1.6431	0.013182	8.48e-05	0.00027413
SEMA3D	protein_coding	-0.78231	-1.02217	0.00154	0.00013078	0.00027453
C1orf110	protein_coding	-1.16933	-0.89442	0.00027718	0.00105347	0.00027711
TMEM106C	protein_coding	-0.75081	-1.19282	0.00426505	9.75e-05	0.00028124
TBC1D4	protein_coding	-0.66992	-0.63907	0.00047479	0.00035689	0.00028156
MIS18A	protein_coding	-0.58903	-1.34168	0.0249967	8.74e-05	0.00028211
BORA	protein_coding	-0.54819	-1.10583	0.0141711	8.76e-05	0.00028465
CEACAM19	protein_coding	0.97438	1.2456	0.00164659	0.00013284	0.00028465
LYAR	protein_coding	-0.65754	-0.89459	0.00199926	0.00012481	0.00028773
C15orf52	protein_coding	0.65333	1.04462	0.00546434	9.75e-05	0.00029065
POLE2	protein_coding	-0.81502	-1.22122	0.00295773	0.00011299	0.00029657
INCENP	protein_coding	-0.57061	-1.23056	0.0200543	9.15e-05	0.00029788
CDKN2D	protein_coding	-1.05899	-1.13677	0.00073739	0.00025791	0.00029788
POLA2	protein_coding	-0.54544	-1.04225	0.0117265	9.25e-05	0.00029788
RAD1	protein_coding	-0.64183	-0.90748	0.00251538	0.0001207	0.00029788
TACC3	protein_coding	-0.67274	-1.13526	0.00628804	9.8e-05	0.00029788
VEPH1	protein_coding	-0.72389	-0.43116	0.00023216	0.00445911	0.00029788
YWHAH	protein_coding	-0.76857	-0.69462	0.00041973	0.00048834	0.00029887
CDC20	protein_coding	-1.03985	-1.45171	0.00225159	0.00013072	0.00031016
C5orf34	protein_coding	-0.52816	-1.32382	0.0358564	9.89e-05	0.00031467
C1orf112	protein_coding	-0.67937	-1.2118	0.00840531	0.00010061	0.000318
HSPD1	protein_coding	-0.56467	-0.87937	0.00499516	0.00011202	0.000327
TP53I3	protein_coding	0.86961	0.82938	0.00053743	0.00041898	0.000327
RAD21	protein_coding	-0.58778	-0.96307	0.00650927	0.00010795	0.00032871
SSX2IP	protein_coding	-0.50994	-1.02664	0.0158893	0.0001006	0.0003298
RFWD3	protein_coding	-0.34866	-0.79815	0.0327802	0.00010379	0.0003328
NASP	protein_coding	-0.56011	-0.87926	0.00531852	0.0001147	0.00033694
YBX3	protein_coding	0.72538	0.41395	0.00024646	0.00629033	0.00033694
CTNNAL1	protein_coding	-0.87425	-0.77054	0.00043445	0.00060943	0.00033871
PSMC3IP	protein_coding	-0.82174	-1.36589	0.00493456	0.00011792	0.00033871
SKA2	protein_coding	-0.83951	-0.89716	0.00084492	0.00028801	0.00033943
HIST2H2BE	protein_coding	-1.02972	-1.17932	0.00098154	0.00024679	0.00034253
RIBC2	protein_coding	-1.22194	-2.26073	0.00650927	0.00011421	0.00034284
RFC5	protein_coding	-0.49853	-1.12547	0.0280617	0.00010713	0.00034284
DIAPH3	protein_coding	-0.73495	-1.21893	0.00678342	0.00011421	0.00034385
ANP32A	protein_coding	-0.52641	-0.62861	0.00138226	0.00019874	0.00034472
BHLHE40	protein_coding	0.80278	0.30686	0.00026785	0.0482455	0.00034876
CDC25C	protein_coding	-0.91188	-1.468	0.00489662	0.00012481	0.00035203
MRAS	protein_coding	0.49058	0.99135	0.0212391	0.00010924	0.00035203
SUV39H1	protein_coding	-0.66066	-1.48319	0.024998	0.00011042	0.00035545
ARL13B	protein_coding	-0.38308	-0.90461	0.0355795	0.00011281	0.00035608
PSMG1	protein_coding	-0.59195	-0.85191	0.00332955	0.00013639	0.00035608
LRRC17	protein_coding	-1.51035	-0.56602	0.00027004	0.0441895	0.00035718
AHSA2	protein_coding	0.53685	0.7766	0.00363041	0.00013409	0.00035905
CCNB2	protein_coding	-0.9034	-1.35525	0.00387441	0.00013349	0.0003612
TFAM	protein_coding	-0.42833	-0.92674	0.0260789	0.0001154	0.00037287
LMNB2	protein_coding	-0.60423	-0.8452	0.0030294	0.00015198	0.00037506
POLR2D	protein_coding	-0.59807	-0.75969	0.00182101	0.00019271	0.00037693
TTYH3	protein_coding	0.67192	0.76398	0.00122598	0.00024679	0.00038063
ACTL6A	protein_coding	-0.34141	-0.8004	0.03887	0.00012137	0.00038404
MOV10L1	protein_coding	0.72396	0.90658	0.0018689	0.00019515	0.00038491
MXD1	protein_coding	0.73981	0.52703	0.00032465	0.00216354	0.00038574
CENPM	protein_coding	-1.19697	-1.75511	0.00299118	0.00015828	0.00038584
CBX3	protein_coding	-0.62082	-0.72294	0.00135636	0.00023681	0.00038735
EFNB1	protein_coding	0.94879	0.77297	0.00040565	0.00109081	0.00039298
KDM5B	protein_coding	0.50922	0.6235	0.00173033	0.00020961	0.00039422
HIST1H4E	protein_coding	-1.12014	-1.53909	0.0025053	0.00017767	0.00039736
RNF168	protein_coding	-0.62938	-0.59002	0.00062355	0.00054076	0.00039808
DDB2	protein_coding	0.71788	0.57397	0.00040565	0.00116188	0.00040097
SCLT1	protein_coding	-0.52431	-0.93076	0.0102583	0.00012881	0.00040097
PPAT	protein_coding	-0.68589	-0.87782	0.0019959	0.0002023	0.00040342
TYMS	protein_coding	-0.69267	-1.03034	0.00426627	0.00015052	0.00040342
CDCA8	protein_coding	-0.87646	-1.51607	0.00823246	0.00013285	0.00040357
LRRCC1	protein_coding	-0.59336	-1.39835	0.0308908	0.00012746	0.00040415
APOD	protein_coding	1.38402	1.72539	0.00195364	0.00020647	0.00040559
CEP78	protein_coding	-0.51418	-0.96305	0.0137202	0.00012851	0.00040562
SLC4A11	protein_coding	1.08602	1.33431	0.0018689	0.00022009	0.00041891
TROAP	protein_coding	-0.51292	-1.28911	0.0459972	0.00013349	0.00041891
SRSF7	protein_coding	-0.64585	-0.80223	0.00193845	0.00021579	0.00041967
GINS3	protein_coding	-0.78764	-1.34142	0.00774304	0.0001421	0.00042513
OSBPL3	protein_coding	0.62421	0.56009	0.00057862	0.00068737	0.00042513
PPIF	protein_coding	-0.6455	-0.72456	0.00121047	0.00030626	0.00042539
PPM1D	protein_coding	0.85468	0.34258	0.00031746	0.0477548	0.00042837
ANKRA2	protein_coding	1.14924	0.70921	0.00031716	0.00553775	0.00042964
DSCC1	protein_coding	-0.75427	-1.8398	0.0309806	0.00013368	0.00042964
APBB3	protein_coding	1.56631	1.49634	0.00072946	0.00057432	0.0004453
PRIM2	protein_coding	-0.63134	-1.03457	0.00711839	0.00015251	0.00044617
OPN1SW	protein_coding	-1.11411	-0.69319	0.00032788	0.00460138	0.00045078
BIRC5	protein_coding	-1.29943	-1.45352	0.00122548	0.00034089	0.00046107
NUAK1	protein_coding	0.62607	0.66108	0.00106381	0.00038647	0.00046135
SRSF2	protein_coding	-0.81257	-0.49488	0.00033078	0.00553775	0.00047018
RMI1	protein_coding	-1.03437	-1.23305	0.00159256	0.00029159	0.00047039
LPXN	protein_coding	1.09277	0.87203	0.00045516	0.00143454	0.00047114
STAG1	protein_coding	-0.56131	-0.80514	0.00399767	0.00018974	0.00047114
SERPINB2	protein_coding	-0.77389	-0.96079	0.00192786	0.00025791	0.00047143
PRR11	protein_coding	-0.725	-0.99073	0.00325886	0.00020455	0.00047185
DIS3L	protein_coding	-0.43001	-0.74131	0.0101659	0.00015681	0.00047703
UCHL5	protein_coding	-0.56304	-0.77374	0.0033089	0.00020472	0.00047703
PRKAB2	protein_coding	0.72826	0.60426	0.00052241	0.00115608	0.00047871
RGS4	protein_coding	-0.60962	-0.92936	0.00573525	0.00017617	0.00047871
SLC2A11	protein_coding	0.64167	1.28942	0.0258681	0.00015167	0.00048057
MX1	protein_coding	1.49104	1.05467	0.00039312	0.00295553	0.00048909
NEDD1	protein_coding	-0.36095	-0.85564	0.0437601	0.00015722	0.00048979
FANCA	protein_coding	-0.63199	-1.15803	0.0128092	0.0001616	0.00050238
HIST1H2BL	protein_coding	-1.00322	-2.25089	0.0199665	0.00015722	0.00050238
HMMR	protein_coding	-0.95102	-1.18904	0.00212177	0.0002687	0.00050435
TRIM66	protein_coding	0.7484	0.98681	0.00302912	0.00023078	0.00050731
SDSL	protein_coding	1.40979	1.34161	0.00081112	0.00066738	0.00050886
LRR1	protein_coding	-0.97783	-1.20415	0.00193382	0.00029609	0.00051604
TMEM237	protein_coding	-0.83781	-0.58038	0.00040678	0.00301741	0.00051832
HAUS2	protein_coding	-0.75205	-0.7108	0.00081194	0.00069083	0.00052446
EME1	protein_coding	-0.57606	-1.3062	0.0313036	0.00017026	0.00053892
VLDLR	protein_coding	1.58326	0.71318	0.00037389	0.0355918	0.00055052
C2orf66	protein_coding	1.0873	2.3158	0.0393293	0.00017633	0.00055301
ALDH1A2	protein_coding	-0.65076	-0.85457	0.00284012	0.0002638	0.00055651
FANCB	protein_coding	-0.67563	-1.57544	0.0339841	0.00017736	0.00055982
FARSB	protein_coding	-0.42302	-0.70761	0.0103021	0.00019038	0.00056372
UBR7	protein_coding	-0.70683	-0.99012	0.00383347	0.00023681	0.00056501
NOP56	protein_coding	-0.65342	-0.69674	0.00129827	0.00045319	0.00056553
HNRNPD	protein_coding	-0.57408	-0.6624	0.00181659	0.00035479	0.00057361
KDM4B	protein_coding	0.86974	0.80922	0.00083563	0.00079971	0.0005807
SEZ6L2	protein_coding	1.0174	1.71128	0.0128458	0.00019139	0.00058224
SRSF3	protein_coding	-0.62972	-0.87967	0.00443157	0.00024034	0.00060001
TRIM38	protein_coding	0.61451	0.66784	0.00145534	0.00044682	0.00060131
SNRNP25	protein_coding	-0.96909	-0.70701	0.00049699	0.00256149	0.00060228
LSM3	protein_coding	-0.51662	-0.8019	0.00678342	0.00021775	0.00060413
MPHOSPH9	protein_coding	-0.53993	-0.85463	0.00784122	0.00021201	0.00060413
C12orf75	protein_coding	-0.83232	-0.6885	0.00065113	0.00137717	0.0006065
CKS2	protein_coding	-0.83053	-1.36669	0.00925082	0.00020904	0.00060738
KLHL4	protein_coding	-0.71557	-0.62626	0.00075995	0.00108532	0.00061231
SLC8A1	protein_coding	-0.87744	-1.27415	0.00405558	0.00025791	0.00061461
PSIP1	protein_coding	-0.35181	-0.81532	0.0468124	0.00020167	0.00062247
HSPA14	protein_coding	-0.53545	-0.70518	0.00326047	0.00029852	0.00063608
POLR3K	protein_coding	-0.80013	-0.84052	0.00128453	0.00055906	0.00063608
AMY2B	protein_coding	0.94422	1.73598	0.0201915	0.00020351	0.00063898
ZKSCAN1	protein_coding	0.52568	0.64478	0.00257782	0.00033768	0.00063988
ARNTL2	protein_coding	-0.64335	-0.55388	0.00075995	0.00120006	0.0006412
SLFN13	protein_coding	-0.97691	-0.84909	0.00076103	0.00119305	0.0006412
ZFHX4	protein_coding	0.85007	0.93855	0.00162517	0.00046865	0.0006516
MST1	protein_coding	1.25633	1.63922	0.00352935	0.00029852	0.00065546
TAF5	protein_coding	-0.50009	-1.05304	0.0280984	0.00020768	0.00065546
JUP	protein_coding	0.4657	0.85476	0.018845	0.00020961	0.00065551
MTRNR2L10	protein_coding	-1.17608	-0.6063	0.00041889	0.0158846	0.00065551
CENPW	protein_coding	-1.0627	-1.29654	0.00225832	0.00037422	0.00065551
NDRG1	protein_coding	0.9289	0.67235	0.00053667	0.00302934	0.00065603
C4orf46	protein_coding	-0.72316	-1.15636	0.00839435	0.00023249	0.00065658
ZNF185	protein_coding	0.31251	0.65712	0.0348737	0.00020961	0.00065746
CIT	protein_coding	-0.58866	-1.09193	0.0177912	0.00021201	0.00065929
CTDSPL2	protein_coding	-0.44085	-0.83242	0.019059	0.00021201	0.00066433
OIP5	protein_coding	-0.8594	-1.55879	0.0123188	0.00022157	0.00066608
KIF2C	protein_coding	-0.7111	-1.57069	0.0337149	0.00021201	0.00066736
ENOPH1	protein_coding	-0.45999	-0.68999	0.0065627	0.00025075	0.00066933
ANXA4	protein_coding	0.61767	0.58058	0.00098154	0.00086313	0.00067311
MANEA	protein_coding	-0.71276	-0.84799	0.00217472	0.00040224	0.00067311
ZFP36L1	protein_coding	0.66778	0.32461	0.00042896	0.0230592	0.00067323
TEP1	protein_coding	0.50951	0.78833	0.00840671	0.00024167	0.00067656
PPIL1	protein_coding	-0.58841	-0.77016	0.00332586	0.00032412	0.00067885
GABBR1	protein_coding	0.39627	0.84914	0.0395703	0.00021775	0.00067966
OXCT1	protein_coding	-0.64238	-0.60143	0.00098154	0.00090477	0.00068502
IGF2R	protein_coding	0.55152	0.49238	0.00088936	0.00108884	0.00068891
USP20	protein_coding	0.95484	0.8592	0.00088162	0.00111462	0.00068997
CMSS1	protein_coding	-0.47506	-0.84567	0.0147828	0.00022874	0.00069018
STMN1	protein_coding	-0.90471	-1.06472	0.00225597	0.00041182	0.00069407
PTGES3	protein_coding	-0.55875	-0.78442	0.00516523	0.00028897	0.00069658
CYCS	protein_coding	-0.83477	-0.81868	0.00119708	0.00074916	0.00070193
RFC1	protein_coding	-0.30736	-0.69128	0.0461501	0.00022874	0.0007021
TUBA4A	protein_coding	-0.84179	-0.71922	0.00081194	0.00140184	0.00070767
RHBDF1	protein_coding	0.73329	1.00649	0.00476491	0.00030083	0.00070914
SAE1	protein_coding	-0.59624	-0.72265	0.00265035	0.00039365	0.00071073
CCND2	protein_coding	0.4948	1.06621	0.0430841	0.00023299	0.00072252
ISCU	protein_coding	0.62054	0.67376	0.00170185	0.0005474	0.00072585
ERLIN1	protein_coding	-0.42015	-0.6809	0.0108297	0.00025102	0.00072771
LXN	protein_coding	-0.79754	-0.40322	0.00047479	0.019628	0.00073924
HAUS1	protein_coding	-0.76624	-0.7547	0.00121047	0.00081047	0.00073971
HNRNPF	protein_coding	-0.38707	-0.67139	0.0153547	0.00024601	0.00074276
CEP192	protein_coding	-0.33981	-0.63686	0.0213636	0.00024021	0.00074395
ITGBL1	protein_coding	-0.65559	-0.66862	0.00138086	0.00071926	0.00075999
TNFRSF10B	protein_coding	0.53386	0.51037	0.00119103	0.00090147	0.00077025
FANCD2	protein_coding	-0.62515	-1.03392	0.0110519	0.00027021	0.00078152
KNSTRN	protein_coding	-0.78934	-1.14492	0.00595062	0.00031761	0.00079058
RBBP7	protein_coding	-0.6336	-0.74801	0.00256938	0.0004605	0.00079058
PLXNB1	protein_coding	0.76131	1.13593	0.00808605	0.00029859	0.0008048
CDH5	protein_coding	0.30736	0.604	0.0291792	0.00025852	0.00081488
GJC1	protein_coding	-0.76265	-0.38949	0.00052402	0.0197584	0.00081488
PLXNB3	protein_coding	1.36263	1.78783	0.0043695	0.00036369	0.00081488
RDX	protein_coding	-0.48341	-0.66528	0.00539424	0.00034539	0.00083342
VEGFC	protein_coding	-0.52571	-0.60893	0.00235855	0.00052518	0.00083576
SGK223	protein_coding	0.7498	0.70217	0.00116901	0.00109139	0.00084546
LSS	protein_coding	-0.48543	0.34377	0.0161517	0.0494008	0.00085018
TOX	protein_coding	-0.41777	-0.71943	0.0146022	0.0002856	0.00085018
GPR173	protein_coding	0.54819	1.08537	0.0321853	0.00027021	0.00085308
LSM6	protein_coding	-0.62335	-0.94031	0.00757609	0.00032412	0.00086214
MED30	protein_coding	-0.52458	-1.21573	0.0447135	0.00027628	0.00086272
EBNA1BP2	protein_coding	-0.49371	-0.62774	0.00375076	0.00041643	0.00086796
SLC30A1	protein_coding	0.82086	0.48362	0.00057214	0.0112862	0.0008696
MYH10	protein_coding	-0.60124	-0.3343	0.00056817	0.0137571	0.00087106
CCDC84	protein_coding	0.45866	0.73931	0.0120839	0.00030083	0.00087341
NUCKS1	protein_coding	-0.54047	-0.61186	0.00233332	0.00056262	0.00087341
DCP1B	protein_coding	0.77542	0.42017	0.00056817	0.0174034	0.00087761
CKS1B	protein_coding	-0.91939	-1.42271	0.00817977	0.00032815	0.00087869
PGPEP1	protein_coding	0.64384	1.05666	0.0134405	0.00029852	0.00087869
MRPL18	protein_coding	-0.56089	-0.79613	0.00606852	0.00035981	0.00088725
SNRPG	protein_coding	-0.76288	-0.87302	0.00230336	0.00058457	0.00089163
TRANK1	protein_coding	0.66897	0.87713	0.00443157	0.00040582	0.00089323
RANBP1	protein_coding	-0.82817	-0.81495	0.00141145	0.00095988	0.00090355
EVI2B	protein_coding	-1.1191	-1.19946	0.00171894	0.0007649	0.00090355
KALRN	protein_coding	0.46752	0.84211	0.021064	0.00029534	0.00090479
CHAC2	protein_coding	-0.86661	-1.22041	0.00539424	0.00038939	0.0009111
POC5	protein_coding	-0.43461	-0.92127	0.0359098	0.00029422	0.00091303
EMP2	protein_coding	-0.59529	-0.98811	0.0123573	0.00031767	0.00091553
SAAL1	protein_coding	-0.47787	-0.88981	0.021607	0.00029852	0.00091553
VIP	protein_coding	1.58844	2.03739	0.00426609	0.00042927	0.00091682
WDR45	protein_coding	0.89086	0.86494	0.00137773	0.00103315	0.00091682
LTBP3	protein_coding	0.55528	0.95776	0.0176168	0.00030495	0.00091857
SCML1	protein_coding	-0.64873	-0.84241	0.00396759	0.00044682	0.00091919
CXCL16	protein_coding	0.91247	0.99284	0.00204339	0.00067902	0.00092131
FKBP5	protein_coding	-0.58944	-0.53829	0.00121047	0.00127148	0.00092352
CKAP5	protein_coding	-0.42758	-0.74529	0.0179573	0.00030692	0.00092542
RNASEH2A	protein_coding	-0.6168	-1.14536	0.0200543	0.00030641	0.00093252
SVIP	protein_coding	-0.67397	-0.63779	0.00130336	0.00115061	0.00093329
DARS2	protein_coding	-0.6098	-0.75184	0.00334099	0.00050677	0.00093435
PAICS	protein_coding	-1.07872	-0.98242	0.00122099	0.00129733	0.00093598
NCAPD2	protein_coding	-0.52683	-0.82268	0.0104524	0.00034089	0.00093814
ITGA2	protein_coding	0.60664	0.4626	0.00084835	0.00301221	0.00095622
MZT1	protein_coding	-0.66999	-1.08196	0.0113391	0.00034119	0.00095843
NUP155	protein_coding	-0.45857	-0.7265	0.0115499	0.00034089	0.00095843
CCDC18	protein_coding	-0.47571	-0.9766	0.0327113	0.00031205	0.00096072
ENY2	protein_coding	-0.47099	-0.62481	0.00498896	0.00043585	0.00096072
ICT1	protein_coding	-0.46504	-0.67492	0.00718613	0.00038647	0.00096072
SUV39H2	protein_coding	-0.54006	-1.103	0.0316362	0.00031445	0.00096916
VPS29	protein_coding	-0.75731	-0.47154	0.00068339	0.00840157	0.00097715
CDK4	protein_coding	-0.39979	-0.75319	0.0248106	0.00032051	0.00097956
SCFD2	protein_coding	-0.7068	-0.53313	0.00084835	0.00333313	0.00097956
TTF2	protein_coding	-0.53613	-0.75634	0.00640307	0.00040698	0.00097956
POLE	protein_coding	-0.38788	-0.79396	0.0343539	0.00031965	0.00098322
MRPL3	protein_coding	-0.33093	-0.68583	0.037898	0.00032051	0.00098499
ICMT	protein_coding	-0.48177	-0.59616	0.00371042	0.00052537	0.00099444
MLH1	protein_coding	-0.5069	-0.61078	0.0032882	0.00056599	0.00099832
RECQL4	protein_coding	-0.53734	-1.11867	0.0314454	0.00032412	0.0009993
ADAMTS7	protein_coding	0.5808	0.97433	0.0163473	0.00034119	0.00100189
AIM1	protein_coding	-0.92391	-0.70803	0.00089071	0.00313684	0.00100997
NUCB2	protein_coding	-0.74368	-0.49148	0.00075995	0.00654654	0.00103408
HECTD4	protein_coding	0.45347	0.61446	0.00598056	0.00044682	0.00103455
CALCOCO1	protein_coding	0.62684	0.75289	0.00340281	0.0005823	0.00103997
GPX8	protein_coding	-0.83507	-0.47404	0.00069192	0.0140439	0.00104402
TMEM132A	protein_coding	0.44555	0.95081	0.0492561	0.00034119	0.00104944
AADAC	protein_coding	1.43731	2.3305	0.0155653	0.0003611	0.00105003
KCNMA1	protein_coding	1.42258	1.77488	0.00418878	0.00053161	0.00105003
FBXO43	protein_coding	-1.241	-1.80321	0.00606004	0.0004605	0.00105726
RPA3	protein_coding	-0.78209	-1.16703	0.00806573	0.00042065	0.00106049
AGPAT5	protein_coding	-0.40595	-0.69393	0.0170256	0.00036214	0.00106118
ITPKC	protein_coding	0.84548	0.87776	0.00195511	0.00092789	0.00106185
FRAS1	protein_coding	0.59923	0.989	0.0158538	0.00036764	0.00106285
HIST1H3E	protein_coding	-0.62655	-1.26275	0.0262513	0.00035112	0.00106627
NUDT21	protein_coding	-0.46756	-0.72226	0.0112178	0.00039449	0.00106676
TUBB	protein_coding	-0.56146	-0.65112	0.00318015	0.0006484	0.00107543
SORL1	protein_coding	1.90935	2.38882	0.00443	0.00054306	0.00107996
CBX1	protein_coding	-0.50323	-0.63875	0.00460051	0.00054076	0.00108845
GPD2	protein_coding	-0.42281	-0.76529	0.0217041	0.00036797	0.00109778
FBXO44	protein_coding	0.85806	1.2233	0.00826815	0.00044178	0.00109816
TMEM63B	protein_coding	0.62914	0.83611	0.00582191	0.00050801	0.00111602
SAT1	protein_coding	1.10351	0.74452	0.00083563	0.0063575	0.00111712
YEATS4	protein_coding	-0.42947	-0.94286	0.0468236	0.00036797	0.00111833
FADS3	protein_coding	0.62594	0.81779	0.00542379	0.00052766	0.00112468
SCN10A	protein_coding	-1.41712	-1.65339	0.00270028	0.00078229	0.00113047
ZNF862	protein_coding	0.70605	1.10608	0.0130225	0.00040698	0.00113047
ARHGEF2	protein_coding	0.66321	0.3451	0.00074758	0.0242201	0.00113317
PARP6	protein_coding	0.59758	0.65254	0.00253452	0.00083666	0.00113317
CCDC136	protein_coding	1.11746	1.14438	0.0019959	0.00104016	0.00113317
MXD3	protein_coding	-1.39729	-1.63247	0.00280565	0.00078192	0.00114644
ENKUR	protein_coding	1.58791	1.91596	0.00394856	0.0006312	0.00116314
CNRIP1	protein_coding	-0.45515	-0.60311	0.00573918	0.00054076	0.00116521
PSMD12	protein_coding	-0.48696	-0.55404	0.00311542	0.00075459	0.00116521
ARL6IP6	protein_coding	-0.81756	-0.77693	0.00162517	0.00140819	0.00116612
CPEB4	protein_coding	0.67975	0.50206	0.00096717	0.00440606	0.00116612
FSTL3	protein_coding	0.48609	0.8452	0.0213636	0.00039771	0.00116612
TMEM150A	protein_coding	0.73218	0.97993	0.00627597	0.00052704	0.00116612
DBI	protein_coding	-0.82024	-0.49995	0.00081194	0.0108555	0.00116782
CLGN	protein_coding	-1.35609	-1.4236	0.00202389	0.00109331	0.00117205
TLL1	protein_coding	0.9022	0.87922	0.00175898	0.00129763	0.00117496
BRI3BP	protein_coding	-0.56838	-0.79047	0.00672183	0.00052128	0.00117498
COQ3	protein_coding	-0.78763	-1.05744	0.00560278	0.00055916	0.0011788
STK36	protein_coding	0.79464	0.83712	0.00227578	0.00099105	0.0011789
CCDC15	protein_coding	-0.49653	-1.07719	0.0448506	0.00039449	0.00118247
SYNCRIP	protein_coding	-0.40232	-0.58595	0.00946474	0.00047205	0.00118247
FTL	protein_coding	0.59386	0.38827	0.00086978	0.00779532	0.00119379
MLIP	protein_coding	-0.95539	-0.63985	0.00088618	0.00691499	0.00119622
BTG3	protein_coding	-0.58389	-0.68009	0.00330454	0.00076402	0.00120691
ZER1	protein_coding	0.76073	0.66013	0.00130696	0.00217837	0.00120691
NETO2	protein_coding	-0.38187	-0.75444	0.0339841	0.00040582	0.00121546
ACADM	protein_coding	-0.55065	-0.63396	0.00326745	0.00078062	0.00121836
NEGR1	protein_coding	-0.77573	-0.42378	0.00081194	0.0190219	0.00122127
FAM98B	protein_coding	-0.3632	-0.76558	0.0440102	0.00040698	0.00122225
ARL6IP1	protein_coding	-0.42847	-0.79099	0.0272173	0.00041537	0.00123542
TNFRSF14	protein_coding	1.07148	0.80671	0.00102475	0.00444705	0.00125241
TXNDC16	protein_coding	-0.82576	-0.97271	0.00343882	0.00077735	0.00125363
BUB3	protein_coding	-0.40479	-0.77235	0.0327328	0.0004246	0.00127814
RPF1	protein_coding	-0.41061	-0.70216	0.0185077	0.00044682	0.00127979
MKNK2	protein_coding	0.67621	0.47663	0.00098154	0.00611829	0.00129878
SPATA7	protein_coding	0.85889	0.76525	0.00149814	0.00208858	0.00131131
CCDC59	protein_coding	-0.47019	-0.73577	0.0130848	0.00049275	0.00132025
TUBG1	protein_coding	-0.52317	-0.69671	0.00618942	0.00061295	0.00132025
HLA-DPB1	protein_coding	-0.7285	-1.20106	0.0137202	0.00048845	0.00132218
KLHL23	protein_coding	-0.73327	-0.91142	0.00443157	0.00072052	0.00132651
MTRNR2L8	protein_coding	-1.11152	-0.71985	0.00095005	0.00873159	0.00132651
SLC6A8	protein_coding	0.59564	0.74823	0.00517677	0.00067027	0.00132842
CD34	protein_coding	-1.02754	-0.52603	0.0008625	0.0258719	0.00133216
CDK2	protein_coding	-0.70863	-0.74285	0.00243772	0.00115061	0.00133682
EXOSC2	protein_coding	-0.6966	-0.83608	0.00393008	0.00078229	0.00133976
WDR27	protein_coding	0.49321	0.67256	0.00764511	0.00058905	0.00135155
BCL2A1	protein_coding	-1.56995	-0.75363	0.00086978	0.0297682	0.00135228
ALCAM	protein_coding	-0.61301	-0.53962	0.00154113	0.00214481	0.00135458
PRKDC	protein_coding	-0.55457	-0.35799	0.00096717	0.00902941	0.00135609
DDX46	protein_coding	-0.32431	-0.5524	0.0209681	0.00047108	0.00135655
ENPP1	protein_coding	-0.81797	-0.71014	0.00147837	0.00238191	0.00136303
NEXN	protein_coding	-0.63027	-0.86941	0.00741215	0.00060587	0.0013694
LAMA3	protein_coding	-0.61531	-0.8619	0.00786673	0.00060137	0.00137928
NUDT15	protein_coding	-0.99667	-0.98504	0.00207898	0.00143006	0.00138005
UBN2	protein_coding	0.59622	0.64289	0.00292227	0.00105347	0.00138405
LSM5	protein_coding	-0.55069	-0.90658	0.016125	0.00050677	0.00138762
YPEL3	protein_coding	0.84884	0.96851	0.0035286	0.00090216	0.00138762
ABLIM3	protein_coding	0.56707	0.4481	0.00126213	0.00362765	0.00139274
CISD2	protein_coding	-0.78987	-0.62726	0.00128453	0.0035363	0.0014137
FAF1	protein_coding	-0.45543	-0.6621	0.00996774	0.00057726	0.0014137
AK5	protein_coding	-0.64568	-0.93294	0.0091507	0.00059071	0.00141489
ZFHX2	protein_coding	1.1502	1.39964	0.00493456	0.0007649	0.00142765
RIOK1	protein_coding	-0.33163	-0.67847	0.0456328	0.00047801	0.00142871
PIK3CD	protein_coding	0.66844	0.91268	0.00815983	0.00061895	0.00142964
NDUFAF4	protein_coding	-0.54444	-0.76828	0.0085059	0.00061021	0.00143003
CASP8AP2	protein_coding	-0.40714	-0.84201	0.0446265	0.00047922	0.00143023
XRCC5	protein_coding	-0.49341	-0.55029	0.00340536	0.00097867	0.00143408
CBX5	protein_coding	-0.68826	-0.47198	0.00106381	0.00714528	0.00144828
CDIP1	protein_coding	0.88544	0.68037	0.00122537	0.00447744	0.00144828
LBR	protein_coding	-0.51926	-0.64458	0.0052175	0.0007649	0.00144982
SRP9	protein_coding	-0.67436	-0.80702	0.00457618	0.00083067	0.00146748
UBE2V2	protein_coding	-0.46939	-0.68101	0.0101741	0.00060587	0.00148473
ZNF160	protein_coding	0.59456	0.69328	0.00410967	0.00091741	0.00150056
LRRC59	protein_coding	-0.5689	-0.44136	0.00130336	0.00412781	0.00150239
DMTN	protein_coding	0.62307	0.91266	0.0117927	0.00060137	0.00152621
ALDH18A1	protein_coding	-0.61668	-0.30605	0.00097686	0.0337299	0.00153027
ATP13A1	protein_coding	0.65386	0.66574	0.00256938	0.0014057	0.00153027
SLC6A4	protein_coding	1.25876	1.53283	0.00517677	0.0008296	0.00153027
ZNF610	protein_coding	1.44322	2.74987	0.0432808	0.00051719	0.00153027
SIDT2	protein_coding	0.4831	0.70095	0.0111759	0.00061021	0.00153027
RMI2	protein_coding	-0.75018	-1.28068	0.0186589	0.00055916	0.00155386
DPF2	protein_coding	0.65313	0.4185	0.00106124	0.0112291	0.00155997
GMPS	protein_coding	-0.413	-0.67587	0.018443	0.00056285	0.00155997
ANGPTL4	protein_coding	1.41391	1.24608	0.00170031	0.00256227	0.00155997
SPDYE2	protein_coding	0.64212	0.97844	0.0144178	0.00058905	0.00155997
TIMM21	protein_coding	-0.53951	-0.79734	0.0115298	0.00062548	0.00157315
VAT1	protein_coding	0.47623	0.52935	0.00368197	0.00109139	0.00160083
MPHOSPH6	protein_coding	-0.44391	-0.64205	0.0108609	0.0006484	0.0016045
PLXNA2	protein_coding	0.32793	0.65093	0.0449145	0.00054076	0.0016046
KCTD13	protein_coding	0.7788	0.87958	0.00385485	0.00107124	0.00160736
RUNDC3B	protein_coding	-0.95723	-1.0993	0.0036792	0.0011075	0.00160841
TANC2	protein_coding	0.39204	0.69741	0.0287285	0.00055276	0.00161264
SRSF10	protein_coding	-0.392	-0.58956	0.0130848	0.00062206	0.00161434
ARHGAP19	protein_coding	-0.64291	-1.02451	0.0158167	0.00060587	0.00163291
SAMD4A	protein_coding	0.37501	0.5889	0.0166225	0.00060137	0.00163291
CALU	protein_coding	-0.60119	-0.33302	0.00103308	0.0216928	0.00163615
SERTAD4	protein_coding	-1.16253	-1.09485	0.00211711	0.00202348	0.00164335
ARHGAP18	protein_coding	-0.55423	-0.49593	0.00192105	0.00239938	0.0016443
UACA	protein_coding	-0.67032	-0.41275	0.00109547	0.0132079	0.0016443
PARP3	protein_coding	0.65925	0.93872	0.0109703	0.00066998	0.00164438
DUOX1	protein_coding	0.87405	1.16597	0.00826815	0.00074731	0.00164454
ABCG1	protein_coding	0.65738	0.91112	0.00982973	0.00070319	0.00166109
DPYSL3	protein_coding	-0.61237	-0.41531	0.00122168	0.00845128	0.00168738
UBE2N	protein_coding	-0.58778	-0.50252	0.00173033	0.00304387	0.00168738
NIP7	protein_coding	-0.42847	-0.62183	0.0114801	0.00068267	0.00168741
ACRC	protein_coding	0.78858	1.1945	0.0150437	0.00063648	0.00169942
LENG8	protein_coding	0.49921	0.88832	0.0299689	0.00058457	0.00170969
NOL11	protein_coding	-0.38915	-0.67568	0.0248716	0.00060149	0.00172752
HMGB3	protein_coding	-0.74012	-0.91399	0.00587954	0.00092789	0.00173202
CENPO	protein_coding	-0.48335	-0.88124	0.0290379	0.00059942	0.00173809
NUP54	protein_coding	-0.41328	-0.76176	0.0311386	0.00059465	0.00173809
MBD5	protein_coding	0.49365	0.72577	0.0130225	0.00068737	0.00175627
PLEKHG1	protein_coding	0.47977	0.75305	0.0175861	0.00064624	0.0017716
CLN8	protein_coding	0.60548	0.68287	0.00413869	0.00117606	0.00177484
FLNC	protein_coding	0.6122	0.59347	0.00257782	0.00188526	0.00178805
ARHGAP21	protein_coding	0.51507	0.47829	0.00225597	0.0022457	0.00179247
MRPL35	protein_coding	-0.29677	-0.57384	0.0411787	0.0006037	0.00179509
ASNSD1	protein_coding	-0.35274	-0.63311	0.0295584	0.00061855	0.0018083
SNAI1	protein_coding	0.91499	0.92682	0.00292227	0.0016702	0.00180928
MTRNR2L6	protein_coding	-0.78255	-0.53479	0.00130336	0.0086445	0.00182024
FCHSD1	protein_coding	0.65608	0.93102	0.0116332	0.00074916	0.00182218
STRA13	protein_coding	-0.77008	-0.7184	0.00225159	0.00235795	0.00182866
MFAP2	protein_coding	0.47115	0.81281	0.0275404	0.00062905	0.00183068
GCNT1	protein_coding	-0.74455	-0.68582	0.00218706	0.0024461	0.00183197
ZFYVE1	protein_coding	0.51557	0.71377	0.0103594	0.00077802	0.00183197
INSIG1	protein_coding	-0.61284	-0.33147	0.00116901	0.025918	0.00183708
HNRNPA2B1	protein_coding	-0.60155	-0.60121	0.00294425	0.0017419	0.00184563
CCT5	protein_coding	-0.55287	-0.67046	0.00596032	0.00101965	0.00184819
MAMDC2	protein_coding	1.03065	1.45494	0.0118202	0.00076161	0.00185185
SNX29	protein_coding	0.60896	0.60166	0.00278368	0.00187741	0.00185957
PKP4	protein_coding	-0.52999	-0.45111	0.0019114	0.00335427	0.00187482
ANKRD36C	protein_coding	-0.62471	-0.53238	0.00193382	0.00335142	0.00189873
KLHL21	protein_coding	0.76791	0.37484	0.00119855	0.0455965	0.00190594
MGRN1	protein_coding	0.56812	0.62181	0.00396483	0.00136482	0.0019066
PI4K2B	protein_coding	-0.65393	-0.68828	0.00338418	0.00158295	0.00191684
KIAA0319L	protein_coding	0.3254	0.60454	0.0380133	0.00064972	0.00193271
AHNAK2	protein_coding	0.50202	0.69363	0.0108331	0.00082612	0.00193659
ZNF462	protein_coding	0.43762	0.60968	0.0111178	0.00081943	0.00193974
TUBGCP3	protein_coding	-0.43396	-0.64224	0.0133895	0.00077712	0.00195634
VKORC1L1	protein_coding	-0.51645	-0.41471	0.00175845	0.00445333	0.0019584
RAD54L	protein_coding	-0.66868	-1.1222	0.0206311	0.00070589	0.00195848
CCT2	protein_coding	-0.39829	-0.64263	0.0210587	0.00070589	0.00196522
PSMD14	protein_coding	-0.48662	-0.61286	0.00729977	0.00099942	0.00196522
TEX30	protein_coding	-0.50342	-1.00306	0.0440969	0.00067027	0.00199802
POC1A	protein_coding	-0.66776	-1.37244	0.0461579	0.00067027	0.00199891
TMEM131	protein_coding	0.58624	0.27835	0.0012464	0.0482455	0.00199891
UAP1	protein_coding	-0.53355	-0.66757	0.00718613	0.00103315	0.0020018
PAQR6	protein_coding	1.19926	1.41468	0.00565402	0.00117232	0.00201285
SPC24	protein_coding	-1.21676	-1.56811	0.00712562	0.00104969	0.00201866
SPAG1	protein_coding	-0.6262	-0.68739	0.00403102	0.0014716	0.00201866
WEE1	protein_coding	-0.40938	-0.61251	0.0146324	0.00079953	0.00203663
TPP1	protein_coding	0.36907	0.63692	0.0293226	0.00071099	0.00205533
ASPH	protein_coding	-0.51967	-0.29369	0.00129827	0.023	0.00206491
CEP85	protein_coding	-0.44928	-0.74988	0.0223768	0.00074916	0.00207321
GGCT	protein_coding	-0.38633	-0.66703	0.0265621	0.00073117	0.00207576
UBE2H	protein_coding	0.45505	0.43228	0.00279066	0.00236053	0.00207932
TSKU	protein_coding	0.72242	0.80674	0.00461389	0.00140819	0.00208293
NINJ1	protein_coding	0.86092	0.72734	0.00199926	0.00398943	0.0020868
TAP1	protein_coding	0.98549	0.62959	0.00137773	0.0148636	0.0020868
SLBP	protein_coding	-0.50685	-0.58886	0.00539424	0.00129646	0.00209544
HMGN1	protein_coding	-0.44198	-0.53508	0.00642115	0.00116148	0.00209756
ALG14	protein_coding	-0.82839	-0.68113	0.00193845	0.00440606	0.00210931
FAM136A	protein_coding	-0.65855	-0.65825	0.00325886	0.00202348	0.00210931
CEP97	protein_coding	-0.49565	-0.65013	0.00874156	0.00102507	0.00211704
NCBP1	protein_coding	-0.4464	-0.52077	0.00565402	0.00127667	0.00211906
RPA1	protein_coding	-0.44512	-0.76389	0.0273931	0.0007493	0.00212217
ZSCAN18	protein_coding	0.69195	1.16636	0.0281502	0.0007493	0.00212792
MLXIP	protein_coding	0.43131	0.55691	0.00877209	0.00104382	0.00215647
RAN	protein_coding	-0.62208	-0.73296	0.00608657	0.00127458	0.00219151
ZNF211	protein_coding	0.62386	0.90153	0.0142471	0.00088649	0.00219151
BCAS3	protein_coding	0.47295	0.79701	0.0278082	0.00077315	0.00220191
PCDH18	protein_coding	-1.15338	-1.11472	0.00292227	0.00249525	0.00220415
RPL36AL	protein_coding	-0.57406	-0.51593	0.00252874	0.00307426	0.00220503
CYP2S1	protein_coding	1.00166	0.77207	0.00179528	0.0063056	0.00220719
FLYWCH1	protein_coding	0.88161	0.73202	0.00203479	0.0045187	0.00221887
MICAL1	protein_coding	0.47228	0.83165	0.0339835	0.0007649	0.00222057
RGAG4	protein_coding	1.15896	0.99426	0.00217472	0.00405417	0.00223847
XRCC6	protein_coding	-0.4296	-0.63272	0.0155822	0.00088956	0.00223847
CBR3	protein_coding	-0.94032	-1.10825	0.00533259	0.00144553	0.00224278
PRDX3	protein_coding	-0.67307	-0.61085	0.00262406	0.00304396	0.00224278
PTP4A2	protein_coding	-0.50268	-0.34643	0.00160151	0.00981136	0.00224278
ZFYVE26	protein_coding	0.55917	0.40881	0.00170154	0.0077408	0.00224278
XPO1	protein_coding	-0.3089	-0.54805	0.0341951	0.00077583	0.00224485
PLEKHM1	protein_coding	0.74006	0.72433	0.00323803	0.00238495	0.00226836
ANKZF1	protein_coding	0.7967	0.79736	0.00339113	0.00222038	0.00227136
NPAS2	protein_coding	0.453	0.602	0.0103707	0.00105347	0.00228651
DNAH1	protein_coding	0.67123	1.15835	0.0328746	0.00081047	0.00233072
ADAMTS18	protein_coding	0.55768	0.67292	0.00706692	0.00131422	0.0023642
MRPL13	protein_coding	-0.39797	-0.57929	0.0147828	0.00096877	0.0023642
MBOAT1	protein_coding	-0.8963	-1.09598	0.00671014	0.00136565	0.00239155
PTMA	protein_coding	-0.50326	-0.66949	0.0108297	0.00109404	0.00239499
NXT1	protein_coding	-0.66021	-0.75485	0.00544836	0.00158295	0.00240196
SPCS3	protein_coding	-0.54636	-0.37093	0.00166946	0.0111576	0.00240196
SERBP1	protein_coding	-0.46351	-0.56322	0.00756133	0.00130975	0.00241327
FAM21C	protein_coding	0.52903	0.31713	0.00154	0.0201246	0.00241602
PSMD1	protein_coding	-0.44274	-0.51083	0.00610637	0.00147005	0.00241607
TUBB4B	protein_coding	-0.73927	-0.95652	0.00973459	0.00116549	0.00242147
BLOC1S2	protein_coding	0.64584	0.42508	0.00162517	0.0138675	0.00242398
MMP14	protein_coding	0.44334	0.64836	0.0161535	0.00097867	0.00242613
CHN1	protein_coding	-0.70788	-0.4151	0.00154	0.0218732	0.0024287
TRIO	protein_coding	0.49792	0.4859	0.00343464	0.00247543	0.00243494
ALS2CL	protein_coding	0.87494	0.85841	0.00341899	0.00255491	0.00247338
GRAMD4	protein_coding	0.78553	1.07956	0.01274	0.00107785	0.0024745
ZNFX1	protein_coding	0.53775	0.49128	0.00292227	0.00329198	0.00248829
SCAMP5	protein_coding	0.81613	1.13452	0.0134117	0.00106724	0.00248999
TM4SF18	protein_coding	-0.59	-0.55391	0.00318431	0.00296859	0.00249376
STK32B	protein_coding	0.68507	0.65975	0.0033089	0.00276753	0.00250241
PGF	protein_coding	0.56244	0.81791	0.0162157	0.00102231	0.00250612
GNPNAT1	protein_coding	-0.55194	-0.59483	0.00475818	0.00196315	0.00254581
PAPLN	protein_coding	0.66773	0.90479	0.0122036	0.00113989	0.00255469
MED21	protein_coding	-0.3535	-0.67901	0.0474099	0.00088362	0.00255986
DSTN	protein_coding	-0.62336	-0.31095	0.0015522	0.0447196	0.00256363
CDC27	protein_coding	-0.37865	-0.56392	0.0178683	0.0010224	0.00257187
CYB5B	protein_coding	-0.57556	-0.46206	0.00225597	0.00558462	0.0025792
SIPA1L2	protein_coding	0.56897	0.56148	0.00365413	0.00260078	0.00258715
HN1L	protein_coding	-0.57499	-0.57852	0.00394281	0.00242533	0.00260725
EPS8L2	protein_coding	1.56037	1.60276	0.00418878	0.00231151	0.00261855
PLEKHG5	protein_coding	0.50364	0.84453	0.0306769	0.00094542	0.00264323
PGP	protein_coding	-0.70174	-0.58204	0.00243772	0.00516312	0.00264634
ANK3	protein_coding	-0.44639	-0.62781	0.0134117	0.00115608	0.00266489
ILF2	protein_coding	-0.52403	-0.58855	0.00606089	0.00176754	0.00269782
LCAT	protein_coding	0.75921	1.04891	0.0138309	0.00115783	0.00269782
NUP50	protein_coding	-0.44771	-0.66416	0.0180319	0.00107124	0.00269782
CA8	protein_coding	-0.82845	-1.08956	0.00882546	0.0014057	0.00270167
PDGFC	protein_coding	0.67608	0.59915	0.00286763	0.00408685	0.00270366
SRP72	protein_coding	-0.35633	-0.52618	0.0179869	0.00108123	0.00271258
ZNF425	protein_coding	1.36898	1.6643	0.00833662	0.00145629	0.00271369
TMEM60	protein_coding	-0.42631	-0.64185	0.0179274	0.00108884	0.00272509
H3F3B	protein_coding	-0.38484	-0.68211	0.038093	0.00095988	0.00272637
LRRC8D	protein_coding	-0.50731	-0.47322	0.003307	0.00333313	0.00272637
NOLC1	protein_coding	-0.39034	-0.55155	0.0151823	0.00115061	0.00272637
NRM	protein_coding	-0.51355	-0.7594	0.0166103	0.00111669	0.00272637
NUP188	protein_coding	-0.38543	-0.48146	0.00921095	0.00140392	0.00272637
TIMM17A	protein_coding	-0.62521	-0.34753	0.00166924	0.0297534	0.00272637
BUD13	protein_coding	-0.63199	-0.66357	0.00461182	0.00229969	0.00272776
MTHFR	protein_coding	0.61252	0.7874	0.0103594	0.00133354	0.00273078
BAZ2A	protein_coding	0.39754	0.47429	0.00782969	0.00154461	0.00273338
YWHAE	protein_coding	-0.59966	-0.40277	0.0019114	0.0129932	0.00275148
PTPRE	protein_coding	0.41951	0.48304	0.00685315	0.00171522	0.00277688
IER3IP1	protein_coding	-0.61224	-0.64098	0.00467197	0.00235216	0.00277886
SULT1B1	protein_coding	-0.83693	-0.84358	0.00406742	0.00268123	0.00278491
BZW1	protein_coding	-0.3057	-0.56372	0.0443258	0.00097644	0.00278828
TRMU	protein_coding	-0.46686	-0.73727	0.0222831	0.00107208	0.00279054
KIAA0020	protein_coding	-0.37835	-0.56638	0.0188807	0.00112468	0.00281312
COPS3	protein_coding	-0.42245	-0.68381	0.0260604	0.00105657	0.00282814
BBC3	protein_coding	1.30253	1.34719	0.00461744	0.00243419	0.00282814
SFXN2	protein_coding	-0.90148	-0.50899	0.00179038	0.0282371	0.00288733
ZBTB4	protein_coding	0.34926	0.58467	0.0320243	0.00104382	0.00288733
PDE2A	protein_coding	0.64523	0.97849	0.0214064	0.00112183	0.00288831
TLR4	protein_coding	-0.57988	-0.45329	0.00241159	0.00695782	0.00288831
DFNA5	protein_coding	0.58249	0.52682	0.00325886	0.00399434	0.00291139
GOLGA8A	protein_coding	0.43455	0.55494	0.0106118	0.00143912	0.00292357
MINK1	protein_coding	0.55686	0.66613	0.00818841	0.00165527	0.00292384
PLD3	protein_coding	0.50915	0.73959	0.0179425	0.00119145	0.00294907
MAST4	protein_coding	0.34224	0.55482	0.0286399	0.00108884	0.00296016
MARK4	protein_coding	0.49901	0.70846	0.0163473	0.00123438	0.00296226
RETSAT	protein_coding	0.75388	0.57254	0.00228883	0.00854373	0.00296494
TTN	protein_coding	0.38095	0.57115	0.0206732	0.00116188	0.00296883
MN1	protein_coding	0.87066	1.19342	0.0146113	0.00129681	0.00298449
VBP1	protein_coding	-0.38246	-0.61482	0.0258691	0.00113015	0.00301477
SMCO4	protein_coding	-1.07638	-0.73844	0.00207898	0.0125445	0.00301802
RGS12	protein_coding	0.49597	0.5783	0.00759949	0.00182681	0.00302904
CSRP2	protein_coding	-0.70107	-1.08438	0.0201314	0.00120565	0.00306372
LANCL2	protein_coding	-0.38457	-0.62928	0.027969	0.0011355	0.00306719
CCNE1	protein_coding	-0.98642	-0.8951	0.00334239	0.00422581	0.00307821
COQ2	protein_coding	-0.54355	-0.76699	0.0151658	0.00132953	0.00309107
HYLS1	protein_coding	-0.55692	-0.83798	0.0194749	0.00125146	0.00313739
MAP3K10	protein_coding	1.26984	1.56303	0.0099642	0.00163362	0.00313764
TMEM173	protein_coding	0.71945	0.55973	0.00255367	0.00782763	0.00313764
SMAGP	protein_coding	-0.45515	-0.66803	0.017888	0.00129646	0.0031594
ATG4C	protein_coding	-0.51732	-0.90185	0.0343539	0.00114647	0.00318611
BMP2	protein_coding	0.71305	0.55865	0.00258707	0.00791228	0.00318611
TMC7	protein_coding	0.75125	0.95062	0.0109678	0.00158295	0.00318611
TOM1	protein_coding	0.8053	0.62053	0.00251849	0.00849365	0.00318611
UMPS	protein_coding	-0.49667	-0.72241	0.017888	0.00130626	0.00318611
SSB	protein_coding	-0.33295	-0.53915	0.028435	0.00117606	0.00319257
NUDCD1	protein_coding	-0.47376	-0.62822	0.0126072	0.00148623	0.00319509
SMYD2	protein_coding	-0.57763	-0.35244	0.00200945	0.0223251	0.00321034
UBR4	protein_coding	0.51239	0.32902	0.00207898	0.017836	0.00321199
ZNF175	protein_coding	0.55843	0.36018	0.00207898	0.0180806	0.00321696
TOE1	protein_coding	-0.54776	-0.74481	0.013182	0.00147616	0.00323074
LDHB	protein_coding	-0.62981	-0.51401	0.00292227	0.00631975	0.00323384
ICAM1	protein_coding	0.91019	1.18948	0.0127444	0.00151866	0.00325396
SVIL	protein_coding	0.35578	0.49626	0.0163473	0.00138421	0.00325396
NRXN3	protein_coding	-0.76734	-0.40985	0.00195511	0.0386432	0.00325537
BCAT1	protein_coding	-0.5453	-0.36285	0.00219482	0.0154439	0.00329319
DDX1	protein_coding	-0.29669	-0.5003	0.0353669	0.00117606	0.00329319
ABCD1	protein_coding	0.84032	1.0147	0.00941097	0.00181684	0.00329455
ING2	protein_coding	-0.63737	-0.88401	0.0136651	0.0015026	0.00330621
PIF1	protein_coding	-0.72283	-1.11512	0.0212067	0.00131121	0.00331032
ABHD10	protein_coding	-0.53969	-0.65029	0.00909089	0.00187804	0.00331613
ZNF662	protein_coding	1.27094	1.48365	0.00830066	0.00201047	0.00331613
SACS	protein_coding	-0.30435	-0.50618	0.0340269	0.00119642	0.00331707
CPEB2	protein_coding	0.77399	0.48736	0.00208999	0.0217109	0.00332559
NPM1	protein_coding	-0.47219	-0.71339	0.0231487	0.00129681	0.00332648
KCNJ2	protein_coding	0.52465	0.69368	0.0134117	0.00155729	0.00337083
CCDC14	protein_coding	-0.33497	-0.55885	0.0339835	0.00123254	0.00341308
NFATC4	protein_coding	0.49701	0.77077	0.026174	0.00129646	0.00341308
RPL39L	protein_coding	-0.8099	-1.20808	0.0190052	0.00139806	0.00341308
C16orf59	protein_coding	-0.78565	-1.42798	0.0337862	0.00123727	0.00342367
ZNF506	protein_coding	0.5975	0.90323	0.0238714	0.00132953	0.00344761
TRAF4	protein_coding	0.86879	0.77167	0.0035286	0.00503486	0.0034509
CEP57L1	protein_coding	-0.49432	-0.6859	0.0154355	0.00153303	0.00348764
PHACTR2	protein_coding	-0.47812	-0.25575	0.00207898	0.0405227	0.00351737
ZNF418	protein_coding	0.98521	1.10232	0.00740949	0.00238191	0.0035405
ZW10	protein_coding	-0.40795	-0.64979	0.0273902	0.00132953	0.0035405
FBXL18	protein_coding	0.78676	0.68127	0.00341899	0.00573081	0.0035702
DDX39A	protein_coding	-0.48057	-0.8848	0.0494678	0.00123841	0.00358142
PPA1	protein_coding	-0.64838	-0.53309	0.00325886	0.00683843	0.00364012
BANF1	protein_coding	-0.43049	-0.51281	0.00938385	0.00212567	0.00364897
FAM227A	protein_coding	1.03816	1.27393	0.0108694	0.00193692	0.00365525
ROBO3	protein_coding	0.66471	0.78671	0.00937497	0.00213641	0.00365744
KIF26B	protein_coding	1.16165	1.31173	0.00795878	0.00239938	0.00367744
MYO1F	protein_coding	1.33007	1.60395	0.0103594	0.00202348	0.00368177
YES1	protein_coding	-0.47562	-0.61557	0.0133156	0.00176737	0.00369101
RPP30	protein_coding	-0.42604	-0.58477	0.0158509	0.00163625	0.00369758
SAMD14	protein_coding	1.07282	1.50096	0.0187942	0.00153844	0.00369758
MCMBP	protein_coding	-0.44242	-0.57072	0.0128717	0.00181382	0.00371336
TPM3	protein_coding	-0.46588	-0.41406	0.00392747	0.00507945	0.00372378
CCT6A	protein_coding	-0.41076	-0.5458	0.0149934	0.00171342	0.00374579
PRKACB	protein_coding	-0.46555	-0.52873	0.00833662	0.00239938	0.00375442
APOBEC4	protein_coding	1.14829	0.98851	0.0035286	0.00630098	0.00377293
CRIPAK	protein_coding	0.64001	0.83133	0.0136548	0.00180167	0.00377681
BCL2L1	protein_coding	0.51073	0.49294	0.00490413	0.00392905	0.00377978
TSGA10	protein_coding	0.66125	1.09126	0.0364996	0.00136482	0.0037851
CHEK2	protein_coding	-0.58111	-0.82281	0.0175861	0.00163446	0.00380221
NCKAP5L	protein_coding	0.60652	0.88018	0.0215512	0.00153469	0.00381133
PPIA	protein_coding	-0.72367	-0.54312	0.00294886	0.0102468	0.00381133
C14orf80	protein_coding	-0.81979	-1.24891	0.0196376	0.00158295	0.0038141
ING3	protein_coding	-0.49781	-0.77885	0.0263027	0.00147005	0.00383996
RRP15	protein_coding	-0.34287	-0.568	0.0353274	0.00140392	0.00384969
FAM21A	protein_coding	0.49655	0.33163	0.00257782	0.0178241	0.00386168
PDLIM7	protein_coding	0.41188	0.58128	0.0193879	0.00162224	0.00386168
TMEM71	protein_coding	-1.25864	-0.77795	0.00249759	0.022514	0.00389963
PDE3B	protein_coding	-0.91552	-0.75317	0.00340797	0.00757099	0.00391335
AIF1L	protein_coding	-0.97723	-0.76416	0.00325886	0.00894391	0.00395989
VAMP1	protein_coding	0.63976	0.87267	0.0172487	0.00176067	0.00396456
PSRC1	protein_coding	-1.22779	-1.70513	0.0146113	0.001889	0.0039762
DYNLL1	protein_coding	-0.56143	-0.36312	0.00260794	0.0201185	0.00398594
EIF1AX	protein_coding	-0.37456	-0.65147	0.0435778	0.00143379	0.00403052
MAPKBP1	protein_coding	0.58244	0.61462	0.00678342	0.00321884	0.00404362
AP5Z1	protein_coding	0.83213	0.89521	0.00729977	0.00304387	0.00405363
UBA2	protein_coding	-0.38592	-0.60947	0.0300492	0.00153223	0.0040553
ELMO1	protein_coding	0.39428	0.54548	0.0185077	0.00177932	0.00408435
USP13	protein_coding	-0.31507	-0.53731	0.0408181	0.0014645	0.00408571
SIN3B	protein_coding	0.48269	0.56554	0.0100501	0.0024538	0.00411549
HBS1L	protein_coding	-0.31229	-0.53149	0.041847	0.00148623	0.00416767
IL18BP	protein_coding	0.50461	0.64174	0.0136901	0.0021284	0.00421221
TMSB15A	protein_coding	-1.17002	-1.75917	0.0210587	0.00177136	0.00421221
TTLL7	protein_coding	-0.59892	-0.65078	0.0076253	0.00318951	0.00425299
KDM6B	protein_coding	0.78039	0.65381	0.00381039	0.0076841	0.00427656
IMPA2	protein_coding	-0.97886	-1.07488	0.00756133	0.00326363	0.00428722
PALLD	protein_coding	0.42078	0.4701	0.00883901	0.00285922	0.00429025
FBRS	protein_coding	0.57168	0.65379	0.0095061	0.00272173	0.00430092
CNN3	protein_coding	-0.5047	-0.3292	0.00283679	0.0205958	0.00432269
C4orf27	protein_coding	-0.62966	-0.68433	0.00790167	0.00327414	0.00440032
ERBB2	protein_coding	0.65667	0.58276	0.00441394	0.00630032	0.00440032
GSTCD	protein_coding	-0.57176	-0.76711	0.0161256	0.00208611	0.00440032
ZNF423	protein_coding	0.67205	1.00998	0.0275404	0.00173284	0.00441316
ZNF471	protein_coding	0.88009	1.03856	0.0108297	0.0025838	0.00441353
ATL2	protein_coding	-0.39252	-0.68074	0.043993	0.00158295	0.00441963
BCORL1	protein_coding	0.51558	0.63881	0.0128717	0.00235795	0.00441963
SEMA3A	protein_coding	-0.6801	-1.09153	0.0261389	0.00176499	0.00441963
C2CD5	protein_coding	-0.30699	-0.53447	0.0453402	0.00158295	0.00442831
PML	protein_coding	0.45378	0.54122	0.0113566	0.00252554	0.00442831
SDC1	protein_coding	1.31292	0.94991	0.00318891	0.0151737	0.00446461
ZNF623	protein_coding	0.42675	0.54048	0.0140806	0.00228351	0.00446854
SEH1L	protein_coding	-0.54551	-0.60768	0.00889762	0.00306245	0.00448304
HADH	protein_coding	-0.52415	-0.64553	0.0122204	0.00245573	0.0044834
FBL	protein_coding	-0.6024	-0.77957	0.0155238	0.00219729	0.00448428
SLC25A40	protein_coding	-0.53412	-0.80654	0.025788	0.00181296	0.00449811
ATG16L2	protein_coding	0.52691	0.69932	0.0169934	0.00212638	0.00451838
PDLIM3	protein_coding	-0.47239	-0.55796	0.0106747	0.00273625	0.00452791
HGS	protein_coding	0.7129	0.40951	0.00278368	0.0393372	0.00459793
SFXN1	protein_coding	-0.51605	-0.41882	0.00394296	0.00897845	0.00465476
PPP1CC	protein_coding	-0.35475	-0.56158	0.0346468	0.00176499	0.00467361
C1RL	protein_coding	0.59185	0.8921	0.0290851	0.00184008	0.00469385
NUP37	protein_coding	-0.52973	-0.71973	0.0180319	0.00220352	0.00474487
C5orf45	protein_coding	0.8728	0.85396	0.00618942	0.00470877	0.00476203
PNRC2	protein_coding	-0.33529	-0.56946	0.0433413	0.00173284	0.00476203
HLA-B	protein_coding	0.65644	0.486	0.00346493	0.0135893	0.00476691
RP11-231C14.4	protein_coding	0.59841	0.82511	0.0206732	0.00210624	0.00477212
EXOC6	protein_coding	-0.54104	-0.51139	0.00587954	0.00520466	0.00483537
EFCAB13	protein_coding	0.6996	0.88936	0.0152156	0.00242533	0.00483823
AMPH	protein_coding	-0.86676	-0.64872	0.00359149	0.0129801	0.00485113
SNRPD3	protein_coding	-0.5714	-0.52	0.00533876	0.00607694	0.00487043
GIGYF1	protein_coding	0.76448	0.74193	0.00617303	0.00495591	0.00487449
USP35	protein_coding	0.64032	0.95461	0.0288191	0.00193692	0.00487449
BZW2	protein_coding	-0.42771	-0.42025	0.00648002	0.00468245	0.0048755
ZNF444	protein_coding	0.63462	0.75033	0.0118522	0.00287002	0.00491594
ZNF493	protein_coding	0.62954	0.9683	0.0327113	0.00190579	0.00494956
ARMC9	protein_coding	0.37845	0.64099	0.0462011	0.00178737	0.00495172
SLC26A11	protein_coding	0.95672	0.79514	0.00429425	0.00901471	0.00498373
SPINT1	protein_coding	0.86851	0.81201	0.00559066	0.00592634	0.00499045
C9orf9	protein_coding	1.07639	0.8992	0.00432148	0.00898266	0.00499379
RHBDL2	protein_coding	0.89655	1.15541	0.0166044	0.00242533	0.004998
SH3PXD2A	protein_coding	0.35942	0.58354	0.0396586	0.00185708	0.00500515
PSMD7	protein_coding	-0.45257	-0.51323	0.0105851	0.00321219	0.00501336
TNFRSF10A	protein_coding	0.66217	0.5569	0.00443157	0.00860266	0.00501368
KIAA0556	protein_coding	0.66101	0.49678	0.00368197	0.0137478	0.00502729
RPP40	protein_coding	-0.67886	-0.67546	0.00671014	0.0048358	0.00506164
ZNF81	protein_coding	0.67028	0.43276	0.00325886	0.0259523	0.00507206
AGTRAP	protein_coding	0.68175	0.56466	0.0043695	0.00927334	0.00507263
ZNF511	protein_coding	-0.73248	-0.56057	0.00390075	0.0124909	0.00509955
DOK5	protein_coding	-0.77564	-0.43979	0.00310985	0.0408906	0.00512103
FOXO1	protein_coding	0.55939	0.39067	0.00349312	0.01793	0.00513577
TNIP1	protein_coding	0.54322	0.44229	0.00433779	0.00980488	0.00514165
ZNF385A	protein_coding	0.90973	0.82203	0.00540667	0.00691499	0.00519507
MTHFSD	protein_coding	0.71573	0.59616	0.00454075	0.00926462	0.00520823
VPS39	protein_coding	0.39477	0.41871	0.00882546	0.00394982	0.005216
ADAMTS1	protein_coding	-0.56376	-0.34236	0.00325886	0.0317523	0.00521937
GRN	protein_coding	0.4078	0.67615	0.0445754	0.00192609	0.00521937
MXI1	protein_coding	0.75127	0.84117	0.0104718	0.003465	0.00523264
SLC35E2B	protein_coding	0.41181	0.54089	0.018201	0.00248048	0.00523264
SLC38A7	protein_coding	0.61972	0.50764	0.00444279	0.00984195	0.00524185
PNPLA2	protein_coding	0.69033	0.61419	0.00534174	0.00732362	0.0052535
ZNF697	protein_coding	0.55058	0.3304	0.00325886	0.0351491	0.0052543
ITGB8	protein_coding	0.55482	0.59903	0.00937497	0.00391003	0.00534909
PITPNM1	protein_coding	0.89939	0.83641	0.00598915	0.00634185	0.00534921
RAB27A	protein_coding	-0.56373	-0.47475	0.00487552	0.00888857	0.00536951
KIAA0195	protein_coding	0.57647	0.54637	0.00635099	0.00589979	0.00538376
C9orf40	protein_coding	-0.77253	-1.13392	0.0238227	0.00235795	0.0054082
HMGN5	protein_coding	-0.78838	-0.94257	0.0118745	0.00333313	0.0054082
METAP1	protein_coding	-0.31099	-0.48745	0.0354367	0.0021059	0.0054082
TRA2B	protein_coding	-0.38584	-0.4523	0.0127229	0.00321642	0.00543352
EIF5AL1	protein_coding	-0.53444	-0.46896	0.00542379	0.00786091	0.00550429
SLC43A3	protein_coding	-0.42295	-0.69048	0.0399434	0.00210624	0.00551834
DYRK1B	protein_coding	0.67343	0.92837	0.0231602	0.00244372	0.00555331
SLC39A8	protein_coding	-0.78305	-0.73182	0.00628804	0.00648677	0.00559036
MAPRE3	protein_coding	0.97905	1.14395	0.0127444	0.00334207	0.00559787
MYL5	protein_coding	0.7613	1.24416	0.0459475	0.00209268	0.0056043
EPHX1	protein_coding	0.80632	0.65244	0.00461744	0.0112291	0.0056117
MB21D1	protein_coding	-0.55548	-0.81562	0.0262142	0.00239938	0.00564547
EEF1E1	protein_coding	-0.56042	-0.5994	0.00937497	0.00434459	0.00565549
TDP1	protein_coding	-0.47254	-0.69041	0.0274132	0.00238191	0.00566128
LRIG2	protein_coding	0.48557	0.59819	0.0153886	0.00305467	0.00568023
ERH	protein_coding	-0.77871	-0.74293	0.00685315	0.00614603	0.00572647
GRIPAP1	protein_coding	0.58926	0.61337	0.00885334	0.00462778	0.00572912
SNRPF	protein_coding	-0.7061	-0.63296	0.00596032	0.00759851	0.00575325
RNF167	protein_coding	0.60823	0.37554	0.00351387	0.0337722	0.00575537
PM20D2	protein_coding	-0.57144	-0.41497	0.00409997	0.0168491	0.00577084
C1GALT1C1	protein_coding	-0.60603	-0.58961	0.0073006	0.00583239	0.00578396
AUNIP	protein_coding	-0.66756	-1.11671	0.0399809	0.0022457	0.00580807
RHNO1	protein_coding	-0.49852	-0.70048	0.0237316	0.00257221	0.00580807
CENPH	protein_coding	-0.75254	-1.13504	0.0299156	0.00241663	0.00585532
DCTPP1	protein_coding	-0.54636	-0.64982	0.0133895	0.003465	0.00587044
ERRFI1	protein_coding	-0.33813	-0.51976	0.034846	0.00234764	0.00587623
TRIM32	protein_coding	0.48013	0.3749	0.00464337	0.0129981	0.00590304
NDUFAF3	protein_coding	-0.52844	-0.4424	0.00533259	0.00991536	0.00592093
C12orf57	protein_coding	-0.67205	-0.60409	0.00609993	0.00778642	0.00592292
MAP3K5	protein_coding	-0.54804	-0.62657	0.0118402	0.00385354	0.00593341
PDHB	protein_coding	-0.41803	-0.44335	0.00993217	0.00448778	0.00593341
LIN52	protein_coding	-0.4326	-0.72478	0.0449742	0.00225064	0.00593416
SHC1	protein_coding	0.44459	0.61387	0.0245731	0.00261035	0.00593416
SERINC2	protein_coding	0.60781	0.73349	0.0149194	0.00334207	0.00596219
KIAA1683	protein_coding	1.81595	1.56324	0.00555407	0.00931978	0.00596844
FAM160B2	protein_coding	0.77409	0.82821	0.0101659	0.00449447	0.0060005
RAB8B	protein_coding	-0.29204	-0.48364	0.0468903	0.00227312	0.00601514
VDAC1	protein_coding	-0.45253	-0.41868	0.00685315	0.00688151	0.00601614
DOCK10	protein_coding	-0.53131	-0.29423	0.00357053	0.0496337	0.00603764
FAM20A	protein_coding	0.93176	0.87892	0.00699696	0.00680841	0.00603922
ZBTB48	protein_coding	0.79756	0.66984	0.00541421	0.0103515	0.00605826
RALGDS	protein_coding	0.59588	0.69469	0.0133792	0.00366838	0.0060585
DOCK6	protein_coding	0.42724	0.59148	0.0251312	0.00268508	0.00606323
PNO1	protein_coding	-0.53932	-0.52643	0.00789234	0.00609779	0.00613849
PCBP4	protein_coding	0.55173	0.73137	0.0214363	0.00291025	0.00614444
NFKB2	protein_coding	0.95586	0.57178	0.00368197	0.0426432	0.0061486
STK39	protein_coding	-0.45506	-0.45159	0.00836232	0.00588988	0.00627037
SSH3	protein_coding	0.8165	0.84451	0.0095061	0.00520772	0.00634427
POLR3G	protein_coding	-0.45423	-0.66001	0.0287285	0.00271007	0.00636906
SNRPB2	protein_coding	-0.32529	-0.52244	0.0424236	0.0024461	0.00636906
WDR4	protein_coding	-0.60844	-0.63905	0.00982463	0.00515293	0.00639459
ABCA5	protein_coding	0.57706	0.54626	0.00756133	0.00696812	0.00640955
TGFB1	protein_coding	0.43954	0.66769	0.0365739	0.00254431	0.00640955
PAPOLA	protein_coding	-0.33988	-0.4907	0.0305124	0.00269251	0.00642652
POP7	protein_coding	-0.73227	-0.80426	0.0111126	0.00462147	0.00642652
NME1	protein_coding	-0.78562	-0.48258	0.00396483	0.0347464	0.00646951
NAPB	protein_coding	0.43846	0.60461	0.0258333	0.00289477	0.00649555
PXN	protein_coding	0.40371	0.45155	0.0126188	0.00425199	0.00649555
GABPB1	protein_coding	-0.3635	-0.58795	0.0439349	0.00248759	0.00650129
JAK3	protein_coding	1.18525	1.04015	0.0062257	0.00936325	0.00650129
P4HA2	protein_coding	0.44256	0.53943	0.0166103	0.00360479	0.00658807
B3GNT5	protein_coding	-0.39142	-0.48113	0.0168234	0.00364957	0.00670745
ZNF274	protein_coding	0.63756	0.47769	0.00490413	0.0175183	0.00670745
PSMA3	protein_coding	-0.51312	-0.5029	0.00877209	0.00630612	0.00671349
SMS	protein_coding	-0.47286	-0.50848	0.0113391	0.00488858	0.00672831
ZSCAN31	protein_coding	0.52495	0.7098	0.0245711	0.00308032	0.00673176
NRCAM	protein_coding	0.46224	0.35848	0.00533534	0.0145033	0.00674117
ZSWIM6	protein_coding	0.37364	0.52833	0.0293293	0.00289302	0.00674215
GNAI3	protein_coding	-0.38324	-0.46517	0.0168525	0.00367601	0.00674362
RHPN1	protein_coding	0.86312	1.28638	0.036602	0.0027057	0.00674883
NDST1	protein_coding	0.42616	0.54427	0.0201915	0.00336292	0.00675822
KCTD12	protein_coding	0.61028	0.59191	0.00862054	0.00654039	0.00677292
MGAT5B	protein_coding	1.02232	1.56986	0.0409052	0.00264579	0.0067732
RHBDD2	protein_coding	0.61519	0.43517	0.00461744	0.0221699	0.00678893
ZNF844	protein_coding	1.03668	0.83534	0.00553239	0.0137449	0.00682226
CTPS1	protein_coding	-0.40671	-0.49672	0.0170451	0.00371841	0.00683148
STX2	protein_coding	-0.44816	-0.36367	0.00581765	0.0125165	0.00683388
C17orf62	protein_coding	0.66635	0.6973	0.0106317	0.00544955	0.00688802
RCC2	protein_coding	-0.47351	-0.3746	0.00559066	0.0138822	0.0068881
ZDHHC9	protein_coding	0.38258	0.44845	0.0153928	0.00407528	0.0069065
CCDC113	protein_coding	0.84984	0.8009	0.00794157	0.00773939	0.006936
GTF2A2	protein_coding	-0.49523	-0.55155	0.0128092	0.00466226	0.00693903
SRGAP1	protein_coding	0.5056	0.38845	0.00539437	0.0156291	0.00694593
OSBPL7	protein_coding	0.62322	0.8602	0.0275404	0.00310804	0.00696788
SEPHS1	protein_coding	-0.46277	-0.54795	0.0155228	0.00410312	0.00697024
ENO1	protein_coding	-0.47553	-0.61366	0.021607	0.00342733	0.00699344
EID1	protein_coding	-0.51888	-0.4404	0.00650927	0.0107106	0.00701703
HSPA2	protein_coding	-0.51005	-0.72116	0.0270524	0.00317561	0.00701703
ARRB1	protein_coding	0.40835	0.50995	0.0191427	0.00367601	0.00703079
NIPA2	protein_coding	-0.42184	-0.44029	0.0108639	0.0055672	0.00703694
POP1	protein_coding	-0.48013	-0.52386	0.0120839	0.00507945	0.00707623
PMEPA1	protein_coding	0.35691	0.5786	0.0493898	0.00270358	0.00707877
RPA2	protein_coding	-0.646	-0.83874	0.0209979	0.00355013	0.00707877
NDUFA6	protein_coding	-0.58984	-0.48303	0.00609795	0.0125876	0.00710243
LTBR	protein_coding	0.49384	0.44797	0.00756133	0.00879698	0.007106
MAP3K12	protein_coding	0.60321	0.59482	0.00925235	0.00675868	0.007106
MAU2	protein_coding	0.52859	0.44209	0.00628155	0.0118819	0.007106
ZSWIM8	protein_coding	0.57687	0.50571	0.00695904	0.0100296	0.00713565
ANP32B	protein_coding	-0.46504	-0.64191	0.0280617	0.00321219	0.00714823
AGO4	protein_coding	0.4342	0.54615	0.0199665	0.00369322	0.00715925
GEMIN6	protein_coding	-0.44955	-0.7017	0.0399809	0.00289302	0.00718203
PSMA2	protein_coding	-0.51935	-0.48895	0.00843088	0.00774088	0.00718203
SERPINB8	protein_coding	-0.39992	-0.37191	0.00823246	0.00803407	0.00718203
TCP11L2	protein_coding	0.56782	0.76442	0.0258188	0.00335131	0.00720553
HMGN3	protein_coding	-0.61046	-0.54273	0.00731244	0.00957646	0.00721492
TMEM126B	protein_coding	-0.40172	-0.51398	0.0208899	0.00367669	0.00721492
ULK1	protein_coding	0.55862	0.74277	0.0246343	0.0034245	0.00722271
METTL7A	protein_coding	-0.76524	-0.7906	0.0103088	0.00630098	0.00723757
VDAC3	protein_coding	-0.52668	-0.47423	0.00771154	0.00902005	0.0072476
THSD1	protein_coding	0.56959	0.44942	0.00584185	0.015331	0.00726556
ABCA10	protein_coding	0.73615	1.1354	0.0432808	0.00290421	0.00727717
EZH1	protein_coding	0.46109	0.53146	0.0151466	0.00456412	0.00732435
BCAP29	protein_coding	-0.44356	-0.36198	0.0063331	0.0130267	0.00736006
CUL9	protein_coding	0.65773	0.70718	0.0122288	0.00544866	0.00736006
GPR108	protein_coding	0.6296	0.44724	0.00516573	0.0233215	0.00740402
ZNF383	protein_coding	0.78216	0.56255	0.0052175	0.022673	0.00742252
MRTO4	protein_coding	-0.59663	-0.71012	0.0164253	0.0044417	0.00745751
ZNF841	protein_coding	0.49003	0.56772	0.015632	0.00460138	0.00748065
MRPS6	protein_coding	-0.49406	-0.49136	0.00994749	0.00699854	0.00748736
PPP2CA	protein_coding	-0.33889	-0.4694	0.0294475	0.00335974	0.00751582
RANBP10	protein_coding	0.49953	0.37766	0.00568389	0.0184394	0.00755724
ATP5L	protein_coding	-0.63132	-0.46349	0.00556664	0.0198857	0.00757406
CEP170B	protein_coding	0.56805	0.71953	0.0214738	0.00388508	0.00757406
SPDYE1	protein_coding	0.72968	0.80775	0.0136838	0.00519877	0.0075904
MAPRE1	protein_coding	-0.43593	-0.51602	0.0173187	0.00446043	0.00763626
LMAN1	protein_coding	-0.46037	-0.32649	0.00541421	0.022673	0.00764103
CACNA2D1	protein_coding	-0.46076	-0.36367	0.00619771	0.0154555	0.00765713
ZMIZ2	protein_coding	0.46066	0.55515	0.0182644	0.00434689	0.00766208
SLC25A5	protein_coding	-0.52146	-0.68651	0.0251358	0.00368559	0.0076906
INADL	protein_coding	0.58895	0.5513	0.00876365	0.00864132	0.00771818
EPAS1	protein_coding	0.33385	0.48722	0.0363736	0.00327414	0.00772694
CTSA	protein_coding	0.36321	0.46863	0.0237316	0.00385354	0.00779709
SNRNP40	protein_coding	-0.46919	-0.62556	0.0253076	0.00374229	0.00780372
TRIM8	protein_coding	0.31857	0.49411	0.0450222	0.00313684	0.00780372
CXCR6	protein_coding	0.71821	0.96034	0.0268488	0.00367603	0.00780742
DIMT1	protein_coding	-0.3439	-0.48328	0.0308908	0.00350997	0.0078733
RNF213	protein_coding	0.39807	0.42291	0.0128421	0.00592133	0.00789626
EIF2B3	protein_coding	-0.51089	-0.57922	0.0150814	0.00518335	0.00792355
FEZ2	protein_coding	-0.35193	-0.44931	0.0225179	0.00410188	0.00800251
TBC1D3F	protein_coding	0.83267	0.53409	0.00506875	0.0383681	0.00803179
CEP68	protein_coding	0.34544	0.54154	0.0477105	0.00320932	0.00803992
SFMBT1	protein_coding	-0.74579	-0.69222	0.00882546	0.0093028	0.00804369
ZNF677	protein_coding	0.56997	0.43625	0.00615158	0.0186411	0.00807124
KCNMB2	protein_coding	1.51965	1.4603	0.00966327	0.00840157	0.0080868
BCCIP	protein_coding	-0.51145	-0.5928	0.0168864	0.00493374	0.00812499
KHNYN	protein_coding	0.49679	0.34485	0.00552567	0.0270652	0.00812499
LRSAM1	protein_coding	0.56707	0.82021	0.036463	0.00346262	0.00814397
ZNF337	protein_coding	1.13106	0.86218	0.0061008	0.0199681	0.00819211
PIP5K1C	protein_coding	0.38131	0.58701	0.0454197	0.00332562	0.00823057
TIMM10	protein_coding	-0.8027	-0.79874	0.0106317	0.00775486	0.0082344
TUBGCP5	protein_coding	-0.37941	-0.52883	0.0304869	0.00373519	0.00827585
UBE2S	protein_coding	-0.76936	-0.95989	0.0200857	0.00456522	0.00827585
IMPG2	protein_coding	0.84297	1.18054	0.0333829	0.00365978	0.00830359
DNAJA1	protein_coding	-0.35294	-0.50179	0.0348478	0.00361998	0.00832641
NF1	protein_coding	0.40125	0.4237	0.013137	0.00634853	0.00835463
SSRP1	protein_coding	-0.3948	-0.58142	0.0392206	0.00350104	0.00835568
NCOR2	protein_coding	0.60274	0.56745	0.00982973	0.00886144	0.00836239
NPIPB5	protein_coding	0.41753	0.58652	0.0338589	0.00367601	0.00836239
PORCN	protein_coding	0.77985	0.59352	0.00633	0.0201185	0.00846554
ACSL4	protein_coding	-0.39816	-0.41149	0.0126065	0.00684652	0.00850157
LRRC27	protein_coding	0.54056	0.74283	0.031181	0.0038482	0.00850528
MRPL48	protein_coding	-0.67713	-0.51892	0.00655	0.0188526	0.00851877
ACYP1	protein_coding	-0.63992	-0.77841	0.0196594	0.00483185	0.00853244
FGF5	protein_coding	-0.91502	-0.92276	0.0120616	0.0072728	0.00856377
LYRM2	protein_coding	-0.43352	-0.50761	0.0176727	0.00520772	0.00858225
TRIM3	protein_coding	0.5554	0.62925	0.0162476	0.0055672	0.00858231
ITFG3	protein_coding	0.40775	0.62578	0.0462258	0.00347381	0.00862428
FBXO22	protein_coding	0.46934	0.41488	0.00858685	0.0114825	0.00863554
TNFAIP1	protein_coding	0.29509	0.42581	0.0375474	0.00369322	0.00866479
PLCXD2	protein_coding	1.08909	0.86248	0.00685315	0.0181292	0.00869786
CD163L1	protein_coding	0.46327	0.57318	0.0219049	0.00469835	0.00876238
MBD1	protein_coding	0.45827	0.28106	0.00545815	0.0451553	0.00879397
RALGAPB	protein_coding	0.41	0.35115	0.00835648	0.0127652	0.00884115
ITPRIPL1	protein_coding	-0.95528	-1.28129	0.0247697	0.00450274	0.00885718
DRAM1	protein_coding	0.53561	0.39086	0.00640307	0.0235679	0.00892405
ZNF213	protein_coding	0.97918	0.72246	0.00640307	0.0236007	0.00892405
PCMT1	protein_coding	-0.41423	-0.50441	0.0211818	0.00498517	0.00898096
IPO5	protein_coding	-0.32175	-0.49617	0.0487064	0.00362747	0.00900498
FBXW4	protein_coding	0.60138	0.5757	0.0106317	0.00928926	0.00904686
RBCK1	protein_coding	0.576	0.4723	0.00775193	0.0157028	0.00905277
RUSC2	protein_coding	0.52925	0.41643	0.00725381	0.018143	0.00905553
TMEM127	protein_coding	0.41765	0.45944	0.0156812	0.00630098	0.00908527
MED12	protein_coding	0.37701	0.44066	0.0190235	0.00548191	0.0091455
SMAD7	protein_coding	0.78252	0.75622	0.010958	0.00911992	0.0091455
SNRPE	protein_coding	-0.58272	-0.61888	0.0139105	0.00703205	0.0091455
SCN3B	protein_coding	1.07162	1.19908	0.0166103	0.00609403	0.00916726
ZNF514	protein_coding	0.51729	0.51754	0.0120616	0.00826737	0.00918972
SHMT1	protein_coding	-0.56353	-0.71008	0.0233375	0.00490196	0.00920882
DMPK	protein_coding	0.85062	0.96911	0.0176526	0.00586795	0.00921318
DNAJC9	protein_coding	-0.61257	-0.69042	0.0160838	0.00632587	0.00921381
NDUFB6	protein_coding	-0.64269	-0.495	0.00718613	0.0197407	0.00921655
HHIPL1	protein_coding	1.16247	1.23315	0.0141711	0.00704473	0.00921655
NUP43	protein_coding	-0.37851	-0.56352	0.041861	0.00391695	0.0092771
MRPS28	protein_coding	-0.59138	-0.79936	0.0293293	0.00446999	0.00929408
CHD1L	protein_coding	-0.41118	-0.41517	0.0125972	0.00811843	0.00930595
HSP90B1	protein_coding	-0.39093	-0.45057	0.0188068	0.0057115	0.00930595
TOP3A	protein_coding	-0.36699	-0.5187	0.0348484	0.00419498	0.00931555
OAS2	protein_coding	0.86857	0.85745	0.0118202	0.00886144	0.00939204
NSMF	protein_coding	0.72994	0.68808	0.0106747	0.0101994	0.0094319
XPO4	protein_coding	-0.32886	-0.48347	0.042216	0.0040056	0.00946608
LCA5L	protein_coding	0.60995	0.89666	0.0431229	0.00399946	0.00949504
ZFPM1	protein_coding	1.10711	1.18433	0.0148977	0.00713821	0.00951873
TSC1	protein_coding	0.45849	0.28392	0.00598056	0.0457892	0.00954181
AEN	protein_coding	0.57826	0.55192	0.0112178	0.00975704	0.0095575
NOTCH2NL	protein_coding	0.4816	0.37317	0.00751031	0.0201185	0.00956711
ALK	protein_coding	0.98686	1.01667	0.0134117	0.00801248	0.00962939
ABCD4	protein_coding	0.35896	0.53023	0.0438142	0.00407459	0.00966305
GLO1	protein_coding	-0.34319	-0.50421	0.0420806	0.0041037	0.00966305
MASP2	protein_coding	0.59069	0.73628	0.0245711	0.00512435	0.00967536
MAVS	protein_coding	0.46714	0.51462	0.0165535	0.00668787	0.00968191
ADAMTS3	protein_coding	-0.69542	-0.85366	0.0214363	0.00560284	0.00975112
RHEB	protein_coding	-0.49118	-0.45253	0.0105993	0.0111273	0.00975112
TAF15	protein_coding	-0.37985	-0.47216	0.0246285	0.0051633	0.00975112
ABCC5	protein_coding	0.3859	0.47732	0.0241143	0.00524716	0.0097898
CCT8	protein_coding	-0.40682	-0.5897	0.0417585	0.00420438	0.00979387
ABCC1	protein_coding	0.39105	0.47846	0.0237316	0.00534453	0.00983475
DUSP23	protein_coding	-0.59941	-0.47483	0.00817423	0.0191984	0.0100076
PCDHB13	protein_coding	1.28131	1.67301	0.0308908	0.00483185	0.0100336
ISOC1	protein_coding	-0.39845	-0.56665	0.0372588	0.00450276	0.0100661
HOOK2	protein_coding	0.86456	0.91815	0.0154371	0.0076841	0.0100937
FKBP3	protein_coding	-0.51426	-0.37246	0.00728466	0.0266547	0.0101126
ZFP41	protein_coding	0.73026	0.6574	0.0103021	0.0127671	0.0101224
NTPCR	protein_coding	0.40226	0.5519	0.0351281	0.00464497	0.0101267
RBM3	protein_coding	-0.51876	-0.32555	0.00647775	0.0442202	0.010204
NRG4	protein_coding	0.79182	0.78041	0.0127309	0.00960889	0.0102269
CORO1C	protein_coding	-0.37053	-0.35046	0.0118745	0.0105594	0.0102338
RPS6KL1	protein_coding	0.62181	0.58522	0.0114678	0.0111576	0.0102448
ANKRD42	protein_coding	0.61863	0.59757	0.0122036	0.0103027	0.0103017
ACAT1	protein_coding	-0.53588	-0.46798	0.0100501	0.0139799	0.0103241
CEP63	protein_coding	-0.35472	-0.48536	0.0343777	0.00480868	0.0103383
NCAPH2	protein_coding	-0.58765	-0.81545	0.0336742	0.00488963	0.0103648
ANXA5	protein_coding	-0.36809	-0.34401	0.011819	0.0111388	0.0104575
ARAP1	protein_coding	0.6839	0.56834	0.00909089	0.0174656	0.0105553
ZNF180	protein_coding	-0.54193	-0.6225	0.0193879	0.00686115	0.0106026
CAND1	protein_coding	-0.29523	-0.43485	0.0461587	0.00447938	0.0106064
DUSP1	protein_coding	0.53407	0.62229	0.0211974	0.0064186	0.0106064
TTC21A	protein_coding	0.69429	0.95517	0.0368924	0.00480388	0.0106064
NUP85	protein_coding	-0.5281	-0.63845	0.0235081	0.00607978	0.0106627
EVC2	protein_coding	0.60224	0.45776	0.00808605	0.0240832	0.0106824
APOO	protein_coding	-0.53601	-0.50122	0.0117335	0.0117947	0.0106882
SUMO3	protein_coding	-0.4924	-0.53738	0.0175861	0.00758765	0.0107425
PLCD3	protein_coding	0.67233	0.58711	0.0103021	0.0149483	0.0108484
PARD3B	protein_coding	0.4147	0.43201	0.0156812	0.00854991	0.0108931
POLR3B	protein_coding	-0.29813	-0.45	0.0491123	0.00455009	0.0109021
SRPRB	protein_coding	-0.40851	-0.47054	0.0211578	0.00675223	0.0109196
NPIPB11	protein_coding	0.4483	0.64814	0.0442806	0.00469681	0.0109326
PGAP3	protein_coding	0.75866	0.9357	0.026174	0.00592386	0.0109326
CCDC62	protein_coding	0.95067	1.259	0.0338837	0.00521112	0.0109336
DDAH1	protein_coding	-0.31199	-0.4439	0.0422738	0.00479514	0.0109336
FJX1	protein_coding	-0.53401	-0.34261	0.00705413	0.0434286	0.0109336
HIVEP2	protein_coding	0.46103	0.40974	0.010777	0.0141733	0.0109336
GPR137C	protein_coding	-1.10868	-1.09124	0.0131921	0.0105051	0.0109336
AQP1	protein_coding	-1.92279	-1.22128	0.0071305	0.0414481	0.0109468
HNRNPA3	protein_coding	-0.49514	-0.51518	0.0159939	0.00854431	0.0109489
ARVCF	protein_coding	0.68256	0.61033	0.010887	0.0140626	0.0109897
SH3BGRL2	protein_coding	-0.43523	-0.48432	0.018845	0.00752544	0.0110441
ABCC10	protein_coding	0.44867	0.62527	0.0395039	0.00497335	0.0110544
ARID3A	protein_coding	0.83983	0.97343	0.021607	0.00683689	0.0111005
MPDU1	protein_coding	-0.51171	-0.38583	0.00839435	0.0248285	0.01111
ALG8	protein_coding	-0.44415	-0.36948	0.00986041	0.0176803	0.011176
NOP16	protein_coding	-0.56658	-0.61612	0.0177912	0.00803407	0.0111818
CDK20	protein_coding	0.98148	1.03445	0.0163473	0.00865312	0.0111907
DUSP8	protein_coding	0.97239	0.93783	0.0129931	0.0112345	0.0111907
CEP112	protein_coding	-0.45615	-0.4249	0.0122036	0.012371	0.0112135
NRAS	protein_coding	-0.36659	-0.42119	0.0215835	0.00696442	0.0112138
DHX15	protein_coding	-0.34037	-0.43917	0.0312315	0.0056199	0.0112259
ZNF629	protein_coding	0.61149	0.61716	0.0146836	0.00980278	0.0112378
CEP104	protein_coding	0.42481	0.33167	0.00889762	0.0223321	0.0112704
RNF215	protein_coding	0.58881	0.83311	0.0425046	0.00498517	0.0112756
SPPL2B	protein_coding	0.59765	0.75013	0.0285892	0.00596698	0.0113009
PFKFB2	protein_coding	0.67818	0.57152	0.0100856	0.0177769	0.0113405
EVC	protein_coding	0.51479	0.44563	0.0106403	0.0160142	0.0113733
MOB3A	protein_coding	0.45525	0.44169	0.0136695	0.0110402	0.0114057
FNDC9	protein_coding	1.83547	1.75439	0.0129512	0.0118789	0.0114265
TMEM63A	protein_coding	0.5226	0.61931	0.0238776	0.00675668	0.01144
CCDC121	protein_coding	-0.84105	-0.95684	0.0195685	0.00779532	0.0114444
MTMR3	protein_coding	0.43441	0.35129	0.00959801	0.0201904	0.0114868
PPM1G	protein_coding	-0.35403	-0.49757	0.0422075	0.00513946	0.0115099
HNRNPK	protein_coding	-0.32477	-0.37476	0.0223789	0.0071226	0.0115435
SUB1	protein_coding	-0.42294	-0.3949	0.01274	0.0125466	0.0115749
C3orf14	protein_coding	-0.46432	-0.60301	0.0307756	0.00593656	0.0115953
KLHL22	protein_coding	0.52845	0.70937	0.0360844	0.00553271	0.0116203
IPO9	protein_coding	-0.35064	-0.33287	0.0134021	0.0118496	0.0116797
PPP2R5B	protein_coding	0.67053	0.80431	0.0253076	0.00675503	0.0117131
SLC24A1	protein_coding	0.59916	0.50358	0.0103594	0.0182381	0.0117131
SOD1	protein_coding	-0.49984	-0.35579	0.00834937	0.0312401	0.0117131
NUDT1	protein_coding	-0.71807	-0.7742	0.0177548	0.00879703	0.0117359
AJUBA	protein_coding	0.50525	0.57288	0.0214363	0.00759014	0.0117455
ZNF772	protein_coding	0.5481	0.5732	0.0168234	0.00928926	0.011788
FLG	protein_coding	1.2373	1.78849	0.0475749	0.00512435	0.011818
IDH2	protein_coding	-0.62561	-0.44837	0.00843628	0.0309992	0.0118235
ENTPD4	protein_coding	0.308	0.44904	0.0486655	0.00516312	0.0119918
HIST1H2BN	protein_coding	-0.85514	-1.17628	0.0347276	0.00591406	0.0120339
ZBTB7B	protein_coding	0.91083	0.6533	0.00843088	0.0334318	0.0120618
HNRNPC	protein_coding	-0.4603	-0.42163	0.0128717	0.0136755	0.0121404
TLDC1	protein_coding	0.511	0.41707	0.0103021	0.0205291	0.0121626
CFB	protein_coding	0.96806	0.93953	0.0141291	0.01216	0.0121996
GTF2IRD1	protein_coding	0.63559	0.43444	0.00826815	0.0394557	0.0122319
ZNF22	protein_coding	-0.5283	-0.68619	0.0325652	0.00631975	0.0123154
ALDH1B1	protein_coding	-0.38937	-0.52648	0.036942	0.00593634	0.012325
TMEM200A	protein_coding	0.57457	0.52569	0.0128395	0.0143307	0.0123343
FANCL	protein_coding	-0.4607	-0.6201	0.0360132	0.00606311	0.0123866
NBPF10	protein_coding	0.37174	0.40644	0.0201144	0.00865237	0.0123866
CRY2	protein_coding	0.69357	0.48781	0.00855626	0.0362545	0.0124189
PHYKPL	protein_coding	0.35889	0.50382	0.0440102	0.00560537	0.0124216
DCXR	protein_coding	-0.58852	-0.51884	0.0120394	0.0162802	0.0125105
SSR1	protein_coding	-0.40712	-0.37838	0.0136167	0.0134416	0.0125105
ZNF419	protein_coding	0.62249	0.54772	0.0119872	0.0167011	0.0126053
TRAF1	protein_coding	1.03801	1.05258	0.0163473	0.0109173	0.0126086
ZNF600	protein_coding	0.52523	0.52368	0.0158538	0.0114487	0.0127155
CRTAC1	protein_coding	-0.62995	-0.63365	0.015973	0.0114442	0.0127676
TMEM70	protein_coding	-0.47382	-0.58411	0.0281346	0.00718427	0.0127719
SLC25A10	protein_coding	-0.69658	-0.91423	0.0311258	0.00682498	0.0128249
FOXO4	protein_coding	0.89661	0.94417	0.0184358	0.00997303	0.012908
GNA14	protein_coding	0.86706	0.71764	0.0108892	0.0216078	0.0129949
PSPC1	protein_coding	-0.34393	-0.4963	0.0485911	0.00572526	0.0129949
PPP1R3F	protein_coding	1.04292	0.93954	0.0128185	0.0160611	0.0130134
CDR2	protein_coding	-0.34564	-0.39596	0.0237316	0.0082653	0.0130484
MRPL47	protein_coding	-0.47773	-0.47967	0.0165525	0.0114786	0.0130733
SLC25A45	protein_coding	1.08799	1.06422	0.0154508	0.0124988	0.0130845
UFC1	protein_coding	-0.50348	-0.34536	0.00889762	0.038744	0.0130882
TRMT1	protein_coding	0.61726	0.4492	0.00938385	0.0333059	0.0131589
GOLT1B	protein_coding	-0.43745	-0.45826	0.0185077	0.0103515	0.0131831
UQCR10	protein_coding	-0.50306	-0.32256	0.00850431	0.0494838	0.0131831
IGFBP1	protein_coding	-0.91316	-0.96099	0.0178444	0.0109093	0.0132672
SMIM13	protein_coding	-0.43752	-0.53589	0.0287285	0.00755053	0.0133293
MT-ATP8	protein_coding	-0.50503	-0.68717	0.0407441	0.00634185	0.013373
APOBEC3G	protein_coding	0.79289	0.88381	0.0223514	0.00894209	0.0133802
ZNF558	protein_coding	0.8563	0.9855	0.0247571	0.008365	0.0134385
CBX2	protein_coding	-0.62343	-0.57593	0.013922	0.0151721	0.0134742
HAUS3	protein_coding	-0.42884	-0.5553	0.034363	0.00698191	0.0135792
PARP10	protein_coding	1.19748	0.87204	0.0096542	0.0353274	0.0136862
SRC	protein_coding	0.48369	0.34749	0.00966327	0.0351631	0.0136862
AK2	protein_coding	-0.35427	-0.431	0.0298251	0.0076841	0.0137293
C3orf18	protein_coding	0.85673	1.00189	0.0265855	0.00827339	0.0137674
FBXO27	protein_coding	0.7846	1.06022	0.0424236	0.00646846	0.013786
CASP3	protein_coding	-0.32624	-0.45056	0.0448865	0.00634185	0.0137926
CELSR1	protein_coding	1.02909	1.29686	0.0342855	0.00735574	0.0140453
CEP164	protein_coding	0.54479	0.4178	0.0107233	0.0286377	0.0141185
TOMM40	protein_coding	-0.60496	-0.58332	0.0160139	0.0141434	0.0142643
TOLLIP	protein_coding	0.44797	0.54049	0.0299156	0.00811843	0.0143417
ORAI3	protein_coding	0.84385	0.81974	0.0164848	0.0137586	0.0143504
CCT4	protein_coding	-0.34479	-0.48391	0.0487064	0.00645105	0.0143783
ADK	protein_coding	-0.43412	-0.48841	0.0245148	0.00933778	0.0143963
SOX4	protein_coding	0.32766	0.46196	0.0493898	0.00642823	0.0143963
PSMD10	protein_coding	-0.44785	-0.36423	0.0120263	0.0232678	0.014442
FLCN	protein_coding	0.49393	0.39814	0.0117519	0.0248772	0.0144881
C1QBP	protein_coding	-0.435	-0.39352	0.0145495	0.0167187	0.0145124
GCSAM	protein_coding	0.87226	0.84984	0.0166225	0.0138901	0.0145124
LLPH	protein_coding	-0.37422	-0.53353	0.0491123	0.00654039	0.0145515
CCDC109B	protein_coding	-0.40269	-0.51443	0.0350244	0.00764475	0.0146228
EZR	protein_coding	-0.40456	-0.47331	0.0286179	0.00879757	0.0148739
GPR180	protein_coding	-0.48709	-0.41291	0.0130225	0.021193	0.0148739
FABP5	protein_coding	-0.68601	-0.48913	0.0104255	0.0375168	0.0149063
LRRC2	protein_coding	1.00788	0.80523	0.0117837	0.0271124	0.0149647
RIN1	protein_coding	0.73145	0.68797	0.0159728	0.0157065	0.0150168
PSMA5	protein_coding	-0.45951	-0.43495	0.0166225	0.0150617	0.0151726
HNRNPR	protein_coding	-0.34136	-0.47046	0.0477764	0.00697651	0.0152111
GHDC	protein_coding	0.61857	0.82745	0.0434026	0.00733493	0.0152976
WBP1	protein_coding	0.81537	1.01942	0.0353699	0.00808703	0.0153395
CHD6	protein_coding	0.34562	0.3774	0.0239097	0.0106068	0.0153634
PHTF2	protein_coding	-0.41441	-0.53766	0.0375761	0.00784142	0.0153634
RABL2B	protein_coding	0.50824	0.55871	0.024022	0.0105714	0.0153646
PDCD5	protein_coding	-0.4704	-0.41793	0.0146113	0.0188852	0.015381
SZT2	protein_coding	0.40123	0.49136	0.0332584	0.00843551	0.015381
RDH11	protein_coding	-0.40966	-0.31046	0.0115499	0.0311233	0.0153902
SIRT6	protein_coding	0.69083	0.78484	0.026559	0.00984655	0.0154415
CHCHD1	protein_coding	-0.63033	-0.49729	0.0122288	0.0279624	0.0157085
CAV1	protein_coding	-0.36449	-0.38942	0.0232238	0.0113142	0.0157454
SUPT6H	protein_coding	0.37327	0.26802	0.0110941	0.0375203	0.0157954
BTBD3	protein_coding	-0.3461	-0.38566	0.0256532	0.0105377	0.0158166
ZNF606	protein_coding	0.52059	0.60954	0.0295262	0.00941146	0.0158166
SYNGAP1	protein_coding	0.60121	0.77741	0.0401566	0.00794382	0.0158644
ZNF627	protein_coding	0.51998	0.51208	0.0185077	0.0145163	0.0158773
FAM184A	protein_coding	-0.90126	-0.85011	0.0166947	0.0166666	0.0159844
NBPF20	protein_coding	0.33629	0.4266	0.0378395	0.00825839	0.0159844
ACO1	protein_coding	-0.35607	-0.30077	0.0140159	0.0223286	0.0160663
PFDN2	protein_coding	-0.48511	-0.54753	0.0269152	0.0105077	0.0161527
PICK1	protein_coding	0.74979	0.77941	0.0214738	0.0127357	0.0161527
MTCH2	protein_coding	-0.44495	-0.35455	0.0128717	0.0271385	0.0161715
C1orf21	protein_coding	-0.54808	-0.71186	0.0393293	0.00829447	0.0162509
ACAD10	protein_coding	0.61269	0.77138	0.0375748	0.00852079	0.0163265
KCTD16	protein_coding	1.10874	0.8528	0.0120263	0.0336526	0.0163384
BSDC1	protein_coding	0.38584	0.50807	0.0433127	0.00803407	0.0163884
MME	protein_coding	-0.49043	-0.61391	0.035911	0.00878386	0.0163884
PUS7	protein_coding	-0.29302	-0.39567	0.0460799	0.00786923	0.016506
EPHA2	protein_coding	0.46423	0.45461	0.0194588	0.0149421	0.0166379
RHBDF2	protein_coding	0.62632	0.70384	0.0274132	0.0108555	0.0166445
ARRDC4	protein_coding	0.72949	0.81326	0.0265187	0.0111697	0.0166981
ZNF460	protein_coding	0.465	0.49989	0.0244215	0.0120268	0.0167561
KPNA3	protein_coding	-0.37103	-0.37105	0.0206311	0.0143484	0.0168084
ANGPT1	protein_coding	-0.8518	-1.19025	0.0452089	0.00811544	0.0168169
CBFB	protein_coding	-0.44124	-0.39676	0.0163473	0.0193074	0.0168406
USP48	protein_coding	-0.35632	-0.29259	0.0139586	0.0252972	0.0168406
SERPINE2	protein_coding	0.70811	0.51066	0.0118202	0.0411047	0.0170475
UBE2L3	protein_coding	-0.40234	-0.34192	0.0150487	0.0233424	0.0172856
ESD	protein_coding	-0.38649	-0.43632	0.0290799	0.0110029	0.0173129
ATXN7L1	protein_coding	0.48204	0.48216	0.020788	0.014967	0.0173528
ZNF200	protein_coding	-0.45771	-0.4569	0.0206732	0.0153252	0.0175152
SUPT5H	protein_coding	0.32011	0.41344	0.0432808	0.00886144	0.0177434
NCR3LG1	protein_coding	-0.46697	-0.37026	0.0138576	0.0300936	0.0178211
CLCN7	protein_coding	0.85753	0.6502	0.0129512	0.0365563	0.0179633
GNG12	protein_coding	-0.37087	-0.37315	0.022202	0.014839	0.0179633
RPH3AL	protein_coding	0.58213	0.59097	0.0220571	0.0149646	0.0180206
CLIP4	protein_coding	0.44493	0.36495	0.0146611	0.0274484	0.0180308
RP2	protein_coding	-0.4545	-0.39113	0.015973	0.0234222	0.0180569
CRMP1	protein_coding	0.46577	0.60798	0.0449742	0.00889603	0.0180631
VILL	protein_coding	0.72092	0.69464	0.0195738	0.0174656	0.0180725
SLC27A3	protein_coding	0.56146	0.73082	0.0448506	0.00892503	0.0180826
TPI1	protein_coding	-0.5741	-0.511	0.0171354	0.0210964	0.0181188
SNRNP35	protein_coding	-0.51789	-0.466	0.0171921	0.0211441	0.0181746
GOLM1	protein_coding	-0.40162	-0.32096	0.0144294	0.0293503	0.018204
CWC15	protein_coding	-0.37637	-0.43874	0.0325463	0.0110221	0.01821
ATG2A	protein_coding	0.62327	0.44475	0.0124479	0.0453342	0.0182839
PRDM1	protein_coding	0.6645	0.74576	0.0294835	0.0119305	0.018303
OXLD1	protein_coding	0.58492	0.66898	0.0311258	0.0115508	0.0184308
SLIRP	protein_coding	-0.51011	-0.40384	0.0142471	0.0315753	0.0184771
TBC1D15	protein_coding	-0.33312	-0.44582	0.0485745	0.00890819	0.0184881
SLC16A7	protein_coding	-0.47207	-0.53674	0.0300255	0.0120251	0.01857
MERTK	protein_coding	0.35131	0.35643	0.0231602	0.0152312	0.0185857
C12orf76	protein_coding	0.58373	0.5277	0.0177374	0.0214369	0.0185943
NPL	protein_coding	1.12	0.839	0.0131978	0.0395149	0.018606
NUS1	protein_coding	-0.38852	-0.3878	0.021967	0.0161719	0.0186266
PRRC2B	protein_coding	0.31814	0.37364	0.034546	0.0109895	0.0186266
TRIB1	protein_coding	0.33101	0.41681	0.0417472	0.00975704	0.0186266
WDTC1	protein_coding	0.43844	0.47523	0.0272772	0.0131703	0.0186266
PRKAR2B	protein_coding	-0.35655	-0.3909	0.0286135	0.0126694	0.01864
PPP2R5C	protein_coding	-0.33958	-0.344	0.0231487	0.0154616	0.0186887
RGS7BP	protein_coding	-0.93936	-0.78591	0.0151907	0.0289935	0.018766
LHX4	protein_coding	0.49733	0.38315	0.0139226	0.0356329	0.0188261
RRAGB	protein_coding	0.42221	0.47304	0.0301489	0.012371	0.018867
G3BP1	protein_coding	-0.34999	-0.39717	0.0318549	0.0118819	0.0188881
RNF44	protein_coding	0.4879	0.57282	0.0343777	0.0113142	0.0189438
MPP6	protein_coding	-0.38873	-0.37482	0.0208913	0.0181074	0.0190159
ATP5C1	protein_coding	-0.39986	-0.31739	0.0150069	0.0314226	0.0190666
CBLN3	protein_coding	1.03294	1.21195	0.034846	0.0113891	0.0191264
PCMTD1	protein_coding	0.53478	0.68841	0.0454392	0.00968629	0.0191286
ZNF438	protein_coding	-0.42988	-0.3299	0.0146113	0.0362701	0.0196032
NDUFAF2	protein_coding	-0.54935	-0.44187	0.0157932	0.0320101	0.0199679
TMC6	protein_coding	0.67599	0.74679	0.0303514	0.0135893	0.0200082
RING1	protein_coding	0.50071	0.42377	0.0170723	0.0280314	0.0203039
GCKR	protein_coding	0.62441	0.71694	0.0339835	0.0128149	0.0204196
TRIM35	protein_coding	0.46908	0.44914	0.021762	0.0197487	0.0204952
LAP3	protein_coding	-0.40956	-0.39949	0.0229239	0.0186137	0.0205181
CTIF	protein_coding	0.39371	0.43058	0.0303729	0.0143284	0.0206891
GABPA	protein_coding	-0.44626	-0.52424	0.035911	0.0125617	0.0207466
MMD	protein_coding	-0.61917	-0.63929	0.0259362	0.0166976	0.0207466
OAS1	protein_coding	0.77806	0.60141	0.0153623	0.038134	0.0207466
KATNAL1	protein_coding	-0.349	-0.29834	0.0179869	0.0270349	0.020758
MCC	protein_coding	0.33893	0.33929	0.0248663	0.0175702	0.0208393
CSF2RB	protein_coding	0.37575	0.46648	0.0436146	0.0112291	0.0208453
FHL3	protein_coding	0.42941	0.52412	0.0412984	0.0116015	0.0208781
CNNM2	protein_coding	0.85225	0.70608	0.0168067	0.0314948	0.0209197
SEL1L3	protein_coding	0.35406	0.39489	0.0327948	0.0138065	0.0210165
SIMC1	protein_coding	-0.42625	-0.50354	0.036784	0.0126694	0.021067
STAG3	protein_coding	0.77382	0.8171	0.0280617	0.0158808	0.021067
YBX1	protein_coding	-0.41447	-0.32116	0.015973	0.0364508	0.021067
POLL	protein_coding	0.55766	0.46971	0.0176168	0.0296722	0.0211095
APOBEC3F	protein_coding	0.56983	0.56651	0.0244658	0.0185116	0.0211527
ATP5F1	protein_coding	-0.35998	-0.32576	0.0207396	0.0232678	0.0213708
BAX	protein_coding	0.45659	0.5331	0.0370692	0.0129243	0.0213887
STAT6	protein_coding	0.31975	0.39052	0.0426614	0.0118743	0.0213887
RWDD1	protein_coding	-0.35579	-0.39471	0.0323528	0.0145089	0.021402
HELZ2	protein_coding	0.74741	0.68082	0.0205837	0.0239538	0.0215031
PRKCD	protein_coding	0.48635	0.52255	0.030092	0.0155505	0.0215877
MAGI3	protein_coding	-0.39959	-0.40179	0.0256713	0.0183467	0.0216246
DCAF12L1	protein_coding	-0.80078	-0.83844	0.0272772	0.017529	0.0218023
CHCHD4	protein_coding	-0.57158	-0.63618	0.032675	0.0148663	0.0218383
ALYREF	protein_coding	-0.50909	-0.48658	0.0231842	0.021193	0.0218436
R3HDM2	protein_coding	0.41389	0.34253	0.0178354	0.0319865	0.0218591
CLEC1A	protein_coding	-0.56163	-0.4164	0.0158538	0.0447974	0.022222
SRSF4	protein_coding	-0.38371	-0.32885	0.0196447	0.0283718	0.0223866
TUB	protein_coding	-0.6581	-0.51509	0.0169296	0.0386064	0.0225027
ZBTB40	protein_coding	0.36967	0.33294	0.0214064	0.0253063	0.0226412
ATG14	protein_coding	0.38985	0.4776	0.0445255	0.0125876	0.0226465
TRIM25	protein_coding	0.33358	0.30672	0.0225961	0.0235449	0.0227878
LARP1B	protein_coding	-0.35555	-0.33898	0.0244173	0.0219747	0.0230059
SLC12A6	protein_coding	0.35044	0.33514	0.0245711	0.0218287	0.0230232
GPRIN1	protein_coding	-0.81	-0.79797	0.0252808	0.0212161	0.0230819
ABCG2	protein_coding	-0.69779	-0.81554	0.0370198	0.0147033	0.0231829
RGL4	protein_coding	0.78194	0.78673	0.027244	0.0196236	0.0231939
CGGBP1	protein_coding	-0.3165	-0.35169	0.0350802	0.0154555	0.0233124
IPO13	protein_coding	0.46245	0.41461	0.0215276	0.0267665	0.0233527
TNKS	protein_coding	0.38431	0.28802	0.0168234	0.0445749	0.0234437
HPRT1	protein_coding	-0.45343	-0.5727	0.0480014	0.0126291	0.0234538
MTMR12	protein_coding	-0.35361	-0.3053	0.0206732	0.029094	0.0234614
NOL7	protein_coding	-0.52438	-0.64492	0.0436922	0.01343	0.0234691
SELK	protein_coding	-0.59755	-0.52361	0.0210587	0.0282223	0.0234915
ABCB9	protein_coding	0.70942	0.57072	0.0181326	0.0379075	0.023625
CUL1	protein_coding	-0.30874	-0.35484	0.0391653	0.0146035	0.023625
CUL7	protein_coding	0.40903	0.41615	0.0286135	0.0192428	0.0236283
MYO5B	protein_coding	0.75407	0.80443	0.03208	0.0172325	0.0236692
CHD2	protein_coding	0.30934	0.29874	0.026174	0.0216078	0.0237874
PSMA4	protein_coding	-0.43986	-0.5184	0.0424738	0.0141037	0.0238751
BOLA3	protein_coding	-0.46296	-0.47747	0.0294835	0.0191874	0.0239732
PANX2	protein_coding	0.9923	0.87689	0.021607	0.0286238	0.0240545
RSPH3	protein_coding	0.51595	0.60665	0.041861	0.0145163	0.0241867
DHX58	protein_coding	0.89721	0.95109	0.0320867	0.0181356	0.0243641
COA4	protein_coding	-0.49412	-0.39709	0.0193262	0.0374609	0.0245895
IPO11	protein_coding	-0.30721	-0.36023	0.0424738	0.0147357	0.0246541
TUBD1	protein_coding	-0.50711	-0.63689	0.0486655	0.0136789	0.0247979
ZNF182	protein_coding	0.61454	0.45943	0.0175257	0.0491788	0.0247979
BCL6	protein_coding	0.4065	0.41093	0.0293896	0.0204698	0.0248062
LINC00116	protein_coding	-0.55059	-0.48935	0.022443	0.0289348	0.0248124
WDR59	protein_coding	0.46938	0.35595	0.017888	0.0464463	0.0248867
CFDP1	protein_coding	-0.3943	-0.3291	0.0206732	0.0339186	0.0248875
SUCLG2	protein_coding	-0.42204	-0.40536	0.0265431	0.0232678	0.024912
NANP	protein_coding	-0.531	-0.45334	0.0214064	0.0324995	0.0251277
TCEB1	protein_coding	-0.41587	-0.31495	0.0183916	0.046273	0.0254074
PABPC1L	protein_coding	0.56159	0.55227	0.0281225	0.0225506	0.0254744
C14orf79	protein_coding	0.81527	0.88837	0.0356681	0.017831	0.025553
ZNF621	protein_coding	0.38966	0.39659	0.0306107	0.020682	0.025553
ENDOV	protein_coding	0.59836	0.65287	0.035911	0.0178291	0.0256165
STAT3	protein_coding	0.28783	0.31765	0.0378736	0.0171579	0.0257337
ITGA6	protein_coding	-0.29061	-0.30404	0.0338268	0.0191984	0.025819
PDE4B	protein_coding	0.43135	0.47291	0.0375052	0.0175986	0.0260045
TIMM8B	protein_coding	-0.59422	-0.44628	0.0187903	0.0485445	0.0262069
LZTS2	protein_coding	0.44788	0.47728	0.0347276	0.0191137	0.026294
IRF7	protein_coding	0.8189	0.64849	0.0196594	0.0439473	0.0262949
POP5	protein_coding	-0.38864	-0.4617	0.0446706	0.0156548	0.0262949
HAUS4	protein_coding	-0.5165	-0.64206	0.0485911	0.0150163	0.0264873
NAGA	protein_coding	-0.35736	-0.37413	0.0338111	0.0201629	0.0265912
ZNF586	protein_coding	0.4209	0.50262	0.0467904	0.0154453	0.0265958
RAD23B	protein_coding	-0.3242	-0.31345	0.0286636	0.0241026	0.0266515
TMEM67	protein_coding	0.57911	0.51894	0.0244395	0.0302071	0.0267235
UBASH3B	protein_coding	-0.35484	-0.32867	0.0265855	0.0270484	0.026814
SMG6	protein_coding	0.36502	0.3304	0.0253076	0.0289685	0.0268251
OSBPL5	protein_coding	0.53154	0.55245	0.0338111	0.0208538	0.0270231
FAR1	protein_coding	-0.35585	-0.31823	0.0251313	0.0299508	0.0270873
HNRNPH3	protein_coding	-0.45181	-0.37492	0.0223471	0.0365596	0.0271929
NUDT5	protein_coding	-0.41499	-0.37815	0.0260304	0.0289496	0.0272919
EEF2	protein_coding	0.39336	0.29893	0.0200857	0.0478273	0.0274546
PRMT1	protein_coding	-0.39885	-0.36177	0.0260604	0.0295519	0.0275822
CCBE1	protein_coding	-0.85535	-0.80582	0.0280617	0.0266413	0.0275826
CYP1A1	protein_coding	-0.65489	-0.69377	0.0354367	0.0204155	0.0275826
MR1	protein_coding	0.83487	0.90017	0.036784	0.0197487	0.0275826
SSBP1	protein_coding	-0.42501	-0.35861	0.0234603	0.0357014	0.0278719
C21orf58	protein_coding	-0.65607	-0.66534	0.03208	0.0236067	0.0282379
FN3KRP	protein_coding	-0.50103	-0.51909	0.0344367	0.0220226	0.0282379
CARHSP1	protein_coding	-0.49468	-0.39337	0.0215276	0.0442202	0.0282975
CATSPER1	protein_coding	0.9793	0.95624	0.03044	0.025509	0.0284323
NPIPB4	protein_coding	0.44318	0.52698	0.0493519	0.0168188	0.0287425
IL4R	protein_coding	0.43142	0.50282	0.0472838	0.0175127	0.0288192
PLD2	protein_coding	0.47141	0.47897	0.0339569	0.0233154	0.0288192
UGP2	protein_coding	-0.31141	-0.35759	0.045527	0.017947	0.0288192
MRPL20	protein_coding	-0.38513	-0.3862	0.0328746	0.0241054	0.0288384
CKLF	protein_coding	-0.5365	-0.49672	0.0280855	0.0295945	0.0289071
DCDC2B	protein_coding	0.94315	0.8447	0.0263649	0.0330125	0.0291036
LTB4R	protein_coding	0.56858	0.62306	0.0409216	0.0200968	0.0292247
TLE4	protein_coding	0.39301	0.36146	0.0283784	0.0306241	0.0294549
RNF123	protein_coding	0.60847	0.5397	0.0265499	0.0340075	0.0295488
ARHGAP27	protein_coding	0.45465	0.52148	0.0460808	0.0185683	0.0295533
FGD4	protein_coding	-0.33334	-0.39084	0.0492397	0.0180806	0.0298832
C7orf43	protein_coding	0.68245	0.64046	0.029889	0.0298046	0.0300788
CLEC2B	protein_coding	-0.50371	-0.54137	0.0393293	0.0218898	0.0300788
MBNL3	protein_coding	-0.472	-0.55041	0.0475764	0.0186547	0.0300788
EIF4E	protein_coding	-0.36589	-0.41458	0.044896	0.0195781	0.0300897
DTX3	protein_coding	0.53205	0.57891	0.0412801	0.0211679	0.0301612
EMC10	protein_coding	0.48719	0.50789	0.0372588	0.0231462	0.0302417
HARS2	protein_coding	0.4	0.32006	0.0233375	0.0462195	0.0302526
TRIM69	protein_coding	-0.45747	-0.40745	0.027424	0.0342582	0.0302526
KHDRBS1	protein_coding	-0.28824	-0.33197	0.048549	0.0186721	0.0302547
ADSL	protein_coding	-0.37451	-0.43292	0.0477105	0.0189355	0.0302814
KLF4	protein_coding	0.90506	0.74196	0.0238714	0.0447039	0.0304046
CDC42EP2	protein_coding	0.44982	0.42289	0.0304025	0.0299153	0.0304467
MRPS17	protein_coding	-0.53336	-0.43918	0.0245711	0.0426432	0.0305713
TMED7	protein_coding	-0.34213	-0.32536	0.0314454	0.0287887	0.0305948
KCNK1	protein_coding	0.84745	0.74004	0.0270995	0.0371931	0.0310762
ELOVL5	protein_coding	-0.31696	-0.24928	0.0238534	0.0484156	0.0313026
VCPIP1	protein_coding	0.33771	0.28531	0.0262328	0.040072	0.0313643
CDC26	protein_coding	-0.75024	-0.6901	0.0299734	0.0336526	0.0319879
MRPL54	protein_coding	-0.6056	-0.5439	0.0291698	0.0353771	0.0320701
CBFA2T2	protein_coding	0.44163	0.45967	0.0393293	0.0246064	0.0322399
DPY30	protein_coding	-0.32091	-0.35433	0.0449742	0.0220867	0.0324871
ZNF490	protein_coding	0.59092	0.62946	0.0416883	0.0238201	0.0326883
NHS	protein_coding	1.08938	1.21215	0.0471876	0.0215074	0.0326918
CALCRL	protein_coding	-0.34872	-0.33973	0.0353342	0.0284705	0.0328052
NANS	protein_coding	-0.46482	-0.4761	0.038093	0.026269	0.032864
PSMB5	protein_coding	-0.30882	-0.30958	0.0372145	0.0270144	0.0328936
ANGEL1	protein_coding	0.40264	0.39948	0.0360385	0.0281146	0.0329957
CAMTA1	protein_coding	-0.42416	-0.34647	0.0265621	0.0468751	0.0335487
ALS2CR12	protein_coding	0.89172	0.80024	0.0302058	0.0373651	0.0336802
KAT2B	protein_coding	-0.46781	-0.42225	0.0307334	0.0362814	0.0336802
HINT1	protein_coding	-0.35301	-0.33559	0.0346468	0.0311526	0.0338818
LYST	protein_coding	0.37335	0.39322	0.0425046	0.0250255	0.034044
CSF1	protein_coding	0.67188	0.56743	0.0280617	0.0443231	0.0342365
FRS3	protein_coding	0.77054	0.77381	0.0381765	0.0286705	0.0344992
ISG15	protein_coding	0.53011	0.54121	0.0397957	0.0275783	0.0345523
NBPF1	protein_coding	0.33447	0.32766	0.0369549	0.029951	0.034601
GGA1	protein_coding	0.39593	0.42687	0.0454197	0.0246792	0.0349646
AP3S1	protein_coding	-0.40555	-0.34987	0.029889	0.0419486	0.0351233
VPS8	protein_coding	0.32138	0.32557	0.040224	0.0280314	0.0351333
G3BP2	protein_coding	-0.29926	-0.30648	0.041861	0.0271385	0.0352811
RABIF	protein_coding	-0.35971	-0.33646	0.0344255	0.034418	0.0354725
AP1S2	protein_coding	-0.42938	-0.40353	0.0346468	0.034152	0.0354984
WBP2	protein_coding	0.3276	0.32959	0.0402746	0.0288846	0.0357252
DERA	protein_coding	-0.36975	-0.32257	0.0309806	0.041128	0.0357335
NCDN	protein_coding	0.50935	0.4882	0.0361534	0.0329321	0.0358314
SPAG7	protein_coding	-0.44814	-0.47764	0.0450099	0.0262682	0.0360603
C17orf96	protein_coding	-0.70752	-0.58526	0.0287285	0.0493069	0.0362378
CDKN2AIPNL	protein_coding	-0.45001	-0.42064	0.0351281	0.0356631	0.0365357
LSM10	protein_coding	-0.408	-0.43092	0.0446265	0.0273438	0.0367049
PSMA7	protein_coding	-0.4151	-0.36069	0.0320696	0.0418654	0.0368173
GPCPD1	protein_coding	0.38895	0.41546	0.0464932	0.0264079	0.0368632
MRPL15	protein_coding	-0.40369	-0.40214	0.0417565	0.0314195	0.0379905
GON4L	protein_coding	0.30813	0.2875	0.036756	0.0364727	0.038033
HDGFRP3	protein_coding	-0.38187	-0.34419	0.0347926	0.0397528	0.0380926
STXBP2	protein_coding	0.54754	0.51381	0.036784	0.0366528	0.0381716
IL17RD	protein_coding	0.86592	0.79565	0.035279	0.0391717	0.0381784
GPATCH2L	protein_coding	0.31951	0.28537	0.0347276	0.0407457	0.038419
CABP4	protein_coding	0.83905	0.70899	0.03116	0.0498015	0.0385227
HMGCL	protein_coding	0.48295	0.40589	0.0313404	0.0498408	0.0387062
SLC16A5	protein_coding	0.60183	0.56052	0.036784	0.0384365	0.0388329
TOMM22	protein_coding	-0.423	-0.36725	0.0338589	0.0449362	0.039035
ZNF229	protein_coding	0.45161	0.4595	0.04422	0.031302	0.0390933
OBSCN	protein_coding	0.79003	0.81773	0.0458575	0.0302034	0.0391876
HTR1B	protein_coding	-0.40905	-0.37782	0.0371765	0.0391717	0.0394448
DEDD2	protein_coding	0.46837	0.46477	0.0424961	0.0333869	0.039499
ADCY7	protein_coding	0.86684	0.75136	0.0343286	0.0485359	0.0408293
MAP2K6	protein_coding	-0.56841	-0.49934	0.0354367	0.0469631	0.0414114
ZNF791	protein_coding	0.367	0.3325	0.0374911	0.0431185	0.0415017
PARP12	protein_coding	-0.36887	-0.32017	0.0353342	0.0482491	0.0417963
NDUFAB1	protein_coding	-0.3921	-0.35901	0.0388564	0.0419018	0.041924
NNMT	protein_coding	-0.45301	-0.41609	0.0394901	0.0419257	0.0423292
SLC12A9	protein_coding	0.4942	0.47681	0.0429321	0.0379234	0.0424982
MOCOS	protein_coding	0.74833	0.69111	0.0394449	0.0431242	0.0426949
DUSP5	protein_coding	0.42722	0.40439	0.0418504	0.0397952	0.0426964
DCUN1D3	protein_coding	0.34487	0.3336	0.0436146	0.0379075	0.0427767
GSPT1	protein_coding	-0.31584	-0.29029	0.0405165	0.0419166	0.0429403
SCMH1	protein_coding	-0.32758	-0.31545	0.0436811	0.0386646	0.0432757
UBE2D2	protein_coding	-0.30918	-0.31079	0.0481461	0.035439	0.0439877
FDX1	protein_coding	-0.40899	-0.39442	0.0446265	0.0395824	0.0445092
PHYH	protein_coding	0.4931	0.49892	0.0493898	0.0356869	0.0449214
LOX	protein_coding	-0.42045	-0.40106	0.0448506	0.0405107	0.0452177
WDR73	protein_coding	0.34912	0.31909	0.0418504	0.0461215	0.045848
TIMM23	protein_coding	-0.38659	-0.35418	0.042873	0.0452528	0.0462051
ANAPC15	protein_coding	-0.75367	-0.74833	0.0475472	0.0397709	0.0463984
LSM4	protein_coding	-0.53396	-0.49664	0.0440038	0.0448038	0.0467407
MKKS	protein_coding	-0.38008	-0.37447	0.0493421	0.0397129	0.0473933
UNC5C	protein_coding	0.77226	0.75993	0.0486655	0.0403803	0.0474195
MLKL	protein_coding	-0.32906	-0.30018	0.043993	0.0483237	0.0483431
CALM2	protein_coding	-0.42488	-0.38666	0.0453402	0.0487318	0.0497295
PARS2	protein_coding	0.61989	0.57807	0.0460442	0.0482455	0.0499345
