# Supplementary material for: Central role of the p53 pathway in the noncoding-RNA response to oxidative stress
Source: Aging (Albany NY). 2017 Dec 12;9(12):2559–86. doi: 10.18632/aging.101341 (PMC5764393; doi:10.18632/aging.101341)
Supplement: Supplementary file 5 [file aging-09-2559-s005.xlsx]

## Sheet: Fuschi et al. Dataset S4
Dataset S4. Commonly lncRNAs in HUVEC treated with H2O2 for 16 or 36 hrs
Gene name	Gene biotype	log2 fold change H2O2 16 hrs	log2 fold change H2O2 36hrs	p.value.adj.H2O2 16 hrs	p.value.adj.H2O2 36 hrs	F.p.value.adj
RP11-611O2.1	antisense	1.61457	1.77659	0.00014369	2.72e-05	4.04e-05
TMPO-AS1	antisense	-1.28831	-1.76799	0.00092083	6.39e-05	0.00013961
DLEU2	antisense	-0.70314	-1.39753	0.00800958	4.68e-05	0.00015771
AC012360.6	antisense	0.79947	0.86073	0.00057862	0.0001658	0.00021383
RP11-67K19.3	antisense	2.05595	1.89795	0.00047251	0.00049882	0.000327
RP11-132A1.4	antisense	-0.96349	-1.37471	0.00600468	0.00050579	0.00111842
LINC00894	antisense	0.82736	1.39032	0.0184136	0.00038771	0.00113024
SCARNA9	antisense	-0.72629	-1.24278	0.0161517	0.00052518	0.00143371
RP11-243J16.7	antisense	0.92888	0.87379	0.00310838	0.00303986	0.00248791
RP11-17G12.2	antisense	1.26605	1.6766	0.0134021	0.00144024	0.00318611
RP11-114F10.3	antisense	0.80245	1.25136	0.0297641	0.00144029	0.00384969
CTB-47B11.3	antisense	1.26481	1.36226	0.00833662	0.00346696	0.00470186
AC005550.3	antisense	-1.09639	-1.35213	0.0121315	0.0027692	0.0048612
TPT1-AS1	antisense	0.38634	0.57122	0.0354367	0.0029215	0.00707877
RP11-334C17.5	antisense	1.31716	1.56056	0.0168632	0.00422426	0.00729881
RP11-1148L6.5	antisense	-0.53883	-0.37675	0.00531031	0.0243639	0.00762082
RP11-597D13.9	antisense	0.71153	0.71808	0.0107472	0.00694912	0.00780372
C1RL-AS1	antisense	0.89333	1.07873	0.0200083	0.00477035	0.00850918
RP11-244F12.3	antisense	0.43971	0.64387	0.0418504	0.00400079	0.0094319
AC007362.3	antisense	0.77482	1.03812	0.0360385	0.00548191	0.0115636
CTD-2653D5.1	antisense	1.1869	0.88729	0.0128775	0.0394097	0.01821
AC007038.7	antisense	0.4881	0.5814	0.0395402	0.0125509	0.0215124
RP11-543N12.1	antisense	0.87836	0.67352	0.0166225	0.0430715	0.0229293
RP11-266N13.2	antisense	1.31864	1.21793	0.0280688	0.0307212	0.0293236
RP11-295G20.2	antisense	-0.7015	-0.63605	0.037004	0.0445562	0.0417956
NEAT1	lincRNA	1.11784	1.75021	8.18e-05	7.3e-07	2.26e-06
MEG3	lincRNA	0.46463	1.2909	0.0224793	8.26e-06	2.6e-05
RP3-326I13.1	lincRNA	5.24977	3.52359	8.18e-05	0.00095504	8.34e-05
RP11-420A23.1	lincRNA	0.96785	1.79886	0.0108609	6.39e-05	0.00020948
PVT1	lincRNA	0.73757	0.78611	0.00126689	0.00044309	0.00054999
C15orf54	lincRNA	-0.93208	-0.45002	0.00036901	0.0201246	0.00055761
RP11-93I21.3	lincRNA	1.05813	1.60217	0.0103021	0.00035811	0.00097715
FTX	lincRNA	0.41877	0.74411	0.0276017	0.00052128	0.00151863
LINC00910	lincRNA	1.1787	0.91179	0.00158336	0.00560654	0.0019391
AC110769.3	lincRNA	1.45689	1.22162	0.00202389	0.0044324	0.00219627
RP11-553A10.1	lincRNA	1.18832	1.34928	0.00587954	0.0015693	0.00246619
RP11-359M6.1	lincRNA	0.94289	1.20596	0.00954181	0.00121738	0.00249112
CTC-241N9.1	lincRNA	1.48454	1.87601	0.0115499	0.00163229	0.00330621
GS1-124K5.11	lincRNA	0.64707	0.84914	0.0136628	0.00166404	0.00357591
LINC00475	lincRNA	2.10323	2.33018	0.00866064	0.00280741	0.00421221
LINC00205	lincRNA	0.70261	0.99384	0.0253993	0.00236051	0.00551248
LINC00702	lincRNA	-1.20597	-1.50215	0.018201	0.00396091	0.00721492
RP11-64D22.5	lincRNA	1.14549	1.44871	0.0265954	0.00479785	0.0095036
LINC00657	lincRNA	0.40368	0.40659	0.0146154	0.00928926	0.0109336
LINC00520	lincRNA	0.58292	0.77486	0.0390054	0.00649512	0.0134557
RP11-184M15.1	lincRNA	-0.89442	-0.63754	0.00986041	0.0346401	0.0138294
CTD-2619J13.14	lincRNA	0.69071	0.68455	0.0200857	0.0154609	0.0173005
RP11-879F14.2	lincRNA	-0.5228	-0.68333	0.0447135	0.00996629	0.0194017
AC058791.1	lincRNA	0.56469	0.5154	0.0202959	0.0228008	0.0209197
RP11-384K6.6	lincRNA	0.52681	0.4849	0.0224793	0.0247413	0.023256
RP11-434B12.1	lincRNA	0.96964	1.06317	0.0349555	0.0167555	0.0244035
SRP14-AS1	lincRNA	0.78863	0.89481	0.0412801	0.0169939	0.0266644
CTD-3131K8.2	lincRNA	1.00713	1.00287	0.0327132	0.024874	0.0291681
RP11-498C9.15	lincRNA	-0.56969	-0.52893	0.0305277	0.0330125	0.0320984
RP11-138A9.1	lincRNA	0.70987	0.68081	0.0360844	0.0333869	0.0360603
LINC00680	lincRNA	0.52995	0.48446	0.0389987	0.04359	0.0425743
RP4-717I23.3	processed_transcript	0.841	1.67118	0.00518076	1.21e-05	4.12e-05
KIFC1	processed_transcript	-0.89308	-1.60687	0.00283478	2.46e-05	8.23e-05
SHANK3	processed_transcript	0.49195	0.91427	0.0332568	0.0005004	0.0014721
RP11-379B18.5	processed_transcript	1.07586	1.60555	0.0399832	0.00308021	0.00752888
RP11-295P9.3	processed_transcript	0.4698	0.55337	0.0218188	0.0063056	0.0106064
RAD51-AS1	processed_transcript	0.71054	1.04477	0.0491123	0.00480056	0.0113391
FAM95B1	processed_transcript	1.03177	0.85606	0.0147463	0.0279608	0.0181947
CD27-AS1	processed_transcript	0.78387	0.64295	0.0175378	0.0336526	0.0219649
SNHG11	processed_transcript	0.67502	0.6147	0.0273796	0.0315753	0.0291847
RP11-310J24.3	sense_intronic	1.45298	1.60578	0.00542379	0.00179992	0.00258713
SNHG3	sense_intronic	-0.76153	-0.41686	0.00220164	0.0380374	0.0037019
RP3-368A4.6	sense_intronic	0.65597	0.94433	0.0224793	0.00176067	0.00426157
CTD-2574D22.4	sense_intronic	0.67815	0.84587	0.0286636	0.00623108	0.0116203
RP11-22H5.2	sense_intronic	0.61042	0.66178	0.0401784	0.0209626	0.0296648
RP11-363E7.4	sense_overlapping	1.21483	1.04493	9.27e-05	0.00013349	5.84e-05
RP11-448G15.3	sense_overlapping	0.53404	0.45113	0.00671014	0.0120268	0.00743829
