# Supplementary material for: Central role of the p53 pathway in the noncoding-RNA response to oxidative stress
Source: Aging (Albany NY). 2017 Dec 12;9(12):2559–86. doi: 10.18632/aging.101341 (PMC5764393; doi:10.18632/aging.101341)
Supplement: Supplementary file 6 [file aging-09-2559-s006.xlsx]

## Sheet: Fuschi et al. Dataset S5
Dataset S5. Annotated miRNAs significantly modulated in HUVEC treated with H2O2 for 16 hrs
GeneID	log2 fold change	log2 average expression (cpm)	P.Value	adj.P.Val
hsa-miR-192-5p	1.90822	9.40124	3.27512e-07	3.24237e-05
hsa-let-7i-5p	0.637034	12.6345	0.000140436	0.00695159
hsa-miR-411-5p	0.415062	11.9078	0.00065071	0.0151605
hsa-miR-30a-5p	0.650701	13.4863	0.000883899	0.0151605
hsa-miR-769-5p	0.50257	10.2462	0.00112123	0.0151605
hsa-miR-21-3p	0.535367	10.9648	0.00116634	0.0151605
hsa-miR-654-3p	-0.429723	10.8334	0.00121184	0.0151605
hsa-miR-16-5p	-0.495142	13.0602	0.00122509	0.0151605
hsa-miR-381-3p	0.561573	9.85412	0.00185098	0.0203608
hsa-miR-151a-3p	0.362802	14.447	0.0101224	0.100212
hsa-miR-22-3p	-0.312432	15.069	0.0112489	0.10124
hsa-miR-21-5p	0.309876	15.3747	0.0123339	0.101755
hsa-miR-181a-3p	0.290543	10.5504	0.0190669	0.145202
hsa-miR-101-3p	0.51719	9.37561	0.0304072	0.196261
hsa-miR-130b-3p	-0.380197	9.47363	0.0360178	0.198098
hsa-miR-222-3p	-0.254645	15.1733	0.0260062	0.183901
hsa-miR-30a-3p	0.298003	10.4619	0.0354076	0.198098
hsa-miR-10a-5p	-0.215467	15.2138	0.0317189	0.196261
hsa-miR-221-5p	-0.507038	8.54568	0.0678693	0.314989
hsa-miR-216a-3p	0.440486	8.43571	0.129501	0.474837
hsa-miR-125b-5p	-0.263282	10.7103	0.056367	0.293702
hsa-miR-500a-3p	-0.420851	8.5386	0.0995127	0.39407
hsa-miR-671-3p	0.397281	8.66188	0.127721	0.474837
hsa-miR-106b-3p	0.375067	8.07631	0.145079	0.484809
hsa-miR-31-5p	0.224509	12.6934	0.0629565	0.311634
hsa-miR-151a-5p	-0.223908	10.4459	0.0731793	0.314989
hsa-miR-130a-3p	-0.411333	8.26666	0.206305	0.486291
hsa-miR-421	-0.397787	7.96137	0.203901	0.486291
hsa-miR-574-3p	-0.292988	8.74597	0.176294	0.484809
hsa-miR-125a-5p	-0.226767	12.4058	0.0822841	0.339422
hsa-miR-92a-3p	-0.274501	16.0554	0.072899	0.314989
hsa-miR-30e-5p	0.331697	8.61674	0.204491	0.486291
hsa-miR-125b-2-3p	0.2596	9.2269	0.1596	0.484809
hsa-miR-589-5p	-0.359989	7.6385	0.239569	0.539029
hsa-miR-29a-3p	-0.194498	10.1717	0.170378	0.484809
hsa-miR-146a-5p	-0.207949	9.82002	0.22041	0.507456
hsa-miR-584-5p	0.170773	8.36816	0.559314	0.696129
hsa-let-7e-5p	-0.16519	10.9763	0.163684	0.484809
hsa-let-7b-5p	-0.189369	10.0056	0.201196	0.486291
hsa-miR-100-5p	-0.231256	13.7946	0.138252	0.484809
hsa-miR-30e-3p	0.253245	8.11749	0.398059	0.646031
hsa-miR-125b-1-3p	-0.223108	8.5525	0.342802	0.629104
hsa-miR-941	0.170294	10.7326	0.17207	0.484809
hsa-miR-30c-5p	-0.166459	10.6318	0.190534	0.486291
hsa-miR-30d-5p	0.161962	11.5887	0.171615	0.484809
hsa-miR-136-3p	-0.164935	8.05461	0.536404	0.689662
hsa-miR-378a-3p	0.211384	9.22797	0.310107	0.626543
hsa-miR-92b-3p	-0.155507	12.9969	0.167	0.484809
hsa-miR-128-3p	-0.198332	8.70677	0.442251	0.689662
hsa-miR-425-5p	-0.170798	8.22372	0.471416	0.689662
hsa-miR-181b-5p	0.137672	11.5918	0.185718	0.486291
hsa-miR-199a-3p	-0.179666	8.65706	0.498598	0.689662
hsa-miR-660-5p	0.140837	8.46191	0.622515	0.733679
hsa-miR-155-5p	-0.16673	10.6046	0.246116	0.541455
hsa-miR-19b-3p	-0.124783	7.93431	0.691078	0.786399
hsa-miR-345-5p	0.0572808	8.02402	0.815791	0.864139
hsa-miR-140-3p	0.136603	9.76585	0.349502	0.629104
hsa-miR-143-3p	0.160979	7.77386	0.747097	0.831041
hsa-miR-532-5p	0.133749	9.69847	0.333666	0.629104
hsa-miR-15b-5p	-0.164824	8.78888	0.491736	0.689662
hsa-miR-484	-0.141673	8.8008	0.545431	0.692278
hsa-miR-23b-3p	-0.0498574	8.4411	0.839065	0.874394
hsa-miR-204-5p	-0.0833583	7.82435	0.774667	0.833609
hsa-miR-1307-3p	0.0223046	8.22342	0.938316	0.957663
hsa-miR-20a-5p	-0.106522	9.19958	0.521212	0.689662
hsa-miR-93-5p	0.159455	10.0924	0.345992	0.629104
hsa-miR-148a-3p	0.13637	10.0535	0.452822	0.689662
hsa-miR-320a	0.118293	9.28101	0.4654	0.689662
hsa-miR-148b-3p	0.11131	10.6455	0.342938	0.629104
hsa-miR-889-3p	-0.119287	9.05548	0.525465	0.689662
hsa-miR-181a-2-3p	0.130214	10.5757	0.357893	0.632703
hsa-miR-126-3p	-0.172476	13.6593	0.27007	0.581238
hsa-miR-24-3p	0.00471907	8.69381	0.982068	0.982068
hsa-let-7d-5p	-0.0963214	9.31439	0.506366	0.689662
hsa-miR-17-5p	-0.0893779	9.48043	0.56956	0.696129
hsa-miR-25-3p	0.117765	13.0208	0.293311	0.617825
hsa-miR-197-3p	0.0076141	8.77341	0.972775	0.982068
hsa-miR-181a-5p	0.151814	13.3043	0.301813	0.62249
hsa-miR-26b-5p	-0.11216	9.8496	0.526207	0.689662
hsa-let-7f-5p	-0.113567	13.1361	0.321135	0.629104
hsa-miR-27a-3p	0.114628	11.1218	0.394499	0.646031
hsa-miR-23a-3p	-0.0961799	9.73472	0.534913	0.689662
hsa-miR-410-3p	-0.100634	11.3536	0.393598	0.646031
hsa-miR-186-5p	0.0841173	11.2649	0.438774	0.689662
hsa-miR-98-5p	0.088377	11.3104	0.455966	0.689662
hsa-let-7a-5p	-0.0872317	14.774	0.364382	0.632874
hsa-miR-127-3p	0.0941723	14.1219	0.392666	0.646031
hsa-miR-99a-5p	-0.0381475	10.0932	0.820496	0.864139
hsa-let-7c-5p	-0.0158883	10.1596	0.901467	0.929638
hsa-let-7g-5p	0.0402466	10.973	0.706318	0.794607
hsa-miR-27b-3p	-0.0543467	12.2964	0.591839	0.705928
hsa-miR-28-3p	-0.0662458	13.176	0.566509	0.696129
hsa-miR-10b-5p	-0.0603268	17.4257	0.474464	0.689662
hsa-miR-126-5p	-0.0905043	17.7453	0.490232	0.689662
hsa-miR-99b-5p	-0.0524515	13.2236	0.651015	0.758242
hsa-miR-26a-5p	-0.0565968	12.9627	0.65982	0.75956
hsa-miR-191-5p	0.0667997	15.3638	0.581898	0.702536
hsa-miR-409-3p	0.03587	11.9309	0.766245	0.833607
hsa-miR-221-3p	0.0356365	12.5595	0.759632	0.833607
