# Supplementary material for: Central role of the p53 pathway in the noncoding-RNA response to oxidative stress
Source: Aging (Albany NY). 2017 Dec 12;9(12):2559–86. doi: 10.18632/aging.101341 (PMC5764393; doi:10.18632/aging.101341)
Supplement: Supplementary file 7 [file aging-09-2559-s007.xlsx]

## Sheet: Fuschi et al Dataset S6
Dataset S6. lncRNAs modulated by H2O2 in HUVEC and displaying at least one significant ChIP peak for p53 protein in nutilin treated osteosarcoma cells
Gene	# significant peaks	conservation*	FDR§	peak coordinates°	Coverage (reads)	fold_enrichment nutilin vs control	H2O2 16hrs	H2O2 36hrs
AC005154.6	1	0.61	8.12026e-11	30634412	14	6.00387	-	+
AC007099.1	1	0.54	1.52605e-07	75750862	16	3.8208	-	+
AC012668.2	1	0.59	3.19257e-13	216393494	21	5.8519	-	+
AC013271.3	1	0.66	1.16673e-15	110686939	24	6.45675	-	+
AP000654.4	1	0.6	3.90032e-06	86542255	7	4.2688	-	+
CROCCP2	1	0.63	1.96332e-06	16971152	18	3.10483	-	+
DANCR	1	0.59	6.78781e-06	53578672	12	3.45794	-	+
GSN-AS1	1	0.57	3.63764e-17	124049439	21	8.00547	-	+
LINC00152	2	0.62	1.11514e-14	87754931	26	7.18187	+	-
LINC00680	1	0.67	0.00056391	58287776	18	3.25953	+	+
LINC00704	1	0.68	1.37506e-10	4720404	16	5.44397	-	+
MALAT1	1	0.62	4.99655e-05	65265099	13	4.48327	+	+
MIR17HG	1	0.71	2.21335e-06	92001515	7	4.42369	-	+
MIR4435-1HG	2	0.65	1.12722e-13	112252681	28	6.27555	+	-
NEAT1	4	0.77	1e-307	65188802	238	63.5729	+	+
PVT1	1	0.74	4.43017e-306	128808031	232	45.5027	+	+
RP11-184M15.1	1	0.58	0.00011037	129495166	9	4.94096	+	+
RP11-228B15.4	1	0.8	2.7515e-13	130573922	13	7.74146	-	+
RP1-140K8.5	1	0.75	2.42081e-11	3912340	20	5.09505	-	+
RP11-594N15.2	1	0.72	1.61168e-87	79472977	69	29.4151	+	-
RP11-597D13.9	1	0.8	1.33058e-209	159092499	158	42.2932	+	+
RP11-611O2.1	1	0.53	1.48163e-05	69218609	9	5.52961	+	+
RP11-631N16.2	1	0.65	9.9394e-09	62996745	10	5.50295	-	+
RP1-239B22.5	1	0.79	3.69343e-143	17400362	89	49.7665	+	-
RP3-326I13.1	2	0.78	2.46587e-193	43036116	118	59.532	+	+
RP5-1092A3.4	1	0.78	9.84215e-17	28568546	22	7.49284	-	+
SERTAD4-AS1	1	0.59	4.58564e-08	210406796	14	6.22153	+	-
TP53TG1	2	0.82	1.49225e-118	86973990	91	32.0224	-	+
ZNF33B	1	0.83	1.27134e-78	43136454	71	23.4558	+	-
*Conservation defined as the percentage of similarity between the consensus containing the expected nucleotide frequencies and the genomic sequence
§If multiple peaks are annotated on the gene, only the peak with lowest FDR is reported
°Coordinates of the point of highest coverage of the peak
